# Supplementary material for: The diverging role of O-GlcNAc Transferase in corticotroph and somatotroph adenomas
Source: Research Square preprint supplement (doi:10.21203/rs.3.rs-4350199/v1), 2024-05-10
Supplement: Supplementary file 1 [file 1d51544355e6448ad907793f.xlsx]

## Sheet: Table S2 summary_mapping_stats
Sample ID	Total Reads	Total Mapped Reads	% Total Mapped Reads	Unique Mapped Reads	% Unique Mapped Reads
TB055	25060128	24707301	98.5921	23766002	94.8359
TB101	26596126	26181021	98.4392	25076793	94.2874
TB512	23942082	23648417	98.7734	22861953	95.4886
TB586	27118982	26769401	98.7109	25703428	94.7802
TB594	26391722	26072012	98.7886	24213933	91.7482
TB596	28771174	28381080	98.6441	27216567	94.5967
TB599	26217237	25894494	98.769	24515844	93.5104
TB614	28807256	28454430	98.7752	27304660	94.784
TB644	26149172	25786004	98.6112	24801396	94.8458
TB660	27511950	27122888	98.5858	25145814	91.3996
TB675	24077874	23738760	98.5916	21950343	91.164
TB737	27565216	27200176	98.6757	26040957	94.4704
TB738	25958817	25582648	98.5509	24362404	93.8502
TB763	29812338	29409768	98.6497	28192538	94.5667
TB779	27082282	26740793	98.7391	25434958	93.9173
TB784	28278195	27950425	98.8409	26551349	93.8934
TB788	29393286	29005062	98.6792	27872485	94.826
TB789	23459124	22988564	97.9941	19829346	84.5272
TB836	26113206	25761665	98.6538	24515919	93.8832
TB841	26420193	26070143	98.6751	24992169	94.595
TB842	28090659	27733932	98.7301	26578911	94.6183
TB847	25109378	24757749	98.5996	23549817	93.7889
