# Supplementary material for: The diverging role of O-GlcNAc Transferase in corticotroph and somatotroph adenomas
Source: Research Square preprint supplement (doi:10.21203/rs.3.rs-4350199/v1), 2024-05-10
Supplement: Supplementary file 2 [file 344ce4cd95db0a9391f9a641.xlsx]

## Sheet: Correlation OGTwGene GO ACTH No
ID	Term	Nr. Genes	% Associated Genes	Term PValue	Associated Genes Found
GO:0042254	ribosome biogenesis	13	4.0625	2.97573e-05	[DDX51, DDX54, GRWD1, ISG20L2, KRI1, LAS1L, LSG1, MRM3, PES1, PIN4, SART1, SIRT7, USP36]
GO:0120034	positive regulation of plasma membrane bounded cell projection assembly	5	4.06504	0.00907281	[CDC42, DNM2, DPYSL3, TGFBR1, WASF2]
GO:0006364	rRNA processing	10	4.20168	0.000190843	[DDX51, DDX54, KRI1, LAS1L, MRM3, PES1, PIN4, SART1, SIRT7, USP36]
GO:0001510	RNA methylation	4	4.30108	0.0158373	[HSD17B10, MEPCE, MRM3, TRMT61A]
GO:0043433	negative regulation of DNA-binding transcription factor activity	8	4.46927	0.000558264	[BRMS1, CACTIN, CDK5RAP3, NFKBIB, PIAS4, RBCK1, TAF1, WWP2]
GO:0000381	regulation of alternative mRNA splicing, via spliceosome	3	4.61538	0.0297662	[DDX5, HNRNPL, PTBP1]
GO:0043484	regulation of RNA splicing	9	4.63918	0.000192023	[CCNL1, DAZAP1, DDX5, HNRNPH1, HNRNPL, POLR2A, PTBP1, RBM3, SF3B4]
GO:0032479	regulation of type I interferon production	5	4.6729	0.00509127	[CACTIN, G3BP1, IRF3, NPLOC4, OTUD5]
GO:0000398	mRNA splicing, via spliceosome	15	4.79233	9.47075e-07	[CACTIN, CDK13, CWC25, DAZAP1, DDX41, DDX5, EFTUD2, HNRNPH1, HNRNPL, HNRNPM, PRPF31, PTBP1, RBM3, SART1, SF3B4]
GO:0055021	regulation of cardiac muscle tissue growth	3	5.08475	0.0231646	[GSK3A, SAV1, TGFBR1]
GO:0048024	regulation of mRNA splicing, via spliceosome	6	5.17241	0.00130676	[DAZAP1, DDX5, HNRNPL, PTBP1, RBM3, SF3B4]
GO:0072655	establishment of protein localization to mitochondrion	7	5.18518	0.000513764	[BAP1, GSK3A, OXA1L, TIMM50, TOMM40, UBE2J2, USP36]
GO:0016575	histone deacetylation	6	5.50459	0.000946368	[AKAP8, BRMS1, HDAC8, MBD3, SIN3B, SIRT7]
GO:0034243	regulation of transcription elongation from RNA polymerase II promoter	5	5.61798	0.00230629	[BRD4, CDK13, INTS12, MED30, SUPT4H1]
GO:0000380	alternative mRNA splicing, via spliceosome	5	5.81395	0.00198369	[CDK13, DDX5, HNRNPL, HNRNPM, PTBP1]
GO:0097581	lamellipodium organization	6	6.06061	0.000570081	[CDC42, DNM2, MYO9B, VCL, WASF2, WASF3]
GO:0032088	negative regulation of NF-kappaB transcription factor activity	6	6.38298	0.000432234	[BRMS1, CACTIN, CDK5RAP3, NFKBIB, PIAS4, RBCK1]
GO:0000460	maturation of 5.8S rRNA	3	7.89474	0.00703526	[KRI1, LAS1L, PES1]
GO:0071354	cellular response to interleukin-6	3	8.57143	0.00558309	[IL6ST, RELA, SBNO2]
GO:0051491	positive regulation of filopodium assembly	3	8.57143	0.00558309	[CDC42, DPYSL3, TGFBR1]
GO:0032480	negative regulation of type I interferon production	3	9.09091	0.00472493	[CACTIN, NPLOC4, OTUD5]
GO:0010592	positive regulation of lamellipodium assembly	3	9.375	0.00432796	[CDC42, DNM2, WASF2]
GO:0033120	positive regulation of RNA splicing	4	9.52381	0.000911476	[DAZAP1, POLR2A, RBM3, SF3B4]
GO:1903955	positive regulation of protein targeting to mitochondrion	4	11.1111	0.000503398	[BAP1, GSK3A, UBE2J2, USP36]
