# Supplementary material for: The diverging role of O-GlcNAc Transferase in corticotroph and somatotroph adenomas
Source: Research Square preprint supplement (doi:10.21203/rs.3.rs-4350199/v1), 2024-05-10
Supplement: Supplementary file 3 [file 41481b7e75c5ec979522257b.xlsx]

## Sheet: NF Gonadotroph
	R	pvalue	T789	T101	T660	T836	T586	T675	T055
ENSG00000197785	0.857143	0.0136973	18.3944	18.2063	23.0505	17.5482	22.6814	17.1812	21.5725
ENSG00000117616	0.964286	0.000454149	53.8351	49.3778	68.6285	45.0473	53.7237	38.9516	62.9726
ENSG00000142687	0.857143	0.0136973	52.4233	54.6376	62.4941	43.2459	51.5363	40.4488	55.6896
ENSG00000253313	0.821429	0.0234488	9.5223	10.8681	15.3287	8.7903	10.6908	7.7461	13.034
ENSG00000142949	0.785714	0.0362385	22.1976	30.2554	56.1998	11.2992	20.6268	12.4565	29.1853
ENSG00000158966	0.892857	0.00680719	26.5249	29.9345	38.304	20.0132	30.2843	26.3463	37.7284
ENSG00000116754	0.857143	0.0136973	54.8799	54.3501	69.5506	54.2154	58.1822	48.1414	55.1118
ENSG00000207721	0.785714	0.0362385	30.0234	19.0391	23.8862	15.3675	23.0485	6.6935	19.8071
ENSG00000174151	0.785714	0.0362385	12.6646	10.4673	19.2695	11.5747	15.7787	9.9751	14.8288
ENSG00000198162	0.857143	0.0136973	14.5203	13.5925	24.0122	12.6687	17.7786	14.0413	14.6489
ENSG00000132698	0.821429	0.0234488	33.0886	50.1738	82.9725	26.1235	72.1277	31.1031	53.004
ENSG00000143320	0.892857	0.00680719	103.814	127.361	473.053	43.7531	177.866	81.8462	249.112
ENSG00000143224	0.928571	0.00251947	20.2528	19.4586	25.2485	17.3794	18.5262	14.2943	23.5158
ENSG00000116260	0.821429	0.0234488	23.4704	27.4989	36.8439	19.6469	26.6232	15.2829	32.4059
ENSG00000203724	0.821429	0.0234488	7.1072	9.0444	10.5064	3.9655	9.3508	6.2181	9.293
ENSG00000265452	0.785714	0.0362385	30.7383	23.1472	42.7961	23.6001	41.6423	26.0411	35.1498
ENSG00000116005	0.821429	0.0234488	34.1096	36.6628	48.162	29.1	39.9255	32.4793	38.5566
ENSG00000152291	0.785714	0.0362385	71.9335	79.92	112.795	66.7085	91.8165	65.9784	88.6067
ENSG00000115159	0.821429	0.0234488	13.5818	12.6578	24.1883	11.883	19.539	13.0013	13.4591
ENSG00000144357	0.821429	0.0234488	14.812	16.7491	22.8504	12.7502	18.1913	14.3239	16.9614
ENSG00000151690	0.785714	0.0362385	49.9348	61.6285	84.4285	49.488	69.9281	58.7576	74.4708
ENSG00000204104	0.857143	0.0136973	11.439	8.9768	13.6536	8.3012	12.6776	8.7525	10.1337
ENSG00000222020	0.785714	0.0362385	7.6584	7.5124	9.006	5.3899	6.8475	3.9441	7.0397
ENSG00000178035	0.785714	0.0362385	40.9273	45.06	57.1798	39.7164	51.2983	39.5665	46.5219
ENSG00000088538	0.928571	0.00251947	16.6897	16.4695	23.7126	11.3341	19.564	15.07	27.8876
ENSG00000041880	0.857143	0.0136973	13.0271	14.9588	21.0034	12.5254	15.3314	11.4028	15.5138
ENSG00000090097	0.785714	0.0362385	56.5158	113.067	114.856	51.266	70.7763	44.8442	121.278
ENSG00000144749	0.857143	0.0136973	9.6802	7.0581	23.0047	8.9585	10.9767	6.5816	12.1765
ENSG00000175161	0.821429	0.0234488	17.1641	24.1138	25.125	12.1268	22.9695	4.2871	24.7924
ENSG00000114698	-0.892857	0.00680719	1.7492	7.0209	1.3364	6.9045	1.8206	2.6419	1.3701
ENSG00000145194	0.857143	0.0136973	72.1526	47.4503	64.0178	33.9377	49.5081	29.7135	52.4474
ENSG00000231770	0.821429	0.0234488	12.2713	10.9743	18.3576	8.5627	17.4012	11.2145	11.4677
ENSG00000272927	0.857143	0.0136973	14.0137	15.6905	17.072	10.4604	12.4983	10.3101	16.3331
ENSG00000197386	0.785714	0.0362385	16.8006	16.0266	27.4227	16.5431	26.4225	15.6676	18.386
ENSG00000184160	-0.785714	0.0362385	1.8852	7.89	3.0639	9.2494	4.8159	10.8841	6.2018
ENSG00000184178	0.821429	0.0234488	11.718	13.0449	22.0497	11.2035	15.7051	11.2779	13.4063
ENSG00000249242	0.785714	0.0362385	9.5273	6.105	17.4169	7.0202	12.2601	7.4327	10.5796
ENSG00000109323	0.892857	0.00680719	11.6154	9.57	17.7434	9.4247	14.6905	9.5384	12.0062
ENSG00000109436	0.785714	0.0362385	17.3439	27.7618	42.2996	17.2188	31.6728	20.7738	36.2998
ENSG00000168843	-0.785714	0.0362385	0.1753	2.6181	0.5275	19.0857	16.0473	8.8147	1.3572
ENSG00000134352	0.892857	0.00680719	41.0624	40.8372	76.1874	36.3398	60.7336	40.4661	43.7525
ENSG00000145632	-0.964286	0.000454149	8.1968	12.4056	3.5274	16.4461	10.2708	13.0148	9.7413
ENSG00000153914	0.857143	0.0136973	10.8034	11.883	14.5915	10.645	12.4845	9.916	13.5165
ENSG00000145911	0.785714	0.0362385	7.5476	9.3919	12.332	7.2275	9.4353	9.2595	10.8144
ENSG00000047579	-0.821429	0.0234488	15.0743	14.2505	13.9242	19.1615	17.9176	20.1815	9.0417
ENSG00000204580	0.857143	0.0136973	62.2075	57.0685	86.1505	55.4048	65.2655	54.2578	64.7106
ENSG00000124713	0.785714	0.0362385	2.6276	1.8138	4.5511	2.4657	3.9156	1.9331	4.5552
ENSG00000112655	0.821429	0.0234488	14.2023	16.3528	25.5809	8.7262	21.5263	11.3037	18.3731
ENSG00000196586	0.821429	0.0234488	33.4525	31.7431	59.2179	29.486	43.2283	32.9988	33.3638
ENSG00000186439	0.785714	0.0362385	0.7883	0.4277	1.5522	0.4109	0.2958	0.2406	0.7797
ENSG00000079819	0.857143	0.0136973	14.168	15.2699	17.7165	12.5213	15.2476	12.7522	15.7037
ENSG00000106443	0.857143	0.0136973	10.9382	9.8656	13.6267	9.3943	13.1096	10.2554	11.0128
ENSG00000146674	0.857143	0.0136973	32.4029	36.2684	55.8662	13.2276	14.2591	7.0019	48.0727
ENSG00000153956	0.892857	0.00680719	34.1151	43.4783	55.1029	29.043	45.19	32.5837	53.4783
ENSG00000091136	-0.821429	0.0234488	6.171	14.6588	6.7822	25.9369	11.0153	20.9325	12.1374
ENSG00000106123	-0.785714	0.0362385	71.741	77.9477	39.9028	88.3137	104.774	171.969	30.6028
ENSG00000223459	0.857143	0.0136973	6.4151	7.4734	12.3096	5.5758	6.8434	5.7255	8.4458
ENSG00000184368	0.785714	0.0362385	5.7931	21.5849	24.8503	1.8121	21.6357	13.9702	23.0184
ENSG00000198908	0.785714	0.0362385	9.082	9.4769	16.892	7.4048	11.8331	9.2637	11.9982
ENSG00000091879	-0.821429	0.0234488	1.2126	2.16	0.6254	8.0629	4.5263	5.4888	3.7882
ENSG00000205268	0.892857	0.00680719	3.7304	3.0597	4.1845	2.9814	3.6746	3.0391	3.4565
ENSG00000104413	0.857143	0.0136973	9.0521	2.9598	13.5894	0.3163	12.6763	1.4878	6.3361
ENSG00000229422	0.964286	0.000454149	12.2059	10.8066	18.0771	6.8723	14.3649	9.0261	15.0809
ENSG00000106868	0.892857	0.00680719	11.223	12.6482	24.1246	7.1614	14.188	7.6239	15.5288
ENSG00000095261	0.785714	0.0362385	10.5925	10.9216	23.5224	9.9647	20.31	8.0788	12.7859
ENSG00000119333	0.785714	0.0362385	53.0033	66.0227	77.6049	52.4446	74.5531	48.7662	66.0695
ENSG00000148358	0.785714	0.0362385	29.7938	30.7711	41.6535	26.729	33.8606	24.5148	31.1643
ENSG00000165698	0.821429	0.0234488	11.3082	10.3676	14.3715	9.7532	13.7126	10.5219	10.9015
ENSG00000177239	0.892857	0.00680719	34.1344	30.3652	35.892	27.8275	28.0754	22.7052	33.4508
ENSG00000188833	0.785714	0.0362385	0.9518	0.2526	1.0865	0.3495	0.9867	0.7713	0.961
ENSG00000177685	0.857143	0.0136973	45.5301	54.5282	72.1507	26.5694	27.5927	27.4215	88.1382
ENSG00000166407	0.857143	0.0136973	1.6667	4.1782	15.8016	1.3034	1.4489	0.7494	5.7116
ENSG00000049449	0.821429	0.0234488	37.3454	42.2372	44.1229	25.6546	37.8118	28.2205	44.4342
ENSG00000181830	0.857143	0.0136973	7.4248	7.3827	10.1457	7.0652	9.5505	6.9001	7.4363
ENSG00000011347	0.821429	0.0234488	21.0361	16.3482	48.461	13.3944	30.3982	18.334	19.9538
ENSG00000173486	0.821429	0.0234488	402.82	316.17	488.083	287.114	469.439	226.678	343.225
ENSG00000168056	0.857143	0.0136973	98.6622	101.56	131.156	91.0971	109.975	68.2076	117.046
ENSG00000021300	0.821429	0.0234488	37.115	20.3924	109.701	16.7221	48.9983	23.6653	26.0824
ENSG00000149428	0.892857	0.00680719	68.2007	73.8186	122.715	64.3281	87.7898	67.59	95.2885
ENSG00000149418	0.785714	0.0362385	54.4463	21.3845	40.9957	24.0015	27.7156	16.7268	38.428
ENSG00000107742	-0.785714	0.0362385	337.085	254.942	224.293	455.841	452.886	339.235	205.772
ENSG00000250959	0.821429	0.0234488	10.2751	9.8552	18.4839	8.9992	13.3839	8.7355	10.2735
ENSG00000148737	-0.785714	0.0362385	1.8817	2.0358	1.6201	3.7605	3.185	4.1533	2.8491
ENSG00000187164	0.892857	0.00680719	9.4177	10.4265	12.4635	6.8023	11.7322	7.3877	11.8146
ENSG00000165650	0.821429	0.0234488	9.5616	10.5225	12.6166	8.0808	11.9065	9.2513	11.7112
ENSG00000107651	0.857143	0.0136973	8.9362	7.4277	13.8229	7.1117	11.3086	8.6928	9.4839
ENSG00000161813	0.785714	0.0362385	6.9736	5.8535	12.2342	6.0009	9.4578	6.5285	7.5595
ENSG00000170421	0.785714	0.0362385	39.0077	5.0119	47.9147	5.6339	11.692	8.8342	10.0672
ENSG00000166986	0.857143	0.0136973	42.4001	42.8241	56.7042	40.0073	47.5983	35.5642	49.1861
ENSG00000075089	0.785714	0.0362385	17.9448	19.941	30.6408	17.879	27.5213	16.2745	20.0139
ENSG00000122971	-0.785714	0.0362385	4.7868	6.7244	5.6727	6.4882	5.6802	7.6956	4.0312
ENSG00000100439	-0.785714	0.0362385	8.1319	12.8988	11.0092	17.2371	14.6106	13.3516	11.5514
ENSG00000197324	0.857143	0.0136973	23.5158	24.0586	25.6343	20.1932	23.3951	15.67	25.1808
ENSG00000100462	0.821429	0.0234488	24.001	25.2075	38.6609	22.7446	28.8553	23.1121	26.8917
ENSG00000100867	-0.857143	0.0136973	2.4231	4.4965	3.2794	12.4476	11.9283	12.0218	0.6312
ENSG00000205978	0.785714	0.0362385	13.9126	17.6112	39.4445	10.1481	26.0752	8.4375	23.7686
ENSG00000176165	0.785714	0.0362385	5.0599	6.723	25.6393	2.3022	8.3129	6.0379	11.1484
ENSG00000092148	0.857143	0.0136973	19.3099	18.6709	25.4384	18.7781	21.236	18.2087	23.4502
ENSG00000151320	0.892857	0.00680719	9.9309	9.8614	17.8852	8.4323	12.5112	9.3628	10.8685
ENSG00000100612	-0.821429	0.0234488	44.0116	57.8471	35.8127	48.0478	47.5655	51.4323	47.3404
ENSG00000126804	1	0	9.6415	9.356	13.2933	8.5055	9.6007	9.0002	9.8665
ENSG00000126803	0.785714	0.0362385	5.2415	3.4543	17.2681	2.5546	4.299	5.7794	6.1135
ENSG00000070182	0.785714	0.0362385	16.088	20.6589	32.4801	15.8023	21.0618	18.0483	22.1364
ENSG00000009830	0.785714	0.0362385	9.2526	10.3787	10.7632	9.0678	9.7282	7.0173	11.4718
ENSG00000100815	0.857143	0.0136973	8.894	8.495	11.8708	7.4859	10.747	8.3139	8.6824
ENSG00000066629	0.785714	0.0362385	9.865	8.6937	14.8457	8.8612	14.4389	9.7806	11.1532
ENSG00000080824	0.857143	0.0136973	542.967	512.709	939.109	497.826	637.514	533.283	637.201
ENSG00000245849	0.964286	0.000454149	18.4766	18.1017	30.6588	16.8837	24.4059	17.5137	24.8415
ENSG00000183578	-0.785714	0.0362385	0.8236	0.8079	0.732	6.5694	1.4319	0.8584	0.5479
ENSG00000169032	0.785714	0.0362385	37.373	32.4783	58.6781	37.2679	56.2675	37.335	38.76
ENSG00000255769	0.857143	0.0136973	16.3562	15.2513	19.4992	3.9468	12.6016	12.8358	15.9554
ENSG00000214575	0.785714	0.0362385	18.5297	14.3631	21.9581	10.7653	22.2268	17.5882	22.4772
ENSG00000207703	0.928571	0.00251947	18.1381	16.7458	35.015	16.0194	21.1997	15.6994	27.8741
ENSG00000260284	-0.821429	0.0234488	4.2328	11.0723	2.9466	14.2632	4.014	7.7382	7.4466
ENSG00000260710	-0.857143	0.0136973	2.5673	1.9188	1.6049	8.26	2.1862	3.238	1.7744
ENSG00000185338	-0.892857	0.00680719	2.2994	2.5062	1.3625	6.4732	4.8543	4.0413	1.9468
ENSG00000280789	0.857143	0.0136973	43.3738	46.8385	55.5193	42.7722	49.4618	40.8566	54.1783
ENSG00000174938	0.821429	0.0234488	316.855	350.33	557.224	277.344	477.968	295.077	394.092
ENSG00000179958	0.857143	0.0136973	23.755	21.6839	43.4458	17.4848	30.9749	19.6615	22.3387
ENSG00000187193	0.785714	0.0362385	22.8374	12.2364	21.5067	13.6658	21.2416	10.5194	27.9899
ENSG00000006210	0.785714	0.0362385	18.557	16.6254	29.8278	17.469	25.4907	7.2545	19.9486
ENSG00000172824	0.785714	0.0362385	48.5953	46.0744	58.6622	38.3945	43.711	24.4317	44.0637
ENSG00000132361	0.857143	0.0136973	28.7117	29.692	34.3485	24.6763	28.4737	24.2605	33.7062
ENSG00000129219	0.857143	0.0136973	12.4135	12.5825	20.7239	10.9728	11.2591	8.7383	13.0335
ENSG00000276728	0.785714	0.0362385	8.4265	7.7001	11.4303	6.832	12.9926	7.5386	8.8057
ENSG00000005884	0.785714	0.0362385	53.2342	61.921	94.0187	52.2354	75.8687	49.2604	68.841
ENSG00000108387	-0.785714	0.0362385	8.4669	12.3512	11.3934	21.0452	20.7671	16.4244	11.495
ENSG00000266392	1	0	14.9034	14.6193	28.5307	10.4889	14.8061	10.9647	27.0383
ENSG00000215251	0.785714	0.0362385	11.3117	9.5783	16.5288	10.3466	15.0921	9.4939	11.9725
ENSG00000125869	-0.857143	0.0136973	253.236	176.556	9.9341	411.194	198.195	343.977	107.332
ENSG00000188559	0.892857	0.00680719	6.9287	8.9316	12.6626	5.8138	9.1301	6.1079	10.271
ENSG00000131067	0.857143	0.0136973	62.6392	68.6605	78.5653	60.9708	69.9355	41.0287	75.5797
ENSG00000160953	0.785714	0.0362385	30.6721	36.2049	63.9082	27.0427	40.2593	32.2911	44.5574
ENSG00000130545	0.857143	0.0136973	22.2638	24.7481	29.9196	20.9614	28.344	18.2962	29.8169
ENSG00000142546	0.821429	0.0234488	42.2987	43.5069	67.9418	38.6038	62.4164	40.0566	45.9537
ENSG00000269194	0.964286	0.000454149	23.2472	22.0414	30.3688	20.9677	22.4228	15.9409	23.3674
ENSG00000167747	0.857143	0.0136973	7.9661	9.8689	13.0518	7.8812	11.4235	6.7182	11.6839
ENSG00000226696	0.821429	0.0234488	10.6267	10.5779	20.0607	9.5308	11.2114	10.7933	13.4672
ENSG00000167617	-0.857143	0.0136973	6.4986	6.913	3.5545	19.7582	7.4892	6.6298	5.1561
ENSG00000056487	0.785714	0.0362385	9.6699	9.4811	12.9884	8.0786	12.8698	10.066	14.4295
ENSG00000159086	0.857143	0.0136973	12.2214	12.9551	16.3423	10.6285	12.853	11.8928	13.3055
ENSG00000210049	0.821429	0.0234488	1183.56	1040.65	1160.92	656.148	824.4	533.485	1063.63
ENSG00000273748	0.857143	0.0136973	66.5696	36.0374	151.167	64.8367	65.8217	54.1601	85.476
