# Supplementary material for: The diverging role of O-GlcNAc Transferase in corticotroph and somatotroph adenomas
Source: Research Square preprint supplement (doi:10.21203/rs.3.rs-4350199/v1), 2024-05-10
Supplement: Supplementary file 4 [file 4c1a3e9b478a32adca5cf31a.xlsx]

## Sheet: Differential_expression_analysi
ID	Gene.name	log2FoldChange	pvalue	padj	TB512	TB594	TB596	TB599	TB614	TB644	TB737	TB738	TB763	TB779	TB784	TB788	TB841	TB842	TB847
ENSG00000000003	TSPAN6	2.01615	0.000288315	0.00531407	2982.85	1419.11	611.853	7518.81	1240.06	523.13	660.928	1139.36	1849.25	424.988	1849.51	2586.18	1096.97	1630.13	1270.19
ENSG00000000419	DPM1	0.163904	0.434035	0.722281	499.892	791.805	511.36	915.761	832.598	652.045	811.226	756.626	585.922	665.395	716.296	579.434	518.329	550.92	638.079
ENSG00000000457	SCYL3	-0.428643	0.202469	0.496442	196.891	162.309	325.492	90.3799	188.513	385.809	360.331	311.09	247.801	278.223	201.929	267.431	280.579	257.618	373.291
ENSG00000000460	C1orf112	-0.0816145	0.801184	0.925136	51.8756	40.5773	56.9166	26.5823	43.2008	60.7205	70.3319	40.2356	54.4236	27.9124	51.2357	37.4809	55.941	46.1276	30.8587
ENSG00000000938	FGR	-0.892272	0.135314	0.400222	9.43192	28.5138	26.6796	21.2659	31.4188	17.7491	15.4152	301.277	59.0554	102.645	18.0832	8.10397	27.9705	30.4616	40.8132
ENSG00000000971	CFH	-2.54628	NA	NA	21.2218	66.8977	77.371	47.8482	82.4743	48.5764	48.1726	7118.77	849.935	2183.47	62.2866	28.3639	97.0227	110.532	91.5808
ENSG00000001036	FUCA2	-0.0934497	0.802375	0.92566	758.091	1318.21	877.76	1668.04	1106.53	1103.24	1089.66	913.644	889.305	1102.09	760.499	368.731	448.402	818.982	1420.5
ENSG00000001084	GCLC	-0.919086	0.000254302	0.00482792	598.927	976.048	1636.35	1141.71	973.982	1332.11	739.931	492.641	506.024	1640.53	779.587	925.879	950.123	907.756	757.532
ENSG00000001167	NFYA	-0.122698	0.660055	0.862103	323.043	469.38	507.803	232.595	437.899	468.015	273.62	450.443	402.966	428.59	386.78	531.823	705.381	414.278	528.58
ENSG00000001460	STPG1	-0.2821	0.241089	0.54597	374.919	311.458	493.573	272.469	449.681	543.682	549.167	326.792	323.068	488.917	554.552	501.433	405.572	382.076	566.407
ENSG00000001461	NIPAL3	0.160975	0.553756	0.803684	875.99	869.67	765.706	1030.07	694.159	896.795	1618.6	1016.69	632.24	799.554	841.874	632.11	813.767	724.986	1260.23
ENSG00000001497	LAS1L	0.148354	0.687567	0.874687	997.426	934.374	1262.84	3060.96	830.634	882.782	1199.5	935.233	876.568	903.1	805.707	1016.04	906.419	1029.6	926.758
ENSG00000001561	ENPP4	0.0523431	0.876565	0.95672	743.943	3049.88	1193.47	1301.21	1479.63	1542.3	1195.64	758.589	1254.06	1293.87	1637.53	1323.99	1447.47	1346.4	1175.62
ENSG00000001617	SEMA3F	-1.71163	0.0348376	0.177279	202.786	55.9308	1997.42	47.8482	133.53	70.0621	107.907	671.248	244.327	324.144	179.827	82.0527	237.749	614.454	342.432
ENSG00000001626	CFTR	1.2829	0.0945544	0.325237	17.6849	43.8673	7.11457	37.2153	14.7276	1.86832	2.89035	21.5899	6.9477	10.8048	6.02774	10.13	8.74078	12.1846	326.505
ENSG00000001629	ANKIB1	-0.533827	0.0330012	0.171668	693.246	924.504	1503.84	883.863	647.031	1125.66	1430.73	1006.87	647.294	1127.3	944.345	574.369	812.893	803.316	1010.37
ENSG00000001630	CYP51A1	1.14608	0.0121481	0.0880402	199.249	369.582	99.604	131.583	170.84	128.914	524.118	212.955	142.428	97.2431	253.165	70.9098	375.854	217.583	214.02
ENSG00000001631	KRIT1	0.347173	0.103097	0.343344	763.986	1214.03	866.199	1589.62	1297.99	910.807	1024.15	823.359	1019	889.594	1452.68	925.879	1041.03	1247.19	1170.64
ENSG00000002016	RAD52	-0.230691	0.370084	0.672127	219.292	257.721	423.317	207.342	186.549	263.433	241.826	309.128	362.438	239.506	221.017	398.108	257.853	222.805	273.747
ENSG00000002079	MYH16	0.811696	0.211044	0.508315	5.89495	16.4502	5.33593	9.30382	2.94551	6.53913	19.269	20.6085	3.47385	8.10359	17.0786	19.2469	6.99263	8.70332	9.95443
ENSG00000002330	BAD	-0.844754	2.04175e-05	0.000681759	1164.84	823.609	1385.56	813.419	1172.31	1668.41	897.937	937.196	621.819	1649.53	702.231	794.189	822.508	709.32	1016.35
ENSG00000002549	LAP3	0.126571	0.700617	0.880577	792.282	577.952	810.172	551.583	1126.17	544.616	799.665	1646.72	942.571	980.534	785.615	1104.17	595.247	676.248	599.257
ENSG00000002586	CD99	1.76051	0.112991	0.362115	2570.2	155.729	144.959	219.304	11849.8	161.61	139.7	4390.59	897.411	1667.54	3529.24	215.768	2013.88	345.522	427.045
ENSG00000002587	HS3ST1	3.54001	0.00251809	0.0282592	108.467	39.4806	8.89322	184.747	2482.08	12.1441	10.598	482.828	159.797	81.0359	777.578	144.859	14.8593	321.152	22.8952
ENSG00000002745	WNT16	2.02747	0.161532	0.439878	16.5059	80.0579	19.5651	11753.4	15.7094	0.934161	372.856	103.043	2.3159	28.8128	0	153.975	2.62224	25.2396	0
ENSG00000002746	HECW1	-0.366433	0.774467	0.915059	41.2647	9.87015	96.0467	1.32912	3.92735	2.80248	0.963451	99.1171	9.26359	27.012	3.01387	5.06498	180.06	32.2023	3.98177
ENSG00000002822	MAD1L1	0.429043	0.111191	0.358707	960.877	469.38	571.834	677.849	671.577	391.414	377.673	572.131	583.606	514.128	780.592	920.814	671.292	787.65	483.785
ENSG00000002834	LASP1	0.115597	0.797191	0.924119	2010.18	4135.59	738.137	1727.85	1384.39	2606.31	2770.89	4132.5	1401.12	3558.38	1807.32	1754.51	2415.08	2017.43	4357.05
ENSG00000002919	SNX11	-0.0878474	0.794921	0.922451	465.701	513.248	356.618	506.393	428.081	703.423	1193.72	626.106	416.862	596.064	396.826	418.368	395.958	394.26	476.817
ENSG00000002933	TMEM176A	-0.414553	0.648303	0.85588	1122.4	97.6048	1160.56	26.5823	486.991	611.876	82.8568	263.985	1201.95	351.156	885.072	48.6238	1137.18	912.978	106.512
ENSG00000003056	M6PR	0.232131	0.427012	0.718281	800.535	1907.13	1040.51	2145.19	1025.04	1225.62	1988.56	1227.68	1141.74	1128.2	969.461	1180.14	998.198	1168.86	1396.61
ENSG00000003096	KLHL13	0.363892	0.620133	0.841366	321.864	61.4143	85.3749	470.507	311.242	92.482	27.9401	74.5831	100.742	185.482	173.8	28.3639	118.001	138.383	44.7949
ENSG00000003137	CYP26B1	-0.710568	NA	NA	4.71596	8.77347	37.3515	34.557	11.782	14.9466	31.7939	2228.66	182.956	207.992	10.0462	39.5069	6.11855	60.9232	199.089
ENSG00000003147	ICA1	-0.0473075	0.873257	0.955471	1388.85	751.228	826.18	1120.45	764.851	1203.2	571.327	515.213	854.567	540.239	946.354	895.489	709.752	715.413	715.724
ENSG00000003249	DBNDD1	-0.478708	0.378444	0.678731	640.192	1182.22	606.517	312.342	282.769	483.895	127.176	114.819	229.274	586.16	252.16	361.64	540.18	326.374	443.968
ENSG00000003393	ALS2	0.109442	0.616246	0.839213	651.982	352.035	578.948	498.419	675.504	610.941	487.506	578.019	530.341	447.498	615.834	557.148	754.33	792.002	569.394
ENSG00000003400	CASP10	-0.0730642	0.919734	0.971089	15.3269	12.0635	33.7942	46.5191	15.7094	24.2882	8.67106	156.036	56.7395	60.3267	22.1017	21.2729	29.7187	31.3319	34.8405
ENSG00000003402	CFLAR	0.456303	0.212852	0.509973	746.301	615.239	686.556	1738.48	1314.68	745.461	488.47	2119.73	1206.58	992.239	979.507	926.892	937.012	1201.06	1031.28
ENSG00000003436	TFPI	-2.67098	NA	NA	2.35798	15.3536	22.233	10.6329	16.6912	20.5515	22.1594	925.42	104.215	429.49	20.0925	8.10397	36.7113	20.888	18.9134
ENSG00000003509	NDUFAF7	-0.242985	0.21804	0.516725	291.211	241.27	369.068	236.583	267.06	314.812	217.74	267.911	392.545	318.741	267.23	377.848	271.838	233.249	325.51
ENSG00000003756	RBM5	-0.0834176	0.73268	0.895895	2625.61	2515.79	4805	4056.46	3424.65	3537.67	3189.02	3738.97	5314.99	2823.65	2922.45	4819.84	3224.48	2885.15	3440.25
ENSG00000003987	MTMR7	-0.41279	0.450294	0.734964	561.199	776.452	851.081	269.811	162.985	677.267	570.363	228.656	292.961	591.562	490.256	1740.33	420.432	318.541	537.539
ENSG00000003989	SLC7A2	-0.0122129	0.98702	0.994307	18.8638	182.049	114.722	99.6837	27.4914	146.663	367.075	2144.27	169.061	210.693	30.1387	479.147	54.1929	134.901	168.23
ENSG00000004059	ARF5	-0.227733	0.347642	0.653846	4022.72	4228.81	2641.29	4315.64	2653.91	3949.63	2572.42	2169.78	2423.59	4330.92	2762.71	3110.91	2567.17	2936.5	3546.76
ENSG00000004139	SARM1	0.252902	0.5775	0.817674	557.663	490.217	733.69	431.963	669.613	570.772	2191.85	836.116	493.286	496.12	522.404	454.835	548.047	438.647	946.667
ENSG00000004142	POLDIP2	0.0646402	0.851961	0.946847	1859.27	1986.09	2102.36	2194.37	2554.74	2237.32	6004.23	2590.78	1629.23	2430.18	1979.11	1774.77	1956.19	1801.59	1988.9
ENSG00000004399	PLXND1	0.274269	0.727901	0.893263	637.834	270.881	417.981	213.988	677.468	212.989	397.905	4728.18	1229.74	1835.91	518.385	338.341	1277.03	776.336	867.031
ENSG00000004455	AK2	0.0834769	0.702227	0.880979	1636.44	1257.9	1493.17	1529.81	1647.52	1474.11	2657.2	2022.58	1387.22	1583.8	1490.86	1393.88	1691.34	1255.89	1316.97
ENSG00000004468	CD38	-0.277948	0.797912	0.924391	0	6.5801	25.7903	5.31647	3.92735	11.2099	295.78	116.782	5.78975	25.2112	3.01387	12.156	8.74078	20.0176	10.9499
ENSG00000004478	FKBP4	0.4977	0.0530985	0.232418	4644.04	4787.02	2908.97	4621.34	3467.85	2978.11	5642.93	2642.79	3451.85	2436.48	3949.17	5286.83	2712.27	3126.23	2679.73
ENSG00000004487	KDM1A	-0.255077	0.320505	0.631029	1869.88	1109.84	2667.08	2295.38	2271.97	2232.65	3125.44	1565.26	1450.91	1978.18	1900.75	1861.89	1547.12	1792.01	2262.64
ENSG00000004534	RBM6	-0.261048	0.357116	0.661367	2395.71	1613.22	3839.2	3102.16	2862.06	3249.95	1634.98	2541.72	3490.06	2912.79	2460.32	4864.41	3166.79	2431.71	2823.08
ENSG00000004660	CAMKK1	-1.23463	0.00420539	0.0415765	1136.55	411.256	2120.14	560.887	1625.92	3021.08	705.246	710.503	1213.53	2629.16	1672.7	1452.64	938.76	2157.55	621.157
ENSG00000004700	RECQL	0.299783	0.414765	0.707796	152.09	517.634	231.224	297.722	208.149	150.4	396.942	386.655	194.535	267.418	218.003	173.222	229.883	183.64	237.911
ENSG00000004766	VPS50	0.140613	0.63297	0.848175	398.499	857.606	528.257	857.28	427.099	472.686	561.692	377.823	481.707	439.395	625.88	298.834	485.988	466.498	514.644
ENSG00000004776	HSPB6	-2.29256	0.0191368	0.119224	11.7899	8.77347	853.749	10.6329	92.2927	246.619	39.5015	390.58	96.1098	181.881	55.2542	9.11697	17.4816	234.119	80.6309
ENSG00000004777	ARHGAP33	-0.367491	0.344099	0.651716	1272.13	1396.08	3656	1527.16	1025.04	1184.52	1187.94	893.035	2929.61	1201.13	1623.47	2245.81	1402.02	1246.31	1984.91
ENSG00000004779	NDUFAB1	-0.345999	0.323044	0.633659	1603.43	2328.26	1463.82	1967.09	1543.45	1875.8	610.828	667.323	956.466	1575.7	1206.55	1007.93	1129.31	1119.25	1330.91
ENSG00000004799	PDK4	2.17681	0.0305818	0.163063	763.986	216.047	1732.4	24873.1	6250.38	354.047	2681.29	3206.09	701.717	545.642	4334.95	1440.48	364.491	1627.52	1145.76
ENSG00000004809	SLC22A16	-3.60434	0.000322076	0.00583428	17.6849	0	67.5884	2.65823	1.96367	41.1031	16.3787	12.7576	1.15795	81.9363	2.00925	2.02599	2.62224	3.48133	0
ENSG00000004838	ZMYND10	0.40426	0.43396	0.722281	226.366	87.7347	150.295	46.5191	258.223	86.877	89.601	245.339	149.375	180.98	437.011	131.69	250.861	177.548	112.485
ENSG00000004864	SLC25A13	-0.855203	0.0127369	0.0911924	207.502	287.331	945.349	624.685	530.192	898.663	627.207	557.411	380.965	683.403	571.63	249.197	354.002	544.828	653.011
ENSG00000004866	ST7	-0.00354027	0.990864	0.995428	522.293	668.977	528.257	1061.96	861.071	598.797	473.055	341.512	449.284	582.558	473.177	585.512	362.743	487.386	537.539
ENSG00000004897	CDC27	0.0666882	0.856799	0.94913	914.897	989.208	1099.2	543.609	1161.51	1157.43	2858.56	1473.02	818.67	1056.17	1015.67	878.268	1025.29	1000.88	1196.52
ENSG00000004939	SLC4A1	1.42102	0.188479	0.477899	1.17899	4.38673	0.889322	23.9241	8.83653	2.80248	1.9269	166.831	19.6851	5.40239	2.00925	7.09098	0	5.22199	17.918
ENSG00000004961	HCCS	0.474531	0.108969	0.354922	433.869	381.646	245.453	806.774	363.28	311.076	466.31	281.65	299.909	285.426	286.317	308.964	349.631	391.649	312.569
ENSG00000004975	DVL2	0.195904	0.610164	0.835912	1616.4	853.219	2132.59	1473.99	4025.53	1816.94	3794.07	1959.77	2505.8	1491.06	1951.98	1638.02	1670.36	2125.35	1311.99
ENSG00000005001	PRSS22	0.397125	0.595649	0.827645	122.615	21.9337	104.051	66.4558	254.296	94.3503	44.3188	121.688	236.222	207.092	258.188	23.2989	478.121	379.465	128.412
ENSG00000005007	UPF1	-0.25583	0.30627	0.61644	2433.44	2745	5262.12	4027.22	3278.35	3117.3	5340.41	3745.84	3158.89	3266.65	2352.83	2851.59	3263.81	2753.73	3063.97
ENSG00000005020	SKAP2	0.673859	0.195988	0.488611	174.491	108.572	61.3632	162.152	188.513	137.322	230.265	235.526	208.431	155.769	505.325	194.495	71.6744	53.0902	129.408
ENSG00000005022	SLC25A5	-0.413108	0.325719	0.635682	1273.31	3047.68	2291.78	5172.92	1577.81	3041.63	3067.63	2289.51	1346.7	3127.99	1718.91	1199.39	1655.5	1100.97	1969.98
ENSG00000005059	MCUB	-1.51532	9.88091e-05	0.00231423	249.946	183.146	193.872	126.266	227.786	646.44	228.338	266.929	209.589	793.251	214.989	165.118	194.045	142.734	76.6491
ENSG00000005075	POLR2J	-0.13259	0.660126	0.862111	1178.99	1385.11	884.875	2287.41	1222.39	1469.44	1147.47	835.135	903.2	1334.39	925.257	817.488	944.005	918.2	897.89
ENSG00000005100	DHX33	-0.352523	0.301446	0.611589	264.094	290.621	389.523	158.165	227.786	467.081	613.719	451.424	328.858	325.944	186.86	260.34	269.216	340.3	311.574
ENSG00000005102	MEOX1	-3.16679	NA	NA	0	1.09668	0	0	0.981837	0.934161	0	421.002	8.10565	26.1116	0	0	0	0	1.99089
ENSG00000005108	THSD7A	-2.60877	0.000265649	0.00498348	30.6538	25.2237	522.921	45.19	23.5641	399.821	118.505	233.563	54.4236	546.542	30.1387	29.3769	44.578	60.9232	266.779
ENSG00000005156	LIG3	0.775579	0.0674325	0.267043	516.398	592.209	447.329	451.9	553.756	272.775	1808.4	609.423	451.6	343.952	482.219	292.756	507.84	521.329	497.722
ENSG00000005175	RPAP3	-0.524264	0.0179765	0.114372	412.647	464.994	580.727	571.52	417.281	602.534	545.313	390.58	236.222	605.068	420.937	358.601	361.868	331.596	463.877
ENSG00000005187	ACSM3	0.268612	0.634987	0.849307	10.6109	8.77347	22.233	29.2406	24.5459	16.8149	11.5614	13.739	10.4215	8.10359	26.1202	16.2079	7.86671	40.0352	27.8724
ENSG00000005189	REXO5	0.99929	0.0522848	0.23017	272.347	89.928	65.8098	82.4052	174.767	95.2844	94.4182	82.434	93.7939	73.8327	456.099	97.2477	185.305	150.567	98.5489
ENSG00000005194	CIAPIN1	-0.953343	0.000884485	0.0125657	805.251	897.087	1691.49	1608.23	756.015	1458.23	520.264	515.213	707.507	1502.77	615.834	798.241	718.492	809.408	863.049
ENSG00000005206	SPPL2B	-0.375272	0.441828	0.7281	1733.12	1810.62	7847.37	7995.97	2214.04	3315.34	4929.98	3042.21	7035.7	3118.08	2794.86	5298.99	2305.82	2412.56	2467.7
ENSG00000005238	FAM214B	-0.636389	0.098582	0.33417	225.187	922.311	950.685	430.634	311.242	681.938	489.433	440.629	500.234	689.705	392.807	379.874	387.217	462.146	1034.27
ENSG00000005243	COPZ2	-0.980241	NA	NA	23.5798	101.992	18.6758	95.6964	116.839	28.0248	101.162	1013.74	88.0041	386.271	38.1757	54.7018	57.6892	67.8859	58.7312
ENSG00000005249	PRKAR2B	0.44481	0.296495	0.606676	541.157	436.48	491.795	1398.23	1242.02	597.863	1177.34	658.491	267.486	683.403	725.337	645.279	606.61	586.603	1368.73
ENSG00000005302	MSL3	0.0607685	0.829846	0.938335	282.958	384.936	288.14	430.634	181.64	271.841	273.62	467.126	303.383	323.243	278.28	243.119	234.253	207.139	400.168
ENSG00000005339	CREBBP	0.126469	0.570135	0.813389	1522.08	2031.06	1841.79	2809.75	1370.64	1509.6	1478.9	2059.87	1885.14	1599.11	1260.8	2021.94	1759.52	1948.67	1471.27
ENSG00000005379	TSPOAP1	-0.316487	0.39023	0.687004	2335.58	831.286	3049.48	1052.66	1195.88	1853.38	1035.71	1207.07	2138.73	1466.75	1553.15	2268.1	2627.48	1801.59	2411.96
ENSG00000005421	PON1	0.0798183	0.931295	0.975099	8.25293	9.87015	40.9088	10.6329	39.2735	22.4199	6.74416	7.85086	5.78975	10.8048	25.1156	5.06498	18.3556	143.605	31.8542
ENSG00000005436	GCFC2	-0.132564	0.456555	0.739265	338.37	303.781	422.428	320.317	422.19	352.179	266.876	275.761	348.543	334.948	370.706	384.939	273.587	424.722	318.542
ENSG00000005448	WDR54	0.280692	0.315487	0.625892	1582.21	1380.72	877.76	1011.46	1295.04	1062.14	652.257	581.945	1397.64	964.327	1252.76	1542.79	1307.62	1073.99	1034.27
ENSG00000005469	CROT	0.25157	0.3724	0.673495	122.615	233.594	165.414	320.317	162.985	159.742	151.262	287.538	147.06	177.379	211.975	168.157	152.964	207.139	228.952
ENSG00000005471	ABCB4	0.355474	0.667224	0.865514	37.7277	15.3536	10.6719	6.64558	0.981837	9.34161	4.81726	34.3475	12.7374	9.00399	4.01849	7.09098	13.9853	5.22199	5.97266
ENSG00000005483	KMT2E	0.086075	0.680515	0.871853	1182.53	1212.93	1427.36	2029.56	1178.2	1327.44	1990.49	1995.1	1417.33	1448.74	1243.72	1250.04	1530.51	1416.9	1401.58
ENSG00000005486	RHBDD2	0.00753839	0.983027	0.993802	11271.1	17125.8	12593.7	20201.2	11276.4	10649.4	7164.22	4306.2	9683.93	11919.5	14000.4	13625.8	7273.21	13375.3	12085.7
ENSG00000005513	SOX8	1.61843	0.218702	0.517709	15.3269	104.185	4.44661	5.31647	1.96367	0	0	87.3408	44.0021	25.2112	6.02774	30.3899	17.4816	51.3496	0.995443
ENSG00000005700	IBTK	-0.0826656	0.816906	0.932441	781.671	2316.19	1045.84	945.002	662.74	990.211	726.442	720.316	748.035	1133.6	1332.13	893.463	603.114	1028.73	1215.44
ENSG00000005801	ZNF195	0.0921611	0.639365	0.851423	282.958	218.24	268.575	256.52	322.043	314.812	385.381	280.668	229.274	200.789	297.368	263.379	317.29	248.915	238.906
ENSG00000005810	MYCBP2	0.481791	0.00058353	0.00926128	1704.82	1855.59	1425.58	2162.47	1872.36	1600.22	2337.33	1779.2	2073.89	1296.57	2404.06	2191.11	2096.91	2043.54	1621.58
ENSG00000005812	FBXL3	0.314168	0.201259	0.495092	859.484	1268.86	774.599	995.508	889.544	790.3	1402.79	1547.6	811.722	888.694	811.735	1170.01	936.138	667.544	841.15
ENSG00000005844	ITGAL	-0.925069	0.312405	0.622895	12.9689	26.3204	87.1535	26.5823	19.6367	47.6422	11.5614	271.836	46.318	113.45	21.0971	3.03899	18.3556	18.277	46.7858
ENSG00000005882	PDK2	-0.104222	0.805952	0.927596	1362.91	524.215	613.632	215.317	866.962	1001.42	1194.68	925.42	745.719	1121	1237.69	451.797	1152.04	843.351	659.979
ENSG00000005884	ITGA3	-0.352657	0.252307	0.558567	4411.78	2777.9	7488.09	3191.21	3785.96	4239.22	6990.8	3328.76	4727.91	4723.49	4225.44	4215.08	3104.73	3450.86	7322.48
ENSG00000005889	ZFX	-0.454686	0.0232589	0.136025	534.083	458.414	755.923	752.28	484.046	832.338	549.167	688.913	399.493	754.534	615.834	443.693	675.663	691.043	544.507
ENSG00000005893	LAMP2	-0.398169	0.103793	0.344779	1629.36	2167.05	3042.37	4222.6	2726.56	3763.74	2563.74	2043.19	2253.37	3179.31	3037.98	2202.25	2585.52	1909.51	2969.41
ENSG00000005961	ITGA2B	0.0989303	0.838191	0.941436	214.576	65.801	526.478	232.595	210.113	227.935	395.979	299.314	484.023	169.275	466.145	301.873	391.587	600.529	293.656
ENSG00000005981	ASB4	-1.12923	0.147593	0.419997	133.226	104.185	796.832	47.8482	232.695	434.385	179.202	136.409	35.8964	498.821	715.291	567.278	46.3262	735.43	228.952
ENSG00000006007	GDE1	0.549186	0.0137536	0.0959324	1024.54	1510.13	838.63	1451.4	1444.28	1035.98	999.099	723.26	1266.8	743.729	1379.35	1444.53	1228.08	1645.8	1207.47
ENSG00000006015	REX1BD	0.178419	0.668802	0.866357	1353.48	599.886	1054.74	2395.07	936.673	894.926	1663.88	1451.43	1043.31	886.893	793.652	614.889	804.152	670.155	515.64
ENSG00000006016	CRLF1	-0.180558	0.813163	0.930148	27.1168	77.8645	151.185	111.646	41.2372	56.0497	42.3919	117.763	41.6862	79.2351	8.03698	84.0787	50.6965	368.15	39.8177
ENSG00000006025	OSBPL7	-1.6518	NA	NA	615.433	269.784	3292.27	191.393	296.515	535.274	817.97	607.46	612.555	611.371	364.678	364.679	548.047	512.625	448.945
ENSG00000006042	TMEM98	1.35316	0.0722219	0.277968	267.631	185.339	34.6835	443.925	837.507	172.82	1454.81	1748.78	294.119	446.598	299.378	441.667	226.386	357.706	126.421
ENSG00000006047	YBX2	2.42082	0.00274299	0.0300888	127.331	17.5469	44.4661	10.6329	127.639	4.67081	180.165	98.1357	176.008	21.6096	328.512	72.9358	201.912	154.049	20.9043
ENSG00000006062	MAP3K14	-1.65153	0.00121068	0.0160347	240.514	141.472	1349.99	284.431	114.875	755.736	765.944	441.611	343.911	954.423	141.652	310.99	192.297	260.229	657.988
ENSG00000006071	ABCC8	1.4992	0.0168309	0.109696	1434.83	846.639	1622.12	9356.98	2220.92	486.698	1906.67	1059.87	4026.19	651.889	3296.17	1228.76	1833.82	2960	1048.2
ENSG00000006118	TMEM132A	0.628751	0.332759	0.642222	7894.52	4602.78	4437.71	1363.67	1434.46	1135.94	810.263	1148.19	3219.1	1080.48	5216	1799.08	6593.17	5225.47	1848.54
ENSG00000006125	AP2B1	0.447865	0.213898	0.511192	5082.63	4305.58	4122.01	2986.53	4876.79	3708.62	13742.7	5837.11	3785.34	3985.17	5263.22	3686.29	4583.67	5092.31	5224.09
ENSG00000006128	TAC1	-0.184281	0.924406	0.972739	1.17899	0	0	0	0	5.60497	2.89035	8.83221	0	0.900399	0	7.09098	0	1.74066	1583.75
ENSG00000006194	ZNF263	0.248672	0.508507	0.77558	885.422	1578.13	889.322	2424.31	1034.86	870.638	666.708	988.227	881.199	799.554	545.51	703.02	772.685	832.037	855.086
ENSG00000006210	CX3CL1	-1.17705	NA	NA	103.751	49.3507	123.616	53.1647	101.129	67.2596	69.3685	2412.18	282.54	607.769	107.495	83.0657	156.46	125.328	166.239
ENSG00000006282	SPATA20	1.35844	0.00211611	0.024698	1787.35	610.853	965.803	1131.08	2515.47	601.6	3623.54	2673.22	3965.98	862.582	1816.36	1346.27	2423.82	1866.86	1161.68
ENSG00000006283	CACNA1G	1.83502	NA	NA	11.7899	4.38673	4.44661	61.1394	6.87286	6.53913	1243.82	614.33	93.7939	66.6295	20.0925	51.6628	7.86671	194.954	4.97722
ENSG00000006327	TNFRSF12A	-2.45051	0.000244113	0.00468572	663.772	2250.39	2260.66	519.685	156.112	1525.49	148.372	430.816	427.283	4940.49	260.197	227.924	301.557	385.557	615.184
ENSG00000006377	DLX6	-2.96002	NA	NA	1.17899	13.1602	6.22525	1.32912	0.981837	3.73664	0	371.934	15.0533	170.175	5.02311	7.09098	18.3556	18.277	3.98177
ENSG00000006432	MAP3K9	1.53122	6.60734e-07	3.97825e-05	674.383	530.795	252.567	477.153	614.63	238.211	1452.88	469.089	591.712	190.885	701.227	602.733	673.04	583.122	508.671
ENSG00000006451	RALA	-0.601227	0.0170468	0.110702	483.386	650.333	637.644	393.419	456.554	885.585	695.612	679.099	376.334	695.108	432.992	560.187	380.224	410.796	329.492
ENSG00000006453	BAIAP2L1	1.07963	0.00455157	0.044292	760.449	296.104	435.768	778.862	1382.43	356.85	1357.5	602.553	1045.63	336.749	779.587	657.435	680.907	805.927	400.168
ENSG00000006459	KDM7A	1.33119	0.00351364	0.0364152	323.043	347.649	135.177	485.128	1059.4	212.989	314.085	614.33	365.912	236.805	953.387	515.615	367.113	383.816	157.28
ENSG00000006468	ETV1	2.91704	0.00116033	0.0154868	2837.83	1175.64	259.682	275.127	62.8376	88.7453	106.943	412.17	4057.45	236.805	1604.38	3562.71	1079.49	2189.75	317.546
ENSG00000006530	AGK	0.0936446	0.618684	0.840723	496.355	564.792	586.952	656.584	483.064	416.636	734.15	527.97	448.126	463.705	449.066	549.044	478.995	448.221	429.036
ENSG00000006534	ALDH3B1	1.82954	0.0380359	0.186695	361.95	49.3507	36.4622	38.5444	334.806	35.4981	65.5147	969.581	522.235	261.116	952.382	437.615	260.475	691.914	50.7676
ENSG00000006555	TTC22	0.77156	0.379341	0.679183	328.938	23.0303	11.5612	39.8735	326.952	301.734	358.404	158.98	446.968	148.566	333.535	20.2599	659.929	108.791	347.41
ENSG00000006576	PHTF2	0.120692	0.771768	0.914399	206.323	222.627	426.874	311.013	255.278	249.421	810.263	459.275	269.802	180.98	223.026	246.158	257.853	225.416	240.897
ENSG00000006606	CCL26	-0.133673	0.907789	0.967145	8.25293	8.77347	5.33593	0	17.6731	3.73664	4.81726	32.3848	217.694	17.1076	0	0	4.37039	6.09232	5.97266
ENSG00000006607	FARP2	-0.409993	0.0904653	0.318029	631.939	263.204	884.875	478.482	529.21	576.377	396.942	453.387	500.234	557.347	497.288	598.681	636.329	526.551	564.416
ENSG00000006611	USH1C	-4.97115	1.53474e-08	1.70221e-06	42.4437	6.5801	2198.4	10.6329	26.5096	316.681	10.598	11.7763	98.4257	81.9363	6.02774	5.06498	39.3335	53.9606	19.9089
ENSG00000006625	GGCT	0.177838	0.600834	0.830449	359.592	526.408	294.365	505.064	499.755	297.063	289.999	353.289	202.641	303.434	254.169	320.107	367.113	214.102	158.275
ENSG00000006634	DBF4	1.47798	7.66161e-08	6.63516e-06	73.0974	70.1877	17.7864	86.3926	60.8739	27.0907	109.833	71.6391	66.0031	34.2152	73.3374	74.9618	66.43	76.5892	51.763
ENSG00000006638	TBXA2R	0.764312	0.271116	0.580138	16.5059	7.67678	10.6719	6.64558	17.6731	9.34161	39.5015	84.3967	32.4226	36.016	27.1248	16.2079	55.0669	27.8506	48.7767
ENSG00000006652	IFRD1	0.120635	0.646097	0.855159	812.324	1187.71	606.517	1358.36	616.594	806.181	1302.59	959.767	956.466	1255.16	823.79	1106.19	792.789	871.202	816.263
ENSG00000006695	COX10	0.00845688	0.976717	0.991406	189.817	101.992	208.991	340.254	167.894	173.754	255.315	144.26	162.113	182.781	193.892	158.027	193.171	213.231	157.28
ENSG00000006704	GTF2IRD1	-0.552198	0.0708822	0.275144	1816.82	2031.06	3185.55	3371.97	948.455	2775.39	2240.99	1158.98	1830.72	2174.46	1634.52	2265.06	1416.88	1868.6	1611.62
ENSG00000006712	PAF1	-0.152927	0.590017	0.824329	2607.93	2355.68	2563.02	5767.04	2795.29	3299.46	2530.99	2059.87	2363.37	3056.85	2394.02	2267.09	2012.13	2192.37	2747.42
ENSG00000006715	VPS41	0.287522	0.202339	0.496442	1615.22	1472.85	1397.12	1628.17	1944.04	1648.79	3036.8	1585.87	1492.6	1189.43	1514.97	1307.78	1622.29	1711.07	1744.02
ENSG00000006740	ARHGAP44	0.418632	0.322673	0.633406	1930.01	827.996	482.012	693.799	2449.68	1500.26	875.777	978.413	1287.64	1270.46	2325.7	1319.93	1872.28	1867.73	960.603
ENSG00000006744	ELAC2	-1.24411	7.42077e-06	0.000291997	1045.76	558.212	3089.5	703.103	1204.71	2064.5	1565.61	1155.06	1195	2006.09	1060.88	674.656	1006.06	1043.53	876.985
ENSG00000006747	SCIN	3.84942	0.00019925	0.00403737	41.2647	246.754	9.78254	1701.27	268.042	32.6956	1034.75	1029.44	450.442	126.956	13.0601	3357.07	532.314	1004.36	90.5853
ENSG00000006756	ARSD	1.72066	0.0397789	0.192216	180.386	149.149	20.4544	427.976	38.2916	58.8522	33.7208	650.64	364.754	145.865	395.821	19.2469	369.735	64.4045	274.742
ENSG00000006757	PNPLA4	0.123505	0.807975	0.928114	753.375	1004.56	748.809	2684.82	743.251	622.151	680.197	368.99	356.648	836.47	856.943	383.926	701.011	583.122	504.69
ENSG00000006831	ADIPOR2	0.706062	0.0547086	0.236691	1775.56	2673.71	1820.44	7153.31	3284.25	2361.56	4461.74	2520.13	2231.37	1684.65	2209.16	4019.57	2030.48	3355.13	2569.24
ENSG00000006837	CDKL3	0.282307	0.406832	0.700884	23.5798	66.8977	40.9088	83.7343	37.3098	43.9056	51.0629	39.2543	41.6862	36.016	45.208	60.7798	36.7113	61.7935	40.8132
ENSG00000007001	UPP2	-1.08106	0.145151	0.415949	75.4554	52.6408	83.5962	43.8608	23.5641	56.0497	0	10.7949	23.159	37.8167	26.1202	25.3249	21.852	13.9253	19.9089
ENSG00000007047	MARK4	0.110414	0.750326	0.90442	1694.21	2625.46	1617.68	1109.81	1644.58	1161.16	626.243	1005.89	1025.94	1180.42	1767.13	1122.4	2041.85	1327.26	1105.94
ENSG00000007062	PROM1	-4.22698	0.000765915	0.0113045	0	2.19337	316.598	9.30382	27.4914	540.879	2.89035	139.353	12.7374	153.068	0	8.10397	3.49631	6.09232	3.98177
ENSG00000007080	CCDC124	-0.118334	0.59349	0.826568	2043.19	1560.58	1477.16	2438.93	1353.95	1628.24	1739.03	1714.43	1258.69	1966.47	1204.54	1311.83	1366.18	1349.88	1352.81
ENSG00000007168	PAFAH1B1	0.139132	0.469939	0.748417	4010.93	4025.92	4092.66	3519.5	4505.65	4216.8	6527.38	4099.13	3515.53	3563.78	5023.11	3629.57	5059.17	4738.96	3642.33
ENSG00000007171	NOS2	-0.673123	0.414416	0.707518	4.71596	5.48342	27.569	5.31647	25.5278	5.60497	4.81726	592.74	8.10565	40.5179	64.2958	15.1949	20.1038	5.22199	11.9453
ENSG00000007174	DNAH9	1.92274	2.77028e-05	0.000857115	356.055	98.7015	54.2486	556.9	470.3	138.256	375.746	287.538	288.329	81.9363	352.623	382.913	106.638	494.348	391.209
ENSG00000007202	KIAA0100	0.0675896	0.899222	0.964889	2381.56	2026.67	4536.43	1612.22	3278.35	3332.15	13953.7	5113.85	2871.71	3106.38	2788.83	2075.63	2497.24	3106.21	4298.32
ENSG00000007237	GAS7	-0.946055	NA	NA	90.7823	137.085	43.5768	112.975	16.6912	28.0248	28.9035	1764.48	419.178	506.024	12.0555	47.6108	72.5485	51.3496	131.399
ENSG00000007255	TRAPPC6A	0.240659	0.472549	0.750186	458.627	1143.84	357.507	1057.98	562.593	610.007	865.179	514.231	587.08	718.518	702.231	634.136	580.388	382.076	481.795
ENSG00000007264	MATK	0.473616	0.536764	0.793597	833.546	838.963	146.738	63.7976	73.6378	135.453	95.3817	151.129	181.798	331.347	242.114	282.626	476.373	120.106	48.7767
ENSG00000007312	CD79B	0.446243	0.610507	0.836019	3.53697	8.77347	15.1185	17.2785	563.575	6.53913	4.81726	100.098	18.5272	31.514	36.1664	7.09098	11.363	53.0902	11.9453
ENSG00000007314	SCN4A	0.399381	0.688182	0.875085	3.53697	3.29005	12.4505	7.9747	109.966	12.1441	12.5249	168.793	38.2123	65.7291	23.1063	7.09098	33.215	22.6286	45.7904
ENSG00000007341	ST7L	0.0927271	0.700553	0.880555	370.203	288.428	252.567	280.444	431.026	316.681	397.905	273.799	272.118	297.132	197.911	212.729	392.461	269.803	307.592
ENSG00000007350	TKTL1	3.48511	0.000456954	0.00769679	12.9689	18.6436	2.66796	1475.32	183.604	4.67081	12.5249	17.6644	8.10565	10.8048	45.208	239.067	18.3556	36.5539	181.171
ENSG00000007372	PAX6	1.01354	0.0298693	0.160808	216.934	307.071	110.276	174.114	79.5288	127.98	155.116	114.819	143.586	45.9203	291.341	268.444	291.942	188.862	62.7129
ENSG00000007376	RPUSD1	-0.766091	0.00176525	0.0214201	364.308	415.643	726.576	483.798	376.044	610.007	283.255	360.158	336.963	443.897	209.966	231.976	408.195	335.078	384.241
ENSG00000007384	RHBDF1	-1.00749	0.188906	0.478284	29.4748	28.5138	53.3593	25.2532	31.4188	18.6832	24.0863	761.533	259.381	316.94	46.2126	55.7148	78.6671	75.7188	68.6856
ENSG00000007392	LUC7L	-0.229847	0.596561	0.828104	2222.4	1527.68	3670.23	3781.34	2205.21	2317.65	668.635	1421.01	3299	1980.88	1466.75	4402.48	2450.04	1621.43	2116.31
ENSG00000007402	CACNA2D2	4.0826	2.72341e-08	2.69022e-06	7445.33	4087.34	313.931	679.179	2153.17	150.4	630.097	996.078	3107.94	188.183	6302	4913.03	9384.11	4033.99	490.754
ENSG00000007516	BAIAP3	0.558583	0.344938	0.652188	24368.6	27845.9	2695.53	29190.1	13985.3	30267.8	6304.83	5705.61	26975.6	15756.1	23908	46288.9	25860.5	21765.3	34820.6
ENSG00000007520	TSR3	-0.630562	0.0258978	0.146184	874.811	1061.59	1282.4	1492.6	1103.58	1338.65	702.356	810.601	690.138	1230.85	590.718	503.459	730.73	649.267	745.587
ENSG00000007541	PIGQ	-0.35995	0.508145	0.775465	1071.7	1969.64	3410.55	7161.28	1494.36	2131.76	678.27	1107.95	1814.51	1707.16	1413.5	1654.22	1193.99	1349.01	1689.27
ENSG00000007545	CRAMP1	-0.410858	0.0790932	0.293673	527.009	696.394	1125.88	793.483	887.581	903.334	419.101	664.379	815.196	669.897	661.042	747.592	712.374	479.553	718.71
ENSG00000007866	TEAD3	0.954144	0.297849	0.607682	4.71596	13.1602	12.4505	41.2026	121.748	34.564	31.7939	392.543	132.006	118.853	97.4484	20.2599	186.179	160.141	83.6172
ENSG00000007908	SELE	-0.270475	NA	NA	0	6.5801	1.77864	2.65823	0.981837	2.80248	2.89035	1006.87	10.4215	27.012	5.02311	3.03899	0.874078	2.61099	65.6993
ENSG00000007923	DNAJC11	-0.214038	0.331517	0.641194	657.877	542.858	875.982	735.002	544.92	700.621	1010.66	601.572	499.076	635.682	570.626	525.745	621.47	528.291	791.377
ENSG00000007933	FMO3	-1.36916	NA	NA	0	4.38673	7.11457	6.64558	56.9466	5.60497	6.74416	528.952	28.9487	177.379	18.0832	32.4159	47.2002	60.9232	7.96355
ENSG00000007944	MYLIP	1.12158	0.00675114	0.0582815	1118.86	1659.28	636.754	2092.03	2150.22	545.55	875.777	1155.06	492.128	650.088	2179.03	562.213	1034.03	1633.61	996.439
ENSG00000007952	NOX1	1.40711	0.0662342	0.265001	15.3269	1.09668	3.55729	7.9747	9.81837	5.60497	5.78071	6.8695	20.8431	5.40239	22.1017	20.2599	24.4742	16.5363	2.98633
ENSG00000007968	E2F2	1.34454	0.0733833	0.280832	31.8327	17.5469	23.1224	6.64558	42.219	3.73664	68.405	26.4966	16.2113	10.8048	38.1757	15.1949	95.2746	12.1846	11.9453
ENSG00000008018	PSMB1	0.10364	0.805423	0.927202	3446.19	6768.73	1942.28	3132.73	1428.57	2795.94	1945.21	1742.89	2109.78	2566.14	2365.89	2745.22	1078.61	2350.77	2280.56
ENSG00000008056	SYN1	-0.301094	0.311825	0.622111	3987.35	2629.85	3086.84	2227.6	1629.85	2669.83	2538.69	1006.87	1943.04	2491.4	2784.81	1961.16	2083.8	2010.47	1975.95
ENSG00000008083	JARID2	0.420579	0.215345	0.513095	608.359	720.521	481.123	408.039	678.449	428.78	292.889	450.443	371.702	358.359	537.473	665.539	916.034	829.426	309.583
ENSG00000008086	CDKL5	-0.0222645	0.973575	0.990484	7.07394	115.152	153.853	280.444	165.93	185.898	349.733	253.19	46.318	159.371	177.818	64.8318	113.63	128.809	262.797
ENSG00000008118	CAMK1G	-0.0413576	0.967798	0.988362	422.079	6.5801	59.5845	11.962	80.5106	110.231	7.70761	24.5339	56.7395	90.9403	102.471	10.13	6.99263	142.734	141.353
ENSG00000008128	CDK11A	-0.218079	0.50043	0.769871	174.491	275.267	638.533	423.988	359.352	329.759	363.221	400.394	642.662	315.14	385.775	292.756	435.291	282.858	378.268
ENSG00000008130	NADK	0.412992	0.118379	0.371881	1614.04	1278.73	1406.02	1007.47	1807.56	1075.22	2789.19	1993.14	1866.61	1166.92	1140.25	1547.86	1593.45	1500.45	1289.1
ENSG00000008226	DLEC1	0.857055	0.393275	0.689591	10.6109	9.87015	66.6991	74.4305	232.695	18.6832	21.1959	288.519	18.5272	19.8088	14.0647	21.2729	9.61486	30.4616	816.263
ENSG00000008256	CYTH3	-0.753875	0.150027	0.422294	550.589	214.95	1918.27	1343.74	554.738	816.457	757.273	1855.75	838.355	970.63	379.747	456.861	850.478	679.729	307.592
ENSG00000008277	ADAM22	0.405815	0.234666	0.537587	1772.02	531.891	1330.43	1543.1	1467.85	789.366	1137.84	923.457	1327.01	869.785	1378.34	1411.1	1257.8	2279.4	813.277
ENSG00000008282	SYPL1	0.285333	0.518665	0.781204	1571.59	2335.94	1325.09	1326.46	3554.25	961.252	840.13	1731.11	1520.39	2018.69	3305.21	844.839	1931.71	1068.77	955.625
ENSG00000008283	CYB561	-0.120124	0.743429	0.900835	5212.32	8556.32	6236.81	3439.75	7223.38	7406.96	13235.9	5784.12	5451.63	6053.38	5825.81	5603.9	4215.68	5216.77	2727.51
ENSG00000008294	SPAG9	0.424712	0.252501	0.558738	2936.87	2265.75	2892.07	2910.77	2002.95	2170.99	7221.07	4173.71	2620.44	1778.29	1781.2	1890.25	2594.26	3456.96	2877.83
ENSG00000008300	CELSR3	-0.379568	0.213533	0.510702	1987.78	1839.14	4682.28	2896.15	1644.58	2979.97	4341.31	1741.91	2893.72	2383.36	2447.26	2449.43	2199.18	2741.54	3705.04
ENSG00000008311	AASS	1.49964	0.00507533	0.0477057	141.479	167.793	116.501	1112.47	280.805	127.98	571.327	402.356	452.758	157.57	284.308	117.508	257.853	436.906	323.519
ENSG00000008323	PLEKHG6	2.68684	0.00105838	0.0144101	211.039	14.2569	16.0078	15.9494	594.993	29.8932	156.079	114.819	318.436	49.5219	312.438	30.3899	145.097	227.157	316.551
ENSG00000008324	SS18L2	-0.0833941	0.730976	0.894959	297.106	346.552	315.709	381.456	608.739	439.99	340.098	321.885	297.593	345.753	391.803	251.223	265.72	319.412	336.46
ENSG00000008382	MPND	-0.123529	0.677864	0.870438	477.491	267.591	433.989	445.254	488.955	420.373	581.925	347.4	295.277	355.658	225.035	207.664	306.802	376.854	423.063
ENSG00000008394	MGST1	2.28064	0.0274261	0.152317	29.4748	7.67678	0.889322	103.671	108.984	4.67081	73.2223	118.744	23.159	23.4104	6.02774	11.143	1.74816	63.5342	15.9271
ENSG00000008405	CRY1	0.494469	0.201448	0.495117	634.297	1447.62	682.999	669.875	468.336	256.894	624.316	453.387	685.506	526.733	1006.63	500.42	882.819	485.645	407.136
ENSG00000008438	PGLYRP1	0.673429	0.349076	0.655373	8.25293	9.87015	16.0078	37.2153	2.94551	6.53913	14.4518	39.2543	13.8954	4.50199	12.0555	9.11697	8.74078	7.83298	9.95443
ENSG00000008441	NFIX	-2.07153	0.0739732	0.282253	61.3075	91.0247	4982.87	51.8355	130.584	94.3503	73.2223	3470.08	496.76	1030.96	79.3652	210.703	137.23	929.514	80.6309
ENSG00000008513	ST3GAL1	2.94997	6.09381e-07	3.70433e-05	2764.73	370.679	124.505	1165.64	3257.74	117.704	1698.56	1960.75	911.306	457.403	1129.2	1455.68	957.99	4608.41	1343.85
ENSG00000008516	MMP25	-0.446351	0.452221	0.73665	42.4437	76.7678	160.078	894.496	31.4188	48.5764	7.70761	125.614	83.3724	43.2191	41.1895	43.5589	51.5706	109.662	63.7084
ENSG00000008517	IL32	-0.223119	0.781404	0.9172	16.5059	27.4171	80.0389	192.722	33.3825	56.0497	16.3787	371.934	106.531	185.482	57.2635	30.3899	117.127	53.9606	78.64
ENSG00000008710	PKD1	-0.95061	0.0180709	0.114809	13412.2	12813.6	55535.5	32742.8	11570	25809.9	9497.7	9993.16	25757.4	17296.7	15424	23254.4	13592.8	17470.2	18628.7
ENSG00000008735	MAPK8IP2	-0.771401	0.0287963	0.157075	5602.56	3667.31	7748.66	3110.13	5634.76	8700.78	2466.44	1413.15	5771.22	6273.08	5642.96	4184.69	5431.52	4917.37	5405.26
ENSG00000008838	MED24	0.0413346	0.891685	0.962368	2227.11	1884.1	3360.75	2498.74	1850.76	2047.68	5368.35	2642.79	2501.17	1935.86	2015.27	2071.58	2289.21	2194.98	2686.7
ENSG00000008853	RHOBTB2	0.980866	0.0686387	0.269636	2059.7	2152.79	653.651	215.317	602.848	762.276	539.533	682.043	996.994	688.805	1616.44	2189.09	2158.97	1890.36	1511.08
ENSG00000008869	HEATR5B	0.108411	0.69567	0.878794	834.725	705.167	986.258	344.241	767.797	688.477	953.817	818.452	966.888	588.861	978.502	638.188	1087.35	906.015	757.532
ENSG00000008952	SEC62	0.280302	0.0917103	0.319761	5419.82	6806.02	3949.48	5535.77	6632.31	5246.25	4570.61	4501.49	6424.3	5057.54	7119.76	4889.73	5823.98	5579.7	5935.83
ENSG00000008988	RPS20	-0.142595	0.661599	0.862635	10639.2	24450.6	7869.61	10735.3	9792.84	15902.2	8726.94	13621.2	10408.8	15425.6	11107.1	14957.9	7809.89	8348.22	11436.6
ENSG00000009307	CSDE1	0.21296	0.306422	0.616616	10648.6	8625.41	10366.8	9570.97	15677	10679.3	17810.4	13096.2	10146	10619.3	14324.9	10166.4	12284.3	12608.5	11846.8
ENSG00000009335	UBE3C	0.0029358	0.992694	0.996032	886.601	1067.07	1414.91	2223.61	1120.28	1149.02	2107.07	1476.94	886.989	1125.5	799.68	1036.3	832.997	1208.02	1143.76
ENSG00000009413	REV3L	-0.317231	0.290567	0.599923	769.881	1264.48	1309.97	716.394	524.301	759.473	585.778	620.218	655.399	813.96	1010.65	767.851	444.906	873.813	1024.31
ENSG00000009694	TENM1	1.90018	NA	NA	1286.28	466.09	780.824	1177.6	1245.95	14.0124	641.659	368.009	1167.21	10.8048	992.567	886.372	1331.22	1329.87	1136.8
ENSG00000009724	MASP2	0.134971	0.715895	0.886851	50.6966	31.8038	78.2603	77.0888	49.0919	53.2472	52.0264	45.1424	61.3713	36.9164	56.2589	115.482	76.0448	43.5166	81.6263
ENSG00000009780	FAM76A	-0.62259	0.0609013	0.252195	264.094	223.723	633.197	151.519	596.957	495.105	244.717	301.277	274.434	341.251	428.974	295.795	349.631	375.983	308.587
ENSG00000009790	TRAF3IP3	-0.644815	0.377869	0.678363	5.89495	4.38673	32.0156	14.6203	11.782	18.6832	6.74416	65.7509	18.5272	27.9124	14.0647	4.05199	13.1112	13.055	28.8679
ENSG00000009830	POMT2	0.3116	0.447169	0.732637	763.986	744.648	1627.46	2812.41	1458.03	885.585	2321.92	1072.62	1441.65	666.295	1031.75	1196.35	826.878	1089.66	1025.31
ENSG00000009844	VTA1	-0.620227	0.0849441	0.306865	529.367	1161.39	817.287	408.039	334.806	800.576	714.881	552.504	365.912	783.347	431.988	446.732	269.216	401.223	633.102
ENSG00000009950	MLXIPL	0.962619	0.166125	0.445678	265.273	94.3147	369.958	1047.34	404.517	59.7863	245.68	190.383	405.282	69.3307	124.573	134.729	486.862	406.445	86.6036
ENSG00000009954	BAZ1B	0.417275	0.184685	0.473088	2631.51	2482.89	2788.02	4929.69	3244.97	2851.99	3973.27	2499.52	2722.34	2423.87	5861.97	6186.37	2614.37	3040.07	2887.78
ENSG00000010017	RANBP9	-0.147179	0.622979	0.842789	1156.59	2364.45	1412.24	731.014	1505.16	1788.92	809.299	1142.3	1058.37	1193.03	1234.68	1283.47	1686.97	1348.14	1549.91
ENSG00000010030	ETV7	-0.660957	0.231897	0.534082	71.9184	86.638	89.8215	71.7723	111.929	303.602	60.6974	55.9374	47.4759	104.446	67.3097	137.768	62.0596	214.102	270.761
ENSG00000010072	SPRTN	0.210068	0.496481	0.767172	206.323	185.339	205.433	292.406	232.695	198.976	370.929	222.768	144.744	139.562	138.638	151.949	158.208	255.877	157.28
ENSG00000010165	METTL13	-0.357128	0.141627	0.410343	587.137	743.551	946.238	523.672	750.124	943.503	912.388	753.682	597.502	821.164	747.439	351.51	770.937	887.738	837.168
ENSG00000010219	DYRK4	0.45609	0.0742266	0.282757	583.6	586.725	261.461	4669.19	666.667	454.936	378.636	298.333	464.338	387.171	567.612	591.59	339.142	530.902	548.489
ENSG00000010244	ZNF207	0.0660074	0.735148	0.897036	2514.79	2111.12	2828.04	2603.74	2580.27	2257.87	4041.68	2613.35	2372.64	2176.26	2192.09	2612.52	1982.41	2199.33	2585.17
ENSG00000010256	UQCRC1	-0.286813	0.0449095	0.209207	4991.85	3415.07	4933.07	3611.21	3742.76	4396.16	3984.83	2813.55	3679.96	4706.38	4043.61	3789.62	4128.27	3692.82	4128.1
ENSG00000010270	STARD3NL	0.265283	0.226288	0.527069	1487.89	1128.49	803.947	1392.91	1244.97	916.412	1252.49	942.103	788.563	1011.15	1159.33	1156.84	759.574	1013.94	807.304
ENSG00000010278	CD9	-0.72043	0.267045	0.574429	176.849	155.729	141.402	256.52	540.992	193.371	192.69	4463.21	819.828	1738.67	469.159	236.028	423.054	669.285	685.86
ENSG00000010282	HHATL	1.28944	0.211147	0.508315	1526.79	729.294	136.066	30.5697	554.738	52.313	19.269	133.465	1043.31	668.996	1429.58	201.586	1219.34	1463.03	31.8542
ENSG00000010292	NCAPD2	0.269784	0.353657	0.658602	623.686	769.872	579.838	402.722	688.268	657.649	1456.74	843.967	602.134	566.351	574.644	756.708	645.944	712.802	619.166
ENSG00000010295	IFFO1	-0.668331	0.0340832	0.174756	648.445	694.2	2067.67	1612.22	814.925	1182.65	743.784	882.24	905.516	837.371	567.612	960.321	731.604	677.118	1053.18
ENSG00000010310	GIPR	1.53595	0.227606	0.528951	1.17899	76.7678	19.5651	6.64558	13.7457	3.73664	344.916	220.805	10.4215	38.7171	5.02311	7.09098	8.74078	13.9253	9.95443
ENSG00000010318	PHF7	0.704357	0.00285909	0.0310215	224.008	180.953	139.623	287.089	215.022	137.322	332.391	167.812	166.745	153.068	277.276	222.859	291.068	250.655	186.148
ENSG00000010319	SEMA3G	-0.795213	NA	NA	33.0117	23.0303	110.276	69.1141	119.784	92.482	66.4781	1289.5	710.981	572.654	104.481	68.8838	85.6597	248.044	143.344
ENSG00000010322	NISCH	1.0023	0.0317965	0.16732	13541.9	4429.5	9965.74	6993.81	20755.1	9862.87	26730	11821.4	29200	6512.58	25186.9	22948.4	24972.4	14640.7	9844.93
ENSG00000010327	STAB1	0.0740647	0.909767	0.967839	528.188	1522.2	972.028	431.963	884.635	553.023	376.709	4744.86	1582.92	1724.26	469.159	811.41	852.226	684.081	793.368
ENSG00000010361	FUZ	0.15843	0.514332	0.778364	1071.7	819.222	923.116	866.584	1037.8	979.001	773.651	651.621	1171.84	774.343	1184.45	1135.57	1536.63	1004.36	693.824
ENSG00000010379	SLC6A13	0.865313	0.29046	0.599875	3.53697	8.77347	11.5612	221.962	8.83653	4.67081	35.6477	26.4966	5.78975	1.8008	8.03698	4.05199	12.2371	6.96265	3.98177
ENSG00000010404	IDS	0.233773	0.435811	0.72334	9962.47	10007.2	8886.99	20944.2	10099.2	9031.47	10557.5	5904.83	6838.85	9442.48	10042.2	10717.5	9367.5	9412.64	14844
ENSG00000010438	PRSS3	0.833406	0.572777	0.814633	3.53697	10.9668	0	1.32912	0	1.86832	13.4883	117.763	1.15795	3.6016	0	2.02599	0	3.48133	0.995443
ENSG00000010539	ZNF200	-0.080462	0.790262	0.921403	128.51	186.436	172.528	320.317	131.566	176.556	90.5644	172.719	137.796	155.769	113.522	161.066	155.586	151.438	163.253
ENSG00000010610	CD4	1.10623	0.0488903	0.220683	736.869	410.159	366.4	357.532	799.215	299.866	1464.45	1012.76	1704.5	858.98	1834.44	2142.49	1600.44	797.224	273.747
ENSG00000010626	LRRC23	0.483675	0.0717973	0.277068	457.448	339.972	217.884	586.14	490.919	391.414	441.261	409.226	529.183	446.598	626.884	668.578	402.95	626.639	326.505
ENSG00000010671	BTK	0.150566	0.762871	0.910433	24.7588	41.674	26.6796	53.1647	18.6549	25.2224	7.70761	53.9746	22.001	34.2152	38.1757	19.2469	50.6965	20.0176	32.8496
ENSG00000010704	HFE	-0.837199	0.368276	0.67064	5.89495	31.8038	21.3437	22.595	10.8002	34.564	29.867	207.066	40.5282	128.757	8.03698	11.143	12.2371	10.444	22.8952
ENSG00000010803	SCMH1	-0.19048	0.337784	0.646654	1634.08	926.697	1737.73	1662.72	1711.34	1702.98	1840.19	1226.7	1100.05	1632.42	1385.37	1506.33	1485.06	1484.79	1818.67
ENSG00000010810	FYN	-0.184006	0.612288	0.837351	1757.87	1616.51	972.918	873.23	487.973	1286.34	646.476	1645.74	964.572	1318.18	864.98	1021.1	618.848	1250.67	849.113
ENSG00000010818	HIVEP2	-0.105309	0.79914	0.924713	1525.61	1081.33	930.23	397.406	474.227	654.847	391.161	685.969	492.128	717.618	797.67	472.056	403.824	1108.8	732.646
ENSG00000011007	ELOA	-0.738552	7.44974e-05	0.00187142	891.317	1055.01	1730.62	875.888	1357.88	1810.4	1289.1	869.482	796.669	1440.64	944.345	760.76	966.731	1097.49	1035.26
ENSG00000011009	LYPLA2	-0.678511	0.00262732	0.0291573	791.103	895.99	1284.18	699.115	1022.09	1934.65	1107.01	963.693	871.936	1631.52	1208.56	863.073	1005.19	1584.87	1104.94
ENSG00000011021	CLCN6	0.400055	0.186782	0.475667	1529.15	806.062	1469.16	898.483	949.437	926.688	1625.34	1102.06	1938.41	944.518	1495.88	2133.37	1802.35	1731.09	1618.59
ENSG00000011028	MRC2	-2.51095	NA	NA	45.9806	244.56	178.754	103.671	100.147	159.742	93.4548	7336.63	860.356	4212.07	157.726	136.755	520.951	218.453	468.854
ENSG00000011052	NME1-NME2	-0.360221	0.518606	0.781204	38.9067	33.9972	44.4661	33.2279	34.3643	15.8807	7.70761	11.7763	11.5795	34.2152	44.2034	24.3119	8.74078	27.8506	18.9134
ENSG00000011083	SLC6A7	2.99195	0.0170991	0.110915	193.354	3.29005	3.55729	1.32912	4.90919	0.934161	1.9269	12.7576	9.26359	6.30279	16.074	5.06498	144.223	120.976	14.9316
ENSG00000011105	TSPAN9	0.460479	0.460095	0.741638	310.075	134.892	174.307	175.443	345.607	131.717	368.038	1464.18	547.71	574.454	251.156	200.573	478.121	370.761	199.089
ENSG00000011114	BTBD7	-0.261812	0.422747	0.7146	406.752	528.601	974.696	731.014	485.028	704.358	1211.06	915.606	488.655	654.59	398.835	666.552	519.203	580.511	853.095
ENSG00000011132	APBA3	0.134989	0.414752	0.707796	521.114	468.284	422.428	505.064	488.955	379.269	460.53	407.263	563.921	424.088	453.085	335.302	416.061	345.522	424.059
ENSG00000011143	MKS1	-0.00533634	0.975166	0.990882	475.133	462.8	581.616	566.204	453.609	590.39	775.578	492.641	528.025	430.391	536.468	564.239	519.203	498.7	512.653
ENSG00000011198	ABHD5	-0.518739	0.0395219	0.191266	96.6772	120.635	216.105	162.152	246.441	215.791	201.361	152.11	126.216	249.41	178.823	138.781	131.986	151.438	194.111
ENSG00000011201	ANOS1	2.54852	0.00337501	0.0353453	247.588	176.566	5.33593	17.2785	124.693	14.9466	7.70761	151.129	99.5836	26.1116	23.1063	10.13	79.5411	117.495	30.8587
ENSG00000011243	AKAP8L	-0.56476	0.117431	0.370212	2049.09	2509.21	6721.49	4209.31	2161.02	2695.99	1770.82	1546.62	3468.06	2626.46	3591.53	4179.62	2104.78	2230.66	2751.41
ENSG00000011258	MBTD1	0.34254	0.331407	0.641098	294.748	296.104	338.832	256.52	280.805	321.351	851.691	575.075	379.807	276.422	250.151	430.524	367.113	290.691	475.822
ENSG00000011260	UTP18	0.220046	0.466601	0.745728	903.107	1619.8	903.551	836.014	851.253	973.396	2149.46	897.942	760.773	861.682	1028.73	888.398	917.782	830.296	1075.08
ENSG00000011275	RNF216	0.381767	0.180313	0.466855	1612.86	1912.62	1541.19	3714.88	1891.02	1380.69	1820.92	1361.14	1197.32	1379.41	1667.67	2274.18	1423.87	2021.78	1522.03
ENSG00000011295	TTC19	0.180144	0.236251	0.539262	1786.17	1840.23	1475.38	1365	1951.89	1501.2	1641.72	1359.18	1756.61	1306.48	1921.84	1414.14	1557.61	1493.49	1322.94
ENSG00000011304	PTBP1	-0.321143	0.218607	0.517616	4451.87	4149.85	7407.16	8061.09	4492.89	5483.53	6249.91	5142.31	4062.09	5575.27	2673.3	5247.32	4055.72	4712.85	5826.33
ENSG00000011332	DPF1	2.66391	1.49825e-05	0.000524276	462.164	1184.42	108.497	217.975	176.731	56.0497	1108.93	466.145	317.278	45.0199	216.998	493.329	187.927	355.966	125.426
ENSG00000011347	SYT7	4.10236	6.25778e-06	0.000252521	1038.69	322.425	73.8137	152.848	6501.73	68.1938	790.03	464.182	758.457	103.546	2150.9	112.443	1984.16	2440.41	154.294
ENSG00000011376	LARS2	0.189073	0.504017	0.772794	409.11	289.524	467.783	305.697	495.828	354.047	836.276	427.872	398.335	394.375	584.69	354.549	478.995	425.592	537.539
ENSG00000011405	PIK3C2A	0.0520627	0.879286	0.957672	459.806	370.679	715.904	527.659	621.503	579.18	1231.29	1242.4	616.029	626.678	491.26	494.342	604.862	642.305	665.952
ENSG00000011422	PLAUR	-0.308802	0.630358	0.847442	21.2218	23.0303	25.7903	27.9114	18.6549	13.0783	22.1594	420.021	30.1067	81.0359	17.0786	22.2859	47.2002	17.4066	114.476
ENSG00000011426	ANLN	0.663282	0.323576	0.634245	69.5604	77.8645	56.9166	39.8735	24.5459	20.5515	200.398	62.8069	22.001	40.5179	59.2727	50.6498	104.015	25.2396	10.9499
ENSG00000011451	WIZ	0.0401832	0.879561	0.95772	995.068	894.893	1369.56	1612.22	1055.47	844.482	1773.71	1228.66	1012.05	964.327	988.549	764.812	952.746	1007.84	788.391
ENSG00000011454	RABGAP1	-0.109364	0.59021	0.824383	1181.35	1921.39	1778.64	1577.66	1011.29	1558.18	2060.82	1708.54	1171.84	1593.71	1414.51	1663.34	1572.47	1425.6	1572.8
ENSG00000011465	DCN	-3.97134	NA	NA	31.8327	95.4114	28.4583	91.709	26.5096	101.824	53.9533	15675.2	1740.4	9674.78	54.2496	19.2469	43.7039	92.2551	170.221
ENSG00000011478	QPCTL	0.171818	0.574122	0.81558	341.907	511.054	373.515	215.317	460.482	200.845	464.384	338.568	419.178	334.048	232.068	232.989	342.639	288.95	245.874
ENSG00000011485	PPP5C	0.271152	0.327476	0.637605	3004.07	2548.69	2917.86	3526.15	2289.64	3033.22	6525.46	2850.84	2483.8	2166.36	3086.2	3376.32	2773.45	3033.11	3685.13
ENSG00000011523	CEP68	0.213959	0.493703	0.764873	639.013	452.93	511.36	268.482	552.774	502.579	818.934	1136.41	536.131	599.666	639.945	583.486	740.344	619.676	495.731
ENSG00000011566	MAP4K3	0.297407	0.189689	0.479429	680.278	636.076	875.982	810.761	931.763	640.835	571.327	783.123	959.94	485.315	968.456	966.399	979.842	931.255	622.152
ENSG00000011590	ZBTB32	0.940165	0.0922571	0.320525	23.5798	25.2237	12.4505	22.595	8.83653	5.60497	20.2325	8.83221	12.7374	15.3068	23.1063	26.3379	46.3262	9.57365	28.8679
ENSG00000011600	TYROBP	-0.898839	0.173903	0.457455	126.152	813.739	211.659	190.064	96.22	236.343	53.9533	331.699	182.956	707.713	79.3652	134.729	121.497	130.55	218.998
ENSG00000011638	TMEM159	-0.278065	0.660867	0.862258	334.833	101.992	61.3632	570.191	145.312	482.027	60.6974	444.555	151.691	514.128	158.73	381.9	462.387	238.471	437.995
ENSG00000011677	GABRA3	-1.82561	0.161652	0.439997	7.07394	5.48342	1.77864	3.98735	11.782	308.273	1643.65	402.356	9.26359	256.614	5.02311	73.9488	4.37039	62.6639	4.97722
ENSG00000012048	BRCA1	4.00177	6.67529e-07	4.00644e-05	412.647	141.472	97.8254	1240.07	3945.02	99.0211	5816.36	1941.12	866.146	92.7411	855.938	1782.87	367.113	903.404	283.701
ENSG00000012061	ERCC1	-0.0488596	0.820906	0.934532	1158.95	1473.94	1317.97	2017.6	1167.4	1209.74	1233.22	1059.87	1168.37	1202.03	1078.96	863.073	1139.8	1050.49	1015.35
ENSG00000012124	CD22	-0.60765	0.630372	0.847442	5.89495	0	26.6796	1.32912	0	2.80248	7.70761	39.2543	19.6851	16.2072	0	9.11697	9.61486	4.35166	22.8952
ENSG00000012171	SEMA3B	0.201343	0.786035	0.919561	198.07	39.4806	201.876	71.7723	80.5106	61.6546	145.481	480.865	618.345	188.183	77.3559	93.1957	80.4152	142.734	49.7722
ENSG00000012174	MBTPS2	0.356295	0.302221	0.61245	346.623	965.081	498.909	853.293	470.3	554.892	934.548	484.79	411.072	417.785	516.376	327.198	798.034	614.454	813.277
ENSG00000012211	PRICKLE3	0.542852	0.36364	0.666404	63.6655	32.9005	100.493	328.292	270.005	103.692	313.122	194.309	123.901	101.745	89.4114	43.5589	83.0375	123.587	117.462
ENSG00000012223	LTF	4.06519	8.02592e-05	0.00199501	505.787	19.7403	24.901	26.5823	1306.83	25.2224	1225.51	2923.46	545.394	62.1275	304.401	302.886	110.134	182.77	62.7129
ENSG00000012232	EXTL3	-0.175724	0.54836	0.799537	1372.34	1865.46	1705.72	1620.19	666.667	1811.34	1665.81	1578.02	1352.48	1769.28	1197.51	2705.71	1242.07	1730.22	1724.11
ENSG00000012660	ELOVL5	-1.4704	0.000350033	0.00624527	930.224	3291.15	4209.16	1901.97	834.562	4107.51	991.391	1283.62	917.096	2662.48	946.354	731.384	939.634	1262.85	1819.67
ENSG00000012779	ALOX5	0.514427	0.399128	0.694674	74.2764	119.538	36.4622	55.8229	60.8739	47.6422	137.774	239.451	113.479	92.7411	30.1387	24.3119	61.1855	26.9803	66.6947
ENSG00000012817	KDM5D	2.60737	0.0739112	0.282109	16.5059	18.6436	49.802	42.5317	2096.22	36.4323	24.0863	56.9187	2.3159	9.90439	12.0555	2446.39	7.86671	7.83298	2803.17
ENSG00000012822	CALCOCO1	0.442557	0.0142319	0.0977977	4063.98	3519.26	3756.49	5511.85	3621.02	3311.6	5497.45	3858.7	5743.43	2811.04	4661.45	4897.84	4202.57	4161.93	3966.84
ENSG00000012963	UBR7	-0.021404	0.943321	0.979454	847.694	1036.37	781.714	926.394	783.506	916.412	1812.25	1102.06	524.551	1021.05	669.079	728.345	783.174	745.004	757.532
ENSG00000012983	MAP4K5	0.328564	0.131003	0.393344	899.57	1449.82	1138.33	1458.04	841.434	917.346	1507.8	1257.12	984.257	895.897	1269.84	1532.66	1481.56	948.661	1195.53
ENSG00000013016	EHD3	-1.36378	0.0189468	0.118513	1996.03	1386.21	4778.32	441.267	994.601	2776.33	291.926	668.304	748.035	2776.83	2145.87	521.693	2546.19	2886.02	1430.45
ENSG00000013275	PSMC4	0.264872	0.443548	0.72916	2245.98	2250.39	2250.87	4941.66	2606.78	1822.55	4357.69	2062.81	1877.04	2028.6	1750.05	1460.74	1717.56	2082.7	1975.95
ENSG00000013288	MAN2B2	-0.119294	0.59907	0.829578	2258.95	2909.5	4031.29	2590.45	3479.63	2471.79	4096.6	2302.26	2597.28	2909.19	2655.22	2650	2123.14	3189.77	3807.57
ENSG00000013293	SLC7A14	-0.366145	0.476995	0.753012	2772.99	720.521	2419.84	688.482	1652.43	2470.86	1454.81	690.875	1504.18	2037.6	2460.32	758.734	3193.88	1558.76	4044.49
ENSG00000013297	CLDN11	-1.81377	NA	NA	37.7277	14.2569	48.0234	15.9494	11.782	63.523	29.867	2269.88	119.269	259.315	12.0555	20.2599	30.5927	22.6286	70.6765
ENSG00000013306	SLC25A39	-0.17391	0.551011	0.801482	2408.68	2142.92	3753.83	4332.92	3753.56	2964.09	4809.55	3428.86	2964.35	3144.19	2004.22	2294.44	1963.18	2168.87	2698.65
ENSG00000013364	MVP	-1.04451	0.013201	0.0935976	1030.44	934.374	3831.2	2489.44	1426.61	2215.83	429.699	1703.64	1371.01	3353.99	1777.18	1007.93	1326.85	1765.9	2968.41
ENSG00000013374	NUB1	0.241927	0.334568	0.643751	1601.07	2289.87	1612.34	3623.17	1946	1745.01	2794.01	1895.98	1625.76	1855.72	1809.33	1584.33	1581.21	2027	1884.37
ENSG00000013375	PGM3	0.0275047	0.954834	0.983025	606.001	2500.44	875.982	1396.9	594.011	809.918	432.59	547.597	702.875	724.821	696.203	567.278	338.268	666.674	781.423
ENSG00000013392	RWDD2A	0.125842	0.754132	0.90622	417.363	820.319	299.701	273.798	251.35	395.15	196.544	221.787	320.752	201.689	345.59	317.068	172.193	319.412	257.82
ENSG00000013441	CLK1	0.716159	0.0462299	0.212811	1681.24	1142.74	1300.19	2683.49	2384.88	1433	1123.38	2738.97	3574.59	1206.53	1222.63	3544.48	1670.36	1801.59	2321.37
ENSG00000013503	POLR3B	0.147314	0.528512	0.788465	284.137	420.03	302.369	442.596	416.299	407.294	505.812	278.705	250.117	306.136	391.803	497.381	320.787	332.467	359.355
ENSG00000013523	ANGEL1	0.724883	0.0510823	0.227147	542.336	2012.41	769.263	1711.9	1038.78	688.477	2108.03	1052.01	873.094	627.578	870.003	1038.32	766.567	1026.99	746.582
ENSG00000013561	RNF14	-0.0936153	0.780963	0.917198	1237.94	1953.19	1806.21	3577.98	1931.27	1760.89	1693.75	1174.68	846.461	1617.12	1479.81	1506.33	1172.14	1591.84	1271.18
ENSG00000013563	DNASE1L1	0.105663	0.763487	0.910744	582.421	629.496	593.177	1871.4	988.71	834.206	783.286	607.46	820.986	973.331	1313.04	572.343	720.241	747.615	697.806
ENSG00000013573	DDX11	0.148537	0.791151	0.921403	218.113	140.375	482.012	873.23	807.07	603.468	443.188	816.489	741.088	198.988	245.128	330.237	555.04	396.001	129.408
ENSG00000013583	HEBP1	0.413599	0.234043	0.537067	674.383	772.065	234.781	408.039	488.955	434.385	571.327	920.513	384.439	466.407	418.928	348.471	402.95	336.818	323.519
ENSG00000013588	GPRC5A	-1.76943	NA	NA	2.35798	8.77347	0.889322	2.65823	0.981837	0.934161	8.67106	374.878	8.10565	41.4183	3.01387	3.03899	3.49631	0.870332	4.97722
ENSG00000013619	MAMLD1	5.43133	4.44729e-15	2.00827e-12	4265.59	522.021	72.035	8813.37	4724.6	114.902	6643.96	2574.1	4070.19	113.45	5224.04	7365.5	2358.26	5075.77	209.043
ENSG00000013725	CD6	-0.0270655	0.967494	0.988232	48.3386	51.5441	64.9205	42.5317	34.3643	49.5105	33.7208	113.837	40.5282	64.8287	98.453	6.07798	176.564	25.2396	31.8542
ENSG00000013810	TACC3	0.387906	0.298402	0.608417	358.413	169.986	449.997	305.697	256.259	154.137	500.031	373.897	341.595	189.984	380.752	392.03	409.069	496.089	172.212
ENSG00000014123	UFL1	0.275929	0.51291	0.777807	870.095	2909.5	952.463	885.192	694.159	861.297	750.529	770.365	1086.16	902.2	1656.62	770.89	502.595	1082.69	1175.62
ENSG00000014138	POLA2	0.586732	0.143621	0.413341	232.261	173.276	212.548	477.153	654.885	171.886	224.484	223.749	180.64	164.773	268.234	181.326	283.201	230.638	170.221
ENSG00000014164	ZC3H3	0.418194	0.104193	0.345151	560.021	444.157	509.581	735.002	668.631	383.94	687.904	405.301	521.077	444.797	447.057	976.529	521.825	706.709	479.804
ENSG00000014216	CAPN1	-1.18718	0.0177043	0.113133	2238.9	423.32	6719.71	381.456	2653.91	2823.97	1769.86	2178.61	1904.83	3286.46	2129.8	1540.77	2492	1921.69	2901.72
ENSG00000014641	MDH1	0.0560039	0.87172	0.954968	4508.46	4521.62	2883.18	2773.87	4662.74	3732.91	2029.99	1446.52	3317.52	4073.4	6628.5	3329.72	4054.85	3821.63	3354.64
ENSG00000014824	SLC30A9	-0.348632	0.0876357	0.31266	2393.35	2698.94	3473.69	2523.99	3594.51	3192.03	3731.45	1835.14	1916.41	3616	2851.12	2920.47	2632.72	2589.24	2609.06
ENSG00000014914	MTMR11	-2.55139	0.000674607	0.0102933	9.43192	37.2872	392.191	41.2026	22.5823	262.499	45.2822	248.283	71.7929	547.442	34.1572	26.3379	38.4595	40.0352	205.061
ENSG00000014919	COX15	-0.151168	0.337094	0.646244	752.196	979.338	953.353	669.875	881.69	1010.76	976.94	666.342	715.613	855.379	1026.72	837.748	896.804	839	909.835
ENSG00000015133	CCDC88C	-0.236339	0.714954	0.886436	16.5059	18.6436	54.2486	15.9494	36.328	37.3664	177.275	452.406	53.2657	89.1395	34.1572	26.3379	60.3114	87.9035	38.8223
ENSG00000015153	YAF2	-0.286137	0.466839	0.745794	405.573	447.447	767.485	1120.45	548.847	606.271	253.388	314.034	386.755	391.673	507.334	665.539	317.29	520.458	306.597
ENSG00000015171	ZMYND11	-0.303576	0.146679	0.418646	2727.01	2564.05	3400.77	1435.45	2828.67	2982.78	1771.79	2462.23	2064.62	2555.33	2695.4	2343.06	2664.19	2337.71	3073.93
ENSG00000015285	WAS	-0.651154	0.171336	0.453533	35.3697	105.282	97.8254	136.899	36.328	100.889	42.3919	183.514	83.3724	180.98	47.2173	70.9098	63.8077	72.2375	90.5853
ENSG00000015413	DPEP1	2.45005	0.00466664	0.0450649	23.5798	32.9005	7.11457	135.57	57.9284	11.2099	63.5878	257.116	75.2667	34.2152	34.1572	289.717	18.3556	152.308	7.96355
ENSG00000015475	BID	1.14367	0.0105641	0.0797603	278.242	103.088	48.9127	102.342	250.368	37.3664	210.032	270.855	126.216	132.359	114.527	138.781	109.26	103.569	125.426
ENSG00000015479	MATR3	0.450993	0.111983	0.359979	180.386	217.143	175.196	356.203	167.894	170.951	270.73	160.943	150.533	156.669	261.202	361.64	219.394	190.603	214.02
ENSG00000015532	XYLT2	0.335643	0.339256	0.647643	848.873	423.32	680.331	328.292	900.345	626.822	1399.89	1036.31	720.244	590.662	637.935	580.447	1090.85	933.866	676.901
ENSG00000015592	STMN4	4.60466	0.000406882	0.00701538	1602.25	9.87015	12.4505	43.8608	48.11	21.4857	1437.47	541.709	75.2667	12.6056	13.0601	9.11697	16.6075	715.413	15.9271
ENSG00000015676	NUDCD3	0.183716	0.471261	0.749452	2481.78	2875.5	2487.43	4899.12	2667.65	2461.51	2639.86	2260.07	1792.51	1953.87	2249.35	2886.03	2162.47	2433.45	2016.77
ENSG00000016082	ISL1	-7.39298	1.18201e-40	7.47265e-37	2.35798	6.5801	747.919	17.2785	3.92735	1759.03	6.74416	10.7949	11.5795	1428.93	6.02774	15.1949	9.61486	4.35166	0
ENSG00000016391	CHDH	3.95667	1.37924e-06	7.52571e-05	257.02	98.7015	11.5612	14.6203	384.88	6.53913	52.9898	134.446	93.7939	13.506	79.3652	107.378	510.462	210.62	18.9134
ENSG00000016402	IL20RA	6.06228	2.20635e-09	3.14629e-07	1546.84	2512.5	16.0078	101.013	928.818	4.67081	166.677	527.97	35.8964	12.6056	1560.18	348.471	39.3335	1068.77	65.6993
ENSG00000016864	GLT8D1	0.197701	0.357219	0.661448	1919.4	3349.27	1688.82	2223.61	2301.43	1831.89	2241.95	1534.84	1486.81	1916.95	2046.42	2185.03	1883.64	1682.35	2091.43
ENSG00000017260	ATP2C1	-0.417199	0.0253008	0.143939	2988.74	3213.28	5044.23	3728.17	3523.81	4107.51	3347.03	2156.04	2959.72	3843.8	3469.97	2672.29	4435.07	3448.25	2985.33
ENSG00000017427	IGF1	0.260287	0.841846	0.943038	0	14.2569	3.55729	55.8229	16.6912	6.53913	0.963451	41.217	8.10565	26.1116	0	2.02599	0.874078	6.09232	27.8724
ENSG00000017483	SLC38A5	1.62798	0.0736261	0.281361	25.9378	15.3536	2.66796	13.2912	2.94551	0.934161	79.9665	45.1424	68.319	24.3108	20.0925	32.4159	8.74078	25.2396	7.96355
ENSG00000017797	RALBP1	0.155755	0.587042	0.823082	1642.33	2071.63	1439.81	855.951	1475.7	1374.15	2970.32	2109.92	1306.17	1629.72	1572.23	1252.06	1632.78	1485.66	1424.48
ENSG00000018189	RUFY3	0.813765	0.00848699	0.0684955	5029.57	5178.54	2738.22	2174.43	4558.67	2525.97	6472.47	2988.23	4167.46	2556.23	5815.76	7033.24	4734.01	4138.43	2694.66
ENSG00000018236	CNTN1	-0.410674	0.373582	0.674731	2602.03	4886.82	3735.15	4853.93	1311.73	3253.68	1872.95	1203.14	1271.43	3299.06	2131.81	3665.02	1549.74	1405.59	4204.75
ENSG00000018280	SLC11A1	1.30255	0.0407181	0.195608	34.1907	36.1905	9.78254	115.633	39.2735	19.6174	25.0497	170.756	42.8441	34.2152	29.1341	26.3379	48.0743	26.9803	33.8451
ENSG00000018408	WWTR1	-0.839689	NA	NA	30.6538	57.0275	82.7069	158.165	76.5833	75.6671	101.162	2062.81	411.072	560.948	120.555	52.6758	163.453	120.976	195.107
ENSG00000018510	AGPS	-0.11624	0.570504	0.813548	451.553	448.543	565.609	377.469	517.428	480.159	596.376	638.864	386.755	506.925	529.436	318.081	424.802	469.109	569.394
ENSG00000018610	CXorf56	0.254219	0.316379	0.626786	736.869	900.377	567.387	1404.88	785.47	837.008	1062.69	730.13	688.98	688.805	812.74	528.784	930.894	659.711	746.582
ENSG00000018625	ATP1A2	1.46889	0.055108	0.237594	168.596	131.602	176.975	93.0382	494.846	339.101	683.087	1115.8	1867.77	487.116	402.854	551.07	1988.53	1800.72	1808.72
ENSG00000018699	TTC27	0.0403842	0.881486	0.958122	275.884	247.85	233.892	243.228	470.3	241.948	193.654	269.873	206.115	255.713	295.359	177.274	193.171	245.433	191.125
ENSG00000018869	ZNF582	-0.130281	0.567869	0.812143	109.646	154.632	138.734	211.33	116.839	184.964	197.508	111.875	144.744	146.765	142.656	143.846	117.127	128.809	142.348
ENSG00000019102	VSIG2	0.69324	0.470253	0.748694	2.35798	9.87015	2.66796	17.2785	7.8547	1.86832	3.85381	67.7136	13.8954	21.6096	3.01387	7.09098	6.99263	11.3143	17.918
ENSG00000019144	PHLDB1	0.295388	0.575224	0.816251	953.803	444.157	1287.74	882.533	607.757	796.839	3034.87	3762.52	1431.23	1320.89	927.267	1536.72	949.249	1092.27	1093.99
ENSG00000019169	MARCO	-1.23098	0.358616	0.66239	2.35798	1.09668	2.66796	21.2659	4.90919	0.934161	1.9269	7.85086	5.78975	66.6295	0	41.5329	0	12.1846	20.9043
ENSG00000019485	PRDM11	1.04354	0.00766752	0.0633924	601.285	355.325	437.546	228.608	732.45	330.693	1035.71	659.472	606.765	222.398	853.929	489.277	572.521	1025.25	1005.4
ENSG00000019505	SYT13	1.86226	0.0673446	0.267043	2401.6	31.8038	773.71	31.8988	1687.78	203.647	2207.27	1070.66	562.763	29.7132	1903.76	46.5978	1627.53	2242.84	831.195
ENSG00000019549	SNAI2	-0.215962	NA	NA	1.17899	7.67678	5.33593	229.937	0.981837	1.86832	5.78071	887.147	62.5293	108.948	11.0508	38.4939	14.8593	6.96265	4.97722
ENSG00000019582	CD74	-0.293982	0.655489	0.859267	2930.97	18917.8	7759.33	5644.76	2392.74	5216.36	1194.68	15028.5	5142.45	9630.67	1745.03	3728.84	4886.1	3489.16	8654.38
ENSG00000019991	HGF	-1.90939	NA	NA	1.17899	0	4.44661	1.32912	12.7639	6.53913	1.9269	288.519	26.6328	140.462	6.02774	3.03899	12.2371	17.4066	68.6856
ENSG00000019995	ZRANB1	-0.246599	0.202455	0.496442	389.067	517.634	668.77	357.532	452.627	478.291	344.916	381.748	380.965	418.685	454.089	421.407	536.684	536.995	502.699
ENSG00000020129	NCDN	-0.231862	0.432445	0.721604	4760.76	6708.41	4873.48	4049.82	4441.83	5067.82	4725.73	2129.55	2161.89	3981.56	3388.59	3246.65	3452.61	3870.36	4487.46
ENSG00000020181	ADGRA2	0.0512765	0.956799	0.983812	209.86	141.472	827.069	75.7596	221.895	154.137	203.288	4719.35	1538.91	1600.91	394.817	453.822	851.352	526.551	1364.75
ENSG00000020256	ZFP64	-0.127652	0.632056	0.847987	310.075	323.522	312.152	107.658	268.042	267.17	290.962	326.792	220.01	284.526	224.031	220.833	325.157	249.785	293.656
ENSG00000020426	MNAT1	-0.0197797	0.955127	0.983065	379.635	625.109	542.486	1034.05	557.683	610.941	798.701	432.779	266.328	470.909	430.983	667.565	318.165	431.684	467.858
ENSG00000020577	SAMD4A	0.826091	0.322399	0.63318	306.538	53.7375	48.9127	66.4558	54.001	69.1279	27.9401	726.204	81.0565	159.371	202.934	51.6628	187.927	183.64	24.8861
ENSG00000020633	RUNX3	-1.07137	0.109317	0.355607	9.43192	108.572	61.3632	35.8861	20.6186	61.6546	16.3787	428.853	111.163	153.968	17.0786	33.4289	56.8151	16.5363	52.7585
ENSG00000020922	MRE11	-0.030804	0.877501	0.957026	361.95	239.077	310.373	248.545	294.551	335.364	402.723	445.536	279.066	325.044	271.248	281.613	367.987	298.524	307.592
ENSG00000021300	PLEKHB1	0.758013	0.132784	0.39672	2043.19	985.918	1989.41	1830.19	6419.25	2258.8	2793.05	1289.5	4494	1881.83	7503.53	2527.43	3752.42	2700.64	5127.53
ENSG00000021355	SERPINB1	-0.00968932	0.983858	0.993802	760.449	1620.9	1189.02	930.382	1135	1088.3	395.015	947.991	588.238	1211.04	533.455	1185.21	1192.24	1347.27	3223.25
ENSG00000021488	SLC7A9	0.0688545	0.932876	0.976	2.35798	5.48342	10.6719	55.8229	4.90919	12.1441	13.4883	18.6458	12.7374	11.7052	5.02311	3.03899	8.74078	6.96265	8.95899
ENSG00000021574	SPAST	-0.405575	0.0531748	0.232667	418.542	378.356	608.296	217.975	362.298	500.71	474.982	362.121	406.44	470.909	386.78	384.939	433.543	398.612	543.512
ENSG00000021645	NRXN3	-1.14031	0.037262	0.184424	1195.5	377.259	1507.4	265.823	991.656	1561.92	142.591	409.226	355.49	765.339	355.636	484.212	1158.15	901.663	320.533
ENSG00000021762	OSBPL5	0.816168	0.217607	0.516086	759.27	83.3479	313.041	220.633	785.47	170.951	137.774	1341.52	844.145	528.534	546.515	354.549	776.182	1079.21	202.075
ENSG00000021776	AQR	-0.119714	0.39372	0.689591	598.927	610.853	746.141	782.85	587.139	712.765	561.692	620.218	568.553	615.873	624.875	562.213	652.063	663.193	807.304
ENSG00000021826	CPS1	-1.80961	0.0487162	0.220198	8.25293	49.3507	107.608	31.8988	4.90919	78.4695	26.9766	75.5645	16.2113	169.275	10.0462	3.03899	7.86671	13.055	158.275
ENSG00000022267	FHL1	0.417107	0.286394	0.595652	3788.1	2954.46	1698.6	2882.85	1165.44	1629.18	1580.06	4981.37	1997.46	2424.77	1875.63	2435.24	3808.36	1510.03	1746.01
ENSG00000022277	RTF2	-0.103478	0.611992	0.837086	2627.97	3701.31	2270.44	2656.9	2529.21	2816.5	3070.52	2363.11	1910.62	2776.83	2092.63	2065.5	2049.71	1992.19	2219.84
ENSG00000022355	GABRA1	4.21591	0.0482884	0.218923	5.89495	35.0939	0	47.8482	0	2.80248	0	20.6085	0	0.900399	0	1.013	0	0.870332	163.253
ENSG00000022556	NLRP2	-5.91465	1.48297e-11	3.23286e-09	5.89495	65.801	505.135	10.6329	3.92735	808.984	12.5249	6.8695	6.9477	607.769	1.00462	7.09098	1.74816	2.61099	2.98633
ENSG00000022567	SLC45A4	1.18181	0.0209197	0.126559	3386.06	1432.27	832.405	627.343	2998.53	1032.25	2575.31	1262.03	2839.29	1419.03	3180.63	4938.36	3328.49	2608.38	620.161
ENSG00000022840	RNF10	0.479239	0.10573	0.348078	4331.61	5836.55	3281.6	8362.8	5743.75	3064.98	5813.47	3800.8	2868.24	3636.71	4213.39	4805.66	3299.65	3460.44	3133.66
ENSG00000022976	ZNF839	0.414566	0.264912	0.572507	258.199	406.869	275.69	626.014	250.368	297.997	834.349	421.984	228.116	286.327	270.243	393.043	301.557	270.673	324.514
ENSG00000023041	ZDHHC6	-0.053596	0.747664	0.90331	411.468	409.063	425.096	582.153	488.955	552.089	333.354	483.809	556.974	492.518	492.265	490.29	478.121	515.236	424.059
ENSG00000023171	GRAMD1B	-1.51575	0.00329525	0.0347017	519.935	149.149	2792.47	305.697	735.396	1078.02	655.147	399.412	437.705	1500.06	664.055	585.512	388.965	1262.85	1407.56
ENSG00000023191	RNH1	-0.103205	0.52987	0.789249	3018.22	2727.45	2856.5	3180.58	3136.97	3086.47	3489.62	3999.03	3341.84	4072.5	3564.4	2600.36	2668.56	3011.35	2558.29
ENSG00000023228	NDUFS1	-0.23502	0.310951	0.621444	1779.1	1683.41	2603.04	1383.61	2207.17	1933.71	1546.34	1231.6	1665.13	2049.31	2780.8	1587.37	2117.02	2163.64	2236.76
ENSG00000023287	RB1CC1	0.981702	0.00103342	0.0141312	977.383	1025.4	695.449	566.204	1232.21	549.287	1960.62	1300.3	933.307	528.534	1220.62	1627.89	1103.09	1284.61	773.459
ENSG00000023318	ERP44	0.945056	0.0287512	0.15701	1254.45	3556.54	777.267	3627.16	970.055	743.592	1279.46	1021.59	1146.37	994.04	1292.95	1890.25	1041.9	1067.9	1221.41
ENSG00000023330	ALAS1	-0.184441	0.6174	0.839776	679.099	565.888	891.99	364.178	613.648	777.222	1472.15	814.526	661.189	868.885	537.473	463.952	660.803	704.969	1394.62
ENSG00000023445	BIRC3	1.09213	0.0639225	0.259438	828.83	75.6711	209.88	902.47	846.344	212.055	335.281	469.089	147.06	231.402	439.02	446.732	154.712	684.951	241.893
ENSG00000023516	AKAP11	0.0572989	0.777063	0.915162	1326.36	2517.98	1684.38	2363.17	1619.05	1897.28	1980.86	1490.68	1556.28	1797.2	2004.22	2219.48	1669.49	1538.75	2102.38
ENSG00000023572	GLRX2	0.371286	0.343003	0.651126	199.249	264.301	85.3749	77.0888	174.767	91.5478	192.69	125.614	77.5826	163.873	158.73	78.0007	117.127	180.159	117.462
ENSG00000023608	SNAPC1	0.260952	0.504771	0.773302	185.102	370.679	159.189	518.355	227.786	334.43	436.443	262.022	203.799	251.211	223.026	531.823	220.268	212.361	179.18
ENSG00000023697	DERA	0.0191498	0.959486	0.985519	433.869	440.867	345.946	1277.28	786.452	568.904	611.792	421.002	306.857	723.02	515.371	566.265	393.335	456.924	431.027
ENSG00000023734	STRAP	0.328887	0.398969	0.694665	3710.28	6855.37	2408.28	9212.11	4465.4	3280.77	2950.09	2215.9	2187.37	4382.24	4228.46	4446.04	3886.15	3451.73	2993.3
ENSG00000023892	DEF6	-0.73624	0.17473	0.458422	173.312	122.829	821.733	369.494	404.517	307.339	83.8203	198.234	250.117	303.434	242.114	186.391	826.004	333.337	248.861
ENSG00000023902	PLEKHO1	0.819297	0.0360475	0.180915	1201.39	829.092	272.132	344.241	766.815	299.866	356.477	1020.61	774.668	523.132	387.784	568.291	550.669	445.61	484.781
ENSG00000023909	GCLM	0.0562253	0.871203	0.954935	344.265	319.135	352.171	183.418	592.048	386.743	632.024	349.363	230.432	271.02	364.678	220.833	312.92	253.266	396.186
ENSG00000024048	UBR2	0.38724	0.18652	0.475351	883.064	1979.51	1074.3	974.243	1020.13	861.297	628.17	941.122	1023.63	792.351	1013.66	1612.69	1524.39	1341.18	1328.92
ENSG00000024422	EHD2	-0.173164	0.849519	0.945649	70.7394	107.475	170.75	69.1141	201.277	160.676	117.541	2276.75	781.616	1297.47	202.934	198.547	652.937	420.37	678.892
ENSG00000024526	DEPDC1	1.20074	0.200477	0.494031	36.5487	8.77347	18.6758	2.65823	19.6367	18.6832	191.727	52.0119	12.7374	10.8048	47.2173	6.07798	39.3335	16.5363	8.95899
ENSG00000024862	CCDC28A	-0.238825	0.626053	0.844323	1281.56	2636.43	525.589	894.496	507.61	1542.3	505.812	469.089	794.353	1436.14	1521	898.528	562.032	873.813	933.726
ENSG00000025039	RRAGD	0.0525603	0.904059	0.965527	854.768	1290.8	1902.26	980.888	1071.18	716.502	870.96	502.455	1366.38	588.861	1959.01	449.771	843.486	1437.79	1679.31
ENSG00000025156	HSF2	0.962083	0.00692419	0.0592886	1180.17	1035.27	445.55	498.419	762.887	389.545	486.543	417.077	741.088	395.275	1585.29	767.851	542.803	866.85	703.778
ENSG00000025293	PHF20	-0.121388	0.529165	0.788949	910.181	984.821	1105.43	560.887	1034.86	1067.75	1250.56	1038.28	971.519	1102.99	1223.63	869.151	1083.86	1083.56	1031.28
ENSG00000025423	HSD17B6	0.250994	0.756572	0.907255	16.5059	39.4806	11.5612	3.98735	8.83653	13.0783	10.598	47.1051	9.26359	13.506	21.0971	5.06498	13.9853	2.61099	2.98633
ENSG00000025434	NR1H3	-1.50701	0.000818116	0.0118718	47.1596	118.442	176.975	46.5191	64.8013	172.82	49.136	512.268	200.325	370.964	62.2866	73.9488	67.304	57.4419	125.426
ENSG00000025708	TYMP	-1.55889	0.00755958	0.0628432	49.5176	126.119	353.061	91.709	152.185	255.026	87.6741	1765.46	193.378	741.028	36.1664	334.289	76.9189	143.605	347.41
ENSG00000025770	NCAPH2	-0.029438	0.925797	0.973314	1730.76	2013.51	1683.49	2161.14	1382.43	1604.89	713.917	964.674	1602.6	1515.37	1487.85	2668.23	1377.55	1128.82	1597.69
ENSG00000025772	TOMM34	0.0861577	0.755271	0.906612	868.916	1249.12	885.764	1217.47	886.599	717.436	731.26	478.902	507.182	701.411	605.787	844.839	729.856	832.907	835.177
ENSG00000025796	SEC63	0.245433	0.502997	0.772298	2340.3	6663.45	2635.06	3849.12	2382.92	2334.47	1560.79	2262.03	3085.93	2417.57	3193.69	2456.52	1423.87	3053.99	2757.38
ENSG00000025800	KPNA6	-0.400316	0.0311951	0.165452	1796.78	1941.13	2742.67	2869.56	2694.16	2994.92	2947.2	1995.1	1989.36	2948.81	1878.64	1885.19	1811.96	2103.59	2414.95
ENSG00000026025	VIM	-0.702162	NA	NA	525.83	671.17	809.283	576.837	951.4	606.271	11647.2	37123.8	5306.88	11342.3	1881.66	1314.87	3213.11	1993.06	1341.86
ENSG00000026036	RTEL1-TNFRSF6B	-0.821053	0.105093	0.346769	485.744	354.229	1707.5	400.064	322.043	541.813	158.969	279.687	915.938	471.809	445.048	1087.96	441.41	504.792	765.496
ENSG00000026103	FAS	0.424719	0.62126	0.841689	9.43192	85.5413	14.2291	26.5823	10.8002	16.8149	52.9898	281.65	40.5282	106.247	32.1479	16.2079	69.0522	53.0902	58.7312
ENSG00000026297	RNASET2	0.207734	0.629748	0.847035	953.803	1695.47	574.502	602.09	386.844	564.233	347.806	853.781	545.394	612.271	394.817	481.173	370.609	590.085	868.026
ENSG00000026508	CD44	1.0127	0.36154	0.664113	275.884	42.7706	39.1301	13.2912	46.1463	28.959	24.0863	1587.84	238.538	302.534	227.045	21.2729	367.987	91.3848	54.7494
ENSG00000026559	KCNG1	0.393308	0.815845	0.932041	0	4.38673	0.889322	220.633	0	1.86832	1.9269	45.1424	9.26359	19.8088	0	1.013	0	49.6089	2.98633
ENSG00000026652	AGPAT4	-0.0304698	0.952372	0.982307	1213.18	688.717	989.815	528.988	188.513	425.978	310.231	455.35	1285.32	572.654	553.547	985.646	229.009	771.114	579.348
ENSG00000026751	SLAMF7	-1.0053	0.37041	0.672525	1.17899	52.6408	20.4544	2.65823	4.90919	12.1441	3.85381	77.5272	4.6318	61.2271	4.01849	4.05199	0.874078	16.5363	13.9362
ENSG00000026950	BTN3A1	0.286407	0.486261	0.759387	261.736	284.041	320.156	248.545	623.467	353.113	302.524	885.184	640.346	560.948	495.279	309.977	624.092	830.296	513.649
ENSG00000027001	MIPEP	-0.139174	0.589326	0.82411	201.607	165.599	279.247	454.558	243.496	308.273	276.511	230.619	220.01	297.132	289.331	355.562	243.868	240.211	293.656
ENSG00000027075	PRKCH	1.01725	0.0657552	0.263757	147.374	200.693	235.67	781.521	621.503	245.684	689.831	1008.84	414.546	230.502	284.308	254.262	152.964	901.663	305.601
ENSG00000027644	INSRR	0.346781	0.785314	0.919229	42.4437	1.09668	27.569	9.30382	0.981837	51.3789	500.995	231.6	40.5282	178.279	19.0878	8.10397	10.4889	86.1628	357.364
ENSG00000027697	IFNGR1	0.215414	0.646838	0.855385	637.834	2009.12	619.857	946.331	354.443	621.217	428.736	1253.19	677.4	730.223	584.69	544.992	274.461	785.909	658.983
ENSG00000027847	B4GALT7	0.271066	0.287847	0.597169	798.177	1155.9	853.749	1847.47	1110.46	1035.05	1231.29	794.899	1031.73	795.052	781.596	1341.21	802.404	1064.42	997.434
ENSG00000027869	SH2D2A	-0.970949	0.226461	0.52726	70.7394	5.48342	8.00389	2.65823	21.6004	32.6956	6.74416	29.4407	12.7374	78.3347	16.074	6.07798	22.726	21.7583	26.877
ENSG00000028116	VRK2	-1.38627	0.000602073	0.00946749	117.899	92.1214	560.273	62.4685	260.187	351.245	138.737	214.917	135.48	356.558	220.012	101.3	125.867	180.159	289.674
ENSG00000028137	TNFRSF1B	-0.145227	0.841594	0.942971	73.0974	234.69	165.414	146.203	102.111	165.347	83.8203	1198.24	258.223	480.813	97.4484	124.599	147.719	179.288	289.674
ENSG00000028203	VEZT	0.373639	0.318744	0.629194	1085.85	1098.88	1522.52	4302.35	1459.01	1465.7	2653.34	1646.72	1584.07	1214.64	1622.47	2213.4	1220.21	1597.06	1300.05
ENSG00000028277	POU2F2	-1.41418	0.00227057	0.0260833	301.822	69.091	466.005	364.178	99.1656	695.016	89.601	219.824	214.221	449.299	128.592	185.378	127.615	308.968	309.583
ENSG00000028310	BRD9	-0.626226	0.0615738	0.253761	972.667	1104.36	2714.21	1794.31	1497.3	1390.97	770.761	949.954	1357.12	1567.59	776.573	2275.19	1012.18	1267.2	924.767
ENSG00000028528	SNX1	0.22833	0.160102	0.437914	2956.91	2363.35	2387.83	2205	3119.3	2178.46	1837.3	2761.54	2384.22	2164.56	3255.98	2642.91	2889.7	2521.35	2601.09
ENSG00000028839	TBPL1	-0.36609	0.364043	0.666774	279.421	641.56	260.571	418.672	135.494	483.895	227.375	260.06	264.012	379.068	248.142	333.276	121.497	294.172	264.788
ENSG00000029153	ARNTL2	0.230835	0.579731	0.819032	384.351	772.065	427.764	478.482	335.788	223.265	279.401	156.036	181.798	258.414	320.475	190.443	475.499	312.449	383.246
ENSG00000029363	BCLAF1	-0.358253	0.0915736	0.319538	2836.65	3603.7	3756.49	2781.84	2239.57	3908.53	2192.82	2373.9	2572.96	3403.51	3584.49	3171.69	2097.79	2996.55	4087.29
ENSG00000029364	SLC39A9	0.346077	0.301383	0.611589	1174.27	2764.74	1485.17	1859.43	1921.46	1529.22	4012.77	1896.96	1306.17	1355.1	1412.5	1608.64	1461.46	1369.9	1427.47
ENSG00000029534	ANK1	-0.192707	0.799561	0.924713	1498.5	214.95	1503.84	75.7596	632.303	283.051	311.195	319.922	618.345	169.275	635.926	101.3	1035.78	1090.53	311.574
ENSG00000029559	IBSP	-6.39801	NA	NA	0	25.2237	0.889322	26.5823	0	13.0783	11.5614	3118.75	28.9487	3607	40.1849	0	0.874078	21.7583	2.98633
ENSG00000029639	TFB1M	-0.235636	0.581288	0.819986	181.565	336.682	257.903	118.291	69.7104	181.227	89.601	128.558	191.062	162.972	302.391	190.443	102.267	208.009	127.417
ENSG00000029725	RABEP1	0.197586	0.456796	0.739522	1573.95	1198.67	1563.43	1116.46	1894.95	1557.25	3256.47	1664.38	1469.44	1414.53	1831.43	1491.13	1983.28	1797.23	1523.03
ENSG00000029993	HMGB3	2.23078	2.93335e-05	0.000895877	571.81	111.862	51.5807	236.583	296.515	79.4037	669.599	321.885	229.274	75.6335	341.572	178.287	311.172	543.087	66.6947
ENSG00000030066	NUP160	0.0950746	0.685139	0.873687	538.799	491.314	505.135	471.836	570.447	729.58	922.023	923.457	692.454	587.06	509.344	722.267	585.633	627.509	725.678
ENSG00000030110	BAK1	-0.0492961	0.902938	0.965496	169.775	460.607	186.758	134.241	198.331	201.779	96.3451	168.793	180.64	235.004	94.4345	187.404	302.431	173.196	243.884
ENSG00000030304	MUSK	-3.31619	0.000399686	0.00692278	2.35798	5.48342	4.44661	2.65823	0.981837	62.5888	3.85381	0.981357	2.3159	66.6295	1.00462	8.10397	0.874078	6.96265	17.918
ENSG00000030419	IKZF2	-0.277082	0.362155	0.664664	88.4243	74.5745	154.742	115.633	138.439	141.058	92.4913	98.1357	119.269	116.151	181.837	58.7538	116.252	112.273	163.253
ENSG00000030582	GRN	-0.306579	0.498804	0.768756	3407.28	7749.16	3445.23	5029.38	4738.35	9180	15235.1	6829.26	4374.73	11952.8	5517.39	4209	6172.74	4295.09	11932.4
ENSG00000031003	FAM13B	-0.514714	0.0679183	0.26825	601.285	776.452	1541.19	1516.52	688.268	1159.29	934.548	837.098	570.869	1026.45	676.111	947.152	790.167	850.314	1247.29
ENSG00000031081	ARHGAP31	0.798546	0.43117	0.720676	33.0117	69.091	65.8098	103.671	662.74	40.1689	43.3553	1522.09	239.696	358.359	58.2681	36.4679	97.8968	258.488	105.517
ENSG00000031691	CENPQ	0.00589235	0.989119	0.994942	68.3815	237.98	126.284	63.7976	120.766	107.429	65.5147	87.3408	63.6872	77.4343	95.4391	121.56	178.312	55.7012	90.5853
ENSG00000031698	SARS	-0.112586	0.473814	0.75074	4612.21	4745.35	4411.04	3964.76	4635.25	4837.09	4115.86	2979.4	3990.29	4685.68	5486.24	3657.93	4635.24	4163.67	4564.11
ENSG00000031823	RANBP3	0.00568574	0.979335	0.991986	2627.97	2839.31	2367.37	3457.03	2246.44	2440.03	1969.29	1490.68	1800.61	2067.32	2588.91	2409.92	2177.33	1938.23	2065.54
ENSG00000032219	ARID4A	-0.0290865	0.912159	0.968186	701.499	1060.49	776.378	357.532	756.015	1000.49	1020.29	942.103	927.517	840.972	727.347	1136.58	882.819	827.685	919.79
ENSG00000032389	EIPR1	-0.473455	0.225386	0.52613	1399.46	1577.03	1444.26	527.659	958.273	1198.53	511.593	419.04	567.395	1126.4	944.345	1362.48	1202.73	746.744	642.061
ENSG00000032444	PNPLA6	-0.476342	0.107307	0.3515	2095.07	2684.68	5213.2	4072.41	2320.08	3311.6	2975.14	2185.48	3472.69	2827.25	2401.05	1809.21	1961.43	2257.64	4406.83
ENSG00000032742	IFT88	-0.198173	0.517751	0.78064	445.658	693.104	668.77	1313.17	845.362	1032.25	606.011	520.119	707.507	928.311	919.23	1083.91	549.795	601.399	883.954
ENSG00000033011	ALG1	0.592102	0.0429697	0.203537	438.584	916.827	276.579	630.001	507.61	374.599	397.905	286.556	500.234	313.339	359.655	405.199	501.721	499.57	373.291
ENSG00000033030	ZCCHC8	0.0237613	0.936729	0.977227	768.702	389.323	505.135	809.432	326.952	540.879	437.407	612.367	550.026	500.622	358.65	764.812	370.609	421.24	482.79
ENSG00000033050	ABCF2	0.0926353	0.791871	0.921617	643.729	865.283	1050.29	1742.47	922.927	976.198	2262.18	1064.77	875.41	957.124	809.726	769.877	644.196	1026.12	1099.96
ENSG00000033100	CHPF2	0.243889	0.542389	0.796664	1913.5	4152.04	2804.92	7930.84	2771.73	2032.73	3134.11	1828.27	2143.36	2704.8	2214.19	2131.34	2052.34	2403.86	3054.02
ENSG00000033122	LRRC7	-0.892037	0.187188	0.476027	220.471	100.895	26.6796	30.5697	23.5641	341.903	41.4284	51.0306	162.113	179.179	86.3975	76.9877	177.438	71.3672	138.367
ENSG00000033170	FUT8	0.122669	0.780972	0.917198	346.623	224.82	294.365	431.963	618.557	388.611	773.651	537.784	200.325	325.044	306.41	203.612	194.919	378.594	172.212
ENSG00000033178	UBA6	-0.405311	0.123189	0.381178	552.947	838.963	1205.92	731.014	764.851	1220.95	1024.15	695.782	815.196	1093.08	1147.28	1447.57	636.329	830.296	1145.76
ENSG00000033327	GAB2	0.242262	0.424786	0.716046	1032.8	481.444	603.849	523.672	560.629	533.406	755.346	736.999	819.828	614.072	817.763	494.342	994.701	746.744	321.528
ENSG00000033627	ATP6V0A1	0.250933	0.275171	0.58462	5788.84	5652.3	5062.02	4586.78	4725.58	5008.04	10166.3	4842.02	6465.99	4490.29	6787.23	4807.68	4990.11	4761.58	5730.77
ENSG00000033800	PIAS1	-0.520352	0.0130884	0.0930414	597.748	477.057	1038.73	653.925	667.649	992.079	589.632	650.64	545.394	824.765	799.68	511.563	671.292	823.334	973.543
ENSG00000033867	SLC4A7	1.24062	0.0072157	0.0609318	114.362	198.5	41.7981	390.76	241.532	105.56	106.943	204.122	143.586	70.2311	148.684	48.6238	133.734	151.438	175.198
ENSG00000034053	APBA2	3.25162	0.000634762	0.00979568	796.998	494.604	35.5729	30.5697	667.649	31.7615	221.594	367.028	1142.9	116.151	14.0647	1068.71	412.565	1738.92	34.8405
ENSG00000034152	MAP2K3	-0.585373	0.218417	0.517295	760.449	829.092	1093.87	198.038	347.57	875.309	526.044	682.043	794.353	1206.53	445.048	1788.95	566.403	436.906	1091.01
ENSG00000034239	EFCAB1	4.23358	0.00424183	0.0418007	5.89495	8.77347	0	3.98735	13.7457	0.934161	0.963451	70.6577	4.6318	1.8008	5.02311	81.0397	0.874078	8.70332	0.995443
ENSG00000034510	TMSB10	0.0932057	0.8506	0.946242	7059.8	4019.34	2157.49	3938.17	5576.83	2652.08	2456.8	9449.49	3419.42	6399.13	2549.73	1874.04	2720.13	3194.99	1568.82
ENSG00000034533	ASTE1	-0.199511	0.45367	0.73731	74.2764	140.375	128.952	150.19	139.421	192.437	206.179	166.831	138.954	169.275	92.4253	126.625	143.349	156.66	172.212
ENSG00000034677	RNF19A	0.687527	0.0667724	0.266133	1344.05	592.209	790.607	873.23	1961.71	851.955	1014.51	1406.28	849.935	802.255	2159.94	2294.44	1012.18	1445.62	794.364
ENSG00000034693	PEX3	-0.527768	0.221994	0.521501	200.428	596.596	352.171	369.494	160.039	439.99	136.81	235.526	250.117	428.59	411.895	157.014	132.86	322.023	415.1
ENSG00000034713	GABARAPL2	-0.283559	0.408894	0.702835	5087.34	6496.75	4177.14	6935.33	4554.74	5435.88	1854.64	2314.04	2906.45	5326.76	3819.57	3792.66	3424.64	3266.35	4645.73
ENSG00000035115	SH3YL1	0.689646	0.262756	0.570447	881.885	787.418	961.357	1552.41	3366.72	1125.66	421.992	680.081	1218.16	1105.69	1892.71	1217.62	870.582	1604.89	6103.06
ENSG00000035141	FAM136A	-0.412246	0.111722	0.359502	718.005	611.949	512.249	248.545	434.954	709.028	369.965	414.133	431.915	571.753	340.567	447.745	499.099	435.166	437
ENSG00000035403	VCL	-0.266533	0.718638	0.887812	412.647	99.7982	1038.73	1836.84	698.086	985.54	781.359	3846.92	788.563	1482.06	535.464	175.248	590.003	475.201	1419.5
ENSG00000035499	DEPDC1B	1.38084	0.147407	0.419768	23.5798	18.6436	15.1185	6.64558	8.83653	0.934161	66.4781	20.6085	5.78975	2.7012	15.0693	6.07798	18.3556	3.48133	1.99089
ENSG00000035664	DAPK2	-1.85111	NA	NA	7.07394	10.9668	9.78254	1.32912	16.6912	9.34161	3.85381	1660.46	42.8441	120.653	8.03698	9.11697	18.3556	13.9253	10.9499
ENSG00000035681	NSMAF	0.0775158	0.787131	0.919653	595.39	593.306	616.3	685.824	476.191	505.381	602.157	704.614	399.493	520.43	381.757	1020.09	366.239	448.221	658.983
ENSG00000035687	ADSS	-0.21667	0.251237	0.557779	528.188	651.43	739.916	671.204	804.125	750.131	707.173	758.589	546.552	888.694	986.539	688.838	527.069	663.193	654.006
ENSG00000035862	TIMP2	-1.53015	0.013386	0.0944491	3446.19	5585.41	12240.6	3972.73	1591.56	8292.55	3175.54	16525.1	3641.75	16221.6	1945.95	4764.12	3090.74	2268.08	896.894
ENSG00000035928	RFC1	0.111082	0.544033	0.797219	944.371	1287.51	1187.24	994.179	1312.72	1120.06	1366.17	1115.8	866.146	1039.06	1519.99	1207.49	1556.73	1150.58	1130.82
ENSG00000036054	TBC1D23	0.159069	0.323578	0.634245	543.515	702.974	616.3	724.369	698.086	603.468	861.326	631.994	609.081	538.438	615.834	541.953	575.144	567.456	781.423
ENSG00000036257	CUL3	-0.196868	0.209063	0.505814	1473.74	1483.81	1543.86	1614.88	1721.16	1667.48	1151.32	1030.43	1183.42	1556.79	1479.81	1262.19	1333.84	1348.14	1558.86
ENSG00000036448	MYOM2	2.79353	3.63936e-06	0.000160149	145.016	115.152	6.22525	17.2785	140.403	23.354	29.867	98.1357	90.32	15.3068	124.573	183.352	53.3188	170.585	74.6582
ENSG00000036530	CYP46A1	0.270279	0.465823	0.745561	798.177	717.231	765.706	1240.07	316.152	546.484	854.581	404.319	665.821	359.259	638.94	961.334	440.536	501.311	527.585
ENSG00000036549	AC118549.1	0.181827	0.411594	0.705557	618.97	900.377	768.374	481.14	868.926	723.975	1179.26	781.16	697.085	612.271	878.04	825.592	769.189	660.582	885.944
ENSG00000036672	USP2	-0.955572	0.208044	0.504356	937.297	468.284	3530.61	6577.8	499.755	2518.5	402.723	355.251	391.387	1188.53	1047.82	695.929	758.7	1740.66	1054.17
ENSG00000037042	TUBG2	-0.128729	0.680705	0.871853	921.971	787.418	1288.63	785.508	1248.9	1264.85	2583.98	1427.87	1211.21	1398.32	1175.41	1357.42	930.019	991.308	1035.26
ENSG00000037241	RPL26L1	0.200199	0.428672	0.719168	377.277	523.118	307.705	692.47	361.316	408.228	371.892	289.5	331.174	307.936	361.664	379.874	305.927	397.742	316.551
ENSG00000037280	FLT4	0.580628	0.496796	0.767358	74.2764	58.1242	144.07	86.3926	92.2927	66.3254	174.385	1652.61	225.8	360.16	204.943	85.0917	389.839	183.64	185.152
ENSG00000037474	NSUN2	0.109402	0.772555	0.914852	1015.11	1541.94	1891.59	3512.86	1662.25	1424.6	2972.25	1813.55	1157.95	1347.9	968.456	1779.84	1157.28	1120.99	1425.47
ENSG00000037637	FBXO42	-0.108137	0.623949	0.843289	947.908	562.598	1168.57	950.318	737.36	888.387	1083.88	789.011	787.406	801.355	1278.88	1030.22	866.212	786.78	787.396
ENSG00000037749	MFAP3	0.855729	0.0466264	0.213913	63.6655	142.569	87.1535	178.102	77.5651	65.3913	323.72	229.638	100.742	80.1355	106.49	87.1177	129.364	122.717	122.44
ENSG00000037757	MRI1	0.378078	0.155458	0.43005	601.285	514.344	291.697	293.735	637.212	521.262	646.476	727.186	748.035	534.837	544.505	671.617	669.544	515.236	435.009
ENSG00000037897	METTL1	0.813974	0.149109	0.421536	175.67	325.715	114.722	673.862	174.767	88.7453	350.696	236.507	123.901	169.275	87.4022	164.105	81.2893	120.976	108.503
ENSG00000038002	AGA	-0.4369	0.201289	0.495092	155.627	151.342	157.41	107.658	141.385	212.055	298.67	210.01	112.321	267.418	178.823	78.0007	130.238	123.587	193.116
ENSG00000038210	PI4K2B	0.857233	0.0376401	0.185376	193.354	255.527	101.383	81.0761	161.021	58.8522	226.411	223.749	177.166	112.55	141.652	189.43	111.882	168.844	46.7858
ENSG00000038219	BOD1L1	0.527177	0.0612166	0.252997	826.472	749.035	883.096	766.9	948.455	787.498	1898.96	1591.76	1233.22	736.526	1065.9	1427.31	1364.44	1107.93	892.913
ENSG00000038274	MAT2B	1.12388	0.000109626	0.002496	1118.86	1817.2	374.404	1843.48	1078.06	621.217	1304.51	1158.98	958.782	764.439	1002.61	1522.53	1344.33	1501.32	692.828
ENSG00000038295	TLL1	3.38122	2.09899e-06	0.000106159	459.806	426.61	8.89322	105	325.97	9.34161	143.554	287.538	324.226	72.9323	485.233	285.665	738.596	185.381	32.8496
ENSG00000038358	EDC4	0.0575799	0.860523	0.951033	1380.6	1956.48	2045.44	3599.25	1308.79	1237.76	1225.51	952.898	1525.02	1379.41	1645.57	1281.44	1527.02	1448.23	1562.85
ENSG00000038382	TRIO	0.0615956	0.846972	0.94473	1564.52	1459.69	2801.36	3702.92	1545.41	1533.89	2681.29	2030.43	1631.55	1343.39	1548.12	2468.67	1767.39	1954.76	1352.81
ENSG00000038427	VCAN	-2.5651	NA	NA	30.6538	2430.25	14.2291	21.2659	5.89102	18.6832	20.2325	2516.2	350.859	1164.22	31.1433	37.4809	48.0743	24.3693	94.5671
ENSG00000038532	CLEC16A	0.364932	0.483211	0.757968	837.083	605.369	1535.86	3740.13	2545.9	871.572	874.814	686.95	1413.86	688.805	1323.09	876.242	818.137	1564.86	664.956
ENSG00000038945	MSR1	-0.53711	0.309221	0.619619	23.5798	53.7375	48.0234	66.4558	32.4006	23.354	20.2325	97.1544	42.8441	129.657	31.1433	31.4029	39.3335	42.6462	73.6628
ENSG00000039068	CDH1	-3.0361	2.82899e-09	3.88821e-07	236.977	316.941	3717.36	81.0761	761.906	2064.5	337.208	242.395	775.826	4788.32	471.168	306.938	460.639	353.355	809.295
ENSG00000039123	MTREX	0.25557	0.0785812	0.292828	1367.63	1711.92	1333.98	1741.14	1538.54	1175.17	1455.77	1172.72	1250.59	1229.94	1772.15	1547.86	1258.67	1568.34	1472.26
ENSG00000039139	DNAH5	1.48993	0.00408062	0.0407117	64.8445	73.4778	45.3554	204.684	299.46	49.5105	52.0264	253.19	152.849	63.0279	138.638	154.988	89.156	229.768	60.722
ENSG00000039319	ZFYVE16	-0.231081	0.480495	0.756002	524.651	1119.71	1466.49	1895.32	901.326	953.779	851.691	826.303	810.565	1004.85	731.365	1439.47	811.145	707.58	1056.17
ENSG00000039523	RIPOR1	0.45926	0.213916	0.511192	291.211	235.787	220.552	509.052	195.386	169.083	96.3451	352.307	299.909	169.275	199.92	290.73	236.875	195.825	173.207
ENSG00000039537	C6	1.94422	0.160364	0.437999	2.35798	0	0.889322	6.64558	1.96367	0	5.78071	12.7576	4.6318	1.8008	0	4.05199	0.874078	379.465	0.995443
ENSG00000039560	RAI14	-1.33645	NA	NA	58.9495	53.7375	44.4661	22.595	29.4551	12.1441	71.2954	1561.34	92.6359	431.291	67.3097	38.4939	140.727	55.7012	79.6355
ENSG00000039650	PNKP	0.00188376	0.995701	0.997523	1157.77	1258.99	2330.91	4298.36	2203.24	1745.01	1380.63	1347.4	2086.62	1598.21	1560.18	2390.67	1752.53	1463.03	1829.62
ENSG00000039987	BEST2	3.08225	0.0101487	0.0776759	2.35798	4.38673	2.66796	57.152	99.1656	5.60497	117.541	51.0306	5.78975	2.7012	3.01387	7.09098	3.49631	18.277	1.99089
ENSG00000040199	PHLPP2	0.00473407	0.985261	0.993802	366.666	479.251	498.02	481.14	335.788	371.796	349.733	256.134	341.595	298.932	390.798	327.198	347.883	364.669	651.02
ENSG00000040275	SPDL1	0.384173	0.169572	0.451067	169.775	209.466	121.837	136.899	87.3835	134.519	184.983	139.353	98.4257	96.3427	152.703	213.742	189.675	136.642	121.444
ENSG00000040341	STAU2	-0.57547	0.0408675	0.196226	690.888	698.587	1320.64	390.76	684.34	1010.76	935.511	579.001	538.446	819.363	775.569	1218.63	749.085	585.733	609.211
ENSG00000040487	PQLC2	0.153748	0.577271	0.817604	582.421	441.963	451.775	235.254	612.666	483.895	599.267	366.046	758.457	527.634	517.381	591.59	711.5	561.364	531.567
ENSG00000040531	CTNS	0.571808	0.0704545	0.274232	310.075	178.759	247.231	304.368	438.881	204.581	588.669	395.487	576.659	320.542	358.65	234.002	394.209	377.724	434.013
ENSG00000040608	RTN4R	2.53303	0.000437641	0.00745758	69.5604	29.6104	2.66796	5.31647	50.0737	6.53913	14.4518	51.0306	35.8964	9.00399	17.0786	10.13	74.2967	37.4243	25.8815
ENSG00000040633	PHF23	-0.268729	0.395227	0.69095	867.737	648.14	787.939	676.52	1565.05	1480.65	1594.51	821.396	851.093	1085.88	827.809	682.76	644.196	1063.55	892.913
ENSG00000040731	CDH10	-2.18695	0.0683738	0.26927	4.71596	173.276	355.729	148.861	5.89102	250.355	85.7472	43.1797	3.47385	489.817	4.01849	5.06498	5.24447	23.499	459.895
ENSG00000040933	INPP4A	0.0931384	0.804712	0.926957	795.819	473.767	339.721	373.482	695.141	1176.11	541.46	965.655	640.346	470.909	802.693	461.926	1154.66	826.815	742.601
ENSG00000041353	RAB27B	-1.76056	NA	NA	18.8638	7.67678	1.77864	5.31647	5.89102	2.80248	25.0497	143.278	2.3159	90.9403	3.01387	4.05199	0.874078	21.7583	9.95443
ENSG00000041357	PSMA4	-1.07377	8.19761e-11	1.60284e-08	1555.09	1041.85	2523.89	914.432	1027	2366.23	1098.33	1388.62	1059.52	2174.46	948.364	1023.13	1071.62	1041.79	1255.25
ENSG00000041515	MYO16	3.80485	5.00029e-06	0.000207518	282.958	330.102	15.1185	350.887	47.1282	21.4857	377.673	186.458	428.441	6.30279	114.527	32.4159	166.949	74.8485	5.97266
ENSG00000041802	LSG1	0.41302	0.322252	0.633023	656.698	532.988	692.782	1394.24	833.58	653.913	2159.09	1098.14	588.238	568.152	600.764	574.369	602.24	604.88	553.466
ENSG00000041880	PARP3	0.572632	0.153911	0.427869	448.016	236.884	324.602	221.962	622.485	232.606	219.667	433.76	533.815	286.327	602.774	263.379	742.967	467.368	223.975
ENSG00000041982	TNC	-4.23172	NA	NA	9.43192	131.602	43.5768	41.2026	21.6004	54.1813	97.3086	22477	572.027	4809.03	31.1433	19.2469	19.2297	37.4243	11.9453
ENSG00000041988	THAP3	-0.161286	0.601312	0.830668	518.756	261.011	417.092	184.747	735.396	469.883	354.55	341.512	374.018	407.881	357.646	424.446	381.972	336.818	359.355
ENSG00000042062	RIPOR3	0.475196	0.579262	0.818894	16.5059	16.4502	42.6874	65.1267	76.5833	58.8522	15.4152	350.345	169.061	185.482	62.2866	111.43	73.4226	236.73	402.159
ENSG00000042088	TDP1	0.342322	0.20755	0.503503	208.681	255.527	163.635	309.684	235.641	183.096	289.035	211.973	156.323	143.163	158.73	212.729	173.068	136.642	138.367
ENSG00000042286	AIFM2	0.817108	0.0138935	0.096522	271.168	154.632	181.422	210	400.59	187.766	582.888	355.251	314.962	153.968	289.331	285.665	381.972	237.601	201.08
ENSG00000042317	SPATA7	0.619307	0.0128217	0.0915918	453.911	536.278	271.243	644.622	363.28	252.224	439.334	296.37	310.33	285.426	526.422	421.407	327.779	330.726	323.519
ENSG00000042429	MED17	0.0537986	0.703283	0.881066	603.643	573.565	694.56	538.292	586.157	541.813	729.333	571.15	591.712	450.199	606.792	584.499	523.573	566.586	527.585
ENSG00000042445	RETSAT	-0.255658	0.511836	0.776996	636.655	708.457	1072.52	539.621	1452.14	815.523	574.217	736.999	565.079	659.092	768.536	314.029	1281.4	428.203	527.585
ENSG00000042493	CAPG	-0.28862	0.527476	0.787975	214.576	268.687	474.008	752.28	577.32	521.262	137.774	549.56	314.962	407.881	690.176	180.313	319.913	290.691	299.628
ENSG00000042753	AP2S1	0.0751346	0.707105	0.882126	1680.06	2006.93	1207.7	1678.67	1397.15	1489.05	1471.19	1375.86	1065.31	1301.08	1441.63	1104.17	1370.56	1077.47	1179.6
ENSG00000042781	USH2A	-1.3456	0.104763	0.346065	15.3269	7.67678	66.6991	6.64558	13.7457	54.1813	53.9533	27.478	5.78975	8.10359	7.03236	16.2079	2.62224	40.9056	4.97722
ENSG00000042832	TG	2.83802	0.0189524	0.118513	0	7.67678	1.77864	21.2659	12.7639	2.80248	47.2091	24.5339	1.15795	5.40239	10.0462	4.05199	4.37039	134.901	16.9225
ENSG00000042980	ADAM28	-1.68037	NA	NA	31.8327	80.0579	66.6991	89.0508	36.328	70.9963	41.4284	212.955	41.6862	440.295	32.1479	56.7278	24.4742	18.277	489.758
ENSG00000043093	DCUN1D1	-0.225628	0.286641	0.595969	352.518	420.03	558.494	556.9	459.5	528.735	503.885	445.536	292.961	361.96	316.456	423.433	386.343	456.924	343.428
ENSG00000043143	JADE2	0.0873504	0.680405	0.871853	1914.68	2643.01	1850.68	3157.98	2155.13	2823.97	2879.76	1815.51	1963.88	2225.79	2295.56	2170.85	2236.77	2867.74	3223.25
ENSG00000043462	LCP2	-0.494491	0.481185	0.75629	21.2218	126.119	103.161	66.4558	24.5459	65.3913	13.4883	194.309	59.0554	158.47	35.1618	23.2989	99.6449	174.066	90.5853
ENSG00000043514	TRIT1	1.00342	0.0180827	0.114816	702.678	284.041	430.432	954.306	1546.39	265.302	1278.5	698.726	772.352	397.976	509.344	533.849	467.632	609.232	414.104
ENSG00000043591	ADRB1	2.75079	0.017201	0.111134	1.17899	52.6408	0.889322	3.98735	11.782	1.86832	3.85381	29.4407	1.15795	4.50199	15.0693	4.05199	47.2002	22.6286	1.99089
ENSG00000044090	CUL7	0.00516783	0.990056	0.995103	2327.33	4211.26	3307.39	1071.27	2131.57	1928.11	813.153	1258.1	3087.09	2091.63	2892.31	2575.04	3519.04	2864.26	2662.81
ENSG00000044115	CTNNA1	-0.87015	0.0011883	0.0157714	1942.98	2074.92	4075.76	2472.16	2394.7	4426.99	2032.88	3990.2	2414.32	6224.46	3190.68	1821.37	2684.29	3155.82	4052.45
ENSG00000044446	PHKA2	-0.427872	0.138001	0.403908	1236.76	662.397	2432.29	1492.6	1355.92	1345.19	856.508	962.711	1465.96	1080.48	1286.92	896.502	1309.37	1409.94	1510.09
ENSG00000044459	CNTLN	-0.0700192	0.837524	0.941294	222.829	412.353	387.744	219.304	113.893	207.384	368.038	341.512	223.484	217.897	307.414	195.508	236.875	277.636	179.18
ENSG00000044524	EPHA3	-0.514343	0.657397	0.86035	8.25293	263.204	313.931	142.215	2.94551	222.33	464.384	1475.96	62.5293	499.721	121.559	40.5199	13.9853	21.7583	283.701
ENSG00000044574	HSPA5	0.893226	0.00143977	0.0182531	29783.7	28689.2	14871.2	36080.2	17584.7	10175.8	23975.5	12834.2	30481.9	15664.2	31638.6	24829.6	22681.5	16992.4	26888.9
ENSG00000046604	DSG2	3.07314	0.000276547	0.00513209	506.966	159.019	6.22525	239.241	486.991	101.824	1651.36	674.192	207.273	28.8128	155.716	82.0527	108.386	254.137	79.6355
ENSG00000046647	GEMIN8	0.02257	0.925312	0.973234	446.837	232.497	409.977	445.254	435.936	346.574	248.57	339.55	437.705	297.132	372.715	290.73	358.372	416.018	258.815
ENSG00000046651	OFD1	0.278671	0.432839	0.721705	606.001	710.651	956.021	2138.55	957.291	640.835	1151.32	1018.65	1047.94	753.634	465.14	922.84	731.604	846.833	811.286
ENSG00000046653	GPM6B	-1.02298	0.147271	0.41958	206.323	58.1242	86.2642	122.279	50.0737	92.482	303.487	354.27	288.329	806.757	69.319	121.56	73.4226	221.064	71.6719
ENSG00000046774	MAGEC2	0.159294	NA	NA	114.362	0	99.604	2.65823	24.5459	0.934161	213.886	58.8814	2.3159	3.6016	0	23.2989	1.74816	764.151	0
ENSG00000046889	PREX2	1.61858	0.0844489	0.305931	9.43192	10.9668	16.0078	10.6329	31.4188	12.1441	76.1127	383.711	77.5826	58.5259	173.8	40.5199	159.082	67.0155	23.8906
ENSG00000047056	WDR37	-0.247782	0.361592	0.664145	1203.75	1489.3	1490.5	878.546	1653.41	1471.3	769.798	671.248	1105.84	1169.62	1347.2	813.436	1471.95	1143.62	1368.73
ENSG00000047188	YTHDC2	-0.00842688	0.977064	0.991503	449.195	562.598	854.638	1283.93	650.958	681.004	796.774	714.428	584.764	634.781	504.321	900.554	503.469	932.125	749.569
ENSG00000047230	CTPS2	-0.0561021	0.825152	0.936218	213.397	160.116	250.789	114.304	282.769	237.277	189.8	244.358	233.906	230.502	308.419	211.716	273.587	252.396	276.733
ENSG00000047249	ATP6V1H	0.302829	0.414803	0.707796	1992.49	3454.55	1422.91	958.293	2664.71	1753.42	1331.49	917.569	1384.91	1750.38	2870.21	2946.81	1825.95	1842.49	2119.3
ENSG00000047315	POLR2B	0.0906729	0.642053	0.852553	1825.08	1940.03	2186.84	1672.03	1948.95	1810.4	3284.41	1767.42	1714.92	1823.31	2361.87	2074.62	1962.31	1953.89	2284.54
ENSG00000047346	FAM214A	0.662986	0.0243276	0.13986	1200.21	1056.11	1149.89	2201.02	2428.08	1246.17	1138.8	1129.54	1760.08	831.068	2073.54	2327.87	1341.71	2076.61	1705.19
ENSG00000047365	ARAP2	0.149539	0.773336	0.91494	415.005	98.7015	416.203	873.23	438.881	153.202	202.325	230.619	207.273	289.928	241.109	159.04	196.668	399.482	352.387
ENSG00000047410	TPR	0.23677	0.244847	0.550119	1829.79	1672.44	1952.06	1464.69	1934.22	1747.82	2887.46	2059.87	1961.57	1680.14	2710.47	1791.99	2200.06	2661.47	2180.02
ENSG00000047457	CP	-0.268753	NA	NA	9.43192	4.38673	6.22525	2.65823	16.6912	4.67081	179.202	657.509	68.319	88.2391	2.00925	6.07798	5.24447	11.3143	8.95899
ENSG00000047578	KIAA0556	0.514909	0.229879	0.532018	597.748	554.922	784.382	3045.01	964.164	737.053	848.801	688.913	884.673	588.861	791.643	882.32	718.492	960.846	1126.84
ENSG00000047579	DTNBP1	0.275231	0.550679	0.801337	754.554	1319.31	569.166	531.647	545.901	384.874	193.654	329.736	426.125	493.419	707.254	404.186	984.212	544.828	265.783
ENSG00000047597	XK	-0.0341565	0.961121	0.98613	364.308	186.436	700.785	2134.56	452.627	403.558	326.61	160.943	206.115	244.008	354.632	262.366	181.808	499.57	139.362
ENSG00000047617	ANO2	0.387897	0.718486	0.887682	2.35798	1.09668	5.33593	21.2659	6.87286	5.60497	21.1959	124.632	61.3713	47.7211	6.02774	6.07798	8.74078	30.4616	16.9225
ENSG00000047621	C12orf4	0.402826	0.34928	0.655625	262.915	331.198	293.476	1250.7	378.989	324.154	305.414	284.594	340.437	273.721	295.359	354.549	277.083	362.928	272.751
ENSG00000047634	SCML1	-0.303395	0.743261	0.900747	5.89495	107.475	204.544	287.089	107.02	237.277	447.041	355.251	27.7908	189.984	11.0508	357.588	19.2297	76.5892	245.874
ENSG00000047644	WWC3	0.127193	0.783478	0.9181	301.822	93.2181	285.472	305.697	366.225	255.026	184.019	894.998	451.6	397.076	249.146	222.859	333.024	337.689	355.373
ENSG00000047648	ARHGAP6	1.35267	0.164515	0.444111	50.6966	55.9308	23.1224	29.2406	21.6004	31.7615	22.1594	530.914	82.2144	92.7411	28.1294	23.2989	74.2967	62.6639	526.589
ENSG00000047662	FAM184B	1.83315	0.00264677	0.0293216	497.534	86.638	23.1224	41.2026	84.438	28.959	118.505	56.9187	90.32	55.8247	125.578	137.768	128.49	103.569	67.6901
ENSG00000047849	MAP4	-0.392716	0.130204	0.391666	7051.54	4508.46	8138.18	3120.77	4857.15	5413.46	3982.91	5857.72	3389.32	5399.69	4813.15	3695.41	6955.92	4985.26	4521.3
ENSG00000047932	GOPC	0.267933	0.498172	0.768282	1071.7	3233.02	1015.61	930.382	696.123	1002.35	772.688	1000.98	898.569	853.578	1046.82	1064.66	694.892	1161.89	1259.24
ENSG00000047936	ROS1	1.98182	0.281437	0.591766	1.17899	2.19337	0.889322	1.32912	2.94551	0	0	0	1.15795	0	4.01849	0	1.74816	173.196	0
ENSG00000048028	USP28	-0.0894109	0.766528	0.912067	371.382	182.049	435.768	241.899	306.333	425.978	520.264	354.27	376.334	288.128	400.844	256.288	575.144	357.706	378.268
ENSG00000048052	HDAC9	-0.0198694	0.966069	0.987355	1091.75	1957.58	917.78	782.85	780.561	821.128	272.657	517.175	430.757	876.088	951.378	556.135	1645.89	745.874	584.325
ENSG00000048140	TSPAN17	0.675199	0.0514398	0.227908	1560.98	855.413	1036.06	1933.86	2325.97	780.025	1295.84	1055.94	1661.66	974.231	905.165	1404.01	820.76	2660.6	1342.85
ENSG00000048162	NOP16	0.709764	0.072854	0.279607	291.211	277.461	207.212	542.28	372.116	187.766	562.656	306.183	244.327	180.98	162.749	425.459	179.186	273.284	132.394
ENSG00000048342	CC2D2A	0.0425336	0.935697	0.977	415.005	450.737	483.791	179.431	226.804	583.851	441.261	558.392	375.176	497.02	314.447	853.956	472.876	396.001	1760.94
ENSG00000048392	RRM2B	-0.397385	0.196299	0.488888	536.441	1272.15	1210.37	947.66	1500.25	1390.97	1375.81	768.403	607.923	1415.43	1051.84	1237.88	730.73	799.835	1368.73
ENSG00000048405	ZNF800	0.186335	0.543186	0.796941	221.65	375.066	293.476	632.66	290.624	240.079	362.258	295.389	199.167	286.327	240.105	213.742	286.698	321.152	295.647
ENSG00000048462	TNFRSF17	0.161823	0.893234	0.96278	2.35798	6.5801	2.66796	271.14	0.981837	0.934161	0.963451	21.5899	1.15795	6.30279	3.01387	1.013	1.74816	3.48133	0
ENSG00000048471	SNX29	0.140394	0.523096	0.784737	464.522	523.118	614.521	423.988	527.247	405.426	480.762	640.826	492.128	450.199	548.524	824.579	534.062	630.12	390.214
ENSG00000048540	LMO3	1.32735	0.161876	0.440417	774.597	138.182	44.4661	1673.36	1447.23	30.8273	80.9299	258.097	164.429	835.57	630.903	606.785	145.971	764.151	2458.74
ENSG00000048544	MRPS10	0.200451	0.254997	0.561964	701.499	797.289	566.498	606.077	812.961	778.156	664.781	542.691	578.975	524.032	718.305	861.047	801.53	798.094	701.787
ENSG00000048649	RSF1	-0.499504	0.0281088	0.154794	1467.84	1297.38	2764.01	1016.77	1687.78	2258.8	2126.34	1647.7	1674.39	2401.36	2286.52	1634.98	2024.37	1798.98	2339.29
ENSG00000048707	VPS13D	0.283275	0.285709	0.59497	964.414	676.653	1134.77	984.875	1084.93	1032.25	1872.95	1640.83	1284.17	880.59	1163.35	923.853	1289.27	1510.03	1437.42
ENSG00000048740	CELF2	0.613386	0.150404	0.42304	696.783	1184.42	254.346	1103.17	1205.7	308.273	423.919	390.58	553.5	820.263	614.829	650.344	674.789	601.399	364.332
ENSG00000048828	FAM120A	-0.0768669	0.774735	0.91511	2059.7	3588.35	3230.02	3223.11	1910.66	2174.73	4038.79	2436.71	1654.71	2611.16	1973.08	2181.99	2672.93	2069.65	2591.14
ENSG00000048991	R3HDM1	-0.908455	0.00215013	0.024972	1063.45	749.035	1952.95	1124.43	719.687	1660	513.52	473.996	734.14	1221.84	696.203	952.217	909.916	1001.75	1365.75
ENSG00000049089	COL9A2	1.38379	0.11977	0.374658	99.0352	118.442	372.626	87.7217	92.2927	78.4695	2383.58	891.072	551.184	153.068	79.3652	309.977	950.123	266.321	476.817
ENSG00000049130	KITLG	-0.756894	0.258159	0.56532	8.25293	37.2872	70.2564	30.5697	29.4551	24.2882	62.6243	1169.78	141.27	188.183	46.2126	23.2989	111.008	51.3496	71.6719
ENSG00000049167	ERCC8	-0.146461	0.556726	0.805612	147.374	156.826	171.639	215.317	109.966	150.4	152.225	142.297	119.269	138.661	80.3698	156.001	108.386	122.717	157.28
ENSG00000049192	ADAMTS6	-1.6532	0.014283	0.0980069	1.17899	12.0635	38.2408	6.64558	2.94551	16.8149	13.4883	120.707	22.001	33.3148	6.02774	2.02599	6.11855	12.1846	15.9271
ENSG00000049239	H6PD	-0.269404	0.420977	0.71307	815.861	396.999	1574.99	1315.83	1216.5	1399.37	1068.47	2047.11	1188.06	1035.46	929.276	978.555	975.472	1054.84	1319.96
ENSG00000049245	VAMP3	0.0277697	0.901525	0.965026	2086.81	2350.19	1518.07	2438.93	2223.86	2133.62	1660.03	1834.16	1344.38	2173.56	2127.79	1473.91	1454.47	2139.27	2621
ENSG00000049246	PER3	-0.5527	0.196344	0.488888	825.293	1662.57	3567.96	502.406	2390.77	2021.52	2539.66	1534.84	943.729	1327.19	2181.04	1964.2	1223.71	1871.21	1220.41
ENSG00000049283	EPN3	1.36742	0.0492423	0.221724	15.3269	9.87015	19.5651	10.6329	63.8194	12.1441	78.0396	98.1357	66.0031	17.1076	57.2635	32.4159	27.0964	34.8133	9.95443
ENSG00000049323	LTBP1	2.12831	0.0382109	0.187263	407.931	109.668	56.0273	2764.56	2336.77	69.1279	2522.32	7280.69	1401.12	1083.18	590.718	184.365	314.668	2980.89	237.911
ENSG00000049449	RCN1	1.77324	9.37933e-05	0.00223277	9196.13	3428.23	1723.51	3717.54	5614.14	1923.44	10065.2	5527	8896.52	1464.05	3714.09	7328.02	4685.93	6558.82	1149.74
ENSG00000049540	ELN	1.54691	0.114675	0.365103	2939.22	881.733	229.445	35.8861	100.147	58.8522	245.68	1856.73	1780.93	961.626	499.297	1044.4	3791.75	1299.4	133.389
ENSG00000049541	RFC2	-0.301363	0.224638	0.525143	412.647	434.287	468.672	342.912	387.826	428.78	336.245	282.631	181.798	369.164	329.516	295.795	501.721	333.337	271.756
ENSG00000049618	ARID1B	-0.126665	0.648441	0.855885	1873.42	2079.31	2335.36	1285.26	1126.17	1731	1252.49	1765.46	1846.93	1645.03	2622.06	1519.49	1249.06	2694.55	1610.63
ENSG00000049656	CLPTM1L	0.388543	0.0981724	0.333203	1912.32	2570.63	1775.09	3457.03	2213.06	1507.74	2658.16	1768.41	1953.46	1659.43	1694.8	2329.89	1490.3	1622.3	2212.87
ENSG00000049759	NEDD4L	-1.17735	0.0223965	0.133062	536.441	375.066	1956.51	1842.16	583.211	2192.48	560.729	454.368	627.609	963.427	447.057	543.979	569.899	489.126	2013.78
ENSG00000049768	FOXP3	1.29707	0.0356465	0.179758	27.1168	7.67678	10.6719	22.595	18.6549	14.9466	33.7208	20.6085	31.2646	16.2072	48.2219	104.339	27.9705	51.3496	16.9225
ENSG00000049769	PPP1R3F	0.132557	0.718114	0.887558	2201.18	1244.74	1616.79	3288.23	1853.71	1815.08	1011.62	705.596	1139.42	1294.77	1860.56	2517.3	1481.56	1740.66	1683.29
ENSG00000049860	HEXB	0.805427	0.00621874	0.0548686	1341.69	2829.44	531.814	1240.07	1243.99	775.354	1200.46	1485.77	1342.06	1102.99	1166.37	1476.95	1124.06	1403.84	994.448
ENSG00000049883	PTCD2	-0.0643389	0.770235	0.913763	253.483	302.685	305.927	168.798	236.623	306.405	378.636	239.451	229.274	277.323	338.558	307.951	343.513	331.596	268.77
ENSG00000050030	NEXMIF	0.170168	0.596265	0.827955	453.911	524.215	455.333	240.57	631.321	311.076	481.726	231.6	350.859	356.558	551.538	238.054	356.624	530.902	461.886
ENSG00000050130	JKAMP	0.442301	0.108747	0.354319	1502.03	3256.05	1391.79	2115.95	1575.85	1609.56	3259.36	1580.97	1555.13	1310.08	1864.58	1944.95	1648.51	1459.55	1670.35
ENSG00000050165	DKK3	0.367234	0.632605	0.848175	2572.56	164.502	2542.57	85.0635	2137.46	369.928	2291.09	3263.01	1791.35	1143.51	1947.96	943.1	1688.72	3412.57	629.12
ENSG00000050327	ARHGEF5	1.64378	0.0491445	0.221485	155.627	12.0635	59.5845	95.6964	594.993	117.704	690.795	290.482	640.346	171.076	828.814	50.6498	464.136	460.405	69.681
ENSG00000050344	NFE2L3	0.183554	0.762802	0.910433	57.7705	66.8977	126.284	312.342	66.7649	70.9963	36.6112	102.061	94.9518	101.745	43.1988	294.782	60.3114	81.8112	142.348
ENSG00000050393	MCUR1	-0.330434	0.354068	0.658602	528.188	867.476	634.976	769.559	637.212	901.466	227.375	404.319	324.226	705.012	708.259	426.472	779.678	620.546	837.168
ENSG00000050405	LIMA1	-1.53398	5.12695e-05	0.00139153	627.223	2172.53	4764.99	2315.32	1062.35	3264.89	1306.44	1964.68	948.36	3567.38	1052.84	1317.91	1069.87	621.417	1561.85
ENSG00000050426	LETMD1	0.425294	0.175449	0.459483	1975.99	4810.05	1743.07	2543.93	2276.88	1559.12	1978.93	1359.18	2057.68	1741.37	2078.56	2810.05	2055.83	1510.03	1635.51
ENSG00000050438	SLC4A8	-0.173311	0.591169	0.825089	2031.4	2929.24	4407.48	3605.89	3344.14	2940.74	3185.17	1262.03	1735.77	2041.2	2790.84	3410.76	2115.27	3076.62	3819.52
ENSG00000050555	LAMC3	3.1517	0.000116085	0.00260861	254.662	29.6104	18.6758	41.2026	1138.93	45.7739	263.022	267.911	575.501	82.8367	225.035	897.515	805.026	631.861	104.522
ENSG00000050628	PTGER3	-1.44156	0.152237	0.425986	86.0663	10.9668	11.5612	58.4811	7.8547	363.389	127.176	249.265	28.9487	88.2391	25.1156	14.182	5.24447	13.055	55.7448
ENSG00000050748	MAPK9	0.186716	0.473984	0.750821	1708.36	1764.56	1438.03	2143.87	1419.74	1159.29	1098.33	891.072	1073.42	1106.59	1136.23	1916.59	1189.62	1372.51	1151.73
ENSG00000050767	COL23A1	1.75234	0.090903	0.318607	5.89495	6.5801	7.11457	2.65823	1.96367	5.60497	19.269	54.956	12.7374	2.7012	1.00462	69.8968	13.1112	10.444	8.95899
ENSG00000050820	BCAR1	-0.718759	0.0191217	0.119218	2508.89	3013.69	3583.08	4173.43	1818.36	3525.52	945.146	2026.5	2153.79	4359.73	1850.51	2255.94	2397.6	2359.47	2373.14
ENSG00000051009	FAM160A2	-0.114661	0.703543	0.881173	940.834	598.789	1477.16	1230.76	1214.53	1080.82	1544.41	1284.6	1477.54	850.877	832.832	1051.49	585.633	838.129	995.443
ENSG00000051108	HERPUD1	0.901125	0.0141735	0.0975452	1570.42	1488.2	1068.08	1427.47	4316.16	913.61	813.153	2155.06	2202.42	1162.41	2621.06	1485.05	2127.51	1824.21	1455.34
ENSG00000051128	HOMER3	-1.29269	0.00473465	0.0455687	55.4126	66.8977	92.4894	58.4811	24.5459	71.9304	35.6477	406.282	99.5836	264.717	56.2589	45.5848	108.386	42.6462	42.8041
ENSG00000051180	RAD51	0.633578	0.284977	0.594184	63.6655	37.2872	52.47	31.8988	68.7286	13.0783	29.867	37.2916	34.7385	20.7092	48.2219	19.2469	122.371	27.8506	13.9362
ENSG00000051341	POLQ	1.49723	0.0541532	0.235297	48.3386	19.7403	24.901	9.30382	68.7286	19.6174	85.7472	44.1611	19.6851	5.40239	60.2774	23.2989	152.09	24.3693	6.9681
ENSG00000051382	PIK3CB	0.469807	0.0429075	0.203452	694.425	711.747	440.214	564.875	822.78	522.196	789.067	596.665	431.915	477.211	945.35	473.069	761.322	678.859	502.699
ENSG00000051523	CYBA	-0.725017	0.291567	0.600941	136.763	818.126	400.195	337.596	139.421	348.442	145.481	1496.57	440.021	1255.16	143.661	199.56	327.779	241.082	423.063
ENSG00000051596	THOC3	1.53391	0.000176279	0.00367221	679.099	1212.93	249.899	828.04	741.287	283.051	482.689	343.475	515.287	278.223	833.837	1426.3	717.618	1280.26	334.469
ENSG00000051620	HEBP2	0.207896	0.623589	0.842999	996.247	1577.03	507.803	357.532	458.518	751.066	529.898	843.967	776.984	674.399	764.518	747.592	258.727	1058.32	562.425
ENSG00000051825	MPHOSPH9	0.259895	0.439766	0.72628	336.012	370.679	476.676	1071.27	444.772	374.599	493.287	298.333	391.387	334.948	447.057	443.693	449.276	606.621	331.483
ENSG00000052126	PLEKHA5	-0.407169	0.134299	0.398673	998.605	629.496	969.361	595.444	630.339	1280.73	853.618	1296.37	569.711	1273.16	784.61	963.36	1168.64	959.976	1174.62
ENSG00000052344	PRSS8	-2.41327	0.00181012	0.021825	4.71596	2.19337	10.6719	0	5.89102	14.0124	0.963451	89.3035	0	17.1076	1.00462	3.03899	2.62224	1.74066	4.97722
ENSG00000052723	SIKE1	0.266962	0.347563	0.653846	557.663	516.538	374.404	311.013	343.643	337.232	668.635	634.938	319.594	397.076	332.53	270.47	458.891	403.834	517.63
ENSG00000052749	RRP12	-0.235042	0.384992	0.68362	727.437	1018.82	1561.65	1038.04	1455.08	850.087	831.459	596.665	897.411	923.809	1253.77	675.669	840.863	1006.1	995.443
ENSG00000052795	FNIP2	0.985703	0.0112708	0.0834813	400.857	329.005	293.476	623.356	1079.04	262.499	975.976	736.018	325.384	280.024	558.57	360.627	431.795	495.219	305.601
ENSG00000052802	MSMO1	0.945076	0.0123961	0.0894615	911.36	1312.73	333.496	1523.17	840.453	420.373	817.007	615.311	519.919	470.909	438.015	894.476	379.35	585.733	597.266
ENSG00000052841	TTC17	0.585905	0.0058066	0.0524668	1924.11	2364.45	1511.85	2171.78	1832.11	1321.84	2741.98	1696.77	2623.91	1156.11	1823.39	2129.32	1592.57	1726.74	1329.91
ENSG00000052850	ALX4	-3.62046	NA	NA	1.17899	1.09668	3.55729	5.31647	0.981837	0.934161	0	464.182	4.6318	110.749	4.01849	1.013	2.62224	0.870332	13.9362
ENSG00000053108	FSTL4	4.42206	5.40794e-11	1.09114e-08	548.231	173.276	30.2369	862.597	818.852	31.7615	883.485	326.792	297.593	16.2072	411.895	450.784	512.21	1387.31	31.8542
ENSG00000053254	FOXN3	0.0863245	0.847299	0.94473	452.732	779.742	390.412	272.469	142.366	457.739	340.098	1041.22	323.068	509.626	461.122	478.134	701.011	284.598	488.763
ENSG00000053328	METTL24	-1.71121	0.00293383	0.0315974	20.0428	10.9668	70.2564	6.64558	13.7457	65.3913	27.9401	27.478	35.8964	72.9323	10.0462	20.2599	8.74078	12.1846	60.722
ENSG00000053371	AKR7A2	-0.342065	0.181419	0.468248	1457.23	1106.55	1250.39	676.52	1432.5	1273.26	724.515	800.787	752.667	1184.02	929.276	732.397	1144.17	825.074	1117.88
ENSG00000053372	MRTO4	-0.0538053	0.845345	0.944195	623.686	481.444	578.948	538.292	559.647	601.6	1051.13	682.043	518.761	562.749	352.623	582.473	506.091	441.258	380.259
ENSG00000053438	NNAT	-1.73551	0.00293572	0.0315998	103400	165366	341529	4565.52	220150	493118	129324	61985.5	93299.4	329434	149518	117725	123464	99787.9	129721
ENSG00000053501	USE1	-0.306759	0.413508	0.706815	664.951	979.338	566.498	1205.51	683.359	805.247	317.939	496.567	548.868	801.355	402.854	338.341	395.958	489.997	506.681
ENSG00000053524	MCF2L2	-0.175352	0.587579	0.823267	519.935	349.842	739.026	707.09	602.848	653.913	377.673	234.544	620.661	533.036	707.254	716.189	712.374	463.016	811.286
ENSG00000053702	NRIP2	0.0635003	0.847731	0.944846	130.868	184.243	204.544	150.19	202.258	171.886	102.126	260.06	238.538	221.498	127.587	288.704	242.12	241.952	329.492
ENSG00000053747	LAMA3	0.262445	0.601971	0.831233	1568.06	848.833	837.741	532.976	755.033	990.211	590.596	698.726	436.547	747.331	1887.69	836.735	2858.24	763.281	578.353
ENSG00000053770	AP5M1	0.300747	0.292215	0.601753	1008.04	1748.11	903.551	2032.22	1150.71	1101.38	1713.98	832.191	831.408	1058.87	1548.12	1178.12	936.138	1022.64	1095.98
ENSG00000053900	ANAPC4	-0.251153	0.121765	0.379078	380.814	396.999	638.533	498.419	528.228	524.999	487.506	520.119	522.235	600.566	473.177	666.552	460.639	446.48	547.494
ENSG00000053918	KCNQ1	0.153714	0.808815	0.928571	20.0428	72.3811	30.2369	53.1647	21.6004	37.3664	19.269	141.315	27.7908	85.5379	51.2357	31.4029	131.112	77.4595	33.8451
ENSG00000054116	TRAPPC3	-0.0199879	0.944403	0.979683	1774.38	1221.71	1993.86	3123.42	3031.91	2122.41	2079.13	1345.44	1666.29	1590.1	2112.72	1560.01	1575.96	1543.1	1479.23
ENSG00000054118	THRAP3	-0.158283	0.360079	0.663034	3441.47	2544.3	3519.93	2123.93	3494.36	3440.52	3659.19	2710.51	2659.81	3462.03	3888.89	3090.65	3402.79	3269.84	3067.96
ENSG00000054148	PHPT1	-0.916149	0.0060598	0.0539325	2309.64	5257.5	5902.43	2466.84	1355.92	4428.86	3528.16	2007.86	2239.47	4188.66	2030.34	2792.83	1950.94	1763.29	3075.92
ENSG00000054179	ENTPD2	-0.62469	0.282286	0.592371	199.249	156.826	287.251	73.1014	148.257	99.9552	70.3319	87.3408	531.499	448.399	110.508	340.367	193.171	146.216	111.49
ENSG00000054219	LY75	-0.739434	0.214959	0.512689	3.53697	7.67678	16.0078	13.2912	4.90919	6.53913	5.78071	176.644	15.0533	22.51	6.02774	4.05199	6.99263	11.3143	19.9089
ENSG00000054267	ARID4B	-0.100305	0.567989	0.81222	1036.33	1433.36	1369.56	910.445	1014.24	1423.66	1623.42	1337.59	1318.9	1224.54	1037.78	1314.87	1230.7	1307.24	1423.48
ENSG00000054282	SDCCAG8	-0.31334	0.127977	0.388728	536.441	418.933	613.632	554.242	712.814	867.836	843.02	645.733	510.656	736.526	725.337	621.98	533.188	524.81	510.662
ENSG00000054356	PTPRN	-0.133411	0.731563	0.895266	11102.6	7536.41	6260.82	2381.78	4144.33	9702.2	6145.86	2935.24	8776.1	5522.15	7040.39	5430.67	8485.55	6321.22	8049.15
ENSG00000054392	HHAT	-0.820076	0.203171	0.497205	64.8445	15.3536	273.022	75.7596	173.785	52.313	80.9299	151.129	84.5303	86.4383	63.2912	11.143	58.5633	81.8112	71.6719
ENSG00000054523	KIF1B	-0.372313	0.205345	0.50041	2703.43	1596.77	2774.68	1372.98	3450.18	3480.68	3249.72	1842.99	1529.65	2474.3	2368.9	1976.36	2755.97	2572.7	1553.89
ENSG00000054598	FOXC1	-1.51135	NA	NA	24.7588	43.8673	56.0273	18.6076	64.8013	32.6956	20.2325	4994.13	453.916	750.032	47.2173	43.5589	124.993	106.18	154.294
ENSG00000054611	TBC1D22A	-0.305955	0.0436049	0.205366	875.99	700.781	907.997	774.875	923.909	966.857	567.473	756.626	678.558	920.208	786.619	797.228	821.634	591.825	769.478
ENSG00000054654	SYNE2	0.527153	0.0553465	0.238028	5372.66	5242.15	5246.11	8405.33	5580.76	4039.31	6098.65	3972.53	5470.15	3939.24	7449.28	11110.5	6977.77	6289.89	4262.49
ENSG00000054690	PLEKHH1	-1.82751	0.00419964	0.0415495	858.305	212.757	5261.23	1113.8	404.517	1099.51	219.667	265.948	508.34	866.184	565.602	417.355	798.908	854.666	1925.19
ENSG00000054793	ATP9A	0.283576	0.334385	0.643591	3404.92	3757.24	2560.36	1701.27	2486.99	2734.29	5413.63	2895.99	2321.69	2616.56	3239.91	2274.18	4371.27	2677.14	3971.82
ENSG00000054803	CBLN4	-3.87591	NA	NA	0	0	1.77864	1.32912	0	1.86832	0	530.914	5.78975	65.7291	0	0	2.62224	6.09232	1.99089
ENSG00000054965	FAM168A	-1.21064	0.000373308	0.00659233	937.297	1292.99	3986.83	572.849	920.963	2205.55	1945.21	1758.59	1028.26	1744.97	1084.99	775.955	1114.45	951.272	1333.89
ENSG00000054967	RELT	-1.08333	0.0500558	0.224382	126.152	106.378	489.127	25.2532	98.1837	95.2844	184.983	140.334	152.849	175.578	105.485	43.5589	129.364	244.563	76.6491
ENSG00000054983	GALC	0.381842	0.0643654	0.260511	759.27	1131.78	717.683	1488.61	1221.41	822.996	1342.09	881.259	977.309	911.204	1094.03	919.801	791.915	1027.86	1145.76
ENSG00000055044	NOP58	0.440226	0.127672	0.388173	1261.52	1283.12	851.97	2456.21	1571.92	1103.24	763.053	1030.43	1746.19	1032.76	1087	1584.33	1002.57	1248.06	1185.57
ENSG00000055070	SZRD1	-0.369439	0.162872	0.441543	1886.38	993.595	2257.1	1581.65	2104.08	2239.18	2552.18	2748.78	1306.17	2386.06	1386.38	1444.53	1618.79	1879.05	1806.73
ENSG00000055118	KCNH2	-0.192037	0.607931	0.835205	6037.61	7117.47	9136.89	13946.4	7383.42	6555.01	5294.17	2215.9	7399.3	7092.44	7391.01	6207.64	6004.92	7064.48	3718.98
ENSG00000055130	CUL1	0.14097	0.622617	0.842446	1966.56	2300.84	2093.46	4718.36	2344.63	2053.29	2216.9	1720.32	1654.71	1858.42	2064.5	1783.89	1558.48	2056.59	2104.37
ENSG00000055147	FAM114A2	0.291579	0.245014	0.55026	324.222	462.8	377.072	437.279	560.629	368.06	698.502	506.38	317.278	334.948	372.715	384.939	307.676	538.735	375.282
ENSG00000055163	CYFIP2	1.51694	9.92693e-05	0.00231865	9811.56	6201.74	4354.12	9862.05	9891.03	3387.27	9595.98	3632	14835.6	2432.88	13003.8	10709.4	10321.1	14800	3803.59
ENSG00000055208	TAB2	0.0920085	0.773186	0.91494	1453.7	1911.52	1162.34	1505.89	782.524	1153.69	1189.86	1973.51	848.777	1260.56	1047.82	1182.17	588.255	1584.87	1180.6
ENSG00000055211	GINM1	0.234863	0.696183	0.878794	1263.88	7163.53	961.357	1329.12	733.432	1553.51	655.147	1356.24	1641.97	1838.61	1097.05	1726.15	613.603	1221.95	1691.26
ENSG00000055332	EIF2AK2	-0.414765	0.180701	0.467194	990.352	818.126	1141.89	688.482	863.035	1297.55	484.616	967.618	673.926	1302.88	1020.7	751.644	946.627	1147.1	1875.42
ENSG00000055483	USP36	0.19046	0.471979	0.749899	1235.58	1300.67	1369.56	1763.74	1346.1	1263.92	2896.13	1752.7	1347.85	1287.57	1140.25	1362.48	1217.59	1097.49	1437.42
ENSG00000055609	KMT2C	-0.118379	0.672456	0.867921	1147.16	1999.25	2574.59	3478.3	1598.43	2079.44	2479.92	1816.49	1497.23	1791.79	1838.46	1554.95	1735.92	2086.18	2521.46
ENSG00000055732	MCOLN3	-1.01813	0.0134204	0.0945843	736.869	288.428	1555.42	396.077	426.117	1014.5	316.975	193.327	588.238	786.949	841.874	684.786	940.508	611.843	604.234
ENSG00000055813	CCDC85A	0.585357	0.442341	0.728377	1018.65	655.817	554.047	128.924	83.4562	156.939	236.046	215.899	290.645	244.908	809.726	184.365	1693.96	289.82	129.408
ENSG00000055917	PUM2	-0.260515	0.058559	0.246423	1707.18	1900.55	2365.6	1508.55	2009.82	2145.77	1522.25	1924.44	1416.17	1939.46	2051.44	1921.65	1957.06	1888.62	1728.09
ENSG00000055950	MRPL43	-0.311601	0.211217	0.508315	1428.94	1191	1372.22	1213.48	2055.97	1618.9	784.249	828.265	1113.95	1613.51	1055.86	1241.93	1278.78	1104.45	1543.93
ENSG00000055955	ITIH4	0.132219	0.812462	0.929799	31.8327	6.5801	45.3554	21.2659	20.6186	31.7615	21.1959	35.3289	98.4257	24.3108	42.1941	51.6628	32.3409	35.6836	47.7813
ENSG00000056050	HPF1	-0.0430527	0.848476	0.945064	448.016	565.888	474.898	392.089	448.7	458.673	478.835	367.028	252.433	386.271	439.02	607.798	386.343	388.168	349.401
ENSG00000056097	ZFR	0.315955	0.0920226	0.320004	2138.69	2115.5	1812.44	2954.63	1958.77	1746.88	2961.65	1656.53	1611.87	1731.47	2262.41	2288.36	2343.4	2071.39	1982.92
ENSG00000056277	ZNF280C	-0.0146162	0.958467	0.985059	44.8016	41.674	70.2564	87.7217	63.8194	68.1938	99.2355	89.3035	56.7395	59.4263	63.2912	67.8708	58.5633	54.8309	55.7448
ENSG00000056487	PHF21B	0.277428	0.503908	0.772794	1308.68	603.176	1146.34	1124.43	1453.12	761.341	387.307	349.363	1657.03	612.271	960.419	1052.5	898.553	1340.31	1083.04
ENSG00000056558	TRAF1	0.630503	0.0767071	0.288484	186.281	265.397	289.03	534.305	253.314	338.166	333.354	519.138	585.922	241.307	592.727	614.889	358.372	503.052	631.111
ENSG00000056586	RC3H2	0.225256	0.366971	0.669679	904.286	1367.56	1076.97	1472.66	736.378	1035.98	1759.26	1213.94	759.615	812.16	983.525	1044.4	1068.12	1199.32	1168.65
ENSG00000056736	IL17RB	1.53714	0.0304573	0.162719	132.047	53.7375	49.802	22.595	320.079	37.3664	130.066	109.912	79.8985	45.9203	60.2774	72.9358	406.446	134.031	21.8998
ENSG00000056972	TRAF3IP2	-0.832484	0.134526	0.398846	140.3	826.899	547.822	513.039	152.185	436.253	145.481	302.258	167.903	686.104	271.248	323.146	73.4226	349.873	486.772
ENSG00000056998	GYG2	-0.594952	NA	NA	163.88	3.29005	3.55729	0	6.87286	2.80248	6.74416	265.948	18.5272	126.956	3.01387	8.10397	111.008	6.09232	6.9681
ENSG00000057019	DCBLD2	-1.48143	0.000203433	0.00409618	381.993	284.041	1716.39	269.811	577.32	887.453	792.92	565.262	303.383	687.004	267.23	181.326	368.861	364.669	356.369
ENSG00000057149	SERPINB3	3.81709	0.0389885	0.189556	0	2.19337	0	3.98735	76.5833	1.86832	0.963451	398.431	8.10565	0	3.01387	0	1.74816	2.61099	2.98633
ENSG00000057252	SOAT1	-0.94309	0.0312703	0.165616	437.405	429.9	940.013	244.557	509.573	1231.22	671.526	496.567	580.133	1058.87	431.988	279.587	498.225	510.014	1629.54
ENSG00000057294	PKP2	1.50962	0.0268312	0.149809	1196.68	241.27	568.276	6670.84	1419.74	1266.72	5667.98	1469.09	737.614	667.195	1426.56	3883.83	1548.87	1504.8	2731.5
ENSG00000057593	F7	1.39269	0.081033	0.297838	35.3697	14.2569	3.55729	6.64558	4.90919	19.6174	37.5746	39.2543	22.001	19.8088	27.1248	79.0137	32.3409	128.809	22.8952
ENSG00000057608	GDI2	0.154283	0.631088	0.847608	4107.6	6615.19	2906.3	2963.93	4453.61	2926.73	1865.24	2658.5	2709.6	3569.18	4475.59	2313.68	3446.49	3703.26	2541.37
ENSG00000057657	PRDM1	-0.194754	0.769151	0.913216	9.43192	52.6408	40.0195	17.2785	11.782	22.4199	15.4152	101.08	34.7385	62.1275	25.1156	23.2989	53.3188	19.1473	71.6719
ENSG00000057663	ATG5	0.0946989	0.727532	0.892925	405.573	693.104	367.29	521.014	327.934	400.755	298.67	401.375	343.911	370.964	492.265	363.666	232.505	344.651	442.972
ENSG00000057704	TMCC3	-0.50629	0.386288	0.684795	327.759	1131.78	860.863	376.14	408.444	566.102	104.053	569.187	289.487	863.482	575.649	111.43	752.582	626.639	1176.61
ENSG00000057757	PITHD1	-0.19446	0.472883	0.750253	3318.86	3996.31	2355.81	2858.93	3325.48	3615.2	2186.07	1549.56	2137.57	2900.18	2223.23	2611.51	2945.64	2051.37	1806.73
ENSG00000057935	MTA3	-0.130223	0.687577	0.874687	1790.89	1397.17	1616.79	851.964	1372.61	1461.03	650.33	675.174	970.362	1139	1613.42	1281.44	1680.85	1240.22	1886.36
ENSG00000058056	USP13	0.164118	0.652648	0.858263	809.967	473.767	731.022	368.165	573.393	519.394	685.977	512.268	326.542	432.191	800.684	377.848	895.93	537.865	1177.61
ENSG00000058063	ATP11B	0.373255	0.301132	0.611223	575.347	1176.74	1111.65	2259.5	1267.55	720.238	1785.28	1017.67	724.876	762.638	1151.3	763.799	768.315	984.345	969.562
ENSG00000058085	LAMC2	-2.17032	2.42535e-05	0.000779648	424.437	62.5109	1463.82	644.622	254.296	1606.76	587.705	367.028	441.179	1713.46	399.84	200.573	216.771	120.976	6634.63
ENSG00000058091	CDK14	-1.01198	0.00261219	0.0290523	762.807	880.637	2222.41	1263.99	592.048	1545.1	705.246	765.459	430.757	1021.05	508.339	610.837	659.929	1098.36	1220.41
ENSG00000058262	SEC61A1	0.155764	0.636059	0.849994	4827.97	4964.68	7102.12	5320.45	13283.3	4736.2	9512.16	5842.02	6743.9	5328.56	6189.48	3562.71	5396.56	5635.4	5217.12
ENSG00000058272	PPP1R12A	-0.127312	0.472579	0.750186	1328.72	1494.78	1418.47	1882.03	1216.5	1826.29	1621.49	1848.88	1287.64	1634.22	1143.26	1761.6	1263.92	1547.45	1472.26
ENSG00000058335	RASGRF1	5.82977	1.16882e-06	6.57801e-05	3449.73	540.665	25.7903	11.962	61.8557	10.2758	20.2325	258.097	119.269	6.30279	1377.34	50.6498	3044.42	507.403	200.084
ENSG00000058404	CAMK2B	0.5687	0.131032	0.393344	10956.4	12424.3	4808.56	7262.29	6315.18	6130.9	5763.37	3131.51	11361.8	5807.57	10830.8	12248.1	7846.6	7411.74	3804.58
ENSG00000058453	CROCC	-0.732431	0.0333844	0.172629	1149.52	424.416	2735.55	861.268	1312.72	1443.28	897.937	1920.52	1316.59	1626.12	983.525	1642.07	1227.21	1264.59	974.539
ENSG00000058600	POLR3E	-0.0910889	0.730022	0.894646	1051.66	1191	1985.86	2238.23	1562.1	1092.03	1248.63	979.394	1358.27	1146.21	1069.92	1254.09	1080.36	1189.74	1642.48
ENSG00000058668	ATP2B4	-1.18646	0.0739885	0.282253	249.946	167.793	1494.06	501.077	376.044	761.341	316.975	2252.21	577.817	1591.91	188.869	187.404	456.269	437.777	1049.2
ENSG00000058673	ZC3H11A	0.104247	0.458078	0.740705	2751.76	2770.22	3049.48	2909.44	3361.81	3268.63	4242.08	3365.07	3681.12	3136.99	3168.58	3730.87	3417.65	3403	3848.38
ENSG00000058729	RIOK2	0.556505	0.147594	0.419997	359.592	1164.68	335.274	1027.41	469.318	434.385	428.736	427.872	401.808	325.944	426.965	544.992	344.387	510.014	341.437
ENSG00000058799	YIPF1	-0.244437	0.280057	0.590435	393.783	298.298	420.649	297.722	517.428	507.25	461.493	333.661	419.178	436.693	355.636	267.431	303.305	440.388	517.63
ENSG00000058804	NDC1	0.235288	0.426959	0.718263	161.522	157.922	150.295	167.469	162.003	148.532	319.866	241.414	195.693	147.665	155.716	92.1827	169.571	131.42	147.326
ENSG00000058866	DGKG	3.03886	4.41621e-06	0.00018822	914.897	558.212	301.48	418.672	1531.67	68.1938	3039.69	1095.19	851.093	81.9363	2501.51	710.111	972.849	2087.93	165.244
ENSG00000059122	FLYWCH1	-0.0946806	0.757031	0.907403	2440.51	2380.9	2015.2	1855.45	1610.21	2447.5	694.648	1652.61	2545.17	2194.27	2880.25	2553.76	2193.94	2157.55	1971.97
ENSG00000059145	UNKL	0.671961	0.00871274	0.0695772	851.231	656.913	546.933	717.723	482.082	546.484	711.991	886.166	1206.58	460.104	616.838	1175.08	915.16	700.617	980.512
ENSG00000059377	TBXAS1	-0.315475	0.480928	0.756074	54.2336	207.273	121.837	158.165	80.5106	98.0869	34.6842	86.3594	88.0041	161.171	83.3837	58.7538	118.875	91.3848	164.248
ENSG00000059378	PARP12	0.266735	0.509626	0.776039	433.869	133.795	257.903	244.557	793.324	340.969	381.527	610.404	435.389	468.207	317.461	450.784	341.765	641.434	349.401
ENSG00000059573	ALDH18A1	0.758081	0.00456904	0.0443936	1387.67	2042.02	966.693	1073.93	1676	638.032	825.678	919.532	1450.91	775.243	1664.66	937.022	1311.99	1309.85	1502.12
ENSG00000059588	TARBP1	0.117539	0.775822	0.91511	781.671	517.634	743.473	571.52	454.591	595.995	358.404	595.684	627.609	369.164	333.535	1582.3	669.544	570.067	352.387
ENSG00000059691	GATB	-0.188226	0.413809	0.707119	366.666	309.265	406.42	188.735	361.316	386.743	447.041	281.65	332.331	387.171	459.112	384.939	421.306	301.135	287.683
ENSG00000059728	MXD1	-0.172639	0.48077	0.756013	381.993	254.43	346.835	260.507	314.188	480.159	381.527	407.263	357.806	459.203	322.484	556.135	450.15	349.003	526.589
ENSG00000059758	CDK17	-0.0916073	0.740179	0.899771	587.137	637.173	753.255	497.09	471.282	591.324	628.17	810.601	576.659	630.279	526.422	1136.58	492.98	666.674	382.25
ENSG00000059769	DNAJC25	0.500424	0.300482	0.610426	258.199	859.8	253.457	668.546	157.094	212.989	257.242	207.066	238.538	210.693	241.109	354.549	209.779	203.658	178.184
ENSG00000059804	SLC2A3	0.236488	0.820434	0.934224	113.183	628.399	516.696	9838.12	335.788	531.538	1067.5	4097.17	137.796	817.562	88.4068	44.5719	76.9189	69.6265	1662.39
ENSG00000059915	PSD	-0.638157	0.102557	0.342342	6714.35	5295.88	9311.2	5215.45	4267.06	9357.49	2279.53	2004.91	5869.65	6686.36	5193.9	8725.95	4795.19	4776.38	10028.1
ENSG00000060069	CTDP1	0.550707	0.0390581	0.189845	1492.6	1160.29	782.603	1144.37	1244.97	752	1001.99	681.062	869.62	753.634	1816.36	855.982	1396.78	866.85	876.985
ENSG00000060138	YBX3	1.88958	0.0220102	0.131582	1120.04	3503.9	314.82	18565.1	6162.01	689.411	1739.99	3626.11	2148	1912.45	1241.71	1588.38	518.329	1355.98	1660.4
ENSG00000060140	STYK1	3.47033	0.00018849	0.00386058	201.607	153.536	16.8971	2379.12	540.992	51.3789	964.415	351.326	127.374	50.4223	71.3282	44.5719	103.141	173.196	152.303
ENSG00000060237	WNK1	0.3086	0.382522	0.681569	2920.36	2844.8	3853.43	9612.17	4218.95	2797.81	5066.79	3123.66	2556.75	2922.69	3015.88	3555.62	3046.16	4000.91	3470.12
ENSG00000060339	CCAR1	0.00365691	0.984467	0.993802	1305.14	917.924	1312.64	1681.33	1545.41	1352.67	1239	1416.1	1727.66	1356.9	1146.27	1526.59	1027.04	1308.11	1292.09
ENSG00000060491	OGFR	0.02651	0.896075	0.963735	1604.61	1163.58	1506.51	1790.32	1781.05	1826.29	1315.11	1834.16	1602.6	1655.83	1364.28	2124.25	1459.71	1969.56	2314.41
ENSG00000060558	GNA15	-1.03113	0.195583	0.488469	9.43192	58.1242	19.5651	30.5697	14.7276	27.0907	3.85381	89.3035	27.7908	117.052	6.02774	10.13	20.9779	21.7583	27.8724
ENSG00000060642	PIGV	0.360216	0.142005	0.410869	453.911	585.629	377.962	392.089	712.814	404.492	867.106	418.058	490.971	442.096	451.076	465.978	596.996	437.777	413.109
ENSG00000060656	PTPRU	1.29029	0.122058	0.379325	537.62	85.5413	336.164	46.5191	2444.77	217.66	476.908	965.655	875.41	213.395	378.743	169.17	383.72	1056.58	84.6127
ENSG00000060688	SNRNP40	-0.406665	0.0293495	0.159041	835.904	652.526	976.475	637.976	895.435	1145.28	965.378	682.043	766.562	850.877	631.908	594.629	624.966	733.689	947.662
ENSG00000060709	RIMBP2	0.91597	0.0734623	0.281047	1940.62	1266.67	1087.64	6793.12	2107.02	1296.62	1193.72	550.541	1990.51	936.415	1675.71	2025.99	2196.56	2180.18	1143.76
ENSG00000060718	COL11A1	-4.93701	2.07868e-06	0.000105413	47.1596	35.0939	8895.88	583.482	18.6549	10668.1	404.65	1611.39	287.171	10735.5	37.171	79.0137	48.0743	39.1649	3796.62
ENSG00000060749	QSER1	0.183507	0.555518	0.804921	348.981	298.298	349.503	203.355	319.097	302.668	706.21	540.728	298.751	313.339	289.331	294.782	347.883	311.579	425.054
ENSG00000060762	MPC1	1.15699	0.0549292	0.237309	1384.13	3862.52	380.63	1414.18	402.553	567.036	329.5	692.838	858.04	533.936	1451.68	1115.31	440.536	845.092	420.077
ENSG00000060971	ACAA1	-0.286069	0.267073	0.574429	748.659	1394.98	1431.81	867.913	1440.36	1151.82	956.707	923.457	1086.16	1030.96	769.541	656.422	771.811	892.09	1349.82
ENSG00000060982	BCAT1	0.515447	0.529208	0.788949	30.6538	48.2541	15.1185	14.6203	12.7639	17.7491	662.855	256.134	41.6862	84.6375	41.1895	18.2339	24.4742	107.921	37.8268
ENSG00000061273	HDAC7	0.0557751	0.896204	0.963735	896.033	1218.41	1272.62	1588.29	712.814	1441.41	447.041	2421.01	1324.69	1193.03	799.68	2473.74	1825.95	940.828	1595.7
ENSG00000061337	LZTS1	0.49019	0.466239	0.745708	29.4748	23.0303	28.4583	17.2785	39.2735	18.6832	23.1228	65.7509	88.0041	93.6415	47.2173	59.7668	171.319	105.31	120.449
ENSG00000061455	PRDM6	-0.588716	0.570969	0.813594	1.17899	0	7.11457	23.9241	8.83653	0.934161	12.5249	164.868	33.5805	36.016	9.0416	7.09098	3.49631	4.35166	4.97722
ENSG00000061656	SPAG4	-0.0763964	0.915249	0.969539	60.1285	67.9944	187.647	118.291	33.3825	132.651	516.41	267.911	157.481	95.4423	57.2635	31.4029	55.0669	141.864	69.681
ENSG00000061676	NCKAP1	-0.000819707	0.997108	0.998287	2940.4	3226.44	3192.66	2319.31	3558.18	2831.44	2055.04	2476.95	2475.7	3082.07	4085.8	2309.63	3350.34	3483.07	4121.13
ENSG00000061794	MRPS35	0.058574	0.852923	0.947382	697.962	1353.31	611.853	1072.6	592.048	806.181	727.406	509.324	500.234	600.566	675.106	702.007	618.848	416.889	545.503
ENSG00000061918	GUCY1B1	1.56209	0.0232309	0.135906	473.954	1408.14	80.0389	66.4558	111.929	59.7863	510.629	547.597	279.066	279.124	258.188	199.56	578.64	251.526	262.797
ENSG00000061936	SFSWAP	0.397349	0.171383	0.453594	1227.33	1510.13	1414.91	3229.75	1562.1	1241.5	1741.92	1382.73	1440.49	1123.7	1355.24	2480.83	1416.01	1355.98	1215.44
ENSG00000061938	TNK2	0.21554	0.597943	0.82904	4376.41	3668.41	5166.07	2634.31	3124.21	3490.96	1956.77	2628.07	7368.03	3822.19	6743.03	9236.5	6360.67	4869.5	4994.14
ENSG00000061987	MON2	0.316978	0.205271	0.50041	853.589	1659.28	1182.8	2070.76	1071.18	1185.45	2008.8	1308.15	1211.21	974.231	1179.43	1506.33	1071.62	1373.38	1342.85
ENSG00000062038	CDH3	-0.926619	0.102232	0.341844	44.8016	101.992	71.1457	42.5317	43.2008	161.61	44.3188	78.5086	26.6328	61.2271	27.1248	34.4419	24.4742	18.277	132.394
ENSG00000062194	GPBP1	0.144371	0.549468	0.800278	2172.88	2585.98	2001.86	3854.44	2016.69	2070.1	2236.17	1821.4	1530.81	2027.7	1929.88	2922.5	1824.2	2127.96	1947.09
ENSG00000062282	DGAT2	1.88825	0.00514934	0.0482045	242.872	134.892	60.4739	61.1394	471.282	58.8522	268.803	216.88	127.374	32.4144	195.901	38.4939	186.179	286.339	15.9271
ENSG00000062370	ZNF112	-0.0380643	0.884367	0.959713	141.479	222.627	225.888	170.127	158.076	198.976	276.511	150.148	135.48	154.869	158.73	245.145	229.883	140.123	228.952
ENSG00000062485	CS	-0.364079	0.019972	0.122394	2021.97	2413.8	3166.87	2763.23	1862.55	2544.66	2411.52	1684.01	1859.67	2606.65	2376.94	2106.02	2356.52	2023.52	1974.96
ENSG00000062524	LTK	1.67327	0.0500878	0.224472	34.1907	14.2569	7.11457	3.98735	10.8002	1.86832	30.8304	64.7696	13.8954	14.4064	6.02774	20.2599	33.215	61.7935	3.98177
ENSG00000062582	MRPS24	0.0332631	0.893134	0.962727	552.947	585.629	318.377	578.166	351.498	436.253	355.514	362.121	269.802	467.307	343.581	456.861	427.424	360.317	360.35
ENSG00000062598	ELMO2	0.289154	0.373461	0.67464	1457.23	2955.56	1098.31	1248.04	788.415	1017.3	1594.51	1072.62	998.152	1191.23	846.897	1358.43	1294.51	1212.37	1336.88
ENSG00000062650	WAPL	-0.14607	0.290149	0.59954	703.857	678.847	963.135	796.141	967.11	886.519	739.931	789.011	772.352	825.666	807.717	721.254	808.523	1017.42	865.04
ENSG00000062716	VMP1	0.223417	0.548178	0.799443	782.85	1216.22	916.001	948.989	956.309	893.058	2764.14	2009.82	940.255	1256.96	953.387	811.41	937.012	872.072	1124.85
ENSG00000062725	APPBP2	0.460532	0.199037	0.491832	1064.63	1092.3	1060.96	921.078	1359.84	1105.11	3651.48	1526.99	1141.74	967.028	1299.98	914.736	1473.7	1241.96	1554.88
ENSG00000062822	POLD1	-0.294384	0.231285	0.533513	527.009	359.712	821.733	575.508	439.863	426.912	383.454	523.063	453.916	417.785	403.858	464.965	600.492	327.245	378.268
ENSG00000063015	SEZ6	2.09153	0.00568597	0.0516681	733.332	133.795	152.963	47.8482	335.788	52.313	1038.6	376.841	245.485	111.649	674.102	80.0267	739.47	907.756	89.5899
ENSG00000063046	EIF4B	0.252514	0.362048	0.664531	9890.55	25574.7	9040.84	15625.1	13587.6	11976.9	9818.53	9536.83	9974.58	13397	15290.4	14328.8	13798.2	13417.9	13147.8
ENSG00000063127	SLC6A16	0.754264	0.609143	0.835364	1.17899	2.19337	0	10.6329	8.83653	1.86832	119.468	122.67	12.7374	4.50199	0	1.013	0	0	0.995443
ENSG00000063169	BICRA	-0.343439	0.308977	0.619392	425.616	348.745	886.654	1028.74	394.699	532.472	685.977	577.038	602.134	511.427	316.456	501.433	368.861	391.649	447.949
ENSG00000063176	SPHK2	-0.148639	0.533042	0.791251	898.391	848.833	1390.01	1501.9	1358.86	1478.78	1609.93	805.694	1325.85	927.411	1203.54	920.814	1041.03	1100.1	1084.04
ENSG00000063177	RPL18	0.337214	0.342159	0.6505	13419.3	23987.8	7474.75	26383	11857.6	11478	11731.9	13112.9	10728.4	12367.9	8695.01	9667.03	8513.52	9921.78	10256.1
ENSG00000063180	CA11	0.106131	0.86565	0.952795	2631.51	4138.88	2086.35	7609.19	962.2	1929.98	1131.09	621.199	943.729	2375.25	1127.19	2510.21	1047.15	1241.96	3555.72
ENSG00000063241	ISOC2	0.36913	0.370999	0.672556	1582.21	1352.21	1586.55	2692.79	1546.39	697.818	1186.01	721.298	969.204	610.47	1460.72	1049.46	944.879	914.718	538.535
ENSG00000063244	U2AF2	-0.39139	0.0675617	0.267232	5168.69	5561.28	8117.73	8442.55	4394.7	6641.89	7061.13	4702.66	4878.44	6586.42	4810.13	5730.52	4461.3	4047.91	5841.26
ENSG00000063245	EPN1	-0.09239	0.69627	0.878794	3631.29	3964.51	4081.1	6353.18	4707.91	3805.77	2990.55	2709.53	3248.05	3743.86	3240.91	3423.93	3448.24	3010.48	2912.67
ENSG00000063322	MED29	0.100462	0.702473	0.880979	2607.93	2794.35	2136.15	4585.45	2753.07	2831.44	3439.52	1827.29	1619.97	2462.59	2329.72	2333.94	2585.52	2186.27	2803.17
ENSG00000063438	AHRR	5.29398	3.40658e-07	2.29926e-05	463.343	28.5138	15.1185	85.0635	797.252	32.6956	1644.61	630.031	2042.62	20.7092	76.3513	3609.31	540.18	813.76	19.9089
ENSG00000063587	ZNF275	1.2387	2.44805e-05	0.000784287	1295.71	663.493	371.736	535.634	556.702	411.031	1010.66	648.677	886.989	337.65	998.595	654.396	1378.42	977.382	967.571
ENSG00000063601	MTMR1	0.247706	0.428582	0.719144	367.845	342.165	433.989	851.964	318.115	414.768	767.871	500.492	482.865	360.16	275.267	498.394	444.032	406.445	487.767
ENSG00000063660	GPC1	0.944671	0.128774	0.389751	3236.33	395.903	1915.6	5020.07	4436.92	1409.65	851.691	2082.44	3713.54	2001.59	7351.83	1912.54	2949.14	7510.96	1549.91
ENSG00000063761	ADCK1	0.575882	0.112586	0.361305	233.44	311.458	240.117	641.963	441.827	261.565	447.041	276.743	347.385	191.785	229.054	539.927	180.06	235.86	251.847
ENSG00000063854	HAGH	0.00869952	0.984134	0.993802	4690.02	3920.64	2675.08	6483.43	5674.04	4114.05	994.282	1253.19	3176.25	3922.14	4032.55	3541.44	3082.87	3638.86	2618.02
ENSG00000063978	RNF4	0.244808	0.155307	0.429821	1038.69	905.86	889.322	979.559	1426.61	880.914	1346.9	942.103	782.774	870.686	920.234	1102.14	1020.05	1072.25	977.525
ENSG00000064012	CASP8	0.197788	0.762592	0.910433	62.4865	18.6436	53.3593	57.152	231.714	69.1279	76.1127	257.116	56.7395	97.2431	72.3328	44.5719	34.0891	54.8309	41.8086
ENSG00000064042	LIMCH1	-0.149772	0.682096	0.871988	1202.57	428.803	2394.05	1945.83	1669.12	1476.91	1449.03	2322.87	1369.85	1406.42	1758.09	2413.97	1250.81	1559.63	1657.41
ENSG00000064102	INTS13	0.0948533	0.716527	0.886879	367.845	514.344	378.851	711.077	403.535	371.796	435.48	311.09	355.49	422.287	519.39	461.926	276.209	333.337	324.514
ENSG00000064115	TM7SF3	0.992521	0.00756403	0.0628432	1162.48	2259.17	637.644	1395.57	1989.2	752	1548.27	1031.41	1065.31	747.331	2658.23	978.555	1135.43	1240.22	543.512
ENSG00000064195	DLX3	-3.13363	NA	NA	1.17899	2.19337	0.889322	0	0.981837	2.80248	0	133.465	4.6318	27.9124	0	0	0	3.48133	0.995443
ENSG00000064199	SPA17	0.398157	0.257018	0.564163	300.643	286.234	220.552	475.824	254.296	265.302	656.11	276.743	229.274	242.207	260.197	375.822	139.853	281.117	302.615
ENSG00000064201	TSPAN32	-0.167259	0.871716	0.954968	1.17899	5.48342	24.901	15.9494	4.90919	11.2099	0.963451	81.4526	5.78975	18.008	10.0462	10.13	2.62224	205.398	42.8041
ENSG00000064205	WISP2	-2.36566	NA	NA	7.07394	25.2237	35.5729	139.557	37.3098	20.5515	4.81726	1641.81	50.9498	406.08	12.0555	5.06498	6.99263	38.2946	6.9681
ENSG00000064225	ST3GAL6	1.72694	0.0359681	0.180778	123.794	108.572	29.3476	352.216	706.923	38.3006	76.1127	216.88	53.2657	75.6335	63.2912	27.3509	83.9115	57.4419	27.8724
ENSG00000064270	ATP2C2	2.19504	0.0234272	0.136719	9.43192	8.77347	18.6758	101.013	68.7286	7.47329	4.81726	115.8	4.6318	3.6016	84.3883	11.143	13.9853	26.1099	96.558
ENSG00000064300	NGFR	2.18846	NA	NA	371.382	59.2209	27.569	167.469	137.457	58.8522	14468.1	6155.07	519.919	479.913	62.2866	323.146	179.186	2031.35	63.7084
ENSG00000064309	CDON	-0.257197	0.707055	0.882126	214.576	74.5745	164.524	43.8608	73.6378	259.697	95.3817	690.875	110.005	327.745	224.031	173.222	144.223	119.235	552.471
ENSG00000064313	TAF2	0.309282	0.232556	0.535373	582.421	889.41	618.079	624.685	539.029	567.97	1053.05	597.647	444.653	469.108	688.166	1004.89	627.588	591.825	559.439
ENSG00000064393	HIPK2	0.378912	0.304691	0.614677	1313.4	1001.27	1283.29	1968.42	2416.3	1479.71	2526.17	1303.24	883.515	1237.15	1788.23	767.851	2528.71	2608.38	1699.22
ENSG00000064419	TNPO3	0.0144351	0.935845	0.977058	818.219	988.112	929.341	1186.9	850.271	986.474	1265.98	871.445	780.458	933.714	1070.93	695.929	976.346	1087.04	920.785
ENSG00000064489	BORCS8-MEF2B	-0.501974	0.479055	0.754984	2.35798	21.9337	12.4505	46.5191	3.92735	24.2882	15.4152	31.4034	16.2113	33.3148	12.0555	8.10397	5.24447	15.666	19.9089
ENSG00000064490	RFXANK	-0.630803	0.000463604	0.00778805	525.83	701.877	922.226	760.255	564.556	942.569	377.673	589.796	670.453	938.216	579.667	570.317	631.959	551.79	719.705
ENSG00000064545	TMEM161A	0.391054	0.10509	0.346769	608.359	633.883	561.162	757.596	454.591	375.533	741.858	620.218	826.776	395.275	478.2	462.939	530.566	460.405	415.1
ENSG00000064547	LPAR2	-0.286497	0.608352	0.83529	61.3075	27.4171	148.517	11.962	69.7104	73.7987	77.0761	157.999	98.4257	49.5219	76.3513	40.5199	127.615	78.3298	63.7084
ENSG00000064601	CTSA	0.21568	0.479361	0.754985	1575.13	2844.8	1628.35	727.027	2279.83	1558.18	2114.78	1813.55	2056.52	2078.12	2344.79	1473.91	2589.02	2418.65	2213.87
ENSG00000064607	SUGP2	-0.108675	0.628747	0.846212	3843.51	3020.27	5425.75	5075.9	2732.45	3452.66	4079.25	2706.58	4057.45	2809.24	3965.25	3755.18	3659.77	3187.15	3278.99
ENSG00000064651	SLC12A2	1.36799	3.78539e-07	2.50152e-05	1624.65	755.615	477.566	793.483	1520.87	420.373	1596.44	1368.01	866.146	497.02	971.47	1540.77	1351.33	1085.3	926.758
ENSG00000064652	SNX24	-0.165668	0.71203	0.884989	306.538	240.174	460.669	309.684	988.71	336.298	397.905	278.705	182.956	330.446	343.581	219.82	221.142	366.41	164.248
ENSG00000064655	EYA2	-1.02729	NA	NA	74.2764	13.1602	1.77864	13.2912	11.782	5.60497	124.285	967.618	35.8964	176.478	5.02311	4.05199	13.9853	36.5539	5.97266
ENSG00000064666	CNN2	1.86416	0.0297366	0.160542	543.515	1768.95	76.4817	217.975	237.605	63.523	108.87	4266.94	1157.95	712.215	460.117	958.295	1183.5	536.995	969.562
ENSG00000064687	ABCA7	-0.423092	0.526352	0.787334	2445.23	5488.9	13132.6	12161.4	3606.29	4956.66	672.489	1169.78	6088.5	3983.36	4401.25	8586.16	5296.92	2839.02	13094.1
ENSG00000064692	SNCAIP	-1.12659	NA	NA	5.89495	9.87015	5.33593	2.65823	2.94551	3.73664	7.70761	273.799	23.159	57.6255	3.01387	47.6108	3.49631	6.09232	2.98633
ENSG00000064703	DDX20	0.375225	0.125889	0.385459	277.063	213.853	212.548	259.178	300.442	264.368	478.835	398.431	318.436	214.295	203.938	300.86	242.994	310.708	279.72
ENSG00000064726	BTBD1	0.365523	0.347208	0.65382	1847.48	1602.25	1558.09	653.925	2585.18	1276.06	1965.44	1406.28	1537.76	1462.25	2887.29	1166.97	3459.6	1954.76	1072.09
ENSG00000064763	FAR2	0.84707	0.26269	0.570447	63.6655	84.4446	55.1379	33.2279	40.2553	43.9056	227.375	138.371	39.3703	60.3267	16.074	42.5459	38.4595	52.2199	370.305
ENSG00000064787	BCAS1	2.98766	0.000425599	0.00728511	106.109	8.77347	9.78254	11.962	278.842	6.53913	111.76	74.5831	132.006	18.9084	115.532	39.5069	20.9779	195.825	21.8998
ENSG00000064835	POU1F1	0.312805	0.77367	0.91494	8.25293	0	14.2291	1.32912	3.92735	4.67081	51.0629	1.96271	1.15795	10.8048	5.02311	25.3249	17.4816	15.666	15.9271
ENSG00000064886	CHI3L2	-1.43079	NA	NA	11.7899	1.09668	1.77864	0	0.981837	3.73664	6.74416	92.2476	9.26359	27.9124	2.00925	5.06498	4.37039	3.48133	0.995443
ENSG00000064932	SBNO2	0.446329	0.129319	0.390677	868.916	1335.76	1284.18	2585.13	1253.81	822.062	1658.1	2047.11	1790.19	1157.91	1202.53	1348.3	992.953	1454.32	1256.25
ENSG00000064933	PMS1	-0.160317	0.518386	0.781039	370.203	375.066	499.799	365.507	487.973	397.019	187.873	310.109	450.442	419.586	397.831	445.719	428.298	351.614	541.521
ENSG00000064961	HMG20B	-0.594954	0.153264	0.427089	328.938	492.411	816.397	431.963	876.781	710.897	374.783	1518.16	794.353	1180.42	488.247	372.783	442.284	537.865	511.658
ENSG00000064989	CALCRL	-0.0789642	0.924045	0.972706	33.0117	57.0275	181.422	78.4179	54.9829	61.6546	30.8304	736.018	233.906	228.701	122.564	22.2859	154.712	119.235	143.344
ENSG00000064995	TAF11	-0.403916	0.168291	0.448854	353.697	671.17	507.803	571.52	427.099	666.057	239.899	342.494	358.964	480.813	253.165	569.304	434.417	404.704	377.273
ENSG00000064999	ANKS1A	-0.225771	0.321917	0.632824	564.736	616.336	924.894	494.431	945.509	795.905	486.543	596.665	618.345	640.184	622.866	632.11	883.693	882.516	728.664
ENSG00000065000	AP3D1	0.0364885	0.878127	0.957182	6449.08	7896.12	9818.11	11855.7	8829.66	6511.1	8569.9	4614.34	6893.27	6026.37	8274.07	7029.18	6816.06	7731.15	6757.07
ENSG00000065029	ZNF76	-0.627376	0.0643622	0.260511	1774.38	1890.68	4644.04	2279.44	1749.63	2434.42	1134.95	984.301	2500.01	2163.66	1560.18	3392.53	2534.83	1866.86	2264.63
ENSG00000065054	SLC9A3R2	-0.660751	0.133977	0.398233	1940.62	727.101	2785.36	1608.23	1373.59	2095.32	656.11	3946.04	3252.68	3587.19	1499.9	1795.03	1446.6	1797.23	1382.67
ENSG00000065057	NTHL1	-1.04496	0.00358625	0.0369656	603.643	251.14	637.644	412.026	206.186	569.838	126.212	340.531	273.276	564.55	179.827	282.626	248.238	281.117	232.934
ENSG00000065060	UHRF1BP1	0.461399	0.16014	0.437931	392.604	655.817	329.049	190.064	341.679	333.496	577.107	319.922	298.751	253.012	289.331	398.108	631.085	477.812	467.858
ENSG00000065135	GNAI3	-0.57168	0.0685679	0.269606	660.235	1306.15	1531.41	869.242	719.687	1230.29	1613.78	1372.92	639.188	1334.39	544.505	829.644	720.241	790.261	957.616
ENSG00000065150	IPO5	-0.485058	0.0792254	0.294019	2044.37	3977.67	4183.37	4051.15	2303.39	3537.67	3102.31	2125.62	1961.57	3601.6	2259.4	2639.87	2313.69	1749.37	3832.46
ENSG00000065154	OAT	0.251937	0.458965	0.741328	2909.75	1812.82	1504.73	1354.37	3092.79	1729.13	801.592	1335.63	1713.76	1628.82	2793.86	1422.25	2356.52	1948.67	1619.59
ENSG00000065183	WDR3	0.344402	0.12646	0.386222	1098.82	739.164	646.537	697.786	761.906	716.502	891.192	660.453	575.501	632.98	1166.37	668.578	933.516	1114.02	827.213
ENSG00000065243	PKN2	-0.140024	0.564104	0.809411	609.538	809.352	1141.89	883.863	896.417	1162.1	1524.18	1094.21	915.938	930.112	911.193	895.489	832.123	939.088	1426.47
ENSG00000065268	WDR18	-0.489081	0.0606517	0.251491	1130.65	1061.59	1435.37	1112.47	1026.02	1204.13	591.559	622.18	1320.06	1102.99	571.63	834.709	814.641	754.577	829.204
ENSG00000065308	TRAM2	-0.976001	0.0945217	0.325235	205.144	303.781	667.881	102.342	129.603	531.538	148.372	1256.14	441.179	928.311	251.156	361.64	456.269	266.321	404.15
ENSG00000065320	NTN1	4.19318	2.92021e-05	0.000893303	1721.33	349.842	23.1224	42.5317	2448.7	21.4857	1341.12	768.403	1593.34	87.3387	55.2542	96.2347	580.388	636.212	21.8998
ENSG00000065328	MCM10	1.41175	0.139983	0.407259	21.2218	4.38673	9.78254	5.31647	30.437	0	19.269	9.81357	8.10565	8.10359	11.0508	12.156	60.3114	6.09232	1.99089
ENSG00000065357	DGKA	-0.583457	0.277713	0.587564	251.125	150.246	292.587	102.342	39.2735	251.289	72.2589	343.475	104.215	263.817	144.666	369.744	98.7709	194.084	285.692
ENSG00000065361	ERBB3	3.19741	0.001241	0.0163564	279.421	19.7403	15.1185	13.2912	29.4551	27.0907	52.0264	199.216	386.755	23.4104	147.68	28.3639	840.863	382.076	27.8724
ENSG00000065371	ROPN1	2.13351	0.0387268	0.188815	70.7394	28.5138	16.0078	31.8988	93.2745	7.47329	42.3919	24.5339	30.1067	1.8008	91.4206	24.3119	2.62224	4.35166	0
ENSG00000065413	ANKRD44	1.23051	0.00426487	0.0419976	62.4865	44.964	40.9088	102.342	129.603	45.7739	39.5015	104.024	125.059	28.8128	95.4391	118.521	67.304	150.567	43.7995
ENSG00000065427	KARS	-0.167386	0.51001	0.776224	2123.36	2611.2	2077.46	3572.67	2238.59	2227.97	1398.93	1585.87	1714.92	2503.11	1781.2	1643.08	1601.31	1876.43	2107.35
ENSG00000065457	ADAT1	0.634767	0.0405299	0.195049	319.506	548.342	234.781	636.647	432.008	237.277	503.885	362.121	313.804	315.14	407.877	171.196	347.883	506.533	340.442
ENSG00000065485	PDIA5	1.23089	0.0166604	0.109185	228.724	336.682	168.971	410.697	431.026	41.1031	133.92	386.655	319.594	181.881	190.878	170.183	199.29	147.956	725.678
ENSG00000065491	TBC1D22B	-0.344027	0.196379	0.488888	383.172	480.347	561.162	229.937	350.516	415.702	295.78	282.631	297.593	372.765	248.142	409.251	554.166	408.185	311.574
ENSG00000065518	NDUFB4	-0.659536	0.00519179	0.048387	2659.8	2413.8	2156.6	2066.78	2126.66	3946.83	1626.31	1338.57	1808.72	3615.1	2221.22	1952.04	1838.19	1749.37	2810.14
ENSG00000065526	SPEN	0.259367	0.363665	0.666404	1328.72	1672.44	1434.48	845.318	895.435	1328.38	2606.14	1988.23	1707.98	1405.52	1620.46	1742.35	2078.56	1792.88	1676.33
ENSG00000065534	MYLK	-1.41296	0.132233	0.395761	55.4126	88.8313	2061.45	82.4052	280.805	679.135	107.907	3065.76	548.868	1231.75	162.749	99.2737	409.943	564.845	499.712
ENSG00000065548	ZC3H15	-0.0900581	0.739243	0.899474	1450.16	1908.23	1281.51	2045.51	1745.71	1424.6	782.322	936.215	1027.1	1651.33	1542.1	1139.62	1242.94	1265.46	1292.09
ENSG00000065559	MAP2K4	-0.241211	0.280407	0.59078	975.025	557.115	1213.92	659.242	1037.8	1012.63	1112.79	722.279	690.138	751.833	758.49	837.748	844.36	845.092	1037.25
ENSG00000065600	TMEM206	0.983517	0.000385299	0.00674754	387.888	350.939	155.631	378.798	315.17	143.861	394.052	160.943	303.383	158.47	284.308	341.38	285.824	259.359	162.257
ENSG00000065609	SNAP91	-0.308963	0.427045	0.718281	2309.64	2090.28	2333.58	1650.76	970.055	2213.96	981.757	589.796	1584.07	1801.7	2525.62	2230.62	1027.92	2577.92	1963.01
ENSG00000065613	SLK	-1.16701	0.000100813	0.00233459	768.702	715.037	1222.82	866.584	701.032	2382.11	624.316	1660.46	933.307	2236.59	889.091	543.979	968.479	954.754	779.432
ENSG00000065615	CYB5R4	0.0652932	0.842841	0.943452	216.934	524.215	261.461	324.304	206.186	214.857	305.414	205.104	198.009	258.414	166.767	264.392	139.853	264.581	260.806
ENSG00000065618	COL17A1	-3.27878	0.00237377	0.0269586	1.17899	0	44.4661	0	6.87286	20.5515	0	16.6831	2.3159	42.3187	6.02774	1.013	2.62224	58.3122	0.995443
ENSG00000065621	GSTO2	-1.51021	5.22277e-05	0.00140504	824.114	688.717	2200.18	785.508	598.921	2053.29	384.417	248.283	1016.68	1468.55	553.547	769.877	616.225	397.742	1152.72
ENSG00000065665	SEC61A2	0.118493	0.652682	0.858263	448.016	359.712	443.771	373.482	219.932	348.442	508.702	235.526	448.126	292.63	388.789	538.914	411.691	344.651	434.013
ENSG00000065675	PRKCQ	-0.504179	0.608516	0.83529	153.269	5.48342	178.754	5.31647	80.5106	30.8273	26.9766	51.0306	35.8964	32.4144	202.934	5.06498	24.4742	83.5518	7.96355
ENSG00000065717	TLE2	-0.612404	0.311474	0.621833	425.616	1142.74	2973	1109.81	1215.51	891.19	57.8071	1115.8	1767.03	1093.98	851.92	1225.73	1425.62	849.444	1785.83
ENSG00000065802	ASB1	-0.1915	0.525975	0.787218	1545.66	1832.56	1749.3	971.584	1637.7	2011.25	1049.2	1006.87	928.675	1501.87	1974.08	1234.84	2365.26	1807.68	2076.49
ENSG00000065809	FAM107B	-2.05915	0.00214274	0.024932	606.001	186.436	2870.73	345.57	184.585	2303.64	69.3685	881.259	255.907	2076.32	843.883	325.172	694.018	648.397	1918.22
ENSG00000065833	ME1	-0.399131	0.245241	0.550638	909.002	801.675	964.025	534.305	443.79	498.842	585.778	335.624	382.123	711.315	828.814	461.926	298.061	442.128	573.375
ENSG00000065882	TBC1D1	-0.517294	0.175612	0.45959	920.792	334.488	1294.85	451.9	945.509	1575.93	718.735	1412.17	1208.9	1290.27	1401.45	823.566	1316.36	1386.44	706.765
ENSG00000065883	CDK13	0.0233526	0.901217	0.964938	943.192	1121.91	1131.22	1577.66	1122.24	1159.29	1350.76	1052.01	936.781	992.239	884.068	1293.6	844.36	1126.21	1094.99
ENSG00000065911	MTHFD2	-0.458902	0.40272	0.696851	567.094	1730.57	911.555	1069.94	560.629	1289.14	486.543	464.182	332.331	358.359	383.766	529.797	169.571	322.893	831.195
ENSG00000065923	SLC9A7	0.307869	0.33587	0.645271	1681.24	667.88	1628.35	1085.89	2270.01	1083.63	1798.76	912.662	1609.55	826.566	1873.62	1613.7	1271.78	1355.98	1379.68
ENSG00000065970	FOXJ2	0.11834	0.72611	0.892726	701.499	1381.82	463.337	813.419	448.7	773.485	642.622	845.93	528.025	783.347	371.71	991.724	770.063	558.753	717.715
ENSG00000065978	YBX1	0.0248567	0.961064	0.986128	2223.58	2034.35	2471.42	1148.36	2654.89	1764.63	5539.85	8048.11	3234.15	4254.38	1657.63	2136.41	1728.05	2604.9	1540.95
ENSG00000065989	PDE4A	0.639439	0.234581	0.537587	285.316	286.234	131.62	31.8988	300.442	173.754	229.301	532.877	130.848	158.47	163.753	170.183	415.187	226.286	116.467
ENSG00000066027	PPP2R5A	1.01407	0.00750981	0.0625289	1074.06	859.8	219.662	422.659	803.143	331.627	762.09	1188.42	587.08	533.936	723.328	399.121	778.804	852.055	315.556
ENSG00000066032	CTNNA2	-0.823907	0.0368595	0.183235	607.18	182.049	1083.19	326.963	458.518	489.5	416.211	185.477	267.486	405.179	452.08	220.833	391.587	463.016	497.722
ENSG00000066044	ELAVL1	0.063423	0.75559	0.906841	1617.58	1672.44	1612.34	2897.47	1928.33	1845.9	1939.43	1440.63	1327.01	1648.63	1684.75	1677.52	1960.56	1654.5	1547.91
ENSG00000066056	TIE1	0.587168	0.466121	0.745708	319.506	114.055	132.509	174.114	287.678	66.3254	70.3319	2077.53	573.185	643.785	275.267	188.417	372.357	335.078	275.738
ENSG00000066084	DIP2B	-0.487386	0.0119415	0.0868081	1292.17	1186.61	1599	933.04	1106.53	1794.52	1392.19	841.023	883.515	1357.8	1398.43	1136.58	1402.02	907.756	1075.08
ENSG00000066117	SMARCD1	-0.449936	0.0972289	0.331186	858.305	788.515	1694.16	1593.61	683.359	1134.07	1309.33	862.613	763.089	1035.46	715.291	1161.91	846.982	771.984	961.598
ENSG00000066135	KDM4A	-0.487769	0.0193171	0.119924	975.025	760.001	1989.41	1125.76	1392.25	1508.67	1550.19	1098.14	1089.63	1319.98	945.35	1213.57	1268.29	986.086	1337.88
ENSG00000066136	NFYC	-0.184579	0.310617	0.621065	1247.37	671.17	1197.03	723.039	1057.44	1057.47	1057.87	949.954	936.781	971.53	964.438	973.49	1106.58	827.685	837.168
ENSG00000066185	ZMYND12	0.248982	0.473618	0.750582	206.323	178.759	77.371	67.7849	144.33	133.585	134.883	79.4899	98.4257	116.151	169.781	122.573	168.697	82.6815	100.54
ENSG00000066230	SLC9A3	0.863288	0.0290987	0.158061	141.479	225.917	190.315	372.153	179.676	111.165	99.2355	150.148	236.222	72.0319	267.23	313.016	275.335	314.19	144.339
ENSG00000066248	NGEF	1.77845	0.124101	0.382546	63.6655	29.6104	2.66796	18.6076	52.0374	1.86832	3.85381	232.582	12.7374	36.9164	6.02774	5.06498	123.245	18.277	2.98633
ENSG00000066279	ASPM	1.07077	0.206926	0.502666	34.1907	23.0303	41.7981	9.30382	10.8002	2.80248	162.823	54.956	24.3169	13.506	79.3652	23.2989	37.5854	16.5363	11.9453
ENSG00000066294	CD84	-1.68158	NA	NA	10.6109	28.5138	48.9127	50.5064	15.7094	52.313	23.1228	87.3408	34.7385	209.793	19.0878	21.2729	20.9779	23.499	52.7585
ENSG00000066322	ELOVL1	0.21445	0.536898	0.79369	430.332	506.668	693.671	1271.96	1224.35	577.312	1075.21	961.73	743.403	738.327	624.875	412.29	545.425	706.709	823.232
ENSG00000066336	SPI1	-1.1579	0.0426027	0.202456	121.436	354.229	170.75	140.886	72.6559	233.54	50.0995	368.009	135.48	592.462	73.3374	87.1177	121.497	92.2551	170.221
ENSG00000066379	ZNRD1	0.286548	0.385104	0.683629	148.553	177.663	117.39	127.595	216.004	158.807	68.405	244.358	166.745	155.769	137.633	247.171	233.379	208.009	130.403
ENSG00000066382	MPPED2	3.67757	1.95371e-15	1.01005e-12	435.048	345.455	12.4505	443.925	229.75	16.8149	140.664	119.726	133.164	27.9124	188.869	225.898	160.83	181.899	323.519
ENSG00000066405	CLDN18	5.35975	4.83292e-08	4.3857e-06	54.2336	29.6104	7.11457	86.3926	200.295	6.53913	259.168	85.3781	489.813	0.900399	189.874	872.19	20.9779	46.9979	54.7494
ENSG00000066422	ZBTB11	0.0396503	0.883964	0.959635	357.234	458.414	404.641	228.608	485.028	467.081	752.455	498.529	375.176	370.964	371.71	327.198	435.291	426.462	390.214
ENSG00000066427	ATXN3	0.280451	0.0921208	0.320246	561.199	683.234	576.28	825.381	600.884	542.748	678.27	664.379	682.032	452	567.612	767.851	527.943	511.755	566.407
ENSG00000066455	GOLGA5	0.477381	0.186608	0.475416	696.783	1303.96	773.71	2024.24	1318.61	666.057	1745.77	1025.52	632.24	822.964	839.864	871.177	684.403	812.019	648.034
ENSG00000066468	FGFR2	1.38559	0.21736	0.515947	68.3815	13.1602	4.44661	5.31647	26.5096	52.313	24.0863	788.03	77.5826	92.7411	70.3236	21.2729	237.749	211.491	17.918
ENSG00000066557	LRRC40	-0.297077	0.129773	0.391278	288.853	254.43	294.365	140.886	192.44	305.471	292.889	263.985	208.431	280.024	259.193	248.184	244.742	213.231	254.833
ENSG00000066583	ISOC1	-0.0619728	0.839198	0.941788	1078.78	572.469	657.209	1315.83	817.87	975.264	852.654	431.797	568.553	861.682	801.689	1043.39	602.24	589.214	884.949
ENSG00000066629	EML1	0.460639	0.139432	0.406183	694.425	492.411	724.797	1190.89	886.599	573.575	1533.81	869.482	539.604	568.152	702.231	667.565	661.677	1108.8	926.758
ENSG00000066651	TRMT11	0.418043	0.187973	0.477078	396.141	512.151	290.808	301.709	360.334	297.063	245.68	245.339	524.551	337.65	582.681	530.81	219.394	508.274	519.621
ENSG00000066654	THUMPD1	-0.109008	0.773777	0.91494	830.009	1158.1	1062.74	2841.65	1239.08	1541.37	638.768	808.638	730.666	978.733	1069.92	1195.34	822.508	925.162	1031.28
ENSG00000066697	MSANTD3	-0.423778	0.176216	0.460911	260.557	305.975	329.049	224.621	116.839	304.537	373.819	242.395	143.586	289.028	159.735	276.548	215.023	157.53	274.742
ENSG00000066735	KIF26A	2.50073	0.00170371	0.0208065	400.857	263.204	72.035	134.241	394.699	30.8273	82.8568	1030.43	735.298	207.992	751.458	187.404	2210.54	713.672	132.394
ENSG00000066739	ATG2B	0.485851	0.0465181	0.213511	1161.31	1285.31	1153.45	1983.04	1132.06	990.211	2111.89	1186.46	1014.36	793.251	1320.07	1713.99	1166.89	1235.87	1141.77
ENSG00000066777	ARFGEF1	0.554836	0.0294586	0.15945	1320.47	2314	1076.97	1084.56	1731.96	1218.15	2476.07	1223.75	1523.86	1244.35	2029.34	2119.19	2095.17	1542.23	1334.89
ENSG00000066827	ZFAT	0.0293613	0.894442	0.963443	293.569	284.041	361.954	361.52	428.081	301.734	383.454	204.122	274.434	256.614	255.174	375.822	262.224	348.133	286.688
ENSG00000066855	MTFR1	0.404372	0.122871	0.380965	209.86	420.03	188.536	175.443	292.587	177.491	222.557	285.575	247.801	236.805	286.317	375.822	251.735	235.86	187.143
ENSG00000066923	STAG3	2.39205	8.40246e-12	1.92001e-09	1237.94	1158.1	281.915	1064.62	1011.29	172.82	901.79	434.741	1144.05	177.379	1419.53	1278.4	2034.85	920.811	666.947
ENSG00000066926	FECH	-1.52928	2.61733e-07	1.83174e-05	594.211	411.256	2174.39	473.166	876.781	1919.7	1318	727.186	507.182	1853.02	714.287	539.927	681.781	589.214	806.309
ENSG00000066933	MYO9A	-0.575307	0.053523	0.233575	576.526	290.621	1353.55	851.964	839.471	780.959	500.995	971.544	581.291	829.267	713.282	594.629	610.107	785.039	641.065
ENSG00000067048	DDX3Y	2.83373	0.0541825	0.23537	8.25293	21.9337	40.0195	27.9114	2062.84	35.4981	33.7208	40.2356	3.47385	4.50199	12.0555	2256.96	11.363	9.57365	2904.7
ENSG00000067057	PFKP	0.961828	0.0674578	0.267043	5008.35	1393.88	599.403	859.938	1899.85	2576.42	4346.13	2091.27	3000.25	1031.86	3985.34	1624.85	3540.02	3912.14	1118.88
ENSG00000067064	IDI1	-0.304991	0.337225	0.646302	1110.61	1266.67	1405.13	1038.04	2167.9	1236.83	611.792	883.221	937.939	1537.88	1216.6	616.915	1008.69	1232.39	1442.4
ENSG00000067066	SP100	0.554704	0.583127	0.821	37.7277	54.8342	64.0312	51.8355	1196.86	73.7987	22.1594	1087.34	134.322	416.885	138.638	94.2087	78.6671	160.141	202.075
ENSG00000067082	KLF6	-0.277677	0.573871	0.815379	124.973	508.861	222.33	176.773	263.132	127.046	272.657	2643.78	436.547	659.992	164.758	135.742	219.394	301.135	448.945
ENSG00000067113	PLPP1	-0.133359	0.799088	0.924713	352.518	993.595	508.692	679.179	246.441	615.612	568.436	1758.59	852.251	890.494	372.715	258.314	329.528	368.15	568.398
ENSG00000067141	NEO1	0.0600049	0.8854	0.960209	1032.8	1502.46	814.619	1353.04	774.669	1025.71	720.662	2764.48	726.034	1470.35	845.892	608.811	1685.22	788.52	1002.41
ENSG00000067167	TRAM1	0.844627	0.0176657	0.113097	1945.33	5979.12	1100.09	1795.64	3255.77	1514.28	2509.79	3193.34	2516.22	2032.2	3059.08	3529.28	1835.56	1958.25	1799.76
ENSG00000067177	PHKA1	0.0104041	0.984838	0.993802	963.235	412.353	1667.48	3471.65	1096.71	807.115	1037.64	507.362	555.816	867.084	812.74	750.631	621.47	1125.34	2110.34
ENSG00000067182	TNFRSF1A	0.179601	0.838809	0.941612	45.9806	175.469	109.387	73.1014	627.394	319.483	188.836	2134.45	495.602	1091.28	307.414	993.75	195.794	332.467	1315.98
ENSG00000067191	CACNB1	0.652809	0.186174	0.474892	808.788	248.947	363.733	67.7849	432.99	283.985	647.439	548.579	363.596	271.92	674.102	366.705	728.107	620.546	274.742
ENSG00000067208	EVI5	0.1082	0.570186	0.813399	473.954	418.933	476.676	372.153	491.9	419.438	522.191	367.028	321.91	345.753	414.909	615.902	435.291	483.904	434.013
ENSG00000067221	STOML1	-0.292839	0.126344	0.385993	811.145	658.01	986.258	947.66	742.269	832.338	540.496	543.672	787.406	885.092	743.421	768.864	598.744	720.634	969.562
ENSG00000067225	PKM	-0.69684	0.00131786	0.0171902	18615.1	15476.4	21526.9	10436.2	13180.2	21778.1	8990.93	9436.73	10881.2	21348.5	16128.2	14356.2	14171.4	12411.8	15460.2
ENSG00000067248	DHX29	0.264153	0.366783	0.66953	734.511	1153.71	841.298	1831.52	949.437	830.469	1158.07	658.491	618.345	708.614	661.042	989.698	850.478	961.716	870.017
ENSG00000067334	DNTTIP2	0.252	0.215488	0.513121	1000.96	1026.5	723.908	1586.97	878.744	922.017	1104.12	965.655	730.666	826.566	976.493	869.151	815.515	873.813	952.639
ENSG00000067365	METTL22	-0.0781529	0.806483	0.92768	192.175	271.977	397.527	610.065	307.315	269.973	194.617	270.855	274.434	235.904	221.017	321.12	257.853	220.194	284.697
ENSG00000067369	TP53BP1	-0.0829964	0.779756	0.916653	2776.52	2449.99	3188.22	1928.55	2572.41	2622.19	1728.43	1240.44	2415.48	2365.35	3241.92	1956.1	3505.93	3164.53	3893.18
ENSG00000067445	TRO	0.44452	0.353997	0.658602	1427.76	537.375	837.741	519.685	625.43	943.503	1143.62	829.247	682.032	609.57	833.837	638.188	929.145	2704.12	2142.19
ENSG00000067533	RRP15	-0.20406	0.417446	0.709738	255.841	282.944	324.602	380.127	243.496	312.944	388.271	426.89	185.272	371.865	257.183	195.508	312.92	318.541	257.82
ENSG00000067560	RHOA	-0.343689	0.124629	0.383617	5787.66	10058.8	8118.62	5570.33	7137.96	7953.45	7486.98	10029.5	5743.43	9902.59	6386.39	4930.25	6278.51	5851.24	6612.73
ENSG00000067596	DHX8	0.0316336	0.938717	0.978172	642.55	686.524	1325.98	943.673	829.652	875.309	2957.8	1216.88	763.089	795.052	861.966	728.345	832.123	943.439	844.136
ENSG00000067601	PMS2P4	-0.798419	0.00900512	0.0710741	159.164	149.149	275.69	116.962	170.84	242.882	122.358	99.1171	82.2144	249.41	194.897	107.378	236.875	114.884	211.034
ENSG00000067606	PRKCZ	0.423967	0.185192	0.473937	1245.01	534.085	1067.19	978.23	1222.39	864.099	1133.98	681.062	1338.59	704.112	1498.9	1614.72	1176.51	1858.16	860.063
ENSG00000067646	ZFY	1.09034	0.359799	0.662841	1.17899	5.48342	1.77864	3.98735	324.988	0.934161	7.70761	1.96271	0	0.900399	1.00462	291.743	0	2.61099	284.697
ENSG00000067704	IARS2	0.334741	0.15348	0.427424	1794.42	1795.27	1623.9	1447.41	1720.18	1520.81	3365.34	2186.46	1728.82	1512.67	2514.57	1495.18	1627.53	1876.43	1941.11
ENSG00000067715	SYT1	0.108693	0.856954	0.949212	1460.77	1374.14	123.616	1702.6	4108.01	2566.14	2074.31	869.482	886.989	1615.32	1283.91	1011.98	792.789	1932.14	1070.1
ENSG00000067798	NAV3	0.62598	0.328372	0.638146	221.65	395.903	619.857	676.52	825.725	123.309	480.762	362.121	126.216	41.4183	268.234	738.475	178.312	286.339	283.701
ENSG00000067829	IDH3G	-0.0967472	0.681999	0.871988	1523.26	1091.2	1925.38	2779.18	1483.56	1558.18	1380.63	1310.11	1668.6	1484.76	1388.39	1525.57	1316.36	1375.99	1746.01
ENSG00000067836	ROGDI	-1.01428	0.0240073	0.138733	3910.71	4238.68	9656.25	6412.99	4287.68	5346.2	852.654	1053.98	3045.41	5629.29	3197.71	3481.67	3884.4	3245.47	3247.14
ENSG00000067840	PDZD4	1.96917	6.99772e-07	4.18671e-05	6956.04	5561.28	2761.34	12572.1	6797.26	1026.64	7325.12	4211.99	7281.19	1075.08	5095.45	6985.62	5166.68	5904.33	2310.42
ENSG00000067842	ATP2B3	3.88118	4.02634e-07	2.62393e-05	748.659	46.0607	28.4583	58.4811	529.21	56.9838	421.028	259.078	581.291	15.3068	637.935	280.6	1256.92	1004.36	111.49
ENSG00000067900	ROCK1	-0.0283058	0.942653	0.979367	532.904	673.363	1257.5	611.394	1177.22	908.005	2143.68	1857.71	969.204	1031.86	831.827	786.085	752.582	839.87	1363.76
ENSG00000067955	CBFB	-2.31604	1.12372e-14	4.63315e-12	310.075	418.933	1948.5	556.9	334.806	1794.52	288.072	692.838	282.54	1660.34	270.243	244.132	294.564	306.357	342.432
ENSG00000067992	PDK3	0.573082	0.195812	0.488589	233.44	108.572	188.536	288.418	443.79	113.034	243.753	143.278	145.902	150.367	422.946	123.586	201.038	232.379	102.531
ENSG00000068001	HYAL2	-0.316495	0.504663	0.773271	714.468	1166.87	1582.1	1370.32	733.432	742.658	760.163	2994.12	1508.81	1632.42	650.995	801.28	450.15	752.837	808.3
ENSG00000068024	HDAC4	-0.476468	0.299729	0.609745	403.215	309.265	874.203	152.848	335.788	393.282	86.7106	484.79	470.127	321.442	481.214	341.38	640.699	414.278	446.954
ENSG00000068028	RASSF1	0.116718	0.794859	0.922451	324.222	430.996	247.231	236.583	202.258	281.183	421.992	913.644	467.812	423.187	171.79	209.69	241.246	219.324	287.683
ENSG00000068078	FGFR3	-0.461618	0.670631	0.867279	588.316	319.135	5849.07	105	802.161	46.7081	352.623	4942.11	2775.6	851.777	3814.55	1101.13	531.44	4206.31	60.722
ENSG00000068079	IFI35	-0.667097	0.14857	0.421036	192.175	155.729	179.643	130.253	179.676	311.076	124.285	525.026	148.218	505.124	133.615	111.43	223.764	228.027	355.373
ENSG00000068097	HEATR6	-0.277889	0.587605	0.823267	274.705	228.11	449.997	116.962	206.186	500.71	1167.7	529.933	255.907	442.996	268.234	289.717	347.883	342.911	568.398
ENSG00000068120	COASY	-0.162846	0.551298	0.801625	1158.95	1865.46	2068.56	1656.08	1713.31	1699.24	3084.01	1564.28	1623.44	1636.92	1436.61	1499.24	1173.89	1052.23	1484.21
ENSG00000068137	PLEKHH3	-1.49639	6.08924e-05	0.00158523	1311.04	751.228	3665.78	303.039	884.635	2991.18	1321.86	1737.98	1465.96	2576.04	942.336	1045.41	1160.78	728.467	1436.42
ENSG00000068305	MEF2A	0.255271	0.521282	0.783163	842.978	489.121	1160.56	849.306	1697.6	685.674	730.296	2296.38	720.244	777.945	1160.34	692.89	1193.99	1116.64	737.623
ENSG00000068308	OTUD5	0.0823813	0.753654	0.906054	2951.01	2543.21	3345.63	6048.81	2914.09	2623.12	4224.73	2767.43	2651.7	2991.12	2819.98	2712.81	2429.06	2669.31	3217.27
ENSG00000068323	TFE3	-0.359741	0.138135	0.404176	1407.71	992.498	1937.83	2169.12	1670.1	1850.57	1845.01	1586.85	1283.01	2427.48	1385.37	1746.41	1248.18	1577.04	2465.71
ENSG00000068354	TBC1D25	0.0624812	0.706698	0.881964	755.733	490.217	567.387	571.52	685.322	644.571	782.322	521.101	687.822	672.598	702.231	539.927	728.981	677.988	726.674
ENSG00000068366	ACSL4	-0.313626	0.471263	0.749452	457.448	244.56	583.395	1192.22	358.371	899.597	1128.2	957.805	398.335	810.359	668.074	351.51	433.543	546.568	645.047
ENSG00000068383	INPP5A	0.441031	0.119636	0.374425	1200.21	859.8	733.69	915.761	1699.56	699.687	535.679	972.525	1081.52	838.271	794.656	735.436	1325.1	1288.96	925.762
ENSG00000068394	GPKOW	0.578634	0.0439323	0.206498	1259.16	1095.59	828.848	2345.89	1147.77	851.955	1007.77	675.174	944.887	792.351	1526.02	1180.14	1010.43	1469.99	1113.9
ENSG00000068400	GRIPAP1	-0.147489	0.559133	0.807225	2775.34	2115.5	4106	5235.39	2853.22	3056.58	2841.22	1863.6	2990.98	2721.91	3177.62	3033.92	2700.03	2913.87	3198.36
ENSG00000068438	FTSJ1	0.377328	0.00850542	0.0685567	655.519	496.797	454.443	659.242	616.594	396.084	586.742	526.007	602.134	456.502	599.76	425.459	503.469	583.122	540.526
ENSG00000068489	PRR11	0.275136	0.715448	0.886759	23.5798	21.9337	27.569	14.6203	13.7457	14.0124	151.262	68.695	11.5795	45.0199	35.1618	14.182	19.2297	28.7209	15.9271
ENSG00000068615	REEP1	0.555429	0.274866	0.584495	1823.9	2454.38	1309.97	789.495	1173.3	574.509	783.286	554.467	452.758	352.956	911.193	1254.09	1438.73	1126.21	391.209
ENSG00000068650	ATP11A	2.25976	0.000474152	0.00790236	987.994	584.532	682.11	586.14	1367.7	354.047	4213.17	1600.59	2654.02	321.442	3732.17	5833.85	2314.56	1664.94	466.863
ENSG00000068654	POLR1A	0.0937095	0.664439	0.864538	630.76	671.17	1144.56	877.217	1015.22	727.712	1218.77	925.42	1104.68	784.247	828.814	992.737	978.094	1161.89	932.73
ENSG00000068697	LAPTM4A	0.745906	0.0423403	0.201563	8574.8	13922.4	3575.07	11395.8	13027	5325.65	2821.95	11319	9575.08	7162.67	9160.15	7254.07	6062.61	7019.22	7624.1
ENSG00000068724	TTC7A	0.19398	0.311329	0.621675	465.701	522.021	574.502	580.824	511.537	379.269	339.135	529.933	548.868	442.996	560.579	515.615	614.477	511.755	691.833
ENSG00000068745	IP6K2	0.100207	0.644822	0.854208	4196.03	2149.5	3276.26	3265.64	3417.78	3529.26	4286.4	2399.42	3249.21	2478.8	3115.33	4140.12	3741.06	2974.79	2872.85
ENSG00000068784	SRBD1	-0.0543209	0.839916	0.942211	282.958	273.074	315.709	219.304	371.134	204.581	147.408	263.985	211.905	253.912	278.28	150.936	279.705	293.302	210.039
ENSG00000068796	KIF2A	0.376293	0.222573	0.522439	410.289	726.004	639.422	627.343	533.138	397.019	1075.21	481.846	423.809	352.956	779.587	406.212	529.692	722.375	497.722
ENSG00000068831	RASGRP2	-0.0136297	0.988435	0.994778	51.8756	28.5138	104.051	34.557	46.1463	37.3664	20.2325	792.937	169.061	248.51	19.0878	64.8318	86.5338	89.6441	141.353
ENSG00000068878	PSME4	0.0451711	0.837607	0.941294	947.908	639.366	1152.56	1419.5	1174.28	980.869	878.668	691.857	978.467	793.251	1102.07	1080.87	1053.26	1073.12	1041.23
ENSG00000068885	IFT80	-0.260401	0.302784	0.612936	508.145	326.812	994.262	786.837	866.962	766.946	810.263	603.535	651.925	619.474	785.615	653.383	583.01	716.283	656.993
ENSG00000068903	SIRT2	-0.00926678	0.963609	0.986781	1374.7	909.15	1345.54	1862.09	1611.19	1398.44	1212.99	1168.8	1487.96	1238.95	1442.64	1155.83	1469.33	998.27	1139.78
ENSG00000068912	ERLEC1	0.218436	0.489964	0.761852	2600.85	5753.2	2315.79	3114.12	4351.5	2865.07	1813.22	1699.71	2846.24	2769.63	3662.85	2289.37	2745.48	2681.49	3443.24
ENSG00000068971	PPP2R5B	-0.470978	0.153639	0.427555	1559.8	605.369	2111.25	732.343	1367.7	1408.72	1154.21	934.252	1387.22	994.941	1284.91	613.876	963.234	1549.19	876.985
ENSG00000068976	PYGM	-0.444519	0.636913	0.850745	21.2218	4.38673	49.802	45.19	16.6912	21.4857	17.3421	362.121	67.1611	203.49	32.1479	20.2599	47.2002	80.0705	93.5717
ENSG00000069011	PITX1	-1.73739	4.67712e-06	0.000196253	4740.72	7060.45	26760.6	66534.3	3135.99	13829.3	3712.18	1862.62	3594.27	12692.9	5650	6596.63	6830.92	6337.75	7598.22
ENSG00000069018	TRPC7	3.39443	0.0034013	0.0355813	17.6849	3.29005	7.11457	10.6329	270.005	14.9466	239.899	118.744	12.7374	2.7012	125.578	13.169	11.363	214.102	2.98633
ENSG00000069020	MAST4	-0.591266	0.205385	0.50041	436.227	313.651	1105.43	2452.22	1007.36	1620.77	731.26	1001.97	598.66	1451.44	622.866	925.879	614.477	1327.26	1061.14
ENSG00000069122	ADGRF5	0.496384	0.597322	0.828546	35.3697	61.4143	163.635	106.329	157.094	98.0869	67.4416	2235.53	438.863	527.634	241.109	98.2607	430.921	332.467	248.861
ENSG00000069188	SDK2	-0.36607	0.673628	0.868055	649.624	40.5773	33.7942	120.95	254.296	549.287	40.465	498.529	55.5816	256.614	60.2774	61.7928	483.365	257.618	82.6218
ENSG00000069248	NUP133	0.0708802	0.642199	0.852553	866.558	1005.66	915.112	780.191	777.615	922.951	1029.93	870.464	814.038	784.247	938.317	754.682	1020.92	974.771	1180.6
ENSG00000069275	NUCKS1	-0.455388	0.00491063	0.0467076	6248.65	7173.4	8213.77	7469.64	6651.95	10549.5	6569.77	6506.4	4939.81	9330.83	6625.49	7395.89	5911.39	7259.44	9204.86
ENSG00000069329	VPS35	-0.0661377	0.800198	0.924893	2639.76	2555.27	3023.69	2941.34	2530.19	2672.64	2012.65	1769.39	2094.73	2401.36	3629.7	1617.76	4129.15	2750.25	2268.62
ENSG00000069345	DNAJA2	-0.00526416	0.985629	0.993869	2241.26	2729.64	1863.13	3260.32	1955.82	1848.7	1097.37	1212.96	1316.59	1922.35	1807.32	1813.26	1634.53	1756.33	1632.53
ENSG00000069399	BCL3	0.433573	0.565566	0.810703	60.1285	178.759	62.2525	101.013	145.312	106.494	116.578	939.159	149.375	343.952	66.3051	104.339	186.179	156.66	565.412
ENSG00000069424	KCNAB2	1.10097	0.0387659	0.188921	2191.74	554.922	1054.74	870.571	1250.86	674.464	663.818	705.596	1639.66	409.681	3589.52	1502.27	1797.98	2877.32	706.765
ENSG00000069431	ABCC9	-0.0693915	0.943019	0.979372	2.35798	29.6104	42.6874	7.9747	64.8013	44.8397	20.2325	214.917	362.438	268.319	107.495	68.8838	266.594	139.253	71.6719
ENSG00000069482	GAL	6.17118	2.26607e-11	4.77537e-09	83882.8	19382.8	503.356	948.989	42985.8	425.043	48120.5	23899	66849.6	562.749	69949.9	6454.81	10137.6	56644.7	569.394
ENSG00000069493	CLEC2D	0.330377	0.704753	0.881508	14.1479	16.4502	24.0117	22.595	26.5096	8.40745	19.269	234.544	40.5282	60.3267	17.0786	17.2209	27.0964	13.9253	16.9225
ENSG00000069509	FUNDC1	0.0957031	0.745568	0.901756	488.102	552.728	416.203	901.141	833.58	567.036	392.125	323.848	453.916	573.554	758.49	507.511	523.573	483.904	437
ENSG00000069535	MAOB	-1.77778	0.00153103	0.0191256	1202.57	869.67	1977.85	85.0635	798.234	2111.2	457.639	623.162	364.754	1811.6	264.216	365.692	383.72	281.987	1186.57
ENSG00000069667	RORA	-0.0367895	0.927576	0.9737	346.623	641.56	538.04	316.33	481.1	340.969	145.481	287.538	367.07	370.964	532.45	210.703	793.663	378.594	372.296
ENSG00000069696	DRD4	0.89273	0.138395	0.40456	121.436	172.179	108.497	115.633	51.0555	92.482	376.709	180.57	533.815	81.0359	88.4068	137.768	93.5264	174.066	49.7722
ENSG00000069702	TGFBR3	0.619552	0.0229955	0.135193	2564.3	3364.62	2123.7	3785.32	6349.54	2805.29	5363.53	3652.61	4146.62	2642.67	2274.47	3432.03	3023.44	4184.55	4389.9
ENSG00000069849	ATP1B3	-0.235273	0.50581	0.774081	917.255	345.455	923.116	841.331	721.65	598.797	557.838	1229.64	741.088	788.749	503.316	391.017	372.357	671.896	560.435
ENSG00000069869	NEDD4	0.726306	0.282147	0.592262	107.288	83.3479	13.3398	122.279	155.13	119.573	117.541	557.411	136.638	190.885	177.818	36.4679	134.608	229.768	283.701
ENSG00000069943	PIGB	-0.835856	2.07512e-05	0.00069047	109.646	182.049	305.037	156.836	188.513	268.104	137.774	141.315	142.428	268.319	182.841	167.144	138.978	127.068	211.034
ENSG00000069956	MAPK6	0.255606	0.556271	0.805239	1117.68	640.463	1063.63	1140.38	2488.96	1085.5	604.084	599.609	1028.26	935.514	2568.82	1447.57	979.842	1365.55	748.573
ENSG00000069966	GNB5	-0.505221	0.165837	0.445472	2380.38	1480.52	2025.87	784.179	2405.5	3071.52	850.728	833.172	1440.49	2053.81	1749.05	1975.34	2188.69	1683.22	2381.1
ENSG00000069974	RAB27A	0.922653	0.0112572	0.0834813	845.336	568.082	313.931	453.229	1303.88	297.997	314.085	674.192	802.459	542.04	952.382	624.006	930.894	827.685	452.927
ENSG00000069998	HDHD5	0.954469	0.00113614	0.0152283	971.488	937.664	640.312	729.685	1299.95	383.94	952.853	730.13	1455.54	480.813	1156.32	931.957	1213.22	829.426	458.899
ENSG00000070010	UFD1	-0.105145	0.607862	0.835177	1193.14	1004.56	1262.84	1559.05	1580.76	1147.15	876.741	947.01	1080.37	1115.59	972.475	1005.91	858.345	940.828	1095.98
ENSG00000070018	LRP6	0.313764	0.367498	0.669931	391.425	1228.29	821.733	1527.16	462.445	638.966	1030.89	977.432	710.981	651.889	660.037	1027.18	639.825	805.057	1044.22
ENSG00000070047	PHRF1	-0.281126	0.085093	0.307171	1776.74	1534.26	2759.56	1823.55	2113.9	1802	2312.28	1799.81	1767.03	2094.33	1537.07	1855.81	1585.58	2092.28	1711.17
ENSG00000070061	ELP1	-0.100126	0.690262	0.876625	2212.97	3892.13	2345.14	1718.55	1363.77	2552.13	2625.4	1715.41	2072.73	2278.01	2499.5	1959.14	2111.77	2172.35	2432.86
ENSG00000070081	NUCB2	0.0427211	0.879712	0.95773	2668.06	3316.37	2607.49	2811.08	3660.29	2499.82	1731.32	1497.55	2127.15	2695.79	3239.91	2813.09	2233.27	1932.14	4121.13
ENSG00000070087	PFN2	0.0720073	0.802723	0.925892	4682.95	4520.53	2565.69	4407.35	3821.31	4065.47	6183.43	2755.65	2277.69	3757.36	2871.21	3069.38	2532.21	3436.07	3123.7
ENSG00000070159	PTPN3	-0.239249	0.677789	0.870438	371.382	483.637	350.393	93.0382	431.026	293.327	579.998	464.182	164.429	445.697	258.188	266.418	345.261	202.787	30.8587
ENSG00000070182	SPTB	-0.462911	0.198451	0.491423	1367.63	933.277	2250.87	2508.04	1190.97	1737.54	1111.82	500.492	770.036	1360.5	1771.15	1383.75	1381.92	1180.17	1425.47
ENSG00000070190	DAPP1	-1.56688	0.03092	0.164507	1.17899	5.48342	19.5651	5.31647	11.782	13.0783	1.9269	73.6018	9.26359	19.8088	1.00462	2.02599	2.62224	12.1846	9.95443
ENSG00000070193	FGF10	3.42063	0.0709595	0.275329	5.89495	0	0	0	0.981837	0	27.9401	30.4221	11.5795	3.6016	0	0	1.74816	20.0176	55.7448
ENSG00000070214	SLC44A1	-0.359241	0.500361	0.769871	323.043	800.579	655.43	606.077	206.186	556.76	676.343	1669.29	468.969	831.968	290.336	404.186	357.498	195.825	376.278
ENSG00000070269	TMEM260	-0.103378	0.753654	0.906054	543.515	1415.82	835.962	1097.85	767.797	851.955	760.163	531.896	502.55	622.176	520.394	681.747	786.671	525.68	468.854
ENSG00000070366	SMG6	-0.386409	0.139046	0.405547	697.962	583.435	1420.25	760.255	878.744	1061.21	1276.57	794.899	679.716	1177.72	1221.62	801.28	1227.21	1036.56	1236.34
ENSG00000070367	EXOC5	0.469515	0.161245	0.43952	1369.99	2550.88	1459.38	1342.41	1609.23	1180.78	3773.84	1561.34	1088.47	1146.21	1836.45	1585.34	1506.91	1684.09	1061.14
ENSG00000070371	CLTCL1	0.76742	0.186216	0.474892	568.273	254.43	1365.11	1188.23	3114.39	861.297	2122.48	1042.2	1597.97	663.594	2477.4	3885.86	986.835	1521.34	917.799
ENSG00000070388	FGF22	1.07807	0.111845	0.359728	91.9613	6.5801	32.0156	7.9747	111.929	43.9056	118.505	48.0865	157.481	27.012	69.319	59.7668	91.7782	63.5342	41.8086
ENSG00000070404	FSTL3	-0.15796	0.79283	0.921836	277.063	84.4446	383.298	61.1394	186.549	326.956	208.105	737.981	756.141	299.833	268.234	129.664	372.357	327.245	212.029
ENSG00000070413	DGCR2	-0.250849	0.341024	0.649319	4984.77	3078.39	6468.04	3829.19	6250.38	5519.96	2514.61	3316.99	5163.3	4201.26	4940.73	5622.13	4825.79	4247.22	5648.14
ENSG00000070423	RNF126	-0.0598498	0.773441	0.91494	1347.59	1285.31	1412.24	1816.9	1694.65	1386.3	1154.21	1029.44	1350.17	1286.67	980.512	1387.81	960.612	1573.56	1098.97
ENSG00000070444	MNT	-0.540466	0.00780645	0.0642888	837.083	687.62	978.254	647.28	511.537	972.462	985.611	676.155	612.555	1184.92	695.199	582.473	700.137	691.914	995.443
ENSG00000070476	ZXDC	0.272008	0.230792	0.532694	765.165	455.124	744.362	729.685	687.286	797.774	975.013	762.515	940.255	463.705	985.535	890.424	750.833	873.813	871.013
ENSG00000070495	JMJD6	0.434435	0.0785842	0.292828	865.379	820.319	452.665	1234.75	705.941	854.757	1426.87	960.749	1014.36	787.849	1038.78	878.268	671.292	879.905	830.2
ENSG00000070501	POLB	0.218441	0.57047	0.813548	580.063	679.944	293.476	172.785	147.276	309.207	282.291	261.041	350.859	277.323	322.484	416.342	308.55	261.97	312.569
ENSG00000070540	WIPI1	0.249547	0.52817	0.788141	149.732	180.953	212.548	295.064	144.33	166.281	523.154	403.338	192.22	218.797	247.137	150.936	156.46	176.677	221.984
ENSG00000070601	FRMPD1	-4.04077	2.31788e-08	2.36349e-06	29.4748	23.0303	786.16	21.2659	32.4006	1043.46	18.3056	17.6644	31.2646	286.327	23.1063	18.2339	20.9779	60.0529	218.002
ENSG00000070610	GBA2	0.132558	0.688635	0.875437	2449.94	3908.58	3802.74	6488.75	1778.11	2659.56	5029.22	2730.14	3161.2	2497.71	2723.53	2707.74	2932.53	2778.97	2603.08
ENSG00000070614	NDST1	-0.106783	0.850792	0.946344	1038.69	366.292	1425.58	158.165	648.013	382.072	1097.37	2213.94	787.406	840.072	530.441	559.174	963.234	1055.71	416.095
ENSG00000070669	ASNS	0.259586	0.388941	0.686643	1388.85	1523.29	1197.03	1721.21	1169.37	780.025	968.269	537.784	1050.26	752.733	970.465	1160.89	773.559	1006.97	804.318
ENSG00000070718	AP3M2	0.219928	0.503003	0.772298	1175.45	1083.52	1085.86	521.014	742.269	1002.35	1839.23	794.899	963.414	817.562	1232.67	1633.96	1643.27	1037.44	868.026
ENSG00000070729	CNGB1	-4.49577	NA	NA	7.07394	3.29005	356.618	1.32912	11.782	5.60497	2.89035	4.90679	2.3159	8.10359	1.00462	6.07798	0	22.6286	1.99089
ENSG00000070731	ST6GALNAC2	-2.03851	NA	NA	3.53697	7.67678	16.0078	3.98735	13.7457	5.60497	27.9401	99.1171	92.6359	278.223	4.01849	1.013	1.74816	8.70332	27.8724
ENSG00000070756	PABPC1	0.746218	0.0029272	0.0315618	9532.14	11983.5	4570.22	7692.93	6756.02	3965.51	6919.51	8980.4	6841.16	6015.56	8281.1	11647.4	6374.65	7586.68	5038.93
ENSG00000070759	TESK2	-0.660355	0.115135	0.3662	95.4982	46.0607	180.532	151.519	91.3109	202.713	185.946	213.936	82.2144	130.558	89.4114	54.7018	73.4226	87.0332	129.408
ENSG00000070761	CFAP20	0.154713	0.655952	0.859407	2182.31	1870.94	1216.59	2508.04	1490.43	1474.11	644.549	783.123	957.624	1247.05	1187.46	1687.65	1431.74	1321.16	1471.27
ENSG00000070770	CSNK2A2	0.477252	0.224202	0.524706	1537.4	2221.88	1158.79	4020.58	1516.94	1095.77	770.761	954.861	1090.79	1180.42	1295.96	1754.51	1352.2	1416.9	1197.52
ENSG00000070778	PTPN21	-0.241506	0.589612	0.824165	90.7823	252.237	364.622	438.608	245.459	312.944	455.712	693.82	253.591	380.869	257.183	326.185	197.542	187.121	183.162
ENSG00000070785	EIF2B3	-0.174847	0.417007	0.709451	525.83	377.259	521.142	366.836	464.409	399.821	578.071	377.823	318.436	461.905	467.149	300.86	450.15	323.763	349.401
ENSG00000070808	CAMK2A	3.81245	1.09419e-06	6.23197e-05	1836.87	615.239	47.134	329.621	169.858	26.1565	95.3817	211.973	129.69	38.7171	128.592	908.658	781.426	959.105	129.408
ENSG00000070814	TCOF1	0.342956	0.269249	0.577732	1116.5	950.824	1511.85	2407.03	1187.04	664.189	1653.28	1123.65	1200.79	822.064	1003.62	1344.25	876.701	1302.89	1047.21
ENSG00000070831	CDC42	-0.260508	0.14897	0.421381	2536.01	2786.67	3052.15	3515.51	2807.07	3386.33	3545.5	3570.18	2334.43	3887.92	2370.91	2565.92	2264.74	2777.23	3408.4
ENSG00000070882	OSBPL3	-3.14205	1.17683e-06	6.60349e-05	12.9689	41.674	673.216	26.5823	26.5096	545.55	43.3553	223.749	57.8975	368.263	109.504	24.3119	45.4521	34.8133	71.6719
ENSG00000070886	EPHA8	3.547	0.00011447	0.00258457	196.891	2.19337	9.78254	65.1267	67.7468	10.2758	15.4152	43.1797	127.374	10.8048	293.35	36.4679	385.469	164.493	44.7949
ENSG00000070950	RAD18	0.232903	0.462801	0.743371	180.386	96.5081	104.051	124.937	178.694	127.98	112.724	150.148	119.269	96.3427	81.3744	71.9228	208.031	118.365	100.54
ENSG00000070961	ATP2B1	-0.529874	0.0444392	0.207893	1823.9	3395.33	2597.71	2675.51	1211.59	2526.91	1901.85	1557.41	1512.28	3290.96	1964.04	1670.43	1789.24	1708.46	2107.35
ENSG00000070985	TRPM5	1.29266	0.331291	0.641019	15.3269	0	1.77864	11.962	1.96367	0	0.963451	21.5899	1.15795	5.40239	0	6.07798	5.24447	1396.01	2.98633
ENSG00000071051	NCK2	0.645885	0.319607	0.630307	2712.86	1456.4	914.223	142.215	2622.49	351.245	522.191	2019.63	1218.16	1337.09	584.69	1430.35	1350.45	1865.99	363.337
ENSG00000071054	MAP4K4	-1.03914	0.0178121	0.113592	825.293	604.272	1791.09	788.166	889.544	1676.82	749.565	3079.5	918.254	2604.85	761.504	564.239	1069	910.367	659.979
ENSG00000071073	MGAT4A	-0.184038	0.61199	0.837086	800.535	777.548	1060.07	257.849	701.032	1081.76	662.855	670.267	883.515	937.315	1377.34	1135.57	1157.28	1305.5	1109.92
ENSG00000071082	RPL31	-0.0516142	0.863067	0.951738	10416.4	16194.7	6671.69	10420.3	11431.5	11498.6	4824	10016.7	11344.4	11947.4	9934.71	6819.49	7725.11	7309.91	9801.13
ENSG00000071127	WDR1	0.304825	0.389345	0.686862	2615	1597.87	2226.86	1706.59	4104.08	2346.61	5175.66	5840.06	3048.88	3118.08	3202.74	2262.02	2727.12	3137.55	2585.17
ENSG00000071189	SNX13	0.383753	0.058781	0.246701	805.251	1085.72	988.926	1589.62	1058.42	798.708	1471.19	976.45	886.989	823.865	1318.06	1110.24	1075.12	1249.8	1003.41
ENSG00000071205	ARHGAP10	-0.863901	0.116531	0.368907	81.3503	322.425	469.562	249.874	331.861	313.878	56.8436	569.187	196.851	424.088	98.453	90.1567	169.571	231.508	255.829
ENSG00000071242	RPS6KA2	3.9491	9.33945e-13	2.60488e-10	4210.18	5270.66	96.0467	1586.97	2041.24	112.099	526.044	1476.94	2938.88	289.028	3340.37	1241.93	2330.29	4416.93	1336.88
ENSG00000071243	ING3	0.545237	0.0952089	0.326948	286.495	379.452	158.299	711.077	221.895	271.841	282.291	328.755	328.858	311.538	299.378	392.03	285.824	302.875	512.653
ENSG00000071246	VASH1	0.128657	0.704666	0.881508	584.779	855.413	492.684	423.988	253.314	526.867	414.284	1007.85	794.353	634.781	446.052	512.576	789.293	542.217	610.207
ENSG00000071282	LMCD1	0.524831	0.527874	0.787975	94.3192	40.5773	50.6913	49.1773	193.422	28.959	98.272	804.713	242.011	293.53	103.476	51.6628	81.2893	303.746	84.6127
ENSG00000071462	BUD23	0.131484	0.716447	0.886879	2498.28	3350.37	2199.29	7093.5	2108	2626.86	2445.24	1840.04	2422.43	2737.21	2300.59	2466.65	1665.12	2226.31	2727.51
ENSG00000071537	SEL1L	0.593585	0.0998899	0.336641	1688.31	4995.39	1699.49	2934.69	2418.26	1582.47	4639.98	2291.47	1648.92	1708.96	2202.13	1469.86	2050.59	1764.16	2021.75
ENSG00000071539	TRIP13	-0.383147	0.446485	0.732168	62.4865	53.7375	143.181	49.1773	67.7468	64.4571	63.5878	59.8628	19.6851	32.4144	46.2126	97.2477	81.2893	111.402	22.8952
ENSG00000071553	ATP6AP1	0.488793	0.0286628	0.156636	9270.4	10353.8	7347.57	15166.6	11025	6837.13	11107.6	5707.57	10883.6	7298.63	9369.11	10168.5	9409.45	7347.34	10782.6
ENSG00000071564	TCF3	-0.207447	0.38857	0.686369	523.472	482.541	791.496	607.406	787.433	814.589	586.742	1083.42	728.35	823.865	566.607	581.46	709.752	777.206	981.507
ENSG00000071575	TRIB2	-0.876833	0.17664	0.46158	348.981	347.649	743.473	45.19	113.893	319.483	102.126	1000	302.225	642.885	141.652	164.105	362.743	309.838	476.817
ENSG00000071626	DAZAP1	-0.34897	0.136911	0.402275	1687.14	1445.43	3117.07	3363.99	1881.2	2340.07	2338.3	2371.94	2192	2355.44	1840.47	2270.13	1566.35	1891.23	1691.26
ENSG00000071655	MBD3	-0.301743	0.242497	0.547162	2375.67	1985	3157.98	4810.07	2469.32	3025.75	2341.19	2409.23	2554.44	2898.38	1875.63	2626.7	1893.25	2326.4	1809.72
ENSG00000071794	HLTF	-0.209358	0.546541	0.798298	910.181	938.761	1607.89	507.723	1031.91	1335.85	2438.5	1210.99	816.354	1054.37	1505.93	902.58	1188.75	1169.73	1208.47
ENSG00000071859	FAM50A	-0.0603331	0.783566	0.918141	2579.63	1199.77	2375.38	2522.66	2372.12	2302.71	2475.11	1982.34	3164.68	2317.63	1993.17	2483.87	1978.04	2104.46	1982.92
ENSG00000071889	FAM3A	0.122981	0.691496	0.877486	1625.83	985.918	1549.2	3527.48	2626.41	1641.32	1831.52	1554.47	2054.2	1850.32	1592.33	1826.43	1364.44	1704.98	1266.2
ENSG00000071894	CPSF1	0.334705	0.344044	0.651716	3816.39	5075.45	4909.06	2325.95	4265.1	1753.42	3216	3237.5	4121.14	2992.93	3631.71	7748.41	4391.37	2262.86	4614.87
ENSG00000071909	MYO3B	-1.40339	0.0818393	0.299935	3.53697	15.3536	34.6835	9.30382	7.8547	36.4323	13.4883	9.81357	2.3159	28.8128	18.0832	12.156	0	42.6462	435.009
ENSG00000071967	CYBRD1	-1.98484	NA	NA	14.1479	53.7375	40.0195	49.1773	48.11	56.9838	61.6609	5987.26	727.192	1372.21	46.2126	39.5069	92.6523	100.958	176.193
ENSG00000071991	CDH19	-0.159442	0.946284	0.980401	0	2.19337	1.77864	0	0	0.934161	0	38.2729	166.745	9.90439	2.00925	0	2.62224	0	0
ENSG00000071994	PDCD2	-0.0330785	0.934224	0.976427	765.165	1980.61	631.418	766.9	416.299	807.115	573.254	668.304	640.346	794.152	616.838	657.435	335.646	644.916	663.961
ENSG00000072041	SLC6A15	3.80159	0.00589842	0.0530081	1.17899	83.3479	4.44661	0	2.94551	1.86832	831.459	184.495	128.532	2.7012	1.00462	56.7278	5.24447	8.70332	11.9453
ENSG00000072042	RDH11	0.299774	0.430961	0.720676	1617.58	2882.08	1309.08	2630.32	1159.55	1310.63	3231.42	1840.04	1540.07	1634.22	1030.74	1589.39	741.219	1301.15	1383.67
ENSG00000072062	PRKACA	-0.149153	0.559954	0.807488	4462.48	5963.76	3805.41	5647.42	2824.75	4095.36	3865.37	2714.43	2689.92	4684.77	3665.87	2970.11	3510.3	3569.23	3516.9
ENSG00000072071	ADGRL1	0.126115	0.495218	0.765772	5300.74	4824.31	4887.71	4164.12	5289.16	4574.59	6583.26	3513.26	5335.83	3992.37	4964.84	4903.92	5385.2	5020.07	3449.21
ENSG00000072110	ACTN1	-0.416299	0.418439	0.710739	672.025	459.51	907.108	199.367	663.722	296.129	1423.98	6430.83	940.255	1208.34	514.367	249.197	567.277	634.472	275.738
ENSG00000072121	ZFYVE26	0.377673	0.171935	0.454421	535.262	607.562	666.102	1085.89	710.85	758.539	1549.23	864.576	700.559	558.247	681.134	811.41	902.923	914.718	939.698
ENSG00000072133	RPS6KA6	0.586445	0.0813259	0.298746	979.741	1415.82	544.265	1521.84	1143.84	744.526	1006.81	441.611	897.411	801.355	1385.37	733.41	1542.75	832.907	653.011
ENSG00000072134	EPN2	-0.413415	0.274032	0.583459	687.351	229.207	1279.73	552.913	564.556	762.276	1183.12	1259.08	671.611	738.327	505.325	699.981	604.862	713.672	677.897
ENSG00000072135	PTPN18	0.258981	0.39936	0.694951	1437.19	1737.15	1077.86	952.977	2025.53	1080.82	578.071	1114.82	1351.33	1073.28	1379.35	1040.35	1825.95	1107.93	918.794
ENSG00000072163	LIMS2	0.486835	0.596235	0.827955	569.452	38.3839	149.406	81.0761	207.168	85.0087	48.1726	1757.61	588.238	519.53	122.564	85.0917	130.238	402.093	196.102
ENSG00000072182	ASIC4	0.915563	0.416564	0.709016	96.6772	1254.61	126.284	1771.71	39.2735	650.176	51.0629	61.8255	99.5836	97.2431	46.2126	1202.43	83.9115	90.5145	1794.78
ENSG00000072195	SPEG	-1.0217	0.164274	0.443852	1460.77	462.8	8674.44	1876.71	1441.34	4773.56	544.35	1577.04	2412.01	2497.71	1336.15	2107.03	1826.82	4219.37	12150.4
ENSG00000072201	LNX1	-0.879787	0.134609	0.398968	53.0546	52.6408	325.492	87.7217	363.28	244.75	296.743	203.141	127.374	314.239	115.532	79.0137	46.3262	199.306	297.638
ENSG00000072210	ALDH3A2	0.16832	0.64935	0.856676	1713.07	1147.13	1713.72	979.559	3964.66	1359.2	2170.66	1407.27	990.047	1328.99	1893.71	1598.51	1475.44	1208.02	1237.34
ENSG00000072274	TFRC	0.406233	0.273745	0.583165	560.021	738.068	381.519	742.976	138.439	495.105	534.715	703.633	858.04	549.243	863.975	453.822	624.966	675.377	664.956
ENSG00000072310	SREBF1	-3.45501	4.15607e-16	2.54271e-13	1908.79	3730.92	61413.9	5029.38	1562.1	25686.6	4981.04	2712.47	3679.96	20967.6	1699.82	3789.62	1977.17	2972.18	5375.39
ENSG00000072364	AFF4	0.310368	0.196499	0.488888	1793.24	3576.28	2457.2	4009.94	2776.64	2440.03	4098.52	2290.49	1987.04	2275.31	2925.46	2882.99	2715.76	3415.18	3104.79
ENSG00000072401	UBE2D1	1.02276	0.0539531	0.234851	402.036	179.856	304.148	587.47	1790.87	260.631	342.025	331.699	339.279	231.402	722.324	577.408	382.846	572.678	241.893
ENSG00000072415	MPP5	0.832265	0.0155397	0.103996	747.48	815.932	522.921	758.926	1649.49	538.077	1394.11	709.521	639.188	524.932	1535.06	684.786	977.22	906.885	474.826
ENSG00000072422	RHOBTB1	0.777905	0.29294	0.602591	236.977	99.7982	39.1301	93.0382	45.1645	38.3006	72.2589	542.691	157.481	196.287	137.633	28.3639	250.861	167.104	45.7904
ENSG00000072501	SMC1A	0.170998	0.600272	0.829791	1163.66	967.275	1740.4	2025.57	1177.22	1094.84	3046.43	1839.06	1411.54	1240.75	1404.46	901.567	1379.3	1734.57	1305.03
ENSG00000072506	HSD17B10	0.0530458	0.859291	0.950225	1947.69	1246.93	1525.19	3522.16	2111.93	1802.93	2540.62	1485.77	1579.44	1943.06	1607.4	1179.13	1359.19	1676.26	1620.58
ENSG00000072518	MARK2	-0.351901	0.127044	0.387256	1303.96	1070.36	1555.42	833.356	1123.22	1791.72	2236.17	1224.73	1299.22	1577.5	1142.26	1195.34	1436.98	1378.61	1187.56
ENSG00000072571	HMMR	2.07339	0.00228316	0.0261963	44.8016	75.6711	18.6758	42.5317	30.437	7.47329	204.252	59.8628	22.001	14.4064	61.282	47.6108	53.3188	32.2023	8.95899
ENSG00000072609	CHFR	-0.40988	0.132007	0.395272	363.129	396.999	962.246	828.04	470.3	739.856	789.067	703.633	664.663	628.478	479.205	717.202	441.41	507.403	656.993
ENSG00000072657	TRHDE	5.69918	0.000955279	0.0133121	4.71596	9.87015	0.889322	144.874	0.981837	3.73664	568.436	223.749	2.3159	0.900399	1.00462	113.456	0	0	76.6491
ENSG00000072682	P4HA2	-1.05212	0.0181263	0.115054	1090.57	1355.5	3123.3	837.343	915.072	940.7	564.582	637.882	605.607	683.403	575.649	500.42	374.106	1143.62	558.444
ENSG00000072736	NFATC3	-0.122229	0.639336	0.851423	176.849	271.977	401.084	252.532	246.441	237.277	228.338	321.885	266.328	289.028	303.396	216.781	451.024	328.115	342.432
ENSG00000072756	TRNT1	0.170856	0.577479	0.817674	379.635	459.51	299.701	253.861	379.971	291.458	629.134	329.736	294.119	307.936	246.133	251.223	343.513	181.899	299.628
ENSG00000072778	ACADVL	-0.86733	0.00272794	0.0299931	10449.4	9935.95	27786.9	8108.94	10183.6	14486	18037.7	13112.9	16401.2	18858	10922.3	9154.45	8825.57	6772.92	12133.5
ENSG00000072786	STK10	-0.192085	0.631381	0.847772	246.409	153.536	464.226	233.925	291.606	254.092	398.869	753.682	319.594	392.574	223.026	195.508	297.187	459.535	315.556
ENSG00000072803	FBXW11	0.259106	0.222763	0.522757	2059.7	2885.37	2283.78	2570.51	2785.47	1797.33	3253.58	1878.32	1417.33	1910.65	2417.12	2086.77	2438.68	2409.95	2478.65
ENSG00000072818	ACAP1	-0.774852	0.0101975	0.0778296	532.904	413.45	668.77	459.874	757.978	1123.8	267.839	492.641	471.285	990.439	855.938	471.043	486.862	523.94	771.468
ENSG00000072832	CRMP1	-0.00705458	0.981478	0.993102	6970.19	4381.25	6404.89	7036.34	5595.49	5903.9	5109.18	2243.38	5173.72	4227.37	5087.41	9116.97	4796.94	5694.58	4617.86
ENSG00000072840	EVC	-1.76515	NA	NA	3.53697	8.77347	6.22525	7.9747	3.92735	12.1441	20.2325	716.391	64.8452	184.582	10.0462	7.09098	21.852	33.9429	38.8223
ENSG00000072849	DERL2	-0.364389	0.0575315	0.243699	608.359	676.653	899.104	705.761	1065.29	988.343	705.246	679.099	974.993	956.224	618.847	749.618	558.536	693.654	800.336
ENSG00000072858	SIDT1	-1.89426	0.0922079	0.320472	9.43192	26.3204	466.894	291.077	25.5278	644.571	39.5015	66.7323	24.3169	262.016	12.0555	28.3639	14.8593	33.0726	906.849
ENSG00000072864	NDE1	0.0752411	0.856973	0.949212	60.1285	60.3176	72.9244	47.8482	131.566	80.3379	57.8071	168.793	107.689	108.948	155.716	50.6498	114.504	80.0705	68.6856
ENSG00000072952	MRVI1	0.632017	0.505869	0.774109	21.2218	32.9005	83.5962	23.9241	61.8557	51.3789	42.3919	1016.69	201.483	211.594	61.282	53.6888	206.283	144.475	281.71
ENSG00000072954	TMEM38A	-1.28577	0.0135498	0.0950389	739.227	348.745	1575.88	136.899	205.204	293.327	328.537	202.16	398.335	676.199	315.451	258.314	325.157	726.727	191.125
ENSG00000072958	AP1M1	0.155983	0.561926	0.808671	1688.31	1331.37	1380.23	2404.37	1290.13	1212.54	1806.47	1154.08	980.783	1052.57	1025.72	1147.73	1027.04	1325.51	1068.11
ENSG00000073008	PVR	1.62428	1.8258e-10	3.36195e-08	1615.22	1902.75	633.197	2562.54	1696.61	442.792	2543.51	1326.79	1496.07	539.339	1410.49	1313.86	1177.38	1534.39	1343.85
ENSG00000073050	XRCC1	0.617379	0.0782747	0.292178	2851.98	3698.02	1762.64	2723.36	2053.02	1248.04	1121.46	1132.49	2346.01	1528.88	3118.35	2943.77	2772.58	1709.33	1387.65
ENSG00000073060	SCARB1	0.84683	0.0329853	0.171644	624.865	318.038	396.637	285.76	621.503	327.891	459.566	384.692	481.707	275.522	580.672	740.501	1007.81	1248.06	438.99
ENSG00000073067	CYP2W1	1.50467	0.326876	0.637156	0	2.19337	0.889322	67.7849	2.94551	2.80248	6.74416	1.96271	0	4.50199	0	2.02599	2.62224	190.603	4.97722
ENSG00000073111	MCM2	0.450897	0.256756	0.563948	819.398	398.096	635.865	475.824	1029.95	489.5	977.903	404.319	423.809	352.956	801.689	398.108	1316.36	542.217	493.74
ENSG00000073146	MOV10L1	1.80695	0.0256159	0.145274	22.4008	4.38673	4.44661	29.2406	65.7831	5.60497	40.465	39.2543	24.3169	9.00399	6.02774	6.07798	8.74078	12.1846	7.96355
ENSG00000073150	PANX2	1.50678	0.0135234	0.0949594	557.663	160.116	114.722	39.8735	734.414	200.845	222.557	213.936	1016.68	149.466	517.381	472.056	536.684	535.254	278.724
ENSG00000073169	SELENOO	-0.0818252	0.771664	0.914369	684.994	528.601	985.368	903.799	1020.13	879.046	733.186	823.359	1476.39	737.427	541.492	1013	776.182	630.12	703.778
ENSG00000073282	TP63	-1.52263	NA	NA	1.17899	2.19337	0.889322	3.98735	12.7639	0	9.63451	308.146	17.3692	46.8207	6.02774	0	1.74816	1.74066	4.97722
ENSG00000073331	ALPK1	0.880045	0.260598	0.567834	16.5059	19.7403	17.7864	128.924	56.9466	14.0124	65.5147	232.582	41.6862	75.6335	25.1156	16.2079	23.6001	68.7562	95.5625
ENSG00000073350	LLGL2	0.038557	0.947969	0.981104	681.457	175.469	1508.29	1015.45	830.634	1319.04	3343.18	1474	1470.6	605.968	1341.17	321.12	900.301	1517.86	1033.27
ENSG00000073417	PDE8A	-0.906565	0.00950029	0.0741187	397.32	282.944	1271.73	612.723	635.249	677.267	272.657	713.447	501.392	861.682	353.627	396.082	475.499	442.999	913.817
ENSG00000073464	CLCN4	0.0903722	0.744956	0.901484	1298.07	2034.35	1367.78	1961.78	1671.09	1661.87	1923.05	933.271	929.833	1304.68	2128.8	1029.2	1741.16	1487.4	1319.96
ENSG00000073536	NLE1	1.28475	0.0136262	0.0952729	325.401	304.878	121.837	126.266	193.422	116.77	982.72	459.275	228.116	135.06	215.994	189.43	268.342	224.546	122.44
ENSG00000073578	SDHA	0.190143	0.29073	0.600195	2545.44	2201.04	2435.85	3017.09	2465.39	2198.08	3532.01	2369	2571.81	2848.86	3405.67	3608.29	2842.5	3176.71	2411.96
ENSG00000073584	SMARCE1	0.525343	0.127271	0.387513	1490.24	1586.9	1041.4	1392.91	2673.54	1298.48	3559.95	1978.42	1027.1	1205.63	1718.91	1252.06	1296.26	1368.16	1066.12
ENSG00000073605	GSDMB	0.528664	0.323546	0.634245	20.0428	57.0275	40.9088	106.329	24.5459	39.2348	74.1858	154.073	85.6882	54.9243	87.4022	35.4549	60.3114	40.0352	34.8405
ENSG00000073614	KDM5A	0.184693	0.490303	0.762199	524.651	1058.3	768.374	1326.46	821.798	861.297	1407.6	1144.26	780.458	808.558	632.912	850.917	770.063	843.351	924.767
ENSG00000073670	ADAM11	-1.37938	0.00953614	0.0743612	58.9495	39.4806	466.894	134.241	41.2372	232.606	161.86	115.8	68.319	107.147	76.3513	53.6888	200.164	119.235	170.221
ENSG00000073711	PPP2R3A	-0.0447884	0.941406	0.978892	113.183	18.6436	201.876	111.646	306.333	91.5478	165.714	196.271	78.7406	118.853	195.901	28.3639	81.2893	106.18	196.102
ENSG00000073712	FERMT2	0.414573	0.361538	0.664113	536.441	1752.5	760.37	903.799	872.853	544.616	819.897	1877.34	741.088	623.976	583.686	396.082	703.633	792.872	304.606
ENSG00000073737	DHRS9	1.04992	0.385335	0.683661	2.35798	5.48342	12.4505	5.31647	52.0374	20.5515	10.598	92.2476	52.1077	8.10359	15.0693	2.02599	2.62224	100.088	0
ENSG00000073756	PTGS2	1.38984	0.241838	0.54667	7.07394	36.1905	16.0078	11.962	7.8547	7.47329	4.81726	657.509	91.478	12.6056	2.00925	8.10397	5.24447	0.870332	191.125
ENSG00000073792	IGF2BP2	-2.59643	0.0380324	0.186695	5.89495	9.87015	617.189	23.9241	15.7094	260.631	7.70761	100.098	23.159	89.1395	2.00925	3.03899	3.49631	10.444	434.013
ENSG00000073803	MAP3K13	-0.623004	0.0377821	0.185689	628.402	366.292	969.361	551.583	963.182	1164.9	995.245	645.733	590.554	1062.47	866.989	407.225	584.758	685.821	1015.35
ENSG00000073849	ST6GAL1	-0.77205	0.143105	0.412473	74.2764	140.375	236.56	204.684	82.4743	283.985	53.9533	1265.95	208.431	233.203	74.3421	83.0657	111.008	124.457	450.936
ENSG00000073910	FRY	0.0736543	0.838791	0.941612	1397.1	736.971	1712.83	2760.58	1213.55	1139.68	598.303	1319.93	1039.84	1052.57	1526.02	1839.6	1272.66	1151.45	1584.75
ENSG00000073921	PICALM	0.0138867	0.96297	0.986781	1511.47	1113.13	1667.48	1695.95	1750.62	1554.44	2062.75	3578.03	1417.33	1743.17	1347.2	1300.69	1346.08	1342.05	1586.74
ENSG00000073969	NSF	-0.0105888	0.979694	0.992092	2244.8	3575.19	3054.82	1252.03	2089.35	2402.66	6413.7	2012.76	1756.61	2049.31	2950.58	1233.83	2336.41	2095.76	1845.55
ENSG00000074047	GLI2	-1.85474	0.107637	0.351941	5.89495	4.38673	8.00389	0	1.96367	1.86832	0.963451	168.793	22.001	41.4183	1.00462	0	5.24447	2.61099	8.95899
ENSG00000074054	CLASP1	-0.301592	0.326716	0.637041	2357.98	2408.32	2547.02	1777.03	1352.97	2244.79	865.179	1264.97	1133.63	1762.98	1599.36	2101.97	2604.75	2166.26	1640.49
ENSG00000074071	MRPS34	-0.514523	0.112438	0.361013	1531.51	1908.23	1772.42	2481.46	1853.71	2131.76	820.861	833.172	1122.05	1933.16	951.378	1074.79	1377.55	968.679	1424.48
ENSG00000074181	NOTCH3	0.301775	0.752608	0.905665	176.849	288.428	657.209	178.102	729.505	448.397	313.122	7491.68	3435.64	3617.8	813.744	724.293	3331.99	1931.27	3874.27
ENSG00000074201	CLNS1A	-0.0366131	0.836931	0.94125	1505.57	1431.17	1192.58	1428.8	1856.65	1718.86	1808.4	1126.6	1097.74	1505.47	1452.68	1261.18	1371.43	1369.9	1513.07
ENSG00000074211	PPP2R2C	0.749932	0.114712	0.36516	3362.48	924.504	1862.24	592.786	2192.44	1075.22	2521.35	1158.98	1945.35	907.602	2821.98	2340.02	3498.94	3422.14	1083.04
ENSG00000074219	TEAD2	-1.07239	NA	NA	17.6849	15.3536	25.7903	11.962	24.5459	16.8149	24.0863	747.794	158.639	262.916	27.1248	29.3769	73.4226	53.0902	104.522
ENSG00000074266	EED	-0.560726	0.00330723	0.0347892	262.915	316.941	400.195	321.646	289.642	528.735	376.709	342.494	304.541	398.877	270.243	317.068	204.534	236.73	358.36
ENSG00000074276	CDHR2	0.935496	0.0565063	0.241591	66.0235	91.0247	47.134	151.519	35.3461	37.3664	165.714	40.2356	40.5282	53.1235	61.282	138.781	56.8151	131.42	74.6582
ENSG00000074317	SNCB	1.56214	0.0263332	0.148002	3590.03	3851.55	478.455	562.216	1091.8	498.842	147.408	239.451	765.404	617.674	1198.51	1808.2	2847.75	1624.04	1112.91
ENSG00000074319	TSG101	-0.0471736	0.791105	0.921403	2050.26	2069.44	1510.96	1548.42	1576.83	1755.29	1827.67	1212.96	1252.9	1721.56	1685.76	1392.87	1429.99	1493.49	1769.9
ENSG00000074356	NCBP3	-0.137157	0.653463	0.858281	802.893	333.392	994.262	692.47	993.619	932.293	1455.77	1144.26	929.833	1006.65	929.276	792.163	1003.44	906.015	683.869
ENSG00000074370	ATP2A3	0.68149	0.469199	0.747738	76.6344	64.7043	238.338	39.8735	877.762	56.9838	55.8802	1765.46	537.288	448.399	209.966	62.8058	501.721	275.025	303.61
ENSG00000074410	CA12	0.727501	0.501599	0.770809	23.5798	12.0635	23.1224	9.30382	30.437	14.0124	196.544	190.383	23.159	41.4183	7.03236	6.07798	4.37039	6.09232	10.9499
ENSG00000074416	MGLL	-1.46668	0.0111401	0.0829215	713.289	129.409	3988.61	489.115	1517.92	2593.23	458.603	1653.59	875.41	1722.46	565.602	639.201	1926.47	1284.61	1763.93
ENSG00000074527	NTN4	0.353525	0.716071	0.886851	9.43192	38.3839	43.5768	95.6964	75.6015	45.7739	105.016	949.954	411.072	342.152	39.1803	50.6498	80.4152	135.772	214.02
ENSG00000074582	BCS1L	-0.08062	0.743089	0.900711	913.718	479.251	748.809	370.824	655.867	604.402	439.334	599.609	814.038	609.57	596.746	713.15	714.996	574.419	552.471
ENSG00000074590	NUAK1	0.0700051	0.897424	0.964123	756.912	377.259	253.457	501.077	263.132	1207.87	289.999	1149.17	463.18	578.956	602.774	522.706	1765.64	816.371	1057.16
ENSG00000074603	DPP8	-0.339246	0.103629	0.34439	736.869	676.653	923.116	745.634	907.218	959.384	489.433	732.092	570.869	813.96	596.746	576.395	1021.8	661.452	809.295
ENSG00000074621	SLC24A1	0.204821	0.484498	0.75882	152.09	236.884	245.453	208.671	341.679	234.474	177.275	308.146	246.643	219.697	299.378	198.547	452.773	338.559	261.802
ENSG00000074657	ZNF532	-0.064611	0.834773	0.940496	900.749	746.841	1163.23	861.268	672.558	860.362	846.874	1888.13	1160.27	1011.15	621.861	1286.51	1135.43	792.872	693.824
ENSG00000074660	SCARF1	-0.851377	0.0861043	0.309035	89.6033	295.008	482.012	154.178	158.076	355.915	255.315	851.818	252.433	578.956	177.818	246.158	249.112	187.992	222.979
ENSG00000074695	LMAN1	0.63953	0.0365151	0.182297	1654.12	4232.1	1657.7	3273.61	2204.22	1446.08	3888.49	2290.49	1621.13	1760.28	2863.17	1712.98	2306.69	2503.94	1758.95
ENSG00000074696	HACD3	0.281316	0.479323	0.754985	5665.05	9458.89	4515.98	4635.96	9304.87	4257.91	2462.58	2373.9	4425.68	4366.03	7572.84	3009.61	5980.44	5205.45	3780.69
ENSG00000074706	IPCEF1	-0.65742	0.313356	0.623563	27.1168	112.958	302.369	136.899	233.677	272.775	80.9299	336.606	69.477	368.263	459.112	167.144	93.5264	525.68	148.321
ENSG00000074755	ZZEF1	-0.310437	0.29352	0.603061	1290.99	1290.8	3277.15	2484.12	1632.8	1989.76	2845.07	2038.28	2028.73	1635.12	1099.06	1905.45	1584.7	1720.65	2343.27
ENSG00000074771	NOX3	5.22284	0.0224931	0.133355	63.6655	1.09668	0	0	0.981837	0	0	2.94407	0	0.900399	0	114.469	2.62224	71.3672	1.99089
ENSG00000074800	ENO1	0.506789	0.144912	0.415605	14458	16126.7	6093.63	8025.21	7547.38	7201.45	19091.8	10458.3	8519.03	8805.9	8915.02	12008.1	6964.66	8457.01	5040.92
ENSG00000074803	SLC12A1	-1.94487	0.00886866	0.0703778	16.5059	10.9668	109.387	31.8988	3.92735	14.9466	7.70761	6.8695	10.4215	9.00399	5.02311	5.06498	7.86671	18.277	14.9316
ENSG00000074842	MYDGF	0.429802	0.149231	0.421613	3271.7	4451.44	2113.03	5873.37	4760.93	2260.67	2557.96	1929.35	3572.27	3195.52	3335.35	2733.06	2906.31	2779.84	2616.02
ENSG00000074855	ANO8	-0.504859	0.149296	0.421613	733.332	695.297	1106.32	300.38	258.223	442.792	569.4	548.579	390.229	550.144	312.438	621.98	571.647	447.35	468.854
ENSG00000074935	TUBE1	0.119209	0.77767	0.915558	267.631	478.154	219.662	164.81	150.221	322.286	88.6375	281.65	404.124	241.307	451.076	256.288	179.186	337.689	343.428
ENSG00000074964	ARHGEF10L	-0.274437	0.486742	0.759611	850.052	221.53	931.12	304.368	740.305	654.847	546.277	1148.19	647.294	668.096	547.519	337.328	697.515	654.489	758.528
ENSG00000075035	WSCD2	-1.66859	0.10281	0.342815	214.576	16.4502	528.257	0	29.4551	180.293	23.1228	196.271	33.5805	40.5179	97.4484	13.169	129.364	161.882	26.877
ENSG00000075043	KCNQ2	0.184866	0.809723	0.928635	1175.45	580.145	1177.46	91.709	412.372	117.704	79.003	149.166	580.133	358.359	1191.48	747.592	1300.63	955.624	254.833
ENSG00000075089	ACTR6	0.00446833	0.985376	0.993866	701.499	1169.06	732.801	1068.61	779.579	812.72	1011.62	560.355	668.137	898.598	967.451	974.503	614.477	675.377	618.17
ENSG00000075131	TIPIN	-0.369854	0.230212	0.53225	134.405	137.085	150.295	67.7849	125.675	155.071	83.8203	93.2289	126.216	147.665	95.4391	113.456	230.757	98.3475	94.5671
ENSG00000075142	SRI	0.158471	0.383978	0.682885	2361.52	2734.03	1836.45	2597.09	1999.02	1740.34	2461.62	1980.38	1723.03	2118.64	2059.48	2092.85	1447.47	1865.99	2108.35
ENSG00000075151	EIF4G3	0.777802	0.0253468	0.144146	4925.82	2305.23	3305.61	2874.88	5019.15	1859.91	4403.94	2443.58	5186.45	2076.32	4942.74	3114.96	7600.99	4224.59	2622
ENSG00000075188	NUP37	0.291018	0.418863	0.711014	193.354	352.035	155.631	501.077	351.498	250.355	253.388	169.775	150.533	191.785	198.915	187.404	180.06	178.418	211.034
ENSG00000075213	SEMA3A	-0.701748	0.243237	0.548126	529.367	89.928	233.892	429.305	61.8557	222.33	248.57	148.185	110.005	636.582	367.692	271.483	113.63	234.119	84.6127
ENSG00000075218	GTSE1	0.267714	0.63161	0.847839	73.0974	31.8038	62.2525	37.2153	27.4914	27.0907	87.6741	30.4221	25.4749	23.4104	105.485	27.3509	50.6965	30.4616	15.9271
ENSG00000075223	SEMA3C	-0.549828	0.624236	0.843372	4.71596	281.848	195.651	7.9747	12.7639	12.1441	31.7939	224.731	44.0021	69.3307	11.0508	12.156	13.1112	107.051	5.97266
ENSG00000075234	TTC38	-0.48902	0.109954	0.356397	622.507	230.303	547.822	297.722	491.9	519.394	327.573	471.051	701.717	882.391	523.408	427.485	512.21	557.012	393.2
ENSG00000075239	ACAT1	-0.139295	0.634566	0.849042	1336.98	1210.74	1545.64	930.382	2364.26	1754.35	2416.34	1213.94	1411.54	1809.8	2276.47	1439.47	1589.95	1282.87	1083.04
ENSG00000075240	GRAMD4	0.291336	0.377918	0.678363	1217.9	571.372	1046.73	1092.53	1346.1	697.818	584.815	809.62	1808.72	733.825	1087	936.009	1040.15	1061.8	577.357
ENSG00000075275	CELSR1	4.72177	1.00472e-07	8.19266e-06	2102.14	723.811	66.6991	62.4685	1663.23	44.8397	668.635	973.506	6248.29	127.857	2795.86	3317.56	3806.61	2842.5	64.7038
ENSG00000075292	ZNF638	-0.0364068	0.852312	0.94698	2606.75	2124.28	2744.45	3185.89	2279.83	2603.51	1760.23	1766.44	2853.19	2441.88	2831.03	3210.19	2675.55	2406.47	2685.71
ENSG00000075303	SLC25A40	0.380001	0.141284	0.409911	321.864	282.944	289.03	235.254	326.952	209.252	428.736	324.829	223.484	210.693	367.692	166.131	305.053	302.005	404.15
ENSG00000075336	TIMM21	-0.00202905	0.990091	0.995103	585.958	660.203	477.566	607.406	486.991	542.748	614.682	547.597	466.654	549.243	463.131	418.368	532.314	451.702	437
ENSG00000075340	ADD2	0.10856	0.892287	0.962368	1230.87	171.083	904.44	264.494	2595.98	703.423	224.484	245.339	362.438	377.267	1201.53	117.508	735.974	1292.44	118.458
ENSG00000075391	RASAL2	-0.00652259	0.981067	0.992952	517.577	386.032	704.343	584.811	662.74	531.538	835.312	759.57	474.759	631.18	988.549	420.394	599.618	725.856	477.813
ENSG00000075399	VPS9D1	-0.308494	0.514203	0.778326	1223.79	1354.4	2269.55	3787.98	980.855	1505.87	411.394	657.509	1681.34	1310.98	1206.55	1805.16	1176.51	1033.08	1112.91
ENSG00000075407	ZNF37A	0.151416	0.560603	0.807872	938.476	830.189	858.195	572.849	1592.54	933.227	722.589	678.118	900.885	789.65	944.345	1078.84	1261.3	984.345	959.607
ENSG00000075413	MARK3	0.0747323	0.792992	0.921836	1555.09	2221.88	2038.33	3624.5	1596.47	1803.87	2508.83	1825.32	1655.87	1567.59	1475.79	2063.47	1299.75	1469.99	1496.15
ENSG00000075415	SLC25A3	0.25181	0.412124	0.705956	7856.79	13170.1	7134.14	16885.1	9269.52	7551.76	7331.86	5159.98	6271.45	7326.54	8330.33	9577.88	6499.65	7307.3	7184.11
ENSG00000075420	FNDC3B	0.627158	0.059915	0.249622	721.542	1676.83	562.941	532.976	798.234	307.339	757.273	1131.5	581.291	724.821	750.453	642.24	737.722	721.505	803.323
ENSG00000075426	FOSL2	0.353901	0.453749	0.73731	4058.09	1217.32	4148.69	3877.03	3529.7	2092.52	3250.68	9791.98	3596.59	2485.1	4860.36	3969.93	1757.77	1808.55	2891.76
ENSG00000075429	CACNG5	6.87253	0.000106949	0.0024527	17.6849	0	0	1.32912	7.8547	0	31.7939	13.739	70.6349	0	32.1479	2.02599	15.7334	41.7759	0
ENSG00000075461	CACNG4	5.89287	3.0124e-10	5.33955e-08	980.92	52.6408	4.44661	30.5697	109.966	7.47329	413.321	232.582	243.169	2.7012	141.652	128.651	450.15	671.026	15.9271
ENSG00000075539	FRYL	0.212006	0.479639	0.755174	666.13	666.783	932.009	479.811	1156.6	962.186	1352.69	1268.89	845.303	798.654	1288.93	1027.18	1362.69	1033.95	1323.94
ENSG00000075568	TMEM131	0.323806	0.112575	0.361305	1162.48	1154.81	1422.03	1464.69	1430.54	1002.35	1227.44	1039.26	1281.85	925.61	1488.85	1964.2	1287.52	1571.82	1698.23
ENSG00000075618	FSCN1	-1.17051	0.00505906	0.047618	588.316	193.016	1009.38	300.38	166.912	419.438	281.328	1774.29	405.282	928.311	285.313	291.743	752.582	264.581	260.806
ENSG00000075624	ACTB	-0.358581	0.250733	0.557089	25896.5	16306.6	27752.2	25237.3	24304.4	32099.6	13856.4	48617.4	24710.6	32110	15253.2	20136.3	21046.9	21800.9	29728.9
ENSG00000075651	PLD1	1.2814	0.10178	0.340692	113.183	73.4778	54.2486	322.975	577.32	22.4199	33.7208	210.992	132.006	136.861	75.3467	47.6108	41.0817	368.15	80.6309
ENSG00000075702	WDR62	0.883965	0.146797	0.418712	122.615	106.378	155.631	138.228	108.002	27.0907	195.581	142.297	125.059	17.1076	196.906	61.7928	187.927	67.0155	23.8906
ENSG00000075711	DLG1	-0.781746	0.0139682	0.0967567	1427.76	530.795	2919.64	632.66	1611.19	2071.04	1528.03	1363.11	1366.38	1977.28	1688.77	1339.18	1624.04	1495.23	1602.66
ENSG00000075785	RAB7A	-0.394806	0.00419191	0.0415163	6259.26	4887.92	7025.64	5134.38	6348.56	8053.4	6421.4	5588.83	4388.63	7255.41	6074.95	4993.06	6649.11	5614.51	5584.44
ENSG00000075790	BCAP29	0.53723	0.159616	0.437195	707.394	1757.98	667.881	1995	744.233	644.571	1226.47	1246.32	824.46	742.829	684.148	843.826	628.462	766.762	507.676
ENSG00000075826	SEC31B	0.0970844	0.844495	0.943879	840.62	348.745	982.7	1225.45	340.697	398.887	211.959	300.295	1034.05	494.319	489.251	1072.76	616.225	583.122	964.584
ENSG00000075856	SART3	0.0189226	0.938105	0.977749	1858.09	2628.75	2700.87	3866.4	2091.31	2309.25	2599.39	1597.65	1929.14	1907.95	2117.74	3037.98	2130.13	1965.21	2218.84
ENSG00000075884	ARHGAP15	-0.47936	0.564074	0.809411	5.89495	16.4502	15.1185	13.2912	9.81837	18.6832	2.89035	80.4713	35.8964	42.3187	12.0555	3.03899	12.2371	10.444	15.9271
ENSG00000075914	EXOSC7	0.301483	0.126013	0.385527	1233.22	1167.97	801.279	1055.32	1066.28	929.49	808.336	635.919	830.25	773.443	1094.03	1297.65	1083.86	1004.36	1068.11
ENSG00000075945	KIFAP3	-0.347971	0.125429	0.384653	2242.44	1682.31	2178.84	1342.41	1955.82	2060.76	1976.04	1186.46	1608.39	2637.27	2459.32	1313.86	1587.33	2130.57	2126.27
ENSG00000075975	MKRN2	-0.177286	0.538882	0.794972	885.422	846.639	1191.69	591.457	916.054	898.663	1476.01	816.489	611.397	617.674	724.333	599.694	810.271	758.059	542.517
ENSG00000076003	MCM6	0.234917	0.577925	0.817919	383.172	293.911	389.523	260.507	561.611	143.861	277.474	363.102	208.431	263.817	287.322	183.352	594.373	195.825	143.344
ENSG00000076043	REXO2	1.7817	0.000113659	0.00256931	1424.22	456.22	219.662	671.204	810.997	187.766	710.064	1000	1727.66	339.45	1266.83	776.968	518.329	691.914	218.998
ENSG00000076053	RBM7	0.38295	0.148962	0.421381	190.996	194.113	119.169	311.013	253.314	208.318	277.474	403.338	213.063	246.709	238.096	263.379	196.668	218.453	234.925
ENSG00000076067	RBMS2	-0.600793	0.309606	0.619801	67.2025	112.958	212.548	167.469	116.839	189.635	54.9167	621.199	247.801	403.379	102.471	147.898	88.2819	226.286	171.216
ENSG00000076108	BAZ2A	0.0298978	0.906718	0.966533	2109.21	3099.23	3947.7	3361.34	2555.72	3138.78	5406.89	3297.36	3239.94	2833.55	2460.32	4581.78	2957.88	3632.76	3807.57
ENSG00000076201	PTPN23	-0.29707	0.186818	0.475667	1730.76	1196.48	3074.38	2286.08	2204.22	2407.33	2971.28	1663.4	2174.63	2025.9	2055.46	1910.51	2049.71	1866.86	2332.32
ENSG00000076242	MLH1	0.17302	0.449758	0.734532	1102.36	1752.5	1148.11	915.761	1411.88	943.503	1334.38	862.613	911.306	934.614	1359.25	888.398	1180.88	973.901	953.635
ENSG00000076248	UNG	-0.478566	0.112774	0.361694	294.748	527.505	609.185	247.216	756.015	696.884	549.167	509.324	369.386	575.355	438.015	316.055	605.736	339.429	445.959
ENSG00000076258	FMO4	1.41451	0.246843	0.552714	8.25293	3.29005	3.55729	3.98735	191.458	11.2099	15.4152	141.315	164.429	54.9243	161.744	2.02599	7.86671	38.2946	4.97722
ENSG00000076321	KLHL20	-0.191741	0.508113	0.775465	235.798	244.56	375.294	288.418	276.878	421.307	482.689	574.094	291.803	324.144	291.341	227.924	250.861	370.761	388.223
ENSG00000076344	RGS11	0.827861	0.091022	0.318863	3719.72	1801.85	2934.76	1794.31	5129.12	1888.87	1480.82	1965.66	6295.77	717.618	3097.25	5002.18	4297.84	3308.13	1451.36
ENSG00000076351	SLC46A1	0.717747	0.0290416	0.157914	636.655	516.538	419.76	523.672	538.047	514.723	1597.4	670.267	650.768	343.952	762.508	474.082	743.841	759.799	534.553
ENSG00000076356	PLXNA2	0.994175	0.188305	0.477587	193.354	151.342	82.7069	55.8229	78.547	42.9714	252.424	1055.94	233.906	226	73.3374	86.1047	180.06	340.3	100.54
ENSG00000076382	SPAG5	-0.0931688	0.811837	0.929432	274.705	256.624	405.531	127.595	160.039	359.652	565.546	261.041	203.799	188.183	312.438	285.665	444.906	271.543	409.127
ENSG00000076513	ANKRD13A	-0.657729	0.0325247	0.169935	301.822	463.897	631.418	336.267	360.334	827.667	764.98	767.421	411.072	719.419	335.544	501.433	439.661	301.135	538.535
ENSG00000076554	TPD52	0.238516	0.475118	0.751559	3690.24	4494.21	2603.04	4068.43	3571.92	2770.72	2652.38	1431.8	2210.53	3152.3	3715.09	6252.22	2533.08	2822.49	2794.21
ENSG00000076555	ACACB	-0.467978	0.258773	0.565881	521.114	461.704	1469.16	1755.76	645.067	1759.03	985.611	2146.23	950.676	1248.85	893.109	1288.53	729.856	958.235	1611.62
ENSG00000076604	TRAF4	-0.451502	0.556731	0.805612	287.674	336.682	670.548	120.95	122.73	914.544	2108.99	1169.78	433.073	501.522	79.3652	316.055	221.142	230.638	675.906
ENSG00000076641	PAG1	0.676243	0.311326	0.621675	305.359	81.1546	160.078	396.077	650.958	225.133	89.601	198.234	186.43	68.4303	209.966	73.9488	243.868	429.073	34.8405
ENSG00000076650	GPATCH1	-0.354213	0.149852	0.422195	240.514	388.226	419.76	497.09	219.932	406.36	439.334	312.072	277.908	384.47	255.174	267.431	309.424	255.877	327.501
ENSG00000076685	NT5C2	-0.247618	0.328726	0.638522	742.764	830.189	1378.45	736.331	741.287	873.441	591.559	662.416	702.875	807.658	1299.98	839.774	1022.67	1041.79	1094.99
ENSG00000076706	MCAM	0.127727	0.885373	0.960209	240.514	246.754	870.646	224.621	213.059	253.158	741.858	5868.52	1857.35	2202.38	552.542	295.795	1395.03	1502.19	1397.6
ENSG00000076716	GPC4	-0.253655	NA	NA	17.6849	32.9005	46.2447	13.2912	32.4006	50.4447	63.5878	709.521	103.057	247.61	9.0416	29.3769	41.9558	52.2199	5003.1
ENSG00000076770	MBNL3	0.0323334	0.944481	0.97971	689.709	198.5	742.584	971.584	987.728	709.028	247.607	343.475	655.399	664.494	816.758	829.644	748.211	1487.4	679.888
ENSG00000076826	CAMSAP3	-0.349718	0.595366	0.827622	1470.2	1072.56	4289.2	517.026	1009.33	230.738	1597.4	706.577	2200.1	385.371	2013.26	1606.61	1166.89	1655.37	382.25
ENSG00000076864	RAP1GAP	0.539545	0.338942	0.64737	1763.77	556.018	598.513	251.203	1411.88	1187.32	470.164	495.585	1391.86	863.482	1653.61	956.269	2847.75	2194.11	1409.55
ENSG00000076924	XAB2	0.485669	0.0633537	0.258453	2372.13	2725.26	2252.65	5341.72	2316.15	1735.67	3091.72	2227.68	3007.19	1880.93	2629.1	2597.32	2060.2	2400.37	2109.34
ENSG00000076928	ARHGEF1	0.182306	0.571772	0.814131	2020.79	2073.83	2310.46	2549.25	1036.82	1290.08	1340.16	2370.96	2629.7	1442.44	2101.67	2719.9	1634.53	1210.63	1203.49
ENSG00000076944	STXBP2	1.96728	0.00167501	0.0205354	226.366	324.618	211.659	97.0255	756.015	66.3254	1175.41	728.167	902.043	128.757	558.57	513.589	443.158	554.401	82.6218
ENSG00000076984	MAP2K7	-0.168618	0.303568	0.613802	1787.35	2105.63	2225.08	2244.88	1364.75	1901.95	2143.68	1788.03	2171.15	2306.82	1444.65	2114.12	1847.8	1991.32	1896.32
ENSG00000077044	DGKD	0.720526	0.0520514	0.229607	719.184	182.049	398.416	283.102	466.373	278.38	435.48	560.355	694.77	249.41	442.034	412.29	767.441	741.522	399.173
ENSG00000077063	CTTNBP2	3.0882	1.3694e-05	0.000490965	378.456	1699.86	64.0312	414.684	162.003	13.0783	102.126	176.644	151.691	63.9283	238.096	194.495	347.009	373.372	561.43
ENSG00000077080	ACTL6B	0.114401	0.69601	0.878794	1562.16	1478.33	1217.48	854.622	1047.62	940.7	1051.13	500.492	1368.7	867.984	979.507	1013	1277.9	1261.11	709.751
ENSG00000077092	RARB	0.267539	0.672292	0.867921	213.397	65.801	266.796	253.861	695.141	140.124	107.907	469.089	176.008	282.725	411.895	131.69	249.112	493.478	52.7585
ENSG00000077097	TOP2B	0.0610939	0.773448	0.91494	3658.41	2591.46	3254.03	1719.88	3235.15	2710	3665.93	3116.79	2703.81	2960.51	4160.14	2763.45	3076.76	3131.45	3416.36
ENSG00000077147	TM9SF3	-0.127419	0.460975	0.741946	2264.84	3421.65	3385.65	3213.8	3135.99	2704.4	2927.93	3352.32	2496.54	2990.22	2768.74	2105.01	2320.68	2386.45	2858.91
ENSG00000077150	NFKB2	-0.302385	0.652016	0.857982	314.79	194.113	212.548	81.0761	119.784	212.989	44.3188	932.289	353.175	535.737	241.109	100.287	136.356	302.875	297.638
ENSG00000077152	UBE2T	0.794745	0.0673066	0.267043	181.565	203.983	144.07	142.215	170.84	49.5105	233.155	107.949	91.478	54.0239	204.943	70.9098	145.097	99.2178	67.6901
ENSG00000077157	PPP1R12B	0.609716	0.042438	0.201839	960.877	937.664	710.568	750.951	761.906	502.579	587.705	1976.45	723.718	608.67	998.595	865.099	908.168	738.911	909.835
ENSG00000077232	DNAJC10	-0.0811825	0.800503	0.92502	1700.1	1853.39	1928.05	2377.79	2799.22	2301.77	1310.29	2079.5	2328.64	3060.46	2608	1759.58	1716.69	2241.1	4791.07
ENSG00000077235	GTF3C1	-0.0132837	0.967664	0.988352	3779.84	2804.22	3665.78	6374.44	4695.15	4058	1755.41	2089.31	3822.39	3643.91	3657.83	2540.6	4931.55	3960.88	4643.74
ENSG00000077238	IL4R	-1.8489	NA	NA	17.6849	52.6408	64.9205	58.4811	30.437	56.9838	25.0497	1144.26	115.795	424.088	31.1433	25.3249	67.304	74.8485	53.7539
ENSG00000077254	USP33	-0.204259	0.102562	0.342342	1270.95	1221.71	1582.1	1019.43	1332.35	1374.15	1270.79	1056.92	1022.47	1261.46	1391.4	1278.4	1288.39	1201.93	1285.12
ENSG00000077264	PAK3	-0.769936	0.0976295	0.331965	2870.84	1810.62	4592.46	2473.49	2368.19	3507.78	1031.86	661.435	1251.74	2404.97	1961.02	1383.75	1221.09	2749.38	4859.75
ENSG00000077279	DCX	-1.36636	0.147024	0.419171	266.452	111.862	442.882	275.127	12.7639	410.097	321.793	123.651	25.4749	169.275	17.0786	156.001	3.49631	20.0176	252.843
ENSG00000077312	SNRPA	0.100022	0.531435	0.790275	874.811	755.615	673.216	898.483	1037.8	783.761	704.283	780.179	1013.21	861.682	841.874	828.631	826.878	758.929	622.152
ENSG00000077327	SPAG6	-0.528375	0.517567	0.78063	449.195	155.729	651.873	297.722	533.138	667.925	23.1228	157.017	383.281	593.363	548.524	1370.58	20.1038	417.759	949.653
ENSG00000077348	EXOSC5	0.660924	0.0647809	0.261579	636.655	403.579	201.876	354.874	400.59	281.183	630.097	373.897	270.96	228.701	266.225	330.237	323.409	378.594	132.394
ENSG00000077380	DYNC1I2	-0.443477	0.0654255	0.26295	1638.8	1595.67	1647.02	1415.51	1615.12	2003.78	853.618	1943.09	1695.24	2730.01	2159.94	1157.86	1576.84	1450.84	1666.37
ENSG00000077420	APBB1IP	-0.79378	0.335041	0.644331	33.0117	89.928	55.1379	101.013	29.4551	136.388	11.5614	345.438	57.8975	171.076	28.1294	17.2209	34.0891	17.4066	71.6719
ENSG00000077454	LRCH4	-0.665724	0.0798272	0.295127	733.332	849.929	2169.06	2175.76	730.487	1309.69	756.309	580.963	1025.94	1201.13	803.698	893.463	666.048	880.775	1706.19
ENSG00000077458	FAM76B	0.0544274	0.840271	0.942211	180.386	167.793	272.132	192.722	237.605	237.277	335.281	403.338	296.435	240.406	177.818	315.042	270.964	243.693	291.665
ENSG00000077463	SIRT6	0.0415409	0.902678	0.965496	748.659	1256.8	976.475	2206.33	811.979	1010.76	943.219	699.708	829.092	828.367	714.287	1221.67	754.33	704.969	703.778
ENSG00000077514	POLD3	0.120053	0.445241	0.731136	300.643	257.721	265.907	221.962	280.805	229.804	341.062	286.556	226.958	280.924	265.22	287.691	347.009	268.062	288.679
ENSG00000077522	ACTN2	-0.0291717	0.976385	0.991323	140.3	9.87015	86.2642	9.30382	31.4188	1.86832	29.867	28.4594	98.4257	36.016	39.1803	3.03899	55.0669	39.1649	2.98633
ENSG00000077549	CAPZB	-0.349066	0.0572755	0.243216	3970.84	2761.45	3710.25	3954.12	3583.71	4762.35	3134.11	4461.25	2541.7	4716.29	3371.51	3905.1	2855.61	2998.29	3881.23
ENSG00000077585	GPR137B	0.998694	0.143675	0.41337	179.207	206.176	13.3398	11.962	185.567	81.272	115.614	240.433	167.903	121.554	168.777	52.6758	197.542	165.363	35.836
ENSG00000077616	NAALAD2	0.829093	0.262461	0.570134	664.951	1180.03	586.063	948.989	162.985	41.1031	446.078	410.207	257.065	556.446	1036.77	75.9747	492.106	1295.92	1440.41
ENSG00000077684	JADE1	-0.667236	0.00285414	0.0309855	1220.26	967.275	1756.41	723.039	940.6	2304.58	1072.32	1026.5	1111.63	1228.14	1157.33	1556.98	1373.18	1060.93	1109.92
ENSG00000077713	SLC25A43	-1.17784	0.161539	0.439878	66.0235	26.3204	23.1224	17.2785	8.83653	87.8112	50.0995	229.638	30.1067	218.797	25.1156	10.13	64.6818	37.4243	16.9225
ENSG00000077721	UBE2A	-0.491113	0.0705888	0.27432	892.496	1036.37	1400.68	1847.47	862.053	1340.52	1110.86	908.737	664.663	1203.83	889.091	744.553	732.478	711.061	831.195
ENSG00000077782	FGFR1	-0.447404	0.629741	0.847035	865.379	1305.05	657.209	1117.79	221.895	3901.06	518.337	12058.9	525.709	3236.93	984.53	400.134	738.596	818.112	3311.84
ENSG00000077935	SMC1B	-1.22529	0.0685206	0.269507	4.71596	10.9668	54.2486	31.8988	14.7276	24.2882	25.0497	21.5899	4.6318	17.1076	4.01849	15.1949	20.1038	6.09232	4.97722
ENSG00000077942	FBLN1	-3.27921	NA	NA	235.798	58.1242	61.3632	78.4179	52.0374	78.4695	147.408	10016.7	2224.42	9619.86	136.629	25.3249	544.551	167.974	171.216
ENSG00000077943	ITGA8	-0.613162	NA	NA	11.7899	10.9668	12.4505	11.962	1.96367	7.47329	13.4883	958.786	211.905	162.972	39.1803	6.07798	69.0522	20.888	54.7494
ENSG00000077984	CST7	0.104176	0.915564	0.969603	7.07394	15.3536	5.33593	3.98735	3.92735	2.80248	3.85381	60.8441	30.1067	27.9124	2.00925	8.10397	9.61486	5.22199	4.97722
ENSG00000078018	MAP2	-0.349501	0.428078	0.719042	4521.43	2123.18	3526.16	2094.69	2585.18	3533	666.708	998.04	2242.95	3265.75	4370.11	2413.97	3348.59	3313.35	3735.9
ENSG00000078043	PIAS2	-0.230295	0.314008	0.624394	519.935	357.519	723.908	707.09	741.287	746.395	859.399	537.784	530.341	580.757	637.935	522.706	459.765	552.661	567.403
ENSG00000078053	AMPH	-0.157029	0.726634	0.892726	1688.31	222.627	1607	1438.1	1919.49	1790.79	1401.82	583.908	983.099	1044.46	1235.69	1716.02	1765.64	1308.98	1672.34
ENSG00000078061	ARAF	0.0572557	0.880314	0.957859	947.908	1124.1	1398.9	4303.68	1651.45	1610.49	1511.66	1441.61	1337.43	1558.59	1198.51	1068.71	1222.84	1473.47	1733.07
ENSG00000078070	MCCC1	0.540959	0.0913536	0.319414	804.072	652.526	619.857	683.166	1050.57	804.313	2091.65	834.154	1265.64	605.068	1080.97	815.462	963.234	901.663	664.956
ENSG00000078081	LAMP3	0.456355	0.439556	0.726186	17.6849	3.29005	17.7864	19.9367	34.3643	10.2758	44.3188	20.6085	16.2113	14.4064	14.0647	7.09098	25.3483	13.9253	15.9271
ENSG00000078098	FAP	-2.8063	NA	NA	4.71596	5.48342	3.55729	6.64558	1.96367	3.73664	6.74416	172.719	33.5805	153.068	8.03698	0	11.363	2.61099	4.97722
ENSG00000078114	NEBL	1.05442	0.00150217	0.0189052	4666.44	3118.97	2683.97	2527.98	5105.55	1415.25	4261.35	2050.06	3229.52	1354.2	5110.51	3902.06	5520.68	3701.52	2109.34
ENSG00000078124	ACER3	-0.742893	0.0242268	0.139478	277.063	131.602	497.131	321.646	328.915	530.604	364.185	426.89	204.957	341.251	289.331	163.092	180.06	235.86	348.405
ENSG00000078140	UBE2K	-0.268983	0.166699	0.446555	1586.92	1594.58	2247.32	1341.08	1926.36	2046.75	2413.45	1601.57	1239.01	1812.5	1735.99	2105.01	1361.81	1651.02	1712.16
ENSG00000078142	PIK3C3	0.214213	0.316934	0.627646	662.593	678.847	722.129	939.685	724.596	688.477	1048.24	962.711	648.452	567.251	470.163	836.735	743.841	764.151	697.806
ENSG00000078177	N4BP2	0.340467	0.210974	0.508315	285.316	251.14	264.129	148.861	264.114	280.248	309.268	294.407	273.276	184.582	377.738	446.732	375.854	274.154	388.223
ENSG00000078237	TIGAR	1.07799	0.0152877	0.102901	1232.05	1171.26	658.987	1491.27	1828.18	634.295	2562.78	843.967	752.667	312.438	912.197	721.254	660.803	959.105	424.059
ENSG00000078246	TULP3	-0.0740141	0.773927	0.91494	275.884	398.096	544.265	588.799	693.177	478.291	486.543	708.54	512.972	511.427	411.895	444.706	333.898	483.034	491.749
ENSG00000078269	SYNJ2	2.12064	0.00670033	0.0580797	479.849	71.2844	45.3554	37.2153	153.167	12.1441	186.91	543.672	302.225	144.964	445.048	113.456	492.98	635.342	60.722
ENSG00000078295	ADCY2	1.12859	0.0162083	0.107222	4212.53	2172.53	1058.29	2111.97	1709.38	1715.12	1856.57	972.525	3461.11	946.319	2267.43	6292.74	3766.4	2648.42	1060.15
ENSG00000078304	PPP2R5C	0.0498929	0.851373	0.946573	2006.64	3636.6	1840.9	1767.73	2297.5	2059.83	3313.31	2295.39	1381.43	2434.68	1695.8	1957.11	1990.28	2116.65	1773.88
ENSG00000078319	PMS2P1	0.911815	0.000662688	0.0101523	516.398	727.101	288.14	737.66	639.176	306.405	522.191	305.202	314.962	248.51	548.524	433.563	584.758	586.603	429.036
ENSG00000078328	RBFOX1	-4.94328	NA	NA	33.0117	7.67678	1022.72	2.65823	6.87286	0.934161	1.9269	8.83221	6.9477	5.40239	180.832	3.03899	6.99263	42.6462	3.98177
ENSG00000078369	GNB1	-0.102943	0.680947	0.871884	9450.79	8472.97	10346.4	4394.06	9942.08	8321.51	12166.5	8407.29	6501.89	8994.08	9055.67	6538.89	9436.55	7638.9	11019.6
ENSG00000078401	EDN1	0.483253	0.608259	0.83529	23.5798	4.38673	13.3398	35.8861	3.92735	7.47329	15.4152	130.521	68.319	46.8207	12.0555	13.169	16.6075	50.4792	3.98177
ENSG00000078403	MLLT10	-0.372002	0.0583	0.245715	503.429	418.933	878.65	668.546	667.649	728.646	467.274	597.647	492.128	711.315	802.693	696.942	550.669	623.157	676.901
ENSG00000078487	ZCWPW1	0.526952	0.168526	0.449355	112.004	157.922	88.0428	196.709	112.911	127.98	136.81	174.682	262.854	126.956	336.549	178.287	107.512	114.884	86.6036
ENSG00000078549	ADCYAP1R1	3.37868	1.35719e-05	0.000487509	568.273	263.204	48.0234	156.836	61.8557	40.1689	382.49	190.383	79.8985	27.012	172.795	165.118	242.12	809.408	1700.22
ENSG00000078596	ITM2A	-0.271514	0.775454	0.91511	24.7588	17.5469	163.635	38.5444	69.7104	37.3664	15.4152	765.459	266.328	318.741	80.3698	41.5329	100.519	115.754	186.148
ENSG00000078618	NRDC	1.11471	7.07856e-07	4.22176e-05	4173.63	5972.54	2034.77	4071.08	5575.85	1939.32	5660.28	2984.31	4148.93	2037.6	4615.24	4333.6	3719.2	4080.98	2738.46
ENSG00000078668	VDAC3	-0.11995	0.737754	0.898494	3825.82	4950.43	2826.26	2267.47	1167.4	3130.37	2169.69	1670.27	1873.56	2603.95	2527.63	4169.49	2309.32	2283.75	2296.49
ENSG00000078674	PCM1	-0.0656916	0.817303	0.932726	2754.12	4649.94	3577.74	2913.42	1572.9	3737.58	3221.78	2623.17	2795.29	3250.44	3987.35	5547.17	3380.06	3554.43	3381.52
ENSG00000078687	TNRC6C	0.417797	0.0770402	0.28929	943.192	1080.23	820.844	842.66	778.597	862.231	1457.7	1238.47	851.093	645.586	761.504	877.255	1125.81	955.624	1529
ENSG00000078699	CBFA2T2	0.154098	0.596484	0.828057	896.033	742.454	1340.21	915.761	810.997	966.857	1787.2	1046.13	1763.56	830.168	1180.43	1611.68	1186.12	1024.38	998.43
ENSG00000078725	BRINP1	3.11559	0.000649994	0.0100226	232.261	156.826	4.44661	7.9747	3.92735	2.80248	25.0497	44.1611	42.8441	26.1116	104.481	81.0397	188.801	146.216	123.435
ENSG00000078747	ITCH	-0.0123867	0.952869	0.982394	430.332	929.987	596.735	580.824	584.193	500.71	653.22	595.684	492.128	625.777	550.533	526.758	485.114	471.72	534.553
ENSG00000078795	PKD2L2	0.219938	0.744744	0.901431	22.4008	15.3536	9.78254	74.4305	42.219	56.0497	83.8203	38.2729	6.9477	35.1156	87.4022	25.3249	25.3483	28.7209	19.9089
ENSG00000078804	TP53INP2	-0.471232	0.337116	0.646244	1270.95	607.562	1537.64	2748.61	567.502	1587.14	1740.96	1151.13	684.348	1647.73	659.032	461.926	742.967	939.088	2197.94
ENSG00000078808	SDF4	0.0264362	0.879778	0.95773	5412.75	4387.83	5812.61	4557.54	5253.81	4186.91	5189.15	5122.68	6811.06	5438.41	6721.93	4912.02	4492.76	4209.79	5824.34
ENSG00000078814	MYH7B	0.286827	0.484515	0.75882	121.436	71.2844	133.398	97.0255	87.3835	81.272	65.5147	123.651	275.592	117.052	172.795	202.599	188.801	103.569	109.499
ENSG00000078900	TP73	3.45084	5.61462e-06	0.000227536	75.4554	137.085	16.0078	6.64558	73.6378	6.53913	202.325	102.061	97.2677	1.8008	71.3282	99.2737	144.223	38.2946	17.918
ENSG00000078902	TOLLIP	-0.158984	0.448913	0.733944	3832.9	4090.63	3927.24	2651.59	5238.1	5406.92	5216.13	2936.22	3532.9	4018.48	4130	4701.32	4106.42	3559.66	3838.43
ENSG00000078967	UBE2D4	-0.251895	0.496873	0.767358	301.822	232.497	297.033	611.394	234.659	462.41	493.287	397.45	243.169	325.044	154.712	294.782	200.164	214.102	266.779
ENSG00000079101	CLUL1	-0.988452	0.0887984	0.315621	199.249	246.754	302.369	41.2026	236.623	172.82	54.9167	56.9187	114.637	360.16	164.758	96.2347	110.134	45.2572	317.546
ENSG00000079102	RUNX1T1	-0.794542	0.0870958	0.311495	555.305	696.394	671.438	198.038	375.062	767.88	454.749	532.877	90.32	787.849	346.595	717.202	465.884	191.473	511.658
ENSG00000079112	CDH17	-0.388581	0.709381	0.883234	1.17899	217.143	10.6719	1.32912	1.96367	0	1.9269	4.90679	4.6318	0.900399	2.00925	1.013	3.49631	1.74066	8.95899
ENSG00000079134	THOC1	-0.147216	0.555174	0.80462	417.363	312.555	626.082	586.14	485.028	505.381	566.509	605.497	631.082	485.315	341.572	615.902	340.891	393.39	545.503
ENSG00000079150	FKBP7	0.0515616	0.935236	0.976637	162.701	187.533	63.1418	53.1647	90.329	85.0087	45.2822	473.014	123.901	244.908	67.3097	91.1697	55.941	108.791	170.221
ENSG00000079156	OSBPL6	-1.06955	0.00789678	0.0648356	924.329	443.06	1764.41	793.483	1130.09	1798.26	281.328	305.202	525.709	1025.55	1186.46	828.631	785.797	660.582	879.972
ENSG00000079215	SLC1A3	-0.806525	0.466835	0.745794	70.7394	6.5801	350.393	919.749	25.5278	107.429	94.4182	241.414	30.1067	203.49	13.0601	35.4549	18.3556	36.5539	21.8998
ENSG00000079246	XRCC5	-0.0157266	0.911952	0.968186	4463.66	4931.78	4475.96	3342.73	5015.22	4515.74	3933.77	3536.81	4253.15	4181.45	4929.68	3860.53	4393.99	4568.37	4888.62
ENSG00000079257	LXN	-1.05337	0.025896	0.146184	78.9924	141.472	297.033	143.545	216.986	222.33	30.8304	259.078	96.1098	343.052	168.777	80.0267	96.1486	120.106	229.947
ENSG00000079263	SP140	-0.927912	0.275293	0.584629	1.17899	4.38673	21.3437	3.98735	4.90919	12.1441	4.81726	28.4594	5.78975	16.2072	2.00925	3.03899	5.24447	26.9803	12.9408
ENSG00000079277	MKNK1	0.574294	0.0152963	0.102912	372.561	405.773	409.977	559.558	827.689	417.57	459.566	760.552	713.297	332.247	563.593	621.98	549.795	561.364	510.662
ENSG00000079308	TNS1	0.636573	0.441095	0.727525	425.616	153.536	449.997	146.203	1393.23	737.987	195.581	4083.43	1981.25	1411.83	1398.43	267.431	2130.13	2274.18	1717.14
ENSG00000079313	REXO1	0.076715	0.790791	0.921403	888.959	1368.66	1214.81	2093.36	802.161	862.231	922.023	989.208	1101.21	893.196	775.569	1064.66	810.271	865.11	853.095
ENSG00000079332	SAR1A	0.259281	0.288798	0.598032	1412.43	1707.54	1261.06	2541.27	2058.91	1276.06	1093.52	1591.76	1500.7	1399.22	1487.85	1434.4	1491.18	1590.97	937.708
ENSG00000079335	CDC14A	-0.147583	0.76276	0.910433	63.6655	27.4171	122.726	166.14	56.9466	88.7453	88.6375	149.166	59.0554	99.0439	83.3837	67.8708	90.0301	57.4419	212.029
ENSG00000079337	RAPGEF3	2.07453	0.00250598	0.0281901	308.896	575.759	61.3632	705.761	149.239	68.1938	117.541	1327.78	270.96	152.167	92.4253	614.889	230.757	201.047	152.303
ENSG00000079385	CEACAM1	-0.0820113	0.923173	0.972231	14.1479	3.29005	52.47	5.31647	12.7639	8.40745	35.6477	57.9001	31.2646	22.51	11.0508	8.10397	7.86671	70.4969	56.7403
ENSG00000079387	SENP1	0.271794	0.358661	0.66239	278.242	441.963	353.061	785.508	310.261	333.496	416.211	274.78	286.013	277.323	302.391	453.822	379.35	350.744	378.268
ENSG00000079432	CIC	-0.71083	0.00942602	0.0735998	4262.05	4177.27	9955.07	6173.75	3237.12	5446.16	2619.62	2747.8	4324.94	5538.35	4918.63	5358.75	3712.21	4881.69	4762.2
ENSG00000079435	LIPE	0.112235	0.689823	0.876342	374.919	243.464	358.397	236.583	241.532	305.471	467.274	430.816	327.7	189.984	270.243	203.612	293.69	248.044	353.382
ENSG00000079459	FDFT1	0.352719	0.345993	0.652744	2138.69	3864.71	1165.01	1504.56	942.564	1674.02	2673.58	1611.39	1815.66	2386.96	2300.59	3844.32	1512.16	1946.93	2538.38
ENSG00000079462	PAFAH1B3	-1.12658	0.00250884	0.0282028	912.539	905.86	1212.15	688.482	467.354	1132.2	435.48	246.321	254.749	1040.86	382.761	448.758	590.877	358.577	511.658
ENSG00000079482	OPHN1	-0.205034	0.711498	0.884812	226.366	93.2181	569.166	591.457	319.097	345.64	3634.14	1040.24	370.544	306.136	260.197	95.2217	267.468	345.522	286.688
ENSG00000079616	KIF22	-0.192997	0.655271	0.859228	892.496	1461.88	1429.14	3176.59	1043.69	1602.09	706.21	602.553	981.941	818.462	919.23	934.996	1048.02	624.898	1081.05
ENSG00000079689	SCGN	-1.83965	0.178488	0.464363	21.2218	30.7071	2445.63	6026.21	238.586	4315.82	363.221	106.968	57.8975	639.283	49.2265	38.4939	29.7187	1285.48	23.8906
ENSG00000079691	CARMIL1	-0.289479	0.534563	0.792071	226.366	498.991	475.787	509.052	173.785	182.161	183.056	263.985	142.428	247.61	97.4484	164.105	237.749	308.097	160.266
ENSG00000079739	PGM1	0.114713	0.665188	0.864643	1604.61	1346.73	1584.77	1279.94	2049.09	1362.94	2534.84	1532.88	1564.39	1365.9	1935.91	828.631	1245.56	1448.23	1311
ENSG00000079785	DDX1	-0.00328748	0.98999	0.995103	3136.11	3229.73	3034.37	3309.5	3062.35	2544.66	1266.94	1818.45	2508.12	2742.61	3856.75	2651.01	2672.93	2973.92	2726.52
ENSG00000079805	DNM2	-0.126904	0.655528	0.859267	4014.46	3568.61	5171.41	8071.73	3682.87	3791.76	3767.09	3224.74	3604.7	3556.58	2698.42	3087.61	3055.78	3365.57	3724.95
ENSG00000079819	EPB41L2	-2.17661	0.005186	0.0483593	306.538	295.008	3419.44	172.785	181.64	2110.27	495.214	3557.42	903.2	2970.42	263.211	183.352	345.261	412.537	404.15
ENSG00000079841	RIMS1	-0.641265	0.151919	0.425596	555.305	512.151	661.655	507.723	164.949	457.739	207.142	135.427	277.908	346.654	240.105	230.963	154.712	282.858	492.744
ENSG00000079931	MOXD1	1.55405	0.263033	0.570689	30.6538	89.928	16.0078	11.962	3.92735	0	67.4416	160.943	27.7908	47.7211	0	26.3379	1.74816	4.35166	323.519
ENSG00000079950	STX7	-0.100992	0.776229	0.91511	1186.06	1443.24	1015.61	481.14	547.865	812.72	527.008	1154.08	665.821	714.917	905.165	547.018	492.106	912.978	623.147
ENSG00000079974	RABL2B	-0.164793	0.564949	0.810256	524.651	329.005	650.983	825.381	772.706	687.543	427.772	490.679	852.251	623.076	401.849	783.046	465.01	559.623	569.394
ENSG00000079999	KEAP1	-0.0287369	0.86179	0.95157	2850.8	2684.68	2429.63	2351.21	2253.32	2636.2	3676.53	2164.87	2055.36	2635.47	2471.37	2507.17	2576.78	2441.28	2163.1
ENSG00000080031	PTPRH	0.150091	0.845373	0.944195	502.25	128.312	315.709	154.178	92.2927	208.318	133.92	84.3967	458.548	207.992	157.726	48.6238	990.331	454.313	43.7995
ENSG00000080166	DCT	0.802878	0.339559	0.648026	73.0974	55.9308	40.0195	110.317	21.6004	39.2348	30.8304	11.7763	74.1088	44.1195	132.61	258.314	3.49631	14.7956	74.6582
ENSG00000080189	SLC35C2	0.335519	0.180203	0.466711	832.367	1166.87	849.302	1468.67	815.907	774.42	1238.03	1262.03	1234.37	806.757	585.695	897.515	755.204	880.775	1132.81
ENSG00000080200	CRYBG3	2.6708	0.00274207	0.0300888	7.07394	368.486	17.7864	866.584	133.53	57.918	1357.5	586.852	60.2134	117.952	245.128	137.768	444.032	174.937	550.48
ENSG00000080224	EPHA6	-3.39621	0.0485045	0.219608	0	4.38673	2.66796	0	0	204.581	0.963451	1.96271	3.47385	260.215	1.00462	3.03899	0.874078	3.48133	158.275
ENSG00000080293	SCTR	0.912993	0.582396	0.820548	0	0	8.89322	2.65823	46.1463	1.86832	0	2.94407	0	1.8008	17.0786	0	113.63	11.3143	9.95443
ENSG00000080298	RFX3	0.678963	0.060044	0.249845	432.69	881.733	408.199	802.786	244.477	322.286	659.001	428.853	515.287	338.55	336.549	984.633	468.506	645.786	446.954
ENSG00000080345	RIF1	-0.233347	0.09079	0.318403	689.709	683.234	1065.41	709.748	653.904	871.572	697.539	907.755	770.036	749.132	756.481	834.709	775.308	853.795	805.314
ENSG00000080371	RAB21	0.360058	0.247513	0.553315	2030.22	2602.43	1576.77	5238.05	2253.32	2022.46	2170.66	1810.6	1595.65	1944.86	2542.7	2647.97	1952.69	1943.45	1678.32
ENSG00000080493	SLC4A4	1.50782	0.266372	0.574057	7.07394	1.09668	0	1.32912	9.81837	10.2758	166.677	91.2662	22.001	18.9084	1.00462	4.05199	11.363	6.96265	8.95899
ENSG00000080503	SMARCA2	-0.0730309	0.844761	0.944065	7485.41	9178.14	6637.9	5317.8	1952.87	5306.97	3569.59	3684.01	2777.92	4349.83	5342.58	5673.79	7065.18	4805.1	5109.61
ENSG00000080546	SESN1	0.266595	0.628472	0.846081	990.352	1846.81	2169.06	4624	2252.33	1193.86	1188.9	828.265	599.818	944.518	2621.06	1813.26	452.773	1268.07	2242.73
ENSG00000080561	MID2	0.216212	0.41218	0.705988	145.016	182.049	163.635	251.203	173.785	149.466	265.913	215.899	115.795	163.873	181.837	104.339	194.919	199.306	186.148
ENSG00000080573	COL5A3	0.0381843	0.971362	0.989997	27.1168	53.7375	89.8215	67.7849	159.058	104.626	93.4548	2343.48	1386.07	1220.04	105.485	178.287	584.758	318.541	491.749
ENSG00000080603	SRCAP	-0.292134	0.343375	0.651376	108.467	177.663	240.117	196.709	100.147	205.515	153.189	92.2476	195.693	178.279	172.795	170.183	181.808	196.695	292.66
ENSG00000080608	PUM3	0.539529	0.252028	0.558463	198.07	866.38	257.014	758.926	194.404	259.697	553.021	443.573	272.118	261.116	254.169	264.392	201.038	248.044	269.765
ENSG00000080644	CHRNA3	-0.199861	0.793004	0.921836	499.892	415.643	409.977	67.7849	44.1827	198.976	138.737	43.1797	482.865	194.486	290.336	140.807	520.951	120.106	33.8451
ENSG00000080709	KCNN2	0.0754495	0.943268	0.979454	603.643	263.204	394.859	1984.37	2.94551	331.627	309.268	107.949	156.323	313.339	9.0416	424.446	180.06	310.708	31.8542
ENSG00000080802	CNOT4	0.0258621	0.870472	0.954743	561.199	624.013	554.937	789.495	483.064	586.653	527.008	505.399	462.022	497.921	486.237	555.122	535.81	584.863	566.407
ENSG00000080815	PSEN1	0.38425	0.361354	0.664003	824.114	1290.8	844.856	1919.24	654.885	996.75	2941.42	1591.76	889.305	931.913	668.074	1160.89	803.278	730.208	1006.39
ENSG00000080819	CPOX	0.662259	0.0705173	0.27432	380.814	309.265	188.536	86.3926	254.296	153.202	374.783	357.214	286.013	165.673	238.096	119.534	284.95	240.211	279.72
ENSG00000080822	CLDND1	0.0780395	0.708028	0.882581	1636.44	1424.59	964.914	1008.8	798.234	1282.6	1336.31	1523.07	1089.63	1321.79	1205.55	1302.71	1036.66	1233.26	1475.25
ENSG00000080823	MOK	0.743488	0.068789	0.269915	557.663	274.171	616.3	1927.22	640.158	541.813	1090.63	755.645	1109.32	413.283	852.925	1154.82	735.974	780.687	646.043
ENSG00000080824	HSP90AA1	0.344366	0.350716	0.65715	25410.8	41278.1	20168	50971.6	18368.2	19011.1	40925.5	22946.1	18585.1	27490.1	26075	35707.1	11235.4	24974.2	22095.9
ENSG00000080839	RBL1	0.511552	0.0842702	0.305592	103.751	83.3479	86.2642	51.8355	107.02	68.1938	161.86	134.446	92.6359	56.7251	89.4114	78.0007	113.63	80.9408	105.517
ENSG00000080845	DLGAP4	0.360024	0.258969	0.566244	1548.01	1605.54	843.077	486.457	840.453	701.555	691.758	1298.34	1144.05	1023.75	1045.81	1010.97	1564.6	1108.8	840.154
ENSG00000080854	IGSF9B	-0.653139	0.179653	0.465861	122.615	191.92	279.247	582.153	163.967	340.035	124.285	95.1916	130.848	298.032	157.726	156.001	103.141	159.271	348.405
ENSG00000080947	CROCCP3	-0.592667	0.0813834	0.298784	201.607	149.149	474.008	102.342	191.458	335.364	224.484	229.638	236.222	219.697	166.767	307.951	298.935	242.822	376.278
ENSG00000080986	NDC80	0.694338	0.344555	0.651723	37.7277	25.2237	34.6835	17.2785	17.6731	1.86832	76.1127	51.0306	8.10565	19.8088	53.245	15.1949	35.8372	17.4066	9.95443
ENSG00000081014	AP4E1	-0.0642623	0.765817	0.911874	172.133	164.502	198.319	134.241	172.803	199.91	272.657	215.899	182.956	214.295	148.684	200.573	190.549	234.119	250.852
ENSG00000081019	RSBN1	-0.0106587	0.947449	0.980855	497.534	449.64	474.898	643.292	621.503	699.687	734.15	556.43	536.131	592.462	537.473	628.058	616.225	570.067	623.147
ENSG00000081026	MAGI3	0.0809656	0.820682	0.934387	450.374	298.298	795.053	745.634	998.528	681.004	829.532	430.816	691.296	509.626	957.405	764.812	557.662	1174.08	501.703
ENSG00000081041	CXCL2	-0.224954	0.871837	0.954968	1.17899	4.38673	16.0078	3.98735	1.96367	0	4.81726	816.489	61.3713	39.6175	1.00462	3.03899	1.74816	2.61099	96.558
ENSG00000081051	AFP	-5.68279	4.73298e-10	7.80572e-08	1.17899	0	98.7147	3.98735	0	238.211	0.963451	0.981357	1.15795	45.0199	1.00462	5.06498	1.74816	1.74066	11.9453
ENSG00000081052	COL4A4	4.04333	0.000116667	0.0026186	268.81	15.3536	87.1535	1844.81	1141.88	42.9714	315.049	261.041	166.745	31.514	973.479	4424.77	89.156	1105.32	54.7494
ENSG00000081059	TCF7	0.853692	0.190114	0.480107	95.4982	21.9337	57.8059	15.9494	50.0737	8.40745	59.734	153.092	79.8985	36.9164	22.1017	52.6758	74.2967	92.2551	27.8724
ENSG00000081087	OSTM1	-0.223095	0.623118	0.84285	760.449	2840.41	1451.37	1549.75	534.119	1422.73	703.319	686.95	1255.22	1392.02	1397.43	1130.5	473.751	1525.69	1762.93
ENSG00000081138	CDH7	2.80567	5.25576e-06	0.000215877	852.41	409.063	7.11457	830.698	530.192	105.56	448.968	211.973	468.969	193.586	992.567	679.721	643.322	1490.01	1006.39
ENSG00000081148	IMPG2	-0.183581	0.742844	0.900711	4.71596	20.837	12.4505	3.98735	13.7457	12.1441	19.269	15.7017	10.4215	14.4064	8.03698	16.2079	9.61486	3.48133	10.9499
ENSG00000081154	PCNP	-0.0650023	0.678228	0.870805	3172.66	3742.98	2882.29	2377.79	2727.54	2851.99	3118.69	2769.39	2200.1	3421.52	3454.9	3009.61	2804.04	2759.82	2870.86
ENSG00000081177	EXD2	0.474175	0.149466	0.421771	814.682	1311.63	706.121	796.141	774.669	667.925	2066.6	1045.15	860.356	675.299	677.116	1036.3	699.263	636.212	668.938
ENSG00000081181	ARG2	4.17101	1.26677e-15	6.86447e-13	1134.19	856.51	96.9361	3033.04	2811	129.848	2128.26	707.559	599.818	59.4263	2120.76	3506.99	1013.93	1845.1	863.049
ENSG00000081189	MEF2C	-0.24623	0.739652	0.899648	182.744	237.98	946.238	296.393	78.547	100.889	98.272	1599.61	295.277	777.044	667.069	656.422	751.707	622.287	664.956
ENSG00000081237	PTPRC	-0.669232	0.354698	0.659336	27.1168	142.569	135.177	66.4558	31.4188	99.0211	26.0132	371.934	103.057	184.582	33.1525	33.4289	64.6818	40.0352	113.481
ENSG00000081277	PKP1	-1.02231	NA	NA	15.3269	4.38673	3.55729	0	2.94551	0	5.78071	325.811	10.4215	27.9124	3.01387	1.013	5.24447	6.09232	2.98633
ENSG00000081307	UBA5	-0.502193	0.00962759	0.0749269	709.752	813.739	1320.64	661.9	1215.51	1147.15	807.372	723.26	823.302	1105.69	946.354	625.019	808.523	959.105	995.443
ENSG00000081320	STK17B	2.60048	4.67479e-05	0.00129091	3279.95	435.383	860.863	1240.07	4116.84	242.882	7439.77	4053.99	1797.14	407.881	3909.99	4330.56	1618.79	3768.54	680.883
ENSG00000081377	CDC14B	0.0238112	0.959991	0.985717	486.923	872.96	506.913	509.052	195.386	424.109	82.8568	791.955	464.338	408.781	371.71	350.497	472.876	523.94	326.505
ENSG00000081386	ZNF510	0.657777	0.158786	0.436095	551.768	1900.55	444.661	427.976	244.477	431.582	661.891	397.45	445.81	379.968	605.787	969.438	783.174	467.368	471.84
ENSG00000081479	LRP2	3.67633	0.0140149	0.0968311	4.71596	2.19337	0.889322	89.0508	3.92735	0	3.85381	18.6458	1.15795	1.8008	1.00462	3.03899	1.74816	6.96265	133.389
ENSG00000081665	ZNF506	0.0877397	0.73673	0.897823	406.752	675.557	450.886	523.672	302.406	523.13	506.775	429.834	443.495	342.152	459.112	553.096	620.596	275.895	398.177
ENSG00000081692	JMJD4	0.00558312	0.974283	0.990484	514.04	413.45	402.863	493.102	543.938	495.105	513.52	329.736	448.126	460.104	519.39	485.225	449.276	401.223	343.428
ENSG00000081721	DUSP12	-0.121267	0.52705	0.787771	348.981	287.331	296.144	297.722	330.879	450.266	474.018	365.065	319.594	394.375	264.216	349.484	354.876	369.891	430.031
ENSG00000081760	AACS	0.53046	0.0330991	0.171988	925.508	783.032	865.31	1442.09	1321.55	744.526	1377.74	725.223	944.887	551.044	845.892	1245.99	1189.62	818.112	866.036
ENSG00000081791	KIAA0141	0.296716	0.275829	0.585297	1147.16	1010.05	1446.04	2117.28	1354.94	941.634	1742.88	1265.95	1284.17	883.291	737.393	1613.7	1089.1	1430.83	1280.14
ENSG00000081803	CADPS2	2.72359	8.96103e-05	0.0021538	75.4554	160.116	34.6835	502.406	1094.75	23.354	812.189	512.268	157.481	111.649	263.211	148.911	152.964	230.638	373.291
ENSG00000081818	PCDHB4	-2.68722	0.00116946	0.0155758	174.491	492.411	441.993	55.8229	135.494	1855.24	12.5249	249.265	106.531	1527.98	84.3883	93.1957	36.7113	765.021	169.225
ENSG00000081842	PCDHA6	3.8532	1.49081e-07	1.1556e-05	275.884	51.5441	8.89322	263.165	575.357	41.1031	186.91	96.173	45.16	8.10359	554.552	142.833	441.41	545.698	175.198
ENSG00000081853	PCDHGA2	0.292491	0.673388	0.868019	393.783	1629.67	981.811	2286.08	424.154	433.451	657.074	358.195	333.489	149.466	233.072	394.056	253.483	403.834	300.624
ENSG00000081870	HSPB11	-0.679107	0.047016	0.215388	278.242	95.4114	374.404	191.393	483.064	564.233	282.291	337.587	258.223	421.387	307.414	212.729	276.209	351.614	321.528
ENSG00000081913	PHLPP1	-0.450369	0.179409	0.465609	490.46	159.019	518.474	217.975	521.356	387.677	328.537	367.028	321.91	601.466	240.105	561.2	436.165	359.447	409.127
ENSG00000081923	ATP8B1	0.785128	0.352136	0.658172	101.393	274.171	41.7981	26.5823	62.8376	22.4199	61.6609	561.336	170.219	163.873	28.1294	25.3249	126.741	52.2199	81.6263
ENSG00000082014	SMARCD3	-0.152821	0.599755	0.829705	3113.71	3444.68	4451.05	4286.4	2490.92	3300.39	3238.16	2178.61	2273.05	3221.63	2788.83	3859.52	2806.67	2725.01	6276.27
ENSG00000082068	WDR70	0.362817	0.138226	0.404278	558.842	630.593	514.917	991.521	537.065	469.883	732.223	591.758	430.757	386.271	541.492	646.292	519.203	464.757	411.118
ENSG00000082074	FYB1	-1.00633	0.149801	0.422195	16.5059	127.215	87.1535	74.4305	44.1827	204.581	25.0497	268.892	56.7395	158.47	22.1017	40.5199	38.4595	47.8682	134.385
ENSG00000082126	MPP4	1.83871	0.0619986	0.254682	18.8638	10.9668	2.66796	7.9747	67.7468	5.60497	2.89035	4.90679	9.26359	2.7012	11.0508	8.10397	9.61486	4.35166	0.995443
ENSG00000082146	STRADB	-0.946331	0.0346739	0.176591	644.908	203.983	879.539	291.077	435.936	623.086	64.5512	257.116	265.17	489.817	318.465	401.147	475.499	334.207	443.968
ENSG00000082153	BZW1	0.597416	0.0527222	0.231411	2085.63	2361.16	859.974	2835.01	1376.54	957.515	1163.85	1790.98	1109.32	1392.02	1259.8	1314.87	1238.57	1734.57	1156.71
ENSG00000082175	PGR	-2.21913	NA	NA	0	2.19337	0.889322	0	0	1.86832	0.963451	162.905	5.78975	23.4104	2.00925	4.05199	2.62224	0.870332	108.503
ENSG00000082196	C1QTNF3	-0.0120389	0.983277	0.993802	69.5604	38.3839	109.387	128.924	56.9466	87.8112	29.867	54.956	128.532	45.9203	31.1433	225.898	96.1486	39.1649	65.6993
ENSG00000082212	ME2	-0.180166	0.49405	0.765124	1355.84	1568.26	1945.84	1019.43	1679.92	1633.85	1460.59	800.787	1039.84	1386.61	1438.62	1369.57	2087.3	1771.99	1938.13
ENSG00000082213	C5orf22	0.407865	0.123843	0.382169	187.459	363.002	151.185	206.013	194.404	184.03	356.477	205.104	189.904	171.976	202.934	240.08	196.668	194.954	154.294
ENSG00000082258	CCNT2	0.0475255	0.822877	0.935597	660.235	648.14	799.5	1056.65	932.745	922.017	530.862	712.465	1016.68	716.717	1004.62	894.476	834.745	822.463	966.575
ENSG00000082269	FAM135A	-0.441737	0.152471	0.426513	254.662	220.433	388.634	227.279	139.421	243.816	224.484	279.687	222.326	264.717	237.091	153.975	96.1486	296.783	290.669
ENSG00000082397	EPB41L3	-0.586791	0.0816528	0.299325	1947.69	1504.65	4416.37	1528.48	3868.44	3167.74	3575.37	1633.96	2651.7	2377.95	1664.66	2520.34	1446.6	2553.55	1635.51
ENSG00000082438	COBLL1	-0.168762	0.807023	0.927805	54.2336	149.149	776.378	546.267	415.317	46.7081	220.63	309.128	275.592	182.781	415.914	55.7148	326.905	322.023	488.763
ENSG00000082458	DLG3	0.238441	0.345468	0.652539	743.943	1238.16	671.438	709.748	506.628	696.884	814.116	666.342	548.868	487.116	691.18	867.125	801.53	647.527	520.617
ENSG00000082482	KCNK2	-2.65163	0.00619255	0.0547033	104.93	796.192	1048.51	51.8355	1.96367	848.218	25.0497	473.014	52.1077	1175.02	47.2173	71.9228	114.504	147.956	68.6856
ENSG00000082497	SERTAD4	-0.473737	0.615759	0.838932	117.899	74.5745	113.833	6.64558	19.6367	16.8149	26.9766	459.275	45.16	232.303	14.0647	41.5329	64.6818	44.3869	130.403
ENSG00000082512	TRAF5	0.760119	0.325661	0.635637	48.3386	17.5469	51.5807	9.30382	118.802	25.2224	96.3451	363.102	83.3724	90.0399	34.1572	44.5719	143.349	114.884	55.7448
ENSG00000082515	MRPL22	0.0955622	0.738111	0.898748	763.986	1002.37	565.609	1289.24	659.795	712.765	584.815	436.704	508.34	714.016	623.871	789.124	551.543	644.916	663.961
ENSG00000082516	GEMIN5	0.145439	0.586045	0.822603	364.308	438.673	449.997	346.899	403.535	397.953	786.176	432.779	350.859	310.638	302.391	331.25	370.609	518.718	477.813
ENSG00000082556	OPRK1	5.79096	9.79562e-06	0.000370087	35.3697	10.9668	1.77864	102.342	360.334	0.934161	11.5614	39.2543	4.6318	1.8008	17.0786	4.05199	28.8446	373.372	12.9408
ENSG00000082641	NFE2L1	0.657135	0.128386	0.389222	15502.5	14048.5	9905.26	5534.44	16925.9	12816.7	51781.7	19331.8	16126.8	14064.2	19923.7	15475.5	23917.4	15460.6	18008.6
ENSG00000082684	SEMA5B	-1.10876	0.195555	0.488463	8.25293	7.67678	101.383	5.31647	28.4733	38.3006	22.1594	66.7323	114.637	159.371	20.0925	15.1949	57.6892	40.9056	167.234
ENSG00000082701	GSK3B	0.0859752	0.80645	0.92768	1314.57	1112.04	1344.65	555.571	1377.52	964.989	1692.78	860.65	735.298	1083.18	1501.91	851.93	2220.16	1316.81	863.049
ENSG00000082781	ITGB5	0.246929	NA	NA	640.192	258.817	211.659	544.938	702.995	141.993	449.932	4234.56	1021.31	1923.25	881.054	358.601	515.706	803.316	396.186
ENSG00000082805	ERC1	-0.189691	0.485769	0.759275	656.698	875.153	1323.31	1144.37	744.233	1033.18	1480.82	1102.06	559.29	916.606	1029.74	714.163	913.412	1012.2	1246.29
ENSG00000082898	XPO1	0.070084	0.702306	0.880979	2429.9	2948.98	2665.3	2391.08	1812.47	2271.88	3341.25	2824.35	1971.99	2133.04	2311.64	2715.84	2623.11	2053.11	2264.63
ENSG00000082996	RNF13	0.266869	0.133583	0.397729	830.009	935.471	672.327	1048.67	1153.66	822.062	923.95	1097.16	761.931	816.662	837.855	814.449	675.663	898.182	1145.76
ENSG00000083067	TRPM3	-0.620143	0.27683	0.586371	417.363	133.795	834.184	1109.81	284.733	539.011	559.765	242.395	138.954	416.885	343.581	153.975	167.823	583.992	523.603
ENSG00000083093	PALB2	0.152669	0.434223	0.722281	145.016	224.82	154.742	167.469	199.313	140.124	186.91	153.092	120.427	166.574	174.804	163.092	209.779	166.233	139.362
ENSG00000083097	DOPEY1	-0.55813	0.131021	0.393344	919.613	1549.61	1680.82	820.065	381.935	1553.51	584.815	675.174	977.309	1075.08	1349.21	1212.56	657.307	1024.38	1555.88
ENSG00000083099	LYRM2	-0.154854	0.559774	0.807488	1463.13	2156.08	1358.88	1057.98	1133.04	1678.69	1215.88	798.825	1160.27	1294.77	1470.77	1191.28	833.871	1475.21	1609.63
ENSG00000083123	BCKDHB	0.0954392	0.727262	0.892793	439.763	606.466	530.925	523.672	410.408	468.949	875.777	472.033	538.446	396.175	575.649	349.484	298.935	476.071	400.168
ENSG00000083168	KAT6A	0.030962	0.924572	0.972739	1197.85	1458.59	1637.24	967.597	665.686	1596.48	2536.77	1693.82	1182.27	1352.4	1482.82	2442.33	1775.25	1566.6	1770.89
ENSG00000083223	ZCCHC6	0.22381	0.595299	0.827622	206.323	835.673	362.843	740.318	204.222	255.026	440.297	414.133	275.592	383.57	303.396	420.394	230.757	272.414	336.46
ENSG00000083290	ULK2	0.0535722	0.880203	0.957859	817.04	298.298	737.248	188.735	608.739	452.134	718.735	664.379	519.919	401.578	624.875	506.498	666.922	556.142	433.018
ENSG00000083312	TNPO1	-0.563408	0.0705285	0.27432	1609.32	2647.39	4141.57	1541.78	1986.26	3392.87	5080.28	2246.33	1767.03	2986.62	2835.04	1966.23	2088.17	2345.54	2363.18
ENSG00000083444	PLOD1	-0.838964	0.00399286	0.0401377	2814.25	1628.57	4528.43	1989.69	1267.55	2295.23	924.913	1566.25	1870.09	2986.62	1833.44	2003.71	1700.96	2531.79	1807.72
ENSG00000083454	P2RX5	1.63339	0.190088	0.480107	0	27.4171	5.33593	7.9747	5.89102	0.934161	75.1492	36.3102	4.6318	10.8048	7.03236	0	13.1112	32.2023	1.99089
ENSG00000083457	ITGAE	-0.139709	0.594969	0.827529	311.254	222.627	245.453	116.962	284.733	263.433	321.793	258.097	210.747	284.526	174.804	250.21	291.068	183.64	252.843
ENSG00000083520	DIS3	0.606357	0.022767	0.134433	785.208	903.667	758.591	1508.55	1160.53	720.238	1738.07	954.861	971.519	652.789	987.544	1465.81	898.553	908.626	698.801
ENSG00000083535	PIBF1	0.532143	0.0624843	0.255973	208.681	506.668	251.678	461.203	332.843	208.318	349.733	408.245	290.645	246.709	278.28	493.329	257.853	232.379	269.765
ENSG00000083544	TDRD3	-0.117988	0.758542	0.908217	227.545	553.825	386.855	661.9	421.208	373.664	333.354	386.655	341.595	568.152	347.599	837.748	230.757	247.174	309.583
ENSG00000083635	NUFIP1	0.322529	0.307852	0.618115	188.638	225.917	189.425	296.393	155.13	123.309	308.304	151.129	113.479	144.064	180.832	231.976	166.949	150.567	117.462
ENSG00000083642	PDS5B	-0.387605	0.0407	0.19557	921.971	947.534	1249.5	808.103	759.942	1080.82	693.685	807.657	800.143	1160.61	990.558	1377.68	738.596	887.738	940.694
ENSG00000083720	OXCT1	0.389462	0.147855	0.420486	1655.3	2230.65	1631.91	2367.16	1268.53	944.437	2098.4	1091.27	1702.19	1277.67	1860.56	1468.85	1801.48	1662.33	989.471
ENSG00000083750	RRAGB	0.0504621	0.860164	0.950802	1025.72	693.104	963.135	1472.66	1049.58	1029.45	743.784	549.56	719.087	813.06	1373.32	694.916	1215.84	970.42	1114.9
ENSG00000083799	CYLD	-0.0362956	0.900953	0.964889	2600.85	1790.88	2616.38	3479.63	3774.18	2491.41	1679.3	1470.07	1732.29	2345.54	3042	1621.81	2715.76	2657.99	2508.52
ENSG00000083807	SLC27A5	0.00247964	0.992712	0.996032	267.631	325.715	195.651	361.52	177.713	356.85	324.683	187.439	312.646	232.303	264.216	298.834	187.927	189.732	248.861
ENSG00000083812	ZNF324	0.656601	0.0135718	0.0950762	397.32	484.734	313.931	943.673	444.772	369.928	710.064	454.368	536.131	326.845	433.997	417.355	495.602	399.482	657.988
ENSG00000083814	ZNF671	-0.197783	0.666607	0.865244	676.741	762.195	647.426	502.406	57.9284	707.16	603.121	366.046	484.023	509.626	705.245	663.513	681.781	483.034	515.64
ENSG00000083817	ZNF416	0.00716779	0.978615	0.991986	154.448	210.563	128.952	199.367	108.984	178.425	238.936	142.297	108.847	145.865	114.527	136.755	142.475	132.29	133.389
ENSG00000083828	ZNF586	-0.31462	0.330117	0.639661	205.144	143.665	175.196	276.456	94.2564	254.092	203.288	158.98	116.953	161.171	93.4299	109.404	184.431	152.308	162.257
ENSG00000083838	ZNF446	0.32364	0.218853	0.517709	415.005	373.969	459.779	877.217	485.028	436.253	599.267	406.282	660.031	318.741	389.794	559.174	448.402	407.315	462.881
ENSG00000083844	ZNF264	-0.131009	0.493899	0.765115	485.744	507.764	498.02	736.331	622.485	678.201	560.729	474.977	540.762	542.94	372.715	497.381	453.647	444.739	585.321
ENSG00000083845	RPS5	0.287587	0.408556	0.702445	6826.36	11147.8	3529.72	10413.6	5714.29	6088.86	9581.52	8146.25	5815.22	6802.51	4696.61	4907.97	4161.49	4092.3	4672.61
ENSG00000083857	FAT1	-1.43589	NA	NA	11.7899	50.4474	64.9205	23.9241	2360.34	43.9056	78.0396	2484.8	209.589	874.287	90.416	54.7018	311.172	156.66	197.098
ENSG00000083896	YTHDC1	0.722349	0.03194	0.167548	2333.22	2611.2	2222.41	5204.82	2711.83	2414.81	3859.59	2839.07	2846.24	1880.93	3459.92	7987.48	2883.58	2765.04	3514.91
ENSG00000083937	CHMP2B	0.185513	0.353477	0.658602	663.772	1000.18	562.051	808.103	854.198	746.395	977.903	839.06	648.452	761.737	984.53	611.85	713.248	591.825	723.687
ENSG00000084070	SMAP2	0.759569	0.00516971	0.0482998	2844.9	3019.17	1682.6	1625.51	4460.49	1781.45	3489.62	1778.22	2707.29	1833.21	3531.25	3512.06	3755.04	2913.87	2232.78
ENSG00000084072	PPIE	0.0247394	0.889863	0.96184	842.978	1029.79	747.03	802.786	839.471	955.647	1122.42	736.999	724.876	953.522	798.675	1110.24	942.257	764.151	1092
ENSG00000084073	ZMPSTE24	-0.0126247	0.970469	0.98954	450.374	775.355	710.568	578.166	737.36	583.851	1301.62	969.581	488.655	666.295	492.265	369.744	448.402	500.441	661.97
ENSG00000084090	STARD7	0.267627	0.346129	0.652844	3022.93	3341.59	2267.77	1605.57	3596.47	2090.65	2009.76	1924.44	2018.31	1892.64	3250.96	1814.28	3385.31	2522.22	1607.64
ENSG00000084092	NOA1	0.174881	0.437337	0.72454	497.534	608.659	337.942	311.013	367.207	390.479	608.901	406.282	402.966	430.391	450.071	474.082	422.18	379.465	303.61
ENSG00000084093	REST	-0.568171	0.518633	0.781204	3.53697	20.837	10.6719	5.31647	7.8547	0.934161	15.4152	284.594	53.2657	72.0319	11.0508	9.11697	32.3409	18.277	31.8542
ENSG00000084110	HAL	2.01887	0.00979215	0.0758032	3.53697	36.1905	15.1185	18.6076	14.7276	5.60497	108.87	36.3102	44.0021	3.6016	36.1664	459.9	17.4816	46.1276	7.96355
ENSG00000084112	SSH1	0.150673	0.560171	0.807618	904.286	812.642	800.389	505.064	655.867	730.514	1279.46	1003.93	589.396	647.387	667.069	666.552	1070.75	819.852	694.819
ENSG00000084207	GSTP1	-0.70642	0.124658	0.383623	2918	1108.75	1279.73	2602.41	2847.33	7055.72	1242.85	3418.07	2726.97	5091.76	2785.82	3512.06	2460.53	1875.56	5416.21
ENSG00000084234	APLP2	-0.0204463	0.945869	0.980346	4403.53	6712.8	3873.88	4818.05	3059.4	4260.71	6076.49	7683.05	3088.25	6353.21	4021.5	2850.57	4324.07	4896.49	5201.19
ENSG00000084444	FAM234B	1.26078	0.000427884	0.00731764	1016.29	1662.57	293.476	976.901	577.32	559.563	2228.46	900.886	780.458	467.307	936.308	1121.39	826.004	826.815	801.332
ENSG00000084453	SLCO1A2	-0.462507	0.707461	0.882281	14.1479	4.38673	163.635	29.2406	4.90919	5.60497	146.445	52.0119	8.10565	5.40239	2.00925	49.6368	0.874078	20.888	174.203
ENSG00000084463	WBP11	0.44416	0.109789	0.356307	1631.72	2097.95	1184.58	3434.44	1474.72	1456.36	2443.31	1543.67	1170.69	1427.13	1593.33	2071.58	1614.42	1589.23	1476.24
ENSG00000084623	EIF3I	0.294293	0.297492	0.607216	2135.15	1976.22	1736.85	2053.49	2803.15	1609.56	4468.49	2628.07	2054.2	2272.61	2167.98	1877.08	2069.82	1953.89	1373.71
ENSG00000084628	NKAIN1	3.06912	0.0144867	0.0991176	12.9689	0	4.44661	70.4432	129.603	1.86832	14.4518	3.92543	4.6318	2.7012	7.03236	3.03899	1.74816	30.4616	24.8861
ENSG00000084636	COL16A1	-0.0616691	0.952104	0.982139	308.896	27.4171	617.189	277.785	1395.19	245.684	60.6974	2999.03	1218.16	1545.98	136.629	70.9098	143.349	665.804	1928.17
ENSG00000084652	TXLNA	-0.161779	0.498428	0.768551	2181.13	1980.61	2842.27	1931.21	2430.05	2699.73	3905.83	2075.57	2046.1	2459.89	2823.99	1489.11	2979.73	2262.86	2503.54
ENSG00000084676	NCOA1	-0.108524	0.675595	0.86925	1609.32	1200.87	2359.37	1452.72	2057.93	1750.62	1206.24	1380.77	1606.08	1674.74	2455.3	1600.53	2557.55	2324.66	2007.81
ENSG00000084693	AGBL5	0.434748	0.15767	0.434395	585.958	300.491	514.028	435.95	1056.46	546.484	790.994	601.572	688.98	389.873	684.148	573.356	930.019	700.617	490.754
ENSG00000084710	EFR3B	0.316895	0.475789	0.75231	2686.92	1376.34	2815.59	2053.49	3059.4	1201.33	1214.91	754.664	3515.53	1902.54	4287.73	3707.57	2714.01	2624.92	1499.14
ENSG00000084731	KIF3C	0.207743	0.695561	0.878794	3453.26	1431.17	1910.26	659.242	1693.67	1433.94	602.157	798.825	1398.8	990.439	2464.34	1248.01	3532.15	2144.5	597.266
ENSG00000084733	RAB10	-0.201288	0.292971	0.602591	2381.56	2653.97	2494.55	2016.27	2299.46	2404.53	1623.42	1814.53	1637.34	2350.04	2938.52	1755.52	2079.43	2237.62	1782.84
ENSG00000084754	HADHA	-0.184722	0.371753	0.673108	4098.17	5162.09	4673.38	5214.12	3702.51	4629.7	2572.42	3053.98	3749.44	4699.18	5137.64	3564.74	4348.54	4000.91	4675.6
ENSG00000084764	MAPRE3	-0.571011	0.0672904	0.267043	4812.64	3218.76	6069.62	4261.15	4133.53	5802.08	2061.79	1449.46	3585.01	4629.85	3566.41	4087.44	3935.98	3718.06	5602.35
ENSG00000084774	CAD	-0.297516	0.233841	0.536816	747.48	996.885	1520.74	652.596	738.342	840.745	606.011	733.074	1151	650.088	738.398	842.813	853.101	778.947	963.589
ENSG00000085063	CD59	0.988145	0.000795705	0.0116356	7613.92	9613.52	4055.31	6171.09	15255.8	4979.08	7606.45	7942.12	12182.8	6368.52	15513.4	13191.2	8768.75	7314.27	11040.5
ENSG00000085117	CD82	-2.5533	0.0070708	0.0601098	51.8756	57.0275	2359.37	39.8735	141.385	66.3254	458.603	689.894	137.796	406.08	77.3559	21.2729	62.0596	152.308	39.8177
ENSG00000085185	BCORL1	0.106505	0.756043	0.907079	215.755	171.083	200.097	150.19	337.752	316.681	404.65	361.139	390.229	247.61	247.137	127.638	308.55	295.042	280.715
ENSG00000085224	ATRX	-0.013493	0.940704	0.978583	1790.89	1570.45	2271.33	2924.06	2056.95	2304.58	2504.01	1875.37	2106.31	2042.1	2532.65	1829.47	2186.94	2533.54	2315.4
ENSG00000085231	AK6	0.202544	0.472753	0.750249	361.95	426.61	227.666	530.318	426.117	372.73	178.238	286.556	280.224	315.14	382.761	404.186	323.409	366.41	248.861
ENSG00000085265	FCN1	-0.291219	0.762787	0.910433	1.17899	4.38673	0.889322	13.2912	16.6912	9.34161	11.5614	270.855	31.2646	31.514	7.03236	1.013	4.37039	5.22199	29.8633
ENSG00000085274	MYNN	-0.0130888	0.948176	0.981165	229.903	296.104	228.556	277.785	227.786	314.812	340.098	341.512	264.012	282.725	220.012	215.768	233.379	268.932	358.36
ENSG00000085276	MECOM	0.537837	0.519232	0.781568	17.6849	61.4143	79.1496	17.2785	41.2372	83.1403	27.9401	291.463	163.271	85.5379	63.2912	29.3769	75.1707	365.539	284.697
ENSG00000085365	SCAMP1	0.213998	0.356304	0.66061	1942.98	3726.53	2025.87	2686.14	1985.27	1910.36	2425.01	1423.95	1791.35	1870.13	2477.4	2161.73	1966.68	2343.8	2009.8
ENSG00000085377	PREP	-1.12815	0.00234535	0.0266838	636.655	322.425	1437.14	220.633	279.824	567.97	387.307	490.679	518.761	551.944	385.775	292.756	223.764	551.79	369.309
ENSG00000085382	HACE1	0.836701	0.00359851	0.0370719	479.849	614.143	223.22	299.051	356.407	228.869	260.132	295.389	409.914	182.781	505.325	276.548	277.083	480.423	281.71
ENSG00000085415	SEH1L	-0.15698	0.442648	0.728629	606.001	741.358	591.399	426.646	538.047	632.427	859.399	573.113	511.814	692.407	571.63	534.862	422.18	563.104	525.594
ENSG00000085433	WDR47	-0.263915	0.196078	0.488611	754.554	581.242	670.548	447.912	524.301	848.218	628.17	506.38	529.183	704.112	672.092	489.277	792.789	814.63	660.974
ENSG00000085449	WDFY1	-0.732124	0.00893029	0.0707781	754.554	527.505	1108.09	507.723	758.96	1375.09	401.759	800.787	648.452	1225.44	918.225	608.811	999.946	853.795	1147.75
ENSG00000085465	OVGP1	0.94326	0.229752	0.532018	9.43192	10.9668	37.3515	139.557	77.5651	16.8149	69.3685	84.3967	30.1067	18.008	11.0508	65.8448	11.363	16.5363	29.8633
ENSG00000085491	SLC25A24	-0.293324	0.353967	0.658602	293.569	278.558	447.329	392.089	525.283	399.821	468.237	558.392	239.696	433.092	169.781	240.08	312.92	369.021	330.487
ENSG00000085511	MAP3K4	0.217751	0.473876	0.750776	1247.37	973.855	910.665	1026.08	691.213	836.074	673.452	721.298	1594.5	658.192	993.572	716.189	467.632	990.437	1093.99
ENSG00000085514	PILRA	0.99864	0.128932	0.390003	104.93	71.2844	113.833	418.672	34.3643	78.4695	118.505	131.502	600.976	102.645	352.623	140.807	178.312	126.198	80.6309
ENSG00000085563	ABCB1	1.63557	0.0462539	0.212822	64.8445	19.7403	48.0234	83.7343	49.0919	11.2099	481.726	355.251	93.7939	80.1355	46.2126	286.678	63.8077	145.345	41.8086
ENSG00000085644	ZNF213	-0.247569	0.327443	0.637605	707.394	682.137	658.987	995.508	444.772	771.617	421.992	390.58	563.921	710.415	496.284	682.76	603.114	557.883	670.929
ENSG00000085662	AKR1B1	-0.362738	0.213273	0.510402	5232.36	2337.03	3105.51	2621.02	3019.15	3499.37	2152.35	1664.38	1775.14	3545.77	2520.6	1874.04	2618.74	2966.09	2796.2
ENSG00000085719	CPNE3	-0.0291075	0.92646	0.973314	2182.31	1948.81	2263.32	596.773	1807.56	1717.92	2177.4	1786.07	1240.16	1519.87	2039.38	2456.52	2090.8	1438.66	1798.77
ENSG00000085721	RRN3	0.157719	0.680023	0.871853	939.655	2957.75	1751.07	3871.72	1659.3	1717.92	1550.19	1041.22	1219.32	1162.41	1515.98	1749.45	1457.09	1268.07	1438.42
ENSG00000085733	CTTN	-0.481737	0.0239254	0.138513	2925.08	3497.32	7840.26	4003.3	4223.86	3973.92	4070.58	4479.9	3666.07	3851.91	3194.7	3491.8	3670.26	3272.45	4379.95
ENSG00000085741	WNT11	1.67107	0.0624889	0.255973	21.2218	4.38673	9.78254	31.8988	7.8547	1.86832	54.9167	43.1797	30.1067	10.8048	1.00462	21.2729	52.4447	13.055	4.97722
ENSG00000085760	MTIF2	0.0695389	0.75514	0.906612	476.312	877.347	676.774	639.305	651.94	539.945	559.765	484.79	501.392	547.442	867.994	440.654	651.188	615.324	639.075
ENSG00000085788	DDHD2	-0.158641	0.672472	0.867921	1415.97	2106.73	1666.59	525.001	586.157	1544.17	2160.06	1330.72	944.887	1401.92	1676.71	1819.34	1206.23	1154.93	1601.67
ENSG00000085831	TTC39A	1.07322	0.0210494	0.127124	855.947	225.917	416.203	334.937	1155.62	284.919	1524.18	517.175	811.722	420.486	1028.73	624.006	767.441	1201.06	392.205
ENSG00000085832	EPS15	0.501965	0.138542	0.404803	3707.93	1893.97	2389.61	1753.1	4963.19	2023.39	1962.55	2073.61	2251.05	1801.7	4022.51	3230.45	3436.88	4087.08	1819.67
ENSG00000085840	ORC1	0.343663	0.470427	0.748751	40.0857	29.6104	34.6835	33.2279	41.2372	30.8273	38.5381	32.3848	18.5272	18.008	43.1988	19.2469	86.5338	23.499	16.9225
ENSG00000085871	MGST2	0.069074	0.671816	0.867783	684.994	616.336	407.309	566.204	588.12	558.628	476.908	586.852	514.129	621.275	469.159	503.459	478.121	540.476	637.084
ENSG00000085872	CHERP	0.119357	0.691621	0.877528	1262.7	1295.18	1541.19	3090.2	1110.46	1296.62	2064.68	1223.75	1137.11	1202.03	1111.11	1308.79	1339.09	1252.41	1360.77
ENSG00000085978	ATG16L1	-0.205459	0.366412	0.669173	423.258	436.48	449.997	283.102	375.062	442.792	248.57	449.462	459.706	412.383	233.072	336.315	443.158	417.759	421.072
ENSG00000085982	USP40	-0.279539	0.235461	0.538302	506.966	447.447	996.929	639.305	980.855	897.729	600.23	656.528	876.568	727.522	705.245	688.838	756.078	820.723	960.603
ENSG00000085998	POMGNT1	0.154714	0.532526	0.79109	3275.24	2834.93	3937.92	2094.69	2860.09	2393.32	4861.58	2446.52	3239.94	2498.61	3257.99	3410.76	2940.4	3537.9	4556.14
ENSG00000085999	RAD54L	0.502409	0.466845	0.745794	35.3697	12.0635	24.901	6.64558	39.2735	16.8149	30.8304	17.6644	17.3692	12.6056	34.1572	11.143	83.0375	10.444	8.95899
ENSG00000086015	MAST2	0.228487	0.496835	0.767358	3394.31	2549.79	2215.3	4929.69	1624.94	2467.12	3118.69	2133.47	1619.97	1667.54	1366.29	2307.61	2422.95	2486.54	1806.73
ENSG00000086061	DNAJA1	0.503194	0.19648	0.488888	7578.55	14883.1	4333.66	9818.18	2741.29	4521.34	6580.37	4690.89	4522.95	5160.19	6215.6	7240.9	3928.98	4997.44	6261.34
ENSG00000086062	B4GALT1	-0.796262	0.213968	0.511226	413.826	259.914	735.469	183.418	411.39	551.155	881.558	2196.28	553.5	1488.36	245.128	292.756	369.735	329.856	253.838
ENSG00000086065	CHMP5	0.130075	0.725008	0.89211	1908.79	4617.04	1508.29	3382.6	1108.49	2132.69	2445.24	1587.84	1394.17	2158.26	1763.11	2140.46	1697.46	1422.99	1919.21
ENSG00000086102	NFX1	0.529699	0.111628	0.359326	958.519	2747.19	865.31	2432.28	909.181	1024.77	1424.94	1105.99	1221.64	1102.09	1225.64	1726.15	1298.88	966.938	1263.22
ENSG00000086159	AQP6	2.41612	0.0133237	0.0941143	5.89495	36.1905	8.89322	46.5191	13.7457	1.86832	24.0863	36.3102	9.26359	0	2.00925	8.10397	8.74078	34.8133	4.97722
ENSG00000086189	DIMT1	0.428778	0.0939954	0.32413	469.238	600.982	434.878	851.964	577.32	393.282	640.695	631.013	342.753	397.076	470.163	730.371	385.469	453.443	445.959
ENSG00000086200	IPO11	0.306435	0.199053	0.491832	159.164	225.917	191.204	299.051	213.059	177.491	329.5	306.183	224.642	196.287	187.864	154.988	206.283	237.601	250.852
ENSG00000086205	FOLH1	-1.52137	0.33801	0.64682	10.6109	7.67678	1.77864	3.98735	0	58.8522	0.963451	22.5712	349.701	253.012	1.00462	4.05199	33.215	2.61099	0.995443
ENSG00000086232	EIF2AK1	-0.0931324	0.737045	0.897919	2253.05	3367.91	3003.24	3728.17	2971.04	2347.55	3480.95	1992.16	1644.29	2537.32	1575.25	2515.27	1865.28	2036.58	2152.15
ENSG00000086289	EPDR1	-1.57486	0.0462024	0.212811	330.117	151.342	1033.39	182.089	148.257	1089.23	845.91	1866.54	106.531	1712.56	312.438	151.949	43.7039	396.871	613.193
ENSG00000086300	SNX10	-0.509228	0.206591	0.502077	305.359	376.162	656.319	106.329	406.481	363.389	651.293	273.799	176.008	399.777	426.965	286.678	387.217	360.317	230.943
ENSG00000086475	SEPHS1	-0.374462	0.0775606	0.290657	1404.18	1254.61	1370.44	937.027	1565.05	1720.72	888.302	1167.82	1190.37	1913.35	1224.63	1884.17	1431.74	1158.41	1333.89
ENSG00000086504	MRPL28	-0.881037	0.000116036	0.00260861	1288.64	1430.07	2370.93	1715.89	1189	2173.79	730.296	873.408	1118.58	2202.38	1065.9	1554.95	1089.1	1133.17	1468.28
ENSG00000086506	HBQ1	1.13484	0.291526	0.600941	35.3697	4.38673	13.3398	11.962	0.981837	9.34161	63.5878	35.3289	8.10565	12.6056	1.00462	94.2087	2.62224	45.2572	6.9681
ENSG00000086544	ITPKC	1.06639	0.000146128	0.00314096	1031.62	539.568	715.015	1267.98	1564.07	404.492	1329.56	1114.82	853.409	448.399	978.502	1222.69	795.411	1308.98	1127.84
ENSG00000086589	RBM22	0.0330701	0.838222	0.941436	852.41	1110.94	868.867	784.179	715.759	808.984	841.093	1004.91	831.408	859.881	625.88	1009.96	886.316	914.718	808.3
ENSG00000086598	TMED2	0.58363	0.0348259	0.17727	3283.49	7257.85	2820.93	7310.14	6207.17	3088.34	5225.76	3726.21	3850.18	3424.22	4027.53	4294.09	3521.66	3686.72	3560.7
ENSG00000086619	ERO1B	1.34589	0.0151507	0.102515	1397.1	512.151	304.148	442.596	3502.21	943.503	1164.81	805.694	1410.38	423.187	2397.03	1550.9	1905.49	1400.36	497.722
ENSG00000086666	ZFAND6	-0.513041	0.0391322	0.189926	806.43	852.123	974.696	914.432	577.32	1105.11	465.347	821.396	611.397	1154.31	1061.89	575.382	596.121	1051.36	732.646
ENSG00000086712	TXLNG	0.482428	0.137258	0.402486	898.391	786.322	682.11	2190.38	764.851	748.263	1389.3	740.925	744.561	670.797	926.262	729.358	721.115	941.699	911.826
ENSG00000086730	LAT2	-0.152923	0.75439	0.9063	77.8134	151.342	70.2564	85.0635	36.328	100.889	42.3919	127.576	172.534	121.554	52.2404	122.573	35.8372	53.9606	96.558
ENSG00000086758	HUWE1	0.272056	0.229613	0.531857	5923.25	5203.76	6198.57	9917.87	5217.48	5216.36	9558.4	5169.79	6193.87	5201.6	6768.14	5978.71	5528.55	8036.64	6765.03
ENSG00000086827	ZW10	0.0348774	0.890601	0.96202	277.063	346.552	276.579	168.798	235.641	280.248	275.547	215.899	259.381	252.112	376.733	199.56	413.439	244.563	299.628
ENSG00000086848	ALG9	-0.279633	0.182244	0.469116	182.744	188.629	241.895	160.823	205.204	298.932	329.5	222.768	222.326	251.211	200.925	189.43	190.549	240.211	273.747
ENSG00000086967	MYBPC2	3.74263	0.00194364	0.0231552	17.6849	9.87015	0	9.30382	2.94551	1.86832	5.78071	122.67	18.5272	2.7012	2.00925	25.3249	4.37039	190.603	15.9271
ENSG00000087008	ACOX3	0.0804848	0.848623	0.945096	232.261	118.442	222.33	85.0635	508.592	174.688	186.91	256.134	282.54	246.709	179.827	117.508	291.942	247.174	215.016
ENSG00000087053	MTMR2	-0.368791	0.11945	0.374027	344.265	454.027	630.529	301.709	462.445	540.879	639.732	627.087	345.069	509.626	423.951	331.25	384.595	409.926	480.799
ENSG00000087074	PPP1R15A	0.782691	0.257154	0.564163	582.421	459.51	264.129	1997.66	312.224	481.093	430.663	3845.94	848.777	994.04	430.983	418.368	543.677	593.566	1505.11
ENSG00000087076	HSD17B14	0.464819	0.355882	0.660178	608.359	106.378	705.232	910.445	1260.68	654.847	622.39	487.735	1368.7	497.02	1602.37	686.812	1107.46	840.74	650.024
ENSG00000087077	TRIP6	-1.15992	0.0415412	0.198907	29.4748	59.2209	114.722	55.8229	68.7286	47.6422	107.907	1521.1	217.694	439.395	94.4345	58.7538	87.4078	115.754	93.5717
ENSG00000087085	ACHE	0.576023	0.467136	0.745794	82.5293	153.536	75.5923	30.5697	16.6912	42.0373	119.468	96.173	26.6328	50.4223	16.074	344.419	27.0964	32.2023	56.7403
ENSG00000087086	FTL	0.319728	0.297527	0.607216	11574.2	14119.8	4696.51	18098.6	10790.4	9638.68	13829.4	16777.3	11169.6	14680.1	11016.7	8935.64	10940	9217.68	8387.6
ENSG00000087087	SRRT	-0.0752109	0.789302	0.920771	3123.15	2651.78	4497.3	7122.74	3193.92	3653.5	3796	3211	4160.51	3177.51	2893.31	4079.34	2458.78	2977.4	3347.68
ENSG00000087088	BAX	0.148905	0.567011	0.81176	808.788	1252.41	626.082	994.179	917.036	870.638	1291.99	1034.35	721.402	854.478	649.991	542.966	805.026	691.914	717.715
ENSG00000087095	NLK	-0.372272	0.348505	0.65469	470.417	303.781	798.611	551.583	746.196	822.996	1621.49	766.44	457.39	768.941	482.219	386.965	563.781	549.179	486.772
ENSG00000087111	PIGS	0.0220897	0.949078	0.981527	1229.69	1465.17	1218.37	871.901	1256.75	1798.26	3376.9	1720.32	1594.5	1582.9	1454.69	902.58	1232.45	1442.14	2133.23
ENSG00000087116	ADAMTS2	-0.592267	0.514699	0.778468	637.834	206.176	1815.99	41.2026	159.058	73.7987	90.5644	1368.01	427.283	665.395	153.707	1479.99	166.949	964.327	1084.04
ENSG00000087152	ATXN7L3	-0.339764	0.248077	0.553724	1618.75	1511.23	2384.27	1329.12	2108	2760.45	4219.92	2186.46	1815.66	2547.23	1585.29	1986.49	1619.67	1912.12	2416.94
ENSG00000087157	PGS1	0.203548	0.523618	0.785134	892.496	743.551	778.156	740.318	644.085	880.914	2056.01	1156.04	874.252	736.526	864.98	586.525	839.989	737.171	897.89
ENSG00000087191	PSMC5	-0.135839	0.535099	0.792325	4254.98	4035.79	5758.36	3636.46	5237.12	4752.08	7669.07	4299.33	3691.54	4143.64	4300.79	4277.88	3722.7	4256.79	3964.85
ENSG00000087206	UIMC1	0.366133	0.182792	0.469952	489.281	503.378	451.775	917.09	423.172	342.837	491.36	531.896	436.547	394.375	460.117	743.54	347.009	387.298	403.155
ENSG00000087237	CETP	-2.58826	9.73043e-05	0.00228683	8.25293	13.1602	193.872	3.98735	22.5823	11.2099	12.5249	17.6644	17.3692	52.2231	6.02774	24.3119	13.9853	21.7583	8.95899
ENSG00000087245	MMP2	-3.21749	NA	NA	43.6227	208.37	86.2642	70.4432	58.9102	68.1938	29.867	10075.6	595.186	4699.18	218.003	25.3249	391.587	179.288	112.485
ENSG00000087250	MT3	2.38753	0.000660693	0.0101374	598.927	84.4446	42.6874	166.14	423.172	85.0087	515.446	164.868	136.638	37.8167	166.767	111.43	432.669	634.472	27.8724
ENSG00000087253	LPCAT2	0.270358	0.751831	0.905183	12.9689	63.6076	50.6913	43.8608	43.2008	32.6956	23.1228	424.928	94.9518	105.347	19.0878	23.2989	25.3483	79.2002	56.7403
ENSG00000087258	GNAO1	-0.893757	0.0116495	0.0853729	3726.79	3078.39	6511.61	3442.41	2426.12	4500.79	1459.63	1018.65	1938.41	3561.98	3283.11	1718.04	3313.63	2863.39	3108.77
ENSG00000087263	OGFOD1	1.11602	0.0232259	0.135906	1045.76	1118.62	705.232	3601.91	3113.41	748.263	2003.02	1007.85	742.246	635.682	1447.66	775.955	871.456	1779.83	606.225
ENSG00000087266	SH3BP2	0.790412	0.0373702	0.184623	932.582	227.013	500.688	455.887	752.087	275.578	533.752	847.893	999.31	426.789	629.898	808.371	916.034	846.833	373.291
ENSG00000087269	NOP14	0.840718	0.0243568	0.139985	624.865	788.515	626.972	1048.67	946.491	592.258	2498.23	1159.96	946.045	608.67	721.319	1818.33	749.959	852.925	938.703
ENSG00000087274	ADD1	0.104069	0.577696	0.817777	5370.3	3508.29	5641.86	5079.88	6209.14	5121.07	7397.38	6377.84	4902.76	5143.08	5731.37	7008.92	5598.47	5307.28	5889.04
ENSG00000087299	L2HGDH	0.60096	0.0913987	0.319424	426.795	588.919	412.645	446.583	488.955	373.664	1266.94	437.685	368.228	302.534	552.542	469.017	777.93	468.238	312.569
ENSG00000087301	TXNDC16	0.692138	0.0513871	0.227819	587.137	1263.38	449.107	451.9	464.409	298.932	790.994	463.201	364.754	296.231	538.478	578.421	507.84	335.948	403.155
ENSG00000087302	RTRAF	0.119631	0.693635	0.878071	1253.27	2819.57	1293.96	2591.78	1602.36	1410.58	1907.63	1452.41	1255.22	1697.25	1372.31	1353.36	935.264	1317.68	1271.18
ENSG00000087303	NID2	0.225666	0.803604	0.92624	11.7899	35.0939	47.134	49.1773	17.6731	28.0248	24.0863	492.641	122.743	165.673	52.2404	32.4159	167.823	41.7759	78.64
ENSG00000087338	GMCL1	0.685405	0.0245052	0.140582	641.371	638.27	455.333	509.052	1203.73	469.883	415.248	450.443	941.413	415.984	867.994	746.579	964.983	734.56	512.653
ENSG00000087365	SF3B2	-0.310187	0.0208357	0.126131	5410.39	5119.32	8331.16	5527.8	6504.67	6382.19	6816.42	4754.68	5494.47	6729.58	6494.88	5254.41	5739.2	5680.65	6379.8
ENSG00000087448	KLHL42	-0.0827007	0.648752	0.856126	1074.06	1017.72	1112.54	990.192	998.528	1236.83	1123.38	834.154	771.194	801.355	820.777	1343.23	1012.18	890.349	1024.31
ENSG00000087460	GNAS	-1.44469	0.000653506	0.0100686	117351	151690	412143	61474.3	74252.4	336577	318071	106681	95933.8	230119	125112	62435	94960.8	143849	86573.7
ENSG00000087470	DNM1L	0.0660248	0.801376	0.925136	2492.39	3086.07	2892.96	4096.34	2534.12	2679.17	2847.96	1803.73	1839.98	2557.13	3449.87	4422.74	2263.86	2435.19	2769.32
ENSG00000087495	PHACTR3	6.20518	4.6016e-15	2.02963e-12	6265.16	1820.49	68.4778	14418.3	15303.9	97.1528	14191.6	5900.9	2531.28	90.0399	6751.06	5298.99	569.899	1883.4	517.63
ENSG00000087502	ERGIC2	0.512482	0.0617971	0.254295	609.538	1515.62	564.719	942.344	937.654	541.813	753.419	733.074	754.983	561.849	633.917	537.901	609.233	645.786	848.118
ENSG00000087510	TFAP2C	5.18926	0.00540848	0.0498222	0	165.599	0.889322	147.532	0.981837	1.86832	9.63451	41.217	23.159	0	0	2.02599	0	2.61099	554.462
ENSG00000087586	AURKA	0.643881	0.233818	0.536816	74.2764	40.5773	51.5807	22.595	54.9829	39.2348	198.471	77.5272	35.8964	28.8128	69.319	41.5329	54.1929	42.6462	34.8405
ENSG00000087589	CASS4	-0.0689611	0.939762	0.978571	3.53697	26.3204	12.4505	18.6076	1.96367	8.40745	1.9269	45.1424	8.10565	16.2072	1.00462	8.10397	7.86671	6.09232	12.9408
ENSG00000087842	PIR	0.210833	0.627234	0.845015	319.506	233.594	208.101	215.317	206.186	188.701	613.719	324.829	122.743	250.311	267.23	167.144	166.949	95.7365	262.797
ENSG00000087884	AAMDC	-0.380984	0.215829	0.513731	446.837	264.301	337.942	132.912	329.897	390.479	230.265	386.655	226.958	394.375	321.479	225.898	414.313	256.748	211.034
ENSG00000087903	RFX2	0.125875	0.749119	0.903694	246.409	303.781	302.369	546.267	179.676	284.919	306.378	350.345	237.38	329.546	303.396	651.357	151.216	227.157	499.712
ENSG00000087995	METTL2A	0.321004	0.408834	0.702795	341.907	381.646	276.579	384.115	327.934	344.705	1103.15	488.716	262.854	345.753	273.257	294.782	315.542	357.706	299.628
ENSG00000088002	SULT2B1	0.667641	0.546225	0.798251	5.89495	1.09668	8.89322	9.30382	2.94551	12.1441	66.4781	64.7696	25.4749	10.8048	4.01849	14.182	3.49631	3.48133	0.995443
ENSG00000088035	ALG6	0.104317	0.686317	0.874366	156.806	93.2181	99.604	71.7723	139.421	125.178	150.298	157.017	106.531	100.845	113.522	85.0917	117.127	91.3848	116.467
ENSG00000088038	CNOT3	-0.0940282	0.716775	0.886931	1503.21	1492.59	2160.16	3265.64	1708.4	1735.67	1747.7	1259.08	1824.93	1644.13	1284.91	2039.16	1472.82	1427.34	1740.03
ENSG00000088179	PTPN4	0.418615	0.310358	0.620738	631.939	558.212	538.04	345.57	893.472	447.463	253.388	411.189	550.026	459.203	853.929	496.368	1457.96	794.613	475.822
ENSG00000088205	DDX18	0.209463	0.328291	0.638146	578.884	594.402	545.154	523.672	608.739	516.591	481.726	975.469	773.51	543.841	599.76	461.926	499.099	653.619	674.911
ENSG00000088247	KHSRP	-0.389857	0.069951	0.272926	4049.83	4217.84	6632.56	7368.62	4324.01	5358.35	4924.2	3929.35	3627.86	4955.79	3329.32	4344.74	4047.86	3791.16	3784.68
ENSG00000088256	GNA11	-0.0265454	0.906013	0.96624	2010.18	2215.3	2532.79	4326.27	2667.65	2881.89	2490.52	2782.15	2297.37	2256.4	1790.24	2110.07	2404.59	2623.18	2409.97
ENSG00000088280	ASAP3	-0.397885	0.562271	0.8088	406.752	65.801	1747.52	1382.28	652.922	565.168	617.572	1120.71	834.881	691.506	1039.78	114.469	722.863	1798.98	363.337
ENSG00000088298	EDEM2	0.0142063	0.953899	0.982708	557.663	773.162	579.838	560.887	959.255	643.637	716.808	405.301	634.556	587.06	540.487	419.381	451.024	678.859	616.179
ENSG00000088305	DNMT3B	0.425262	0.337118	0.646244	50.6966	25.2237	37.3515	9.30382	32.4006	40.1689	52.0264	52.0119	62.5293	33.3148	55.2542	82.0527	68.1781	50.4792	53.7539
ENSG00000088320	REM1	-0.42457	0.702997	0.880979	3.53697	3.29005	8.00389	3.98735	9.81837	12.1441	0.963451	124.632	45.16	87.3387	6.02774	8.10397	46.3262	17.4066	50.7676
ENSG00000088325	TPX2	0.799492	0.253992	0.560516	192.175	132.699	152.963	47.8482	67.7468	27.0907	434.517	141.315	94.9518	67.5299	237.091	61.7928	221.142	71.3672	20.9043
ENSG00000088340	FER1L4	-2.91755	8.33542e-05	0.00203467	16.5059	8.77347	550.49	17.2785	20.6186	197.108	54.9167	143.278	38.2123	249.41	18.0832	12.156	20.1038	83.5518	93.5717
ENSG00000088356	PDRG1	-0.143272	0.57852	0.818121	501.071	708.457	541.597	467.849	488.955	643.637	810.263	524.045	415.704	586.16	361.664	620.967	465.01	344.651	706.765
ENSG00000088367	EPB41L1	0.135375	0.764504	0.911235	2820.15	1846.81	1655.92	358.861	1959.75	1340.52	724.515	1112.86	1105.84	1386.61	1769.14	1210.53	2845.13	1832.05	1670.35
ENSG00000088387	DOCK9	0.310717	0.296388	0.606657	870.095	778.645	1066.3	2211.65	1391.26	979.001	931.657	1551.53	1104.68	931.913	1194.5	1391.86	1587.33	926.033	833.186
ENSG00000088448	ANKRD10	0.191471	0.674769	0.868817	1055.2	1011.14	1318.86	2385.76	1374.57	1551.64	691.758	1303.24	1961.57	1248.85	1044.81	4474.41	1256.92	921.681	1335.88
ENSG00000088451	TGDS	0.384549	0.136912	0.402275	132.047	223.723	117.39	229.937	157.094	156.939	219.667	181.551	195.693	144.064	175.809	268.444	140.727	119.235	142.348
ENSG00000088538	DOCK3	-0.052802	0.867309	0.953211	1322.83	1039.66	1450.48	766.9	1068.24	825.798	757.273	402.356	830.25	689.705	939.322	871.177	1429.12	1077.47	932.73
ENSG00000088543	C3orf18	-0.923319	0.00881352	0.0700869	736.869	205.08	995.151	256.52	584.193	855.692	292.889	366.046	429.599	879.69	543.501	433.563	689.648	557.012	662.965
ENSG00000088682	COQ9	-0.680501	0.00254216	0.0284619	1379.42	1013.34	2065	1567.03	994.601	1672.15	842.056	696.764	1245.95	1512.67	1015.67	982.607	1346.95	948.661	1073.09
ENSG00000088727	KIF9	0.0312077	0.917214	0.970481	185.102	81.1546	154.742	101.013	228.768	194.306	247.607	176.644	163.271	169.275	199.92	150.936	150.341	196.695	234.925
ENSG00000088756	ARHGAP28	-1.74791	0.0728431	0.279607	86.0663	9.87015	81.8176	10.6329	3.92735	113.034	196.544	160.943	12.7374	121.554	7.03236	2.02599	10.4889	15.666	17.918
ENSG00000088766	CRLS1	-0.175041	0.427742	0.718919	328.938	515.441	366.4	366.836	331.861	397.953	353.587	392.543	374.018	362.861	236.086	298.834	278.831	274.154	244.879
ENSG00000088808	PPP1R13B	0.084723	0.821838	0.934914	883.064	539.568	1355.33	2089.37	738.342	851.955	1780.46	1098.14	871.936	822.964	835.846	1472.9	1062.88	803.316	679.888
ENSG00000088812	ATRN	0.326182	0.276784	0.586371	2438.15	4512.85	2193.07	1531.14	2317.14	2139.23	4393.34	2261.05	2253.37	2153.75	3025.92	1701.83	3159.79	2586.63	2343.27
ENSG00000088826	SMOX	2.35505	4.04898e-06	0.000174529	877.169	329.005	110.276	1568.36	1303.88	189.635	1949.06	1105.01	919.412	274.622	702.231	564.239	647.692	1527.43	263.792
ENSG00000088827	SIGLEC1	-1.99487	0.0918514	0.319856	5.89495	122.829	197.429	3.98735	5.89102	17.7491	15.4152	228.656	8.10565	315.14	1.00462	6.07798	10.4889	40.0352	83.6172
ENSG00000088832	FKBP1A	-0.47998	0.255426	0.562518	3059.48	7653.75	3522.6	2679.5	2528.23	3378.86	2911.55	3897.95	1536.6	4924.28	1579.27	2286.33	2124.88	1698.89	1960.03
ENSG00000088833	NSFL1C	0.397162	0.0461656	0.212811	2203.53	2478.5	1392.68	2077.41	1761.42	1540.43	2679.36	1869.49	1438.17	1536.98	2280.49	1604.59	1905.49	1823.34	1425.47
ENSG00000088836	SLC4A11	1.50943	0.0633792	0.258453	3.53697	12.0635	15.1185	11.962	110.948	10.2758	26.9766	131.502	32.4226	17.1076	25.1156	14.182	59.4373	24.3693	30.8587
ENSG00000088854	C20orf194	0.480736	0.0651658	0.262239	1051.66	808.255	737.248	445.254	899.363	666.991	1160	995.096	1149.84	636.582	1191.48	627.045	1060.26	1148.84	852.099
ENSG00000088876	ZNF343	0.642032	0.00170105	0.0207875	236.977	257.721	140.513	184.747	316.152	178.425	371.892	307.165	291.803	217.897	231.063	295.795	300.683	278.506	274.742
ENSG00000088881	EBF4	2.34539	0.000853791	0.0122308	1145.98	193.016	46.2447	21.2659	280.805	80.3379	243.753	462.219	998.152	156.669	424.955	438.628	567.277	766.762	215.016
ENSG00000088882	CPXM1	-0.464849	NA	NA	1.17899	7.67678	4.44661	1.32912	0	0	1.9269	1042.2	99.5836	44.1195	2.00925	2.02599	12.2371	5.22199	3.98177
ENSG00000088888	MAVS	0.207668	0.449453	0.734287	1773.2	1718.5	2153.94	1654.75	2813.95	2337.27	4684.3	2684.01	2408.53	1896.24	2451.28	1977.37	2357.39	2658.86	2320.38
ENSG00000088899	LZTS3	-0.823321	0.126992	0.387162	975.025	255.527	3093.06	918.42	3022.09	3509.64	3690.98	1376.84	1706.82	2602.15	2225.24	749.618	1914.23	2603.16	1368.73
ENSG00000088930	XRN2	0.394283	0.0348596	0.177299	1074.06	1534.26	1139.22	1006.14	1487.48	863.165	1679.3	1144.26	1075.73	869.785	1259.8	1092.01	1463.21	1188.87	1092
ENSG00000088970	KIZ	0.0258726	0.912376	0.968186	1127.11	990.305	999.597	1327.79	1029.95	822.062	646.476	570.169	875.41	879.69	1128.19	923.853	825.13	714.542	846.127
ENSG00000088986	DYNLL1	0.344345	0.325024	0.635047	5952.72	8817.33	3658.67	12246.5	5383.41	4289.67	4166.93	3587.84	3947.45	5439.31	4234.48	6111.41	3924.61	4611.02	5006.08
ENSG00000088992	TESC	1.89349	0.000273402	0.00510369	491.639	1051.72	171.639	539.621	342.661	51.3789	212.923	283.612	246.643	122.454	279.285	463.952	711.5	383.816	128.412
ENSG00000089006	SNX5	-0.111741	0.623571	0.842999	729.795	911.344	567.387	505.064	856.162	911.741	730.296	1040.24	720.244	898.598	685.153	542.966	807.648	665.804	605.229
ENSG00000089009	RPL6	0.317505	0.35992	0.662935	16713.4	41849.4	11622.5	31954.6	22413.4	18022.8	15007.7	15007.9	15686.7	18715.7	16970.1	22425.7	13039.5	14253.4	15744.9
ENSG00000089022	MAPKAPK5	0.0178088	0.933122	0.976069	627.223	747.938	639.422	1120.45	657.831	709.028	772.688	732.092	591.712	706.813	529.436	797.228	572.521	629.25	548.489
ENSG00000089041	P2RX7	1.72052	0.00268603	0.0296699	338.37	273.074	39.1301	98.3546	31.4188	59.7863	240.863	304.221	242.011	72.0319	119.55	205.638	176.564	183.64	39.8177
ENSG00000089048	ESF1	0.13975	0.599577	0.829705	380.814	723.811	426.874	479.811	714.777	530.604	859.399	735.037	603.292	578.056	449.066	388.991	456.269	511.755	462.881
ENSG00000089050	RBBP9	-1.04625	0.0171236	0.110993	248.767	284.041	565.609	91.709	251.35	581.982	444.151	371.934	169.061	640.184	465.14	91.1697	263.972	385.557	394.196
ENSG00000089053	ANAPC5	0.0939911	0.712389	0.884989	2980.49	3694.73	3614.2	5341.72	2960.24	2516.63	3315.24	2603.54	2634.33	2404.06	2288.53	3377.33	2466.65	2275.92	2503.54
ENSG00000089057	SLC23A2	-0.348719	0.324522	0.634851	2646.83	4929.59	6509.83	2014.94	2145.31	2679.17	3089.79	2192.35	2233.68	1962.87	2817.97	2860.7	4527.73	2364.69	3205.33
ENSG00000089060	SLC8B1	0.13591	0.790389	0.921403	132.047	76.7678	186.758	182.089	130.584	74.7329	160.896	486.753	191.062	202.59	188.869	54.7018	135.482	194.954	105.517
ENSG00000089063	TMEM230	-0.0418121	0.867414	0.953211	2660.98	4710.25	2770.24	2299.37	3019.15	2946.34	4617.82	2949.96	2439.8	3383.7	2787.83	2583.14	2281.34	2158.42	2852.94
ENSG00000089091	DZANK1	-0.0505557	0.887023	0.960836	265.273	138.182	417.092	297.722	401.571	312.944	369.002	262.022	289.487	224.199	375.729	213.742	239.497	604.01	227.956
ENSG00000089094	KDM2B	0.013531	0.949891	0.981527	543.515	524.215	662.545	636.647	466.373	551.155	494.251	641.808	456.232	561.849	516.376	947.152	708.004	670.155	563.421
ENSG00000089101	CFAP61	0.727975	0.104752	0.346065	475.133	305.975	180.532	400.064	578.302	227.935	503.885	197.253	504.866	259.315	481.214	142.833	90.0301	375.113	370.305
ENSG00000089123	TASP1	-0.618724	0.00926229	0.0725678	208.681	347.649	470.451	223.292	378.007	443.727	409.467	319.922	281.382	448.399	213.985	304.912	235.127	238.471	387.227
ENSG00000089127	OAS1	-1.96122	0.0334045	0.172629	9.43192	36.1905	399.305	77.0888	35.3461	248.487	98.272	339.55	68.319	967.929	24.1109	66.8578	44.578	162.752	696.81
ENSG00000089154	GCN1	0.0271925	0.919302	0.970989	2115.11	3271.41	4409.26	4372.79	2232.7	2327	3876.93	2668.31	3243.42	2224.89	2233.28	3906.12	2658.95	2943.46	3006.24
ENSG00000089157	RPLP0	0.407366	0.152159	0.425923	13897.9	23764	7939.86	14914	18206.2	10659.7	14921	18317	12554.5	13656.3	11638.6	14092.8	9793.17	9970.52	9050.57
ENSG00000089159	PXN	-0.775703	0.165482	0.44493	613.075	212.757	1801.77	318.988	2092.29	1439.54	420.065	1551.53	1281.85	1262.36	868.998	491.303	1181.75	1096.62	392.205
ENSG00000089163	SIRT4	0.403988	0.50849	0.77558	15.3269	26.3204	8.89322	1.32912	10.8002	16.8149	27.9401	19.6271	30.1067	11.7052	17.0786	13.169	20.1038	7.83298	7.96355
ENSG00000089169	RPH3A	-3.73983	0.000331858	0.00598291	2.35798	3.29005	210.769	6.64558	2.94551	11.2099	7.70761	1.96271	2.3159	3.6016	0	6.07798	4.37039	23.499	5.97266
ENSG00000089177	KIF16B	-0.0595793	0.858706	0.94991	190.996	247.85	321.045	198.038	334.806	233.54	449.932	425.909	231.59	380.869	368.696	153.975	263.972	274.154	448.945
ENSG00000089195	TRMT6	0.241663	0.48774	0.760229	330.117	631.689	381.519	677.849	428.081	359.652	937.438	421.002	328.858	472.709	333.535	282.626	321.661	446.48	602.243
ENSG00000089199	CHGB	-0.36631	0.599441	0.829695	48225.4	51359.9	30506.4	21498.5	21502.2	67368.9	13283.1	6557.43	24952.6	62917.2	25932.3	25433.3	32525.3	36717.5	190958
ENSG00000089220	PEBP1	0.0104434	0.968886	0.988701	12085.8	14741.6	12120.6	19996.6	14244.5	14947.5	10413	7213.96	10404.2	11662	15439	17990.8	13211.7	9927	10379.5
ENSG00000089234	BRAP	0.344223	0.253489	0.559747	548.231	895.99	545.154	1233.42	574.375	548.353	905.644	586.852	440.021	501.522	567.612	791.15	562.907	581.381	414.104
ENSG00000089248	ERP29	-0.0805638	0.804669	0.926957	3788.1	6897.04	3076.16	5082.54	3793.82	4769.83	3242.98	2202.17	3056.99	5165.59	4499.7	3900.04	3651.03	2534.41	6571.92
ENSG00000089250	NOS1	-0.237285	0.798138	0.924502	366.666	23.0303	1503.84	1100.51	1872.36	1027.58	98.272	181.551	465.496	587.96	1878.64	1247	1609.18	1696.28	45.7904
ENSG00000089280	FUS	0.0518283	0.88772	0.961206	9523.89	7971.79	10461.1	21442.6	5010.31	7988.01	4936.72	7356.25	8161.23	7404.88	6739.01	11895.6	7786.29	8412.62	7965.54
ENSG00000089289	IGBP1	0.424014	0.119867	0.374776	1549.19	1739.34	893.768	2537.28	1335.3	1060.27	1156.14	1008.84	1074.58	1131.8	1612.42	1059.59	1314.61	1192.35	984.493
ENSG00000089327	FXYD5	2.10827	0.0114557	0.0843764	1533.87	358.615	77.371	126.266	866.962	62.5888	65.5147	960.749	1322.38	502.423	1983.12	526.758	1950.94	1237.61	146.33
ENSG00000089335	ZNF302	0.164709	0.546732	0.798377	549.41	1152.61	710.568	1365	649.976	797.774	579.998	841.023	941.413	750.933	859.957	1057.57	852.226	690.173	593.284
ENSG00000089351	GRAMD1A	-0.190114	0.401552	0.696019	2122.18	1290.8	1919.16	1719.88	1505.16	1901.95	787.14	1626.11	1607.23	1466.75	1834.44	1468.85	1612.67	1398.62	1568.82
ENSG00000089356	FXYD3	4.3641	0.00038387	0.00672872	249.946	6.5801	35.5729	33.2279	187.531	31.7615	2.89035	318.941	548.868	22.51	3685.96	30.3899	313.794	1575.3	446.954
ENSG00000089472	HEPH	-0.179058	0.853446	0.947685	27.1168	13.1602	34.6835	18.6076	16.6912	21.4857	22.1594	491.66	127.374	236.805	49.2265	26.3379	98.7709	73.9782	69.681
ENSG00000089486	CDIP1	-0.173473	0.585726	0.822454	4048.65	3136.51	3310.05	3814.56	2586.16	3402.22	1256.34	1429.84	2802.24	2842.56	3836.65	2365.35	2505.11	3569.23	2540.37
ENSG00000089505	CMTM1	-0.00208076	0.996016	0.997647	43.6227	77.8645	40.0195	19.9367	19.6367	36.4323	26.9766	36.3102	38.2123	31.514	28.1294	24.3119	55.941	31.3319	28.8679
ENSG00000089558	KCNH4	1.42266	0.0895003	0.316927	8.25293	6.5801	4.44661	5.31647	12.7639	9.34161	46.2457	16.6831	15.0533	1.8008	6.02774	7.09098	10.4889	29.5913	1.99089
ENSG00000089597	GANAB	0.230228	0.264182	0.571972	5731.07	8880.94	6580.09	9368.94	6127.65	6091.67	11844.7	6769.4	7203.6	6643.14	7563.8	7229.76	6323.08	6738.98	6846.66
ENSG00000089639	GMIP	-0.220219	0.598603	0.829238	91.9613	100.895	228.556	79.747	190.476	126.112	205.215	281.65	141.27	198.988	144.666	64.8318	241.246	222.805	134.385
ENSG00000089682	RBM41	0.322963	0.270216	0.579087	115.541	72.3811	138.734	134.241	144.33	102.758	250.497	160.943	127.374	105.347	179.827	116.495	163.453	129.679	139.362
ENSG00000089685	BIRC5	1.75169	0.0273683	0.15213	147.374	80.0579	67.5884	25.2532	53.0192	18.6832	512.556	187.439	67.1611	29.7132	195.901	54.7018	178.312	43.5166	16.9225
ENSG00000089692	LAG3	-0.502277	0.615301	0.83889	2.35798	125.022	41.7981	2.65823	2.94551	47.6422	20.2325	52.9933	23.159	37.8167	6.02774	12.156	5.24447	27.8506	78.64
ENSG00000089693	MLF2	-0.186673	0.49005	0.761889	6176.73	8434.59	6118.53	9905.91	6547.87	7630.23	5573.57	3772.34	4041.24	6734.08	5032.15	7099.08	5107.24	4558.8	5740.72
ENSG00000089723	OTUB2	0.0769827	0.9033	0.965527	48.3386	42.7706	68.4778	18.6076	74.6196	56.0497	121.395	41.217	19.6851	21.6096	21.0971	20.2599	124.119	58.3122	24.8861
ENSG00000089737	DDX24	0.710119	0.0595956	0.248853	9008.67	9735.26	5867.74	27992.5	9586.66	6784.81	11157.7	5729.16	7779.1	6917.76	10887.1	12127.6	8337.83	8920.9	6803.85
ENSG00000089775	ZBTB25	0.260781	0.31687	0.627586	430.332	454.027	478.455	899.812	662.74	487.632	626.243	432.779	430.757	337.65	430.983	585.512	490.358	389.909	417.091
ENSG00000089818	NECAP1	0.0752386	0.776945	0.915162	3856.48	4640.07	2706.21	5044	2973.98	3720.76	3703.51	1884.21	2156.1	3183.81	3087.21	3860.53	3014.7	2954.78	3327.77
ENSG00000089820	ARHGAP4	0.107464	0.845582	0.94423	173.312	276.364	403.752	1166.96	777.615	290.524	147.408	790.974	430.757	511.427	298.373	302.886	206.283	281.987	344.423
ENSG00000089847	ANKRD24	-1.92965	0.00114283	0.0152963	1174.27	547.245	6483.15	1104.5	327.934	665.123	368.038	351.326	837.197	1174.12	642.958	1306.77	710.626	1077.47	290.669
ENSG00000089876	DHX32	0.0595701	0.777844	0.915571	318.327	159.019	251.678	195.38	305.351	270.907	266.876	333.661	303.383	239.506	243.119	251.223	255.231	305.486	237.911
ENSG00000089902	RCOR1	-0.147101	0.694654	0.878789	587.137	1090.1	659.877	575.508	387.826	713.699	1278.5	627.087	376.334	638.383	356.641	595.642	517.454	397.742	477.813
ENSG00000089916	GPATCH2L	0.42773	0.181736	0.468605	713.289	868.573	869.757	1302.53	702.995	630.559	1952.92	970.562	591.712	571.753	723.328	877.255	829.5	755.448	861.058
ENSG00000090006	LTBP4	0.947645	0.11677	0.369207	2212.97	3146.38	1045.84	3487.6	1856.65	608.139	2362.38	10027.5	2335.58	2821.85	831.827	2598.34	1712.32	3037.46	921.78
ENSG00000090013	BLVRB	0.117718	0.820229	0.934224	264.094	257.721	167.192	118.291	472.264	261.565	665.745	853.781	331.174	571.753	406.872	158.027	312.92	237.601	262.797
ENSG00000090020	SLC9A1	0.507258	0.149263	0.421613	927.866	1005.66	1025.39	838.673	1302.9	379.269	1096.41	1053	969.204	652.789	547.519	752.657	765.693	1844.23	593.284
ENSG00000090054	SPTLC1	0.632054	0.153788	0.427863	857.126	3077.29	762.149	1823.55	482.082	770.683	1557.9	975.469	832.566	703.211	966.447	912.71	898.553	713.672	765.496
ENSG00000090060	PAPOLA	0.454575	0.123988	0.382428	3554.66	5304.66	3485.25	7797.93	3991.17	2998.66	6269.18	3617.28	2569.49	3017.24	4048.63	4779.32	2928.16	3845.12	3377.54
ENSG00000090061	CCNK	0.585475	0.134259	0.398673	363.129	784.128	356.618	1116.46	320.079	334.43	769.798	391.562	264.012	327.745	344.586	505.485	407.321	455.183	395.191
ENSG00000090097	PCBP4	-0.919595	0.0303298	0.16245	1314.57	216.047	2336.25	457.216	1206.68	1303.15	471.128	992.152	1233.22	1196.63	870.003	846.865	867.086	1009.58	741.605
ENSG00000090104	RGS1	-0.184861	0.833383	0.939767	71.9184	116.248	470.451	244.557	39.2735	50.4447	52.9898	361.139	214.221	53.1235	67.3097	96.2347	30.5927	40.0352	685.86
ENSG00000090238	YPEL3	0.846426	0.0104977	0.0794176	3959.05	2274.52	1073.41	1428.8	3022.09	1488.12	1649.43	2226.7	3578.06	1320.89	1830.42	2515.27	2201.8	2139.27	1097.97
ENSG00000090263	MRPS33	0.509097	0.162264	0.440904	1262.7	2527.85	666.102	2385.76	1260.68	1115.39	1791.06	814.526	823.302	1033.66	1067.91	1037.31	1047.15	987.826	1021.32
ENSG00000090266	NDUFB2	-0.316759	0.319643	0.630313	2313.18	4236.49	2113.03	3713.55	1762.4	3715.16	2720.79	1754.67	1707.98	2896.58	2244.33	1623.83	1795.36	1696.28	2452.77
ENSG00000090273	NUDC	0.0452825	0.782255	0.917515	3521.64	2719.77	3033.48	4274.44	3840.95	3107.02	3239.12	2850.84	2974.77	3129.79	3121.36	2935.66	2428.19	3541.38	2819.1
ENSG00000090316	MAEA	0.00354945	0.98899	0.994876	2656.27	2036.54	2594.15	2626.33	2308.3	2364.36	2696.7	1907.76	2495.38	2124.94	2328.72	4212.04	1879.27	1648.41	1609.63
ENSG00000090339	ICAM1	-0.357293	0.693638	0.878071	11.7899	21.9337	50.6913	21.2659	29.4551	27.0907	18.3056	384.692	69.477	176.478	31.1433	18.2339	43.7039	46.9979	96.558
ENSG00000090372	STRN4	0.158282	0.579462	0.819032	2366.23	2196.66	2458.97	4320.96	1727.05	1749.68	2871.09	2316	1877.04	1949.36	1322.08	2515.27	1798.85	1988.71	2191.97
ENSG00000090376	IRAK3	3.54143	8.2892e-09	9.82581e-07	372.561	284.041	27.569	1035.38	713.796	20.5515	506.775	501.474	418.02	87.3387	418.928	985.646	492.98	541.346	39.8177
ENSG00000090382	LYZ	0.429456	0.709427	0.883234	18.8638	2205.43	224.998	51.8355	37.3098	54.1813	73.2223	6105.02	115.795	275.522	38.1757	21.2729	108.386	54.8309	165.244
ENSG00000090432	MUL1	0.370863	0.0937506	0.323813	1029.26	1439.94	920.448	1771.71	1008.35	973.396	1745.77	1126.6	1089.63	911.204	883.063	1041.36	1100.46	1012.2	1263.22
ENSG00000090447	TFAP4	-0.0324911	0.946919	0.980779	416.184	222.627	126.284	180.76	287.678	615.612	178.238	290.482	773.51	406.08	271.248	721.254	412.565	366.41	368.314
ENSG00000090470	PDCD7	0.266976	0.163669	0.442816	623.686	572.469	442.882	806.774	694.159	493.237	417.174	414.133	584.764	553.745	648.986	638.188	588.255	590.085	595.275
ENSG00000090487	SPG21	-0.968208	1.28079e-05	0.000464657	584.779	697.49	1009.38	677.849	865.98	1316.23	453.786	645.733	619.503	1414.53	747.439	388.991	548.921	649.267	767.487
ENSG00000090520	DNAJB11	0.936215	0.000543558	0.00874396	1294.53	622.916	621.636	879.875	1135	365.257	1176.37	881.259	1390.7	537.538	1008.64	629.071	708.878	1097.49	845.131
ENSG00000090530	P3H2	-0.394235	0.519715	0.781853	453.911	191.92	233.892	231.266	164.949	181.227	26.0132	486.753	228.116	358.359	116.536	66.8578	121.497	148.827	118.458
ENSG00000090539	CHRD	-0.316687	0.76389	0.910808	7.07394	5.48342	46.2447	7.9747	30.437	27.0907	9.63451	435.723	137.796	222.398	36.1664	32.4159	91.7782	43.5166	111.49
ENSG00000090554	FLT3LG	-0.000552111	0.999347	0.999663	27.1168	2.19337	24.901	41.2026	23.5641	23.354	3.85381	64.7696	37.0544	36.9164	17.0786	19.2469	27.9705	41.7759	34.8405
ENSG00000090565	RAB11FIP3	-0.446093	0.117469	0.370271	2840.19	2468.63	3768.94	3718.87	1627.89	2708.13	1249.6	1777.24	1908.3	2254.6	1664.66	2347.11	1940.45	1898.19	2199.93
ENSG00000090581	GNPTG	0.0508558	0.855344	0.948658	2679.85	3750.66	1979.63	4336.91	2898.38	2671.7	1634.98	1658.49	2923.82	2986.62	2523.61	2386.62	2325.92	2042.67	2489.6
ENSG00000090612	ZNF268	0.499901	0.0543339	0.235704	426.795	724.908	358.397	863.926	436.918	457.739	659.964	515.213	453.916	396.175	524.413	850.917	507.84	447.35	446.954
ENSG00000090615	GOLGA3	0.0523477	0.84725	0.94473	2006.64	3859.23	3221.12	4690.45	3559.16	2724.95	2418.26	1948.98	2090.1	2395.96	2950.58	3427.98	2839.88	2638.85	2173.05
ENSG00000090621	PABPC4	-0.0949375	0.667457	0.865556	1272.13	1895.07	1272.62	1368.99	1155.62	1349.86	1391.22	1981.36	1108.16	1730.57	1199.52	922.84	1189.62	1456.93	1361.77
ENSG00000090659	CD209	-1.08667	0.338486	0.647018	25.9378	594.402	303.259	5.31647	25.5278	8.40745	16.3787	52.9933	22.001	189.984	4.01849	24.3119	52.4447	74.8485	46.7858
ENSG00000090661	CERS4	0.900635	0.0210533	0.127124	1320.47	2524.56	479.344	1043.36	1018.17	774.42	695.612	545.635	1361.75	741.929	1808.32	1097.08	1728.05	1010.45	749.569
ENSG00000090674	MCOLN1	0.310779	0.159632	0.437195	1174.27	1263.38	1087.64	1387.6	2111.93	1250.84	1396.04	932.289	1632.71	1028.26	1354.23	1026.17	1757.77	1380.35	1286.11
ENSG00000090686	USP48	-0.191152	0.148133	0.420772	1604.61	1421.3	2154.83	1649.43	1500.25	1777.71	1584.88	1361.14	1403.43	1444.24	1637.53	1474.92	1802.35	1677.13	1720.13
ENSG00000090776	EFNB1	-0.185767	0.742128	0.900472	321.864	248.947	509.581	229.937	180.658	99.9552	192.69	1126.6	548.868	608.67	232.068	212.729	395.083	308.968	285.692
ENSG00000090857	PDPR	-0.0197837	0.949037	0.981527	470.417	704.071	608.296	673.862	387.826	790.3	414.284	703.633	1178.79	498.821	546.515	583.486	666.922	744.133	413.109
ENSG00000090861	AARS	0.0771394	0.688508	0.875334	4990.67	4572.07	4290.09	5880.01	4925.88	4228.95	4256.53	2521.11	4700.12	4254.38	4781	4100.61	4024.26	4952.19	4198.78
ENSG00000090863	GLG1	0.0252728	0.927963	0.97376	4181.88	7907.09	4307.87	6504.7	3614.14	4476.5	2324.81	3979.4	4308.73	4828.84	3821.58	4159.36	5158.81	4480.47	4976.22
ENSG00000090889	KIF4A	0.587372	0.242665	0.547382	64.8445	35.0939	44.4661	54.4938	24.5459	22.4199	154.152	51.0306	26.6328	43.2191	67.3097	35.4549	57.6892	35.6836	54.7494
ENSG00000090905	TNRC6A	-0.132279	0.593199	0.826461	1654.12	2988.46	2627.06	2436.27	1586.65	2483	1220.69	1602.56	2241.79	1804.4	2196.1	2255.94	2351.27	2060.95	2640.91
ENSG00000090924	PLEKHG2	0.427517	0.540043	0.795762	84.8873	64.7043	128.062	66.4558	90.329	66.3254	88.6375	794.899	294.119	285.426	134.619	118.521	312.92	284.598	245.874
ENSG00000090932	DLL3	2.88837	0.0025667	0.0286859	670.846	100.895	17.7864	101.013	20.6186	75.6671	296.743	105.005	646.136	14.4064	60.2774	939.048	117.127	120.106	15.9271
ENSG00000090971	NAT14	-0.624618	0.146104	0.417697	3863.55	2838.22	3508.37	2254.18	1805.6	3441.45	765.944	814.526	1595.65	2225.79	1148.28	1763.63	1399.4	2829.45	2727.51
ENSG00000090975	PITPNM2	1.82439	0.0338475	0.174018	9543.93	1432.27	2405.61	1520.51	3580.76	69.1279	457.639	1688.92	2838.13	171.076	3196.71	2938.7	2930.79	6913.91	439.986
ENSG00000090989	EXOC1	-0.0466478	0.799651	0.924713	562.378	586.725	797.721	746.964	542.956	653.913	981.757	745.831	668.137	705.012	743.421	839.774	592.625	688.432	653.011
ENSG00000091009	RBM27	0.0647403	0.775798	0.91511	278.242	372.872	369.068	578.166	320.079	332.561	415.248	371.934	305.699	339.45	274.262	463.952	291.942	375.113	310.578
ENSG00000091039	OSBPL8	-0.11665	0.757359	0.907616	475.133	1481.62	960.467	1411.52	672.558	766.012	788.103	1096.18	367.07	894.096	846.897	591.59	583.884	537.865	817.259
ENSG00000091073	DTX2	-0.15703	0.681756	0.871988	120.257	196.306	162.746	409.368	150.221	215.791	124.285	163.887	172.534	197.187	90.416	102.313	131.986	186.251	219.993
ENSG00000091106	NLRC4	0.0302963	0.947434	0.980855	14.1479	28.5138	25.7903	51.8355	14.7276	26.1565	11.5614	31.4034	28.9487	20.7092	14.0647	16.2079	24.4742	24.3693	37.8268
ENSG00000091127	PUS7	0.583494	0.185309	0.473982	124.973	156.826	152.963	178.102	157.094	63.523	350.696	248.283	121.585	100.845	108.499	132.703	138.978	135.772	48.7767
ENSG00000091129	NRCAM	-0.0134438	0.980816	0.992848	3222.18	13932.3	5210.54	3753.43	1996.07	3557.29	2266.04	1150.15	2489.59	2454.49	2564.8	2978.21	4604.65	3259.39	2256.67
ENSG00000091136	LAMB1	0.35775	0.604645	0.832863	201.607	597.692	920.448	2115.95	551.792	539.011	2301.69	3371.94	675.084	1078.68	293.35	632.11	582.136	1293.31	393.2
ENSG00000091137	SLC26A4	-2.56605	0.00704996	0.0599863	15.3269	4.38673	22.233	37.2153	3.92735	201.779	9.63451	40.2356	5.78975	36.9164	2.00925	10.13	3.49631	1.74066	42.8041
ENSG00000091140	DLD	-0.0923374	0.780935	0.917198	1134.19	2181.3	2045.44	3409.18	2036.33	1630.11	2338.3	1272.82	1029.42	1735.97	1373.32	1250.04	1292.76	1500.45	1488.19
ENSG00000091157	WDR7	0.106595	0.70917	0.883191	1100	1023.21	1070.74	727.027	1308.79	1136.87	1354.61	740.925	914.78	1005.75	1668.68	655.409	1391.53	1530.91	1420.5
ENSG00000091164	TXNL1	-0.105909	0.58718	0.823155	1914.68	1921.39	1536.75	1774.37	1887.09	1831.89	1529.96	1156.04	1175.32	1793.59	1996.18	1522.53	1648.51	1330.74	1331.9
ENSG00000091181	IL5RA	1.67016	0.00584357	0.0527256	787.566	590.016	16.0078	194.051	245.459	168.149	462.457	259.078	496.76	210.693	473.177	570.317	520.951	80.9408	345.419
ENSG00000091262	ABCC6	0.244367	0.70416	0.881343	68.3815	12.0635	27.569	21.2659	25.5278	22.4199	18.3056	97.1544	25.4749	28.8128	11.0508	14.182	16.6075	43.5166	19.9089
ENSG00000091317	CMTM6	-0.280163	0.291445	0.600892	436.227	830.189	536.261	587.47	545.901	927.622	702.356	1009.82	663.505	902.2	572.635	621.98	419.558	609.232	794.364
ENSG00000091409	ITGA6	0.791311	0.373327	0.674464	406.752	105.282	805.725	7209.13	266.078	609.073	155.116	1406.28	612.555	668.096	1279.89	426.472	607.485	945.18	1000.42
ENSG00000091428	RAPGEF4	-0.986281	0.0216783	0.130111	937.297	378.356	1157.01	409.368	277.86	940.7	184.983	686.95	402.966	826.566	749.448	187.404	573.395	583.992	532.562
ENSG00000091436	MAP3K20	-0.792176	0.327068	0.637287	249.946	64.7043	445.55	766.9	93.2745	999.552	69.3685	1036.31	576.659	1342.49	674.102	79.0137	1020.92	402.093	1405.57
ENSG00000091482	SMPX	-0.846572	0.506168	0.774122	0	2.19337	1.77864	231.266	6.87286	0.934161	0	6.8695	1.15795	8.10359	1.00462	0	0.874078	2.61099	0.995443
ENSG00000091483	FH	-0.229093	0.250787	0.557089	1180.17	1001.27	1361.55	927.723	1099.66	1028.51	1181.19	734.055	811.722	1099.39	1161.34	657.435	954.494	1022.64	1176.61
ENSG00000091490	SEL1L3	0.0529701	0.927803	0.9737	466.88	700.781	526.478	692.47	206.186	53.2472	501.958	579.001	262.854	590.662	376.733	403.173	394.209	139.253	134.385
ENSG00000091513	TF	-2.18513	NA	NA	89.6033	19.7403	11.5612	33.2279	4.90919	32.6956	14.4518	1168.8	45.16	431.291	23.1063	54.7018	22.726	40.9056	36.8314
ENSG00000091527	CDV3	0.161394	0.446579	0.732168	2260.12	1847.91	1557.2	1620.19	2605.8	2112.14	2047.33	2355.26	1780.93	1829.61	2042.4	1361.47	1600.44	2671.92	2403
ENSG00000091536	MYO15A	0.395015	0.61646	0.839263	1789.71	25.2237	252.567	166.14	170.84	259.697	316.012	236.507	74.1088	292.63	315.451	443.693	167.823	317.671	211.034
ENSG00000091542	ALKBH5	-0.361565	0.085267	0.307486	2339.12	1791.98	1677.26	2317.98	2761.91	3454.53	2026.14	1692.84	1753.14	2836.26	1930.88	1700.82	2115.27	2222.83	2153.14
ENSG00000091592	NLRP1	-2.55428	1.9409e-10	3.53954e-08	37552	48038	154295	23692.8	18031.4	173526	12347.6	10109.9	18548	148189	24029.6	30401	28497.6	26624.3	46289.1
ENSG00000091622	PITPNM3	0.0270938	0.962725	0.986781	195.712	98.7015	206.323	83.7343	117.82	214.857	57.8071	204.122	78.7406	105.347	226.04	64.8318	194.919	491.737	330.487
ENSG00000091640	SPAG7	-0.684408	0.000923322	0.0129813	1082.31	886.12	1341.1	555.571	1010.31	1761.83	843.02	921.494	812.88	1563.09	1180.43	1124.43	1168.64	904.274	1120.87
ENSG00000091651	ORC6	0.415274	0.522787	0.784491	141.479	106.378	138.734	206.013	128.621	80.3379	77.0761	62.8069	33.5805	39.6175	102.471	34.4419	379.35	60.9232	46.7858
ENSG00000091656	ZFHX4	-0.436008	0.614813	0.838406	17.6849	905.86	950.685	499.748	33.3825	884.651	1174.45	1258.1	277.908	985.036	988.549	1710.95	385.469	106.18	980.512
ENSG00000091664	SLC17A6	-0.867173	0.513341	0.777997	8.25293	12.0635	194.761	59.8102	2.94551	245.684	1107.01	344.456	11.5795	23.4104	1.00462	15.1949	5.24447	6.09232	486.772
ENSG00000091732	ZC3HC1	-0.0357121	0.904183	0.965581	267.631	434.287	269.464	602.09	204.222	366.191	369.965	247.302	235.064	343.052	314.447	265.405	255.231	283.728	342.432
ENSG00000091831	ESR1	1.20294	0.236848	0.540236	20.0428	43.8673	22.233	33.2279	5.89102	14.9466	6.74416	208.048	33.5805	41.4183	17.0786	33.4289	6.99263	19.1473	295.647
ENSG00000091844	RGS17	1.4872	0.0080653	0.0657972	130.868	127.215	19.5651	11.962	21.6004	36.4323	110.797	72.6204	90.32	26.1116	106.49	66.8578	44.578	57.4419	79.6355
ENSG00000091879	ANGPT2	1.30386	0.0565492	0.24163	137.942	71.2844	64.9205	112.975	43.2008	12.1441	92.4913	416.095	119.269	81.0359	130.601	76.9877	248.238	90.5145	21.8998
ENSG00000091947	TMEM101	-0.17166	0.59932	0.82968	626.044	752.325	581.616	369.494	667.649	929.49	1332.45	894.016	602.134	759.036	426.965	536.888	531.44	554.401	766.491
ENSG00000091972	CD200	-0.366048	0.587696	0.82333	1961.84	193.016	1779.53	885.192	84.438	1917.83	784.249	1698.73	1293.43	1090.38	1989.15	862.06	1242.07	728.467	3136.64
ENSG00000091986	CCDC80	-2.0454	NA	NA	34.1907	32.9005	122.726	291.077	46.1463	51.3789	77.0761	2406.29	415.704	1245.25	44.2034	15.1949	46.3262	64.4045	204.066
ENSG00000092010	PSME1	-0.561907	0.0673535	0.267043	1755.52	1503.55	2547.91	3192.54	1543.45	2525.04	2599.39	2214.92	1103.53	3300.86	1375.33	2079.68	1208.85	1539.62	2575.21
ENSG00000092020	PPP2R3C	0.804347	0.0271072	0.150862	771.06	553.825	497.131	768.229	937.654	521.262	1834.41	809.62	987.731	468.207	1196.51	702.007	480.743	932.125	410.123
ENSG00000092036	HAUS4	-0.559418	0.158752	0.436095	146.195	127.215	208.991	93.0382	205.204	248.487	222.557	323.848	110.005	298.932	99.4576	105.352	187.927	126.198	304.606
ENSG00000092051	JPH4	-1.28135	0.043524	0.205167	2282.53	3433.71	25296.8	21231.3	2858.13	18110.6	12455.5	4124.64	3631.33	13424	4309.83	12388.9	4095.06	4543.13	18170.8
ENSG00000092054	MYH7	0.454342	0.269318	0.577753	2141.05	1352.21	1200.58	1511.21	2234.66	1354.53	1070.39	501.474	1844.61	1431.63	2499.5	3253.75	1628.41	2730.23	1082.05
ENSG00000092068	SLC7A8	0.113508	0.830187	0.938395	484.565	2979.69	964.025	2547.92	663.722	1261.12	1519.36	805.694	409.914	1021.95	838.86	530.81	971.975	1020.9	1279.14
ENSG00000092094	OSGEP	-0.291013	0.376466	0.677526	715.647	915.73	1139.22	1754.43	576.338	911.741	575.18	644.752	1179.95	1140.81	1044.81	947.152	554.166	646.656	883.954
ENSG00000092096	SLC22A17	-0.575411	0.255552	0.562664	7470.08	22660.8	12493.2	11277.6	5784.98	18374	3452.05	2550.55	7127.18	14504.5	10320.5	13786.9	11394.5	7555.35	18414.7
ENSG00000092098	RNF31	0.0800909	0.798715	0.924643	567.094	1237.06	1158.79	1545.76	639.176	658.584	1202.39	722.279	661.189	706.813	751.458	997.802	702.759	712.802	935.717
ENSG00000092108	SCFD1	0.527884	0.13086	0.393264	1463.13	3625.63	1342.88	3251.02	1609.23	1217.21	2581.09	1336.61	1256.38	1419.93	1821.38	1955.08	1080.36	1456.06	1520.04
ENSG00000092140	G2E3	0.701332	0.0759546	0.287135	163.88	637.173	207.212	482.469	255.278	199.91	596.376	326.792	202.641	202.59	255.174	336.315	228.134	275.025	207.052
ENSG00000092148	HECTD1	0.2489	0.348209	0.654458	1792.07	2851.38	2566.58	2388.42	2102.11	2336.34	5153.5	2718.36	2109.78	1880.03	2426.16	3057.22	2700.9	2369.91	2569.24
ENSG00000092199	HNRNPC	0.19081	0.430796	0.720676	9813.92	12438.6	7512.99	16147.4	8646.06	9143.57	11558.5	7383.73	7329.82	8992.28	9416.33	10884.6	7799.4	7730.28	7957.57
ENSG00000092200	RPGRIP1	-0.656873	0.230294	0.532252	4.71596	12.0635	18.6758	25.2532	11.782	27.0907	19.269	19.6271	5.78975	11.7052	9.0416	4.05199	13.1112	11.3143	9.95443
ENSG00000092201	SUPT16H	0.482474	0.0887309	0.31544	2989.92	4328.61	2804.03	5421.47	3022.09	2903.37	7270.2	3443.58	2428.22	2553.53	3578.47	3889.91	3358.21	3282.89	3153.56
ENSG00000092203	TOX4	0.572426	0.0730429	0.280091	1340.51	2356.77	1357.1	3709.56	1811.49	1384.43	3602.34	1780.18	1516.91	1327.19	1722.93	1556.98	1540.13	1738.05	1527.01
ENSG00000092208	GEMIN2	0.353403	0.324937	0.635047	114.362	265.397	120.948	155.507	175.749	149.466	320.829	218.843	138.954	120.653	118.545	161.066	115.378	120.976	92.5762
ENSG00000092295	TGM1	0.181994	0.763397	0.910744	15.3269	33.9972	47.134	34.557	4.90919	23.354	53.9533	44.1611	28.9487	15.3068	39.1803	66.8578	25.3483	10.444	31.8542
ENSG00000092330	TINF2	-0.0916192	0.705605	0.881508	846.515	909.15	1060.96	1484.62	1148.75	1179.85	1627.27	1200.2	956.466	1083.18	690.176	1009.96	853.101	886.868	866.036
ENSG00000092421	SEMA6A	-0.805173	0.0612038	0.252997	894.854	270.881	1060.96	247.216	136.475	570.772	522.191	475.958	629.924	839.172	399.84	733.41	525.321	448.221	372.296
ENSG00000092439	TRPM7	0.0271995	0.913393	0.968817	497.534	440.867	716.793	417.343	775.651	706.226	793.884	822.377	629.924	570.853	883.063	630.084	927.397	684.081	621.157
ENSG00000092445	TYRO3	1.31297	0.0491528	0.221485	143.837	35.0939	14.2291	33.2279	96.22	18.6832	62.6243	100.098	101.9	67.5299	66.3051	21.2729	128.49	189.732	18.9134
ENSG00000092470	WDR76	-0.35045	0.434596	0.722692	90.7823	99.7982	160.967	30.5697	207.168	121.441	132.956	55.9374	76.4247	132.359	165.763	74.9618	182.682	93.9958	88.5944
ENSG00000092529	CAPN3	0.0220986	0.963245	0.986781	42.4437	18.6436	41.7981	14.6203	15.7094	32.6956	16.3787	32.3848	54.4236	18.9084	33.1525	61.7928	24.4742	36.5539	28.8679
ENSG00000092531	SNAP23	-0.494649	0.355247	0.659709	86.0663	112.958	387.744	505.064	531.174	406.36	145.481	660.453	342.753	432.191	179.827	146.885	183.556	303.746	283.701
ENSG00000092607	TBX15	-0.475847	0.696936	0.87933	9.43192	9.87015	16.0078	2.65823	4.90919	4.67081	0.963451	211.973	93.7939	144.964	5.02311	8.10397	19.2297	35.6836	74.6582
ENSG00000092621	PHGDH	-0.141878	0.859177	0.95021	203.965	236.884	325.492	98.3546	167.894	223.265	666.708	521.101	273.276	132.359	11.0508	52.6758	61.1855	55.7012	120.449
ENSG00000092758	COL9A3	1.11646	0.345977	0.652744	17.6849	7.67678	6.22525	1.32912	4.90919	28.0248	6.74416	97.1544	260.539	52.2231	12.0555	17.2209	18.3556	274.154	31.8542
ENSG00000092820	EZR	0.513893	0.434722	0.722796	1497.32	3426.04	6323.97	13028	2969.08	2160.71	4303.74	4634.95	4555.37	1337.09	10645	3891.93	1167.77	4955.67	1024.31
ENSG00000092841	MYL6	-0.444266	0.0681748	0.26876	8251.75	11101.7	11611	14431.5	9796.77	13272.6	8274.12	13687	8701.99	13114.3	6933.9	7072.74	7408.69	7052.3	8997.81
ENSG00000092847	AGO1	-0.267569	0.0829918	0.30293	947.908	834.576	1051.18	599.432	871.871	1148.08	1034.75	892.054	749.193	948.12	851.92	812.423	970.227	884.257	1004.4
ENSG00000092850	TEKT2	1.53312	0.0311513	0.16531	383.172	140.375	160.078	14.6203	95.2382	68.1938	180.165	180.57	494.444	54.9243	199.92	814.449	369.735	265.451	140.357
ENSG00000092853	CLSPN	1.02904	0.172252	0.454815	17.6849	23.0303	29.3476	18.6076	38.2916	5.60497	90.5644	26.4966	18.5272	9.00399	22.1017	6.07798	72.5485	16.5363	7.96355
ENSG00000092871	RFFL	0.518503	0.231479	0.533711	317.148	218.24	294.365	192.722	269.023	208.318	1000.06	413.151	221.168	215.195	240.105	307.951	232.505	350.744	349.401
ENSG00000092929	UNC13D	0.265559	0.606289	0.834038	102.572	130.505	227.666	204.684	89.3472	158.807	122.358	561.336	343.911	156.669	273.257	366.705	133.734	161.011	122.44
ENSG00000092931	MFSD11	0.113587	0.656523	0.859799	812.324	894.893	1006.71	627.343	1075.11	975.264	1819.96	1015.7	1071.1	812.16	1042.8	731.384	976.346	970.42	1052.18
ENSG00000092964	DPYSL2	0.0661956	0.903815	0.965527	5067.3	5662.18	3711.14	840.002	978.892	2227.97	1170.59	2000.01	1471.75	2205.08	3259	3962.84	5497.95	2259.38	1936.14
ENSG00000092969	TGFB2	-1.32858	0.060034	0.249845	7.07394	17.5469	13.3398	3.98735	3.92735	14.0124	25.0497	300.295	22.001	62.1275	14.0647	4.05199	14.8593	13.9253	2.98633
ENSG00000092978	GPATCH2	-0.0407499	0.851294	0.94657	161.522	214.95	329.049	252.532	291.606	230.738	344.916	252.209	223.484	203.49	255.174	215.768	259.601	219.324	275.738
ENSG00000093000	NUP50	9.99783e-05	0.999744	0.99985	728.616	528.601	847.523	433.292	1625.92	904.268	688.868	856.725	805.933	794.152	1160.34	752.657	954.494	857.277	789.386
ENSG00000093009	CDC45	1.4862	0.0552249	0.237939	97.8562	30.7071	44.4661	31.8988	148.257	5.60497	49.136	36.3102	27.7908	16.2072	41.1895	33.4289	208.031	26.1099	11.9453
ENSG00000093010	COMT	-0.493919	0.192757	0.484407	1187.24	423.32	1151.67	462.533	1096.71	1129.4	438.37	1561.34	1093.1	1428.03	595.741	1176.09	795.411	721.505	983.498
ENSG00000093072	ADA2	-0.762944	0.258057	0.565292	858.305	1525.49	1896.92	447.912	2733.43	1270.46	324.683	713.447	1749.66	2834.46	883.063	1602.56	308.55	179.288	2821.09
ENSG00000093144	ECHDC1	-0.0895185	0.769602	0.913483	728.616	1216.22	788.828	420.001	639.176	615.612	505.812	665.36	596.344	685.203	769.541	668.578	352.254	810.279	483.785
ENSG00000093167	LRRFIP2	0.29745	0.215518	0.513121	1353.48	709.554	957.799	945.002	1323.52	908.005	1067.5	1391.56	898.569	938.216	1591.32	957.282	1525.27	1161.02	858.072
ENSG00000093183	SEC22C	0.0696444	0.780144	0.916799	1423.04	1554	1960.06	1874.05	2783.51	1861.78	2092.62	1590.78	1339.75	1525.28	2498.5	1201.41	1717.56	2137.53	2231.78
ENSG00000093217	XYLB	1.01803	0.0458605	0.212144	90.7823	74.5745	48.9127	26.5823	140.403	60.7205	121.395	71.6391	104.215	31.514	104.481	39.5069	233.379	80.9408	53.7539
ENSG00000094631	HDAC6	-0.92084	0.00555654	0.0507881	2141.05	1051.72	6867.34	2347.22	2325.97	3317.21	1865.24	1460.26	3063.93	2751.62	2609	1891.26	2745.48	2519.61	3310.84
ENSG00000094804	CDC6	1.63526	0.0382794	0.187357	47.1596	38.3839	27.569	25.2532	87.3835	6.53913	184.019	56.9187	13.8954	18.008	15.0693	20.2599	122.371	22.6286	13.9362
ENSG00000094841	UPRT	0.00224885	0.992912	0.996089	557.663	706.264	383.298	473.166	420.226	494.171	427.772	322.867	274.434	487.116	580.672	403.173	363.617	435.166	502.699
ENSG00000094880	CDC23	0.278332	0.363879	0.666667	400.857	561.502	441.104	1170.95	448.7	497.908	794.847	479.884	383.281	459.203	476.191	570.317	492.98	558.753	446.954
ENSG00000094914	AAAS	0.381471	0.220915	0.520468	1438.37	1765.66	1838.23	2348.55	2152.19	1432.07	1437.47	1282.63	2701.5	1246.15	2555.76	2948.83	2061.95	911.237	1931.16
ENSG00000094916	CBX5	-0.242857	0.341613	0.649983	4027.43	4746.44	4620.03	4639.95	3230.24	4966	3543.57	2194.31	2403.9	3968.96	4009.45	5929.07	3708.71	3717.19	3670.2
ENSG00000094963	FMO2	0.985767	0.413324	0.706735	7.07394	5.48342	15.1185	66.4558	85.4198	8.40745	119.468	940.14	206.115	184.582	13.0601	18.2339	9.61486	102.699	74.6582
ENSG00000094975	SUCO	-0.472482	0.122989	0.381082	1071.7	1376.34	2443.86	3022.41	1987.24	2815.56	2696.7	1216.88	1379.12	1991.68	1881.66	1332.09	1265.67	1729.35	1946.09
ENSG00000095002	MSH2	0.044727	0.89303	0.962716	560.021	660.203	533.593	194.051	546.883	397.019	421.028	427.872	408.756	515.929	710.268	280.6	733.352	551.79	471.84
ENSG00000095015	MAP3K1	0.588771	0.15126	0.424568	162.701	290.621	159.189	182.089	118.802	181.227	276.511	368.99	231.59	215.195	166.767	403.173	285.824	233.249	621.157
ENSG00000095059	DHPS	-0.143226	0.635841	0.849969	2718.75	3150.77	3002.35	5260.64	2613.65	3208.84	2760.29	1568.21	2546.33	2721.91	2046.42	3272.99	2386.23	1584	2450.78
ENSG00000095066	HOOK2	-0.497336	0.174637	0.458303	1901.71	1765.66	7052.32	4048.49	4314.19	3391.94	3005.97	2180.58	5314.99	2656.18	2572.84	4161.39	2333.79	2423	3100.81
ENSG00000095139	ARCN1	0.0605939	0.791451	0.921522	2895.6	4293.51	3684.46	5711.21	4432.99	3403.15	4407.79	2983.33	2796.45	3435.92	3730.16	2651.01	2985.85	3299.43	3714.99
ENSG00000095203	EPB41L4B	-0.300665	0.589477	0.824165	208.681	225.917	189.425	41.2026	90.329	273.709	68.405	131.502	94.9518	75.6335	218.003	76.9877	249.986	275.895	66.6947
ENSG00000095209	TMEM38B	-0.355215	0.553373	0.803305	422.079	1915.91	1138.33	2304.69	166.912	1038.79	1273.68	542.691	680.874	1096.69	601.769	1021.1	360.12	377.724	571.384
ENSG00000095261	PSMD5	-0.0294214	0.949355	0.981527	560.021	1620.9	510.471	1310.51	380.953	877.177	666.708	528.952	497.918	710.415	215.994	754.682	530.566	460.405	696.81
ENSG00000095303	PTGS1	1.3147	0.123531	0.38186	213.397	388.226	61.3632	143.545	207.168	73.7987	29.867	236.507	70.6349	123.355	29.1341	38.4939	75.1707	1033.95	105.517
ENSG00000095319	NUP188	0.0909686	0.806074	0.927596	1102.36	1877.52	1509.18	1846.14	406.481	979.001	1909.56	932.289	1039.84	1022.85	934.299	1674.48	968.479	1061.8	1206.48
ENSG00000095321	CRAT	1.95113	0.00337026	0.0353151	1403	253.334	234.781	578.166	1083.95	236.343	1333.42	1045.15	1117.42	266.518	1550.13	86.1047	1554.99	1284.61	118.458
ENSG00000095370	SH2D3C	0.89368	0.213458	0.510643	531.725	944.244	96.0467	103.671	73.6378	62.5888	299.633	967.618	391.387	444.797	243.119	115.482	361.868	260.229	192.121
ENSG00000095380	NANS	1.2366	0.005731	0.0519571	1478.45	2531.14	482.012	2193.04	949.437	441.858	610.828	660.453	1139.42	533.936	1211.57	645.279	934.39	930.384	458.899
ENSG00000095383	TBC1D2	-0.718217	0.0151902	0.102581	168.596	176.566	319.266	206.013	136.475	349.376	116.578	265.948	276.75	414.183	344.586	195.508	282.327	257.618	205.061
ENSG00000095397	WHRN	-0.281705	0.497373	0.767636	2926.25	1920.29	2190.4	2102.66	718.705	2097.19	735.113	663.397	2129.47	2086.22	1366.29	2528.44	2160.72	1593.58	2129.25
ENSG00000095464	PDE6C	1.83835	0.0162826	0.107433	31.8327	6.5801	14.2291	67.7849	40.2553	0	41.4284	22.5712	26.6328	9.90439	9.0416	22.2859	13.1112	16.5363	48.7767
ENSG00000095485	CWF19L1	0.0239292	0.933487	0.976069	367.845	460.607	340.61	746.964	406.481	492.303	249.534	282.631	465.496	389.873	384.77	452.809	376.728	291.561	490.754
ENSG00000095539	SEMA4G	0.00958109	0.983339	0.993802	514.04	135.989	836.852	217.975	636.23	416.636	586.742	289.5	668.137	289.028	473.177	836.735	612.729	506.533	732.646
ENSG00000095564	BTAF1	0.268522	0.378687	0.67878	516.398	734.778	928.452	777.533	755.033	567.036	754.382	1364.09	1284.17	650.988	575.649	638.188	915.16	794.613	1232.36
ENSG00000095574	IKZF5	0.341711	0.0534719	0.23346	415.005	455.124	297.923	486.457	611.685	396.084	344.916	347.4	452.758	382.669	462.126	420.394	496.477	493.478	470.845
ENSG00000095585	BLNK	-0.705287	0.268862	0.577033	7.07394	13.1602	22.233	34.557	18.6549	37.3664	2.89035	42.1984	20.8431	45.0199	11.0508	15.1949	20.9779	17.4066	52.7585
ENSG00000095587	TLL2	-0.875668	0.158153	0.435432	38.9067	31.8038	137.845	97.0255	25.5278	17.7491	23.1228	21.5899	9.26359	64.8287	45.208	45.5848	29.7187	32.2023	81.6263
ENSG00000095637	SORBS1	3.09297	9.49189e-09	1.10444e-06	1789.71	761.098	268.575	333.608	914.09	102.758	905.644	1333.66	2192	115.251	1483.83	2024.98	2970.99	1458.68	439.986
ENSG00000095713	CRTAC1	1.16949	0.307958	0.618263	5402.13	11720.3	425.096	316.33	209.131	73.7987	70.3319	2615.32	928.675	2849.76	4941.74	365.692	2697.41	713.672	148.321
ENSG00000095739	BAMBI	-0.966365	NA	NA	9.43192	156.826	9.78254	15.9494	15.7094	14.0124	4.81726	832.191	71.7929	204.391	26.1202	15.1949	60.3114	27.8506	32.8496
ENSG00000095752	IL11	1.80445	0.0107776	0.0809216	112.004	77.8645	56.0273	97.0255	35.3461	25.2224	20.2325	80.4713	105.373	43.2191	58.2681	183.352	177.438	381.205	410.123
ENSG00000095777	MYO3A	5.0498	7.2773e-06	0.000287799	66.0235	10.9668	1.77864	1.32912	13.7457	0.934161	68.405	32.3848	141.27	1.8008	115.532	32.4159	28.8446	85.2925	2.98633
ENSG00000095787	WAC	-0.126962	0.356286	0.66061	2787.13	3268.12	3088.61	2555.89	3047.62	3097.68	2287.23	2490.68	2400.43	3207.22	3413.71	2892.11	2990.22	3252.43	3020.17
ENSG00000095794	CREM	-0.348944	0.263921	0.571733	525.83	739.164	403.752	366.836	300.442	508.184	230.265	595.684	400.65	667.195	328.512	315.042	364.491	372.502	421.072
ENSG00000095906	NUBP2	-0.267708	0.331748	0.641248	1886.38	1920.29	1669.26	2795.13	1730.98	2077.57	1007.77	1103.05	1800.61	1974.57	1192.49	1503.29	1534.01	1194.97	1344.84
ENSG00000095917	TPSD1	3.8445	0.0175989	0.112802	0	1.09668	2.66796	1.32912	2.94551	8.40745	0.963451	74.5831	399.493	3.6016	285.313	3.03899	11.363	61.7935	0.995443
ENSG00000095932	SMIM24	3.67971	0.00325797	0.0344046	0	2.19337	7.11457	94.3673	76.5833	3.73664	2.89035	9.81357	194.535	1.8008	80.3698	131.69	41.9558	7.83298	6.9681
ENSG00000095951	HIVEP1	1.08262	0.0128798	0.0918341	1660.02	1392.79	306.816	289.747	723.614	413.833	575.18	507.362	650.768	580.757	1078.96	876.242	1347.83	1285.48	636.088
ENSG00000095970	TREM2	-0.146612	0.811039	0.929211	90.7823	31.8038	16.8971	94.3673	36.328	86.877	11.5614	19.6271	74.1088	53.1235	62.2866	31.4029	42.8298	17.4066	55.7448
ENSG00000096060	FKBP5	0.803658	0.15322	0.427089	4533.22	10829.7	7074.55	19980.6	23767.3	12841.9	31237	10624.2	5295.3	3202.72	9049.64	10359.9	9225.02	21444.1	5072.78
ENSG00000096063	SRPK1	0.756208	0.0422899	0.201424	514.04	619.626	422.428	1132.41	953.364	391.414	753.419	438.667	662.347	360.16	219.008	887.385	605.736	753.707	393.2
ENSG00000096070	BRPF3	-0.236973	0.377664	0.678293	1691.85	2025.57	1800.88	1399.56	1811.49	2173.79	1382.55	854.762	1361.75	2135.75	1433.6	2124.25	2620.49	2147.98	1883.38
ENSG00000096080	MRPS18A	-0.0503486	0.863902	0.951993	518.756	948.631	466.005	474.495	439.863	510.986	300.597	377.823	332.331	501.522	343.581	544.992	535.81	428.203	466.863
ENSG00000096092	TMEM14A	-0.174427	0.680669	0.871853	1077.6	2104.53	963.135	893.166	1310.75	1059.34	331.427	444.555	676.242	1045.36	757.485	554.109	1109.21	749.355	866.036
ENSG00000096093	EFHC1	0.0667331	0.823997	0.935827	1049.3	967.275	1416.69	1208.17	1439.37	1238.7	691.758	784.104	1607.23	1181.32	1307.01	2145.53	1646.76	1607.5	1618.59
ENSG00000096384	HSP90AB1	0.438788	0.274963	0.584566	51653.9	102710	32020	50317.7	40748.2	36070.8	16766.9	21509.4	37837.2	41960.4	56332.2	69080.3	52831	56299.1	40596.2
ENSG00000096401	CDC5L	-0.209305	0.454391	0.737588	989.173	1493.68	1306.41	608.735	976.928	1116.32	607.938	751.72	846.461	1067.87	926.262	1254.09	1414.26	1302.89	902.867
ENSG00000096433	ITPR3	1.96396	0.0196142	0.121156	55.4126	348.745	54.2486	107.658	1064.31	26.1565	222.557	894.016	594.028	232.303	83.3837	143.846	676.537	628.379	60.722
ENSG00000096654	ZNF184	0.348385	0.343085	0.651194	155.627	187.533	108.497	39.8735	118.802	104.626	77.0761	153.092	182.956	129.657	145.67	146.885	209.779	176.677	150.312
ENSG00000096696	DSP	-0.497651	0.526302	0.787334	964.414	983.725	100.493	482.469	170.84	1367.61	480.762	416.095	193.378	743.729	813.744	1403	164.327	127.068	66.6947
ENSG00000096717	SIRT1	-0.409973	0.0339084	0.174142	387.888	363.002	501.577	321.646	395.68	638.966	310.231	538.765	407.598	524.032	385.775	573.356	456.269	421.24	446.954
ENSG00000096746	HNRNPH3	-0.222361	0.176912	0.461979	3467.41	3579.57	3656.89	3645.77	2800.2	4055.19	2293.98	3374.89	3419.42	3869.91	3383.57	4405.52	2893.2	3015.7	3434.28
ENSG00000096872	IFT74	0.18998	0.557277	0.805956	361.95	921.214	378.851	628.672	318.115	486.698	530.862	352.307	340.437	443.897	482.219	736.449	423.928	340.3	539.53
ENSG00000096968	JAK2	-1.40282	0.00340715	0.0356033	228.724	682.137	1180.13	400.064	109.966	526.867	237.009	485.772	148.218	561.849	286.317	214.755	296.313	177.548	166.239
ENSG00000096996	IL12RB1	0.184034	0.822928	0.935598	14.1479	72.3811	12.4505	21.2659	7.8547	14.0124	2.89035	36.3102	10.4215	20.7092	3.01387	9.11697	9.61486	6.96265	20.9043
ENSG00000097007	ABL1	0.0399464	0.8694	0.954334	1802.68	2525.66	2426.96	3861.08	1765.34	2441.9	3045.47	2724.25	1711.45	2529.22	2290.54	3423.93	2409.83	2247.2	2617.02
ENSG00000097021	ACOT7	-0.477885	0.302667	0.612812	2013.72	988.112	2023.21	466.52	827.689	492.303	700.429	587.833	485.181	1414.53	1081.98	1751.47	717.618	885.997	781.423
ENSG00000097033	SH3GLB1	0.13384	0.388124	0.686026	1637.62	1299.57	1385.56	1878.04	2055.97	1485.32	1757.34	1961.73	1514.6	1598.21	1635.53	1316.9	1454.47	1584	1519.05
ENSG00000097046	CDC7	1.07801	0.0103652	0.0786974	281.779	135.989	227.666	584.811	429.063	98.0869	414.284	198.234	303.383	120.653	445.048	203.612	276.209	344.651	154.294
ENSG00000097096	SYDE2	-0.12527	0.685508	0.873922	101.393	186.436	184.979	159.494	80.5106	161.61	265.913	175.663	100.742	184.582	153.707	164.105	171.319	171.455	216.011
ENSG00000099139	PCSK5	-1.64977	0.0786407	0.292828	17.6849	91.0247	388.634	23.9241	10.8002	73.7987	14.4518	390.58	167.903	218.797	22.1017	19.2469	30.5927	31.3319	48.7767
ENSG00000099194	SCD	-3.05581	2.18547e-05	0.000718364	1037.51	5373.75	18451.6	1065.95	245.459	2366.23	580.961	598.628	994.678	10105.2	553.547	660.474	794.537	911.237	2058.58
ENSG00000099203	TMED1	0.123079	0.582991	0.821	1109.43	1416.91	843.077	1064.62	744.233	916.412	974.049	595.684	888.147	885.992	888.086	1191.28	868.834	757.188	1028.29
ENSG00000099204	ABLIM1	1.01064	0.000567554	0.00905385	2036.12	1904.94	1252.16	1949.81	2066.77	1305.96	5074.5	3328.76	1997.46	1211.04	1958.01	2511.22	2915.05	1911.25	2720.55
ENSG00000099219	ERMP1	0.17235	0.70277	0.880979	732.153	1802.95	723.018	622.027	197.349	645.505	1217.8	896.96	555.816	650.088	518.385	575.382	582.136	492.608	905.853
ENSG00000099246	RAB18	-0.472453	0.0736492	0.281362	2418.11	2749.38	3236.24	2264.81	2858.13	2745.5	1210.09	1338.57	1393.01	2765.12	2713.49	2177.94	2179.08	1960.86	1954.06
ENSG00000099250	NRP1	0.633944	0.417107	0.709494	754.554	339.972	335.274	203.355	212.077	140.124	472.091	3354.28	1272.59	1343.39	250.151	862.06	904.671	590.085	2073.51
ENSG00000099251	HSD17B7P2	0.742126	0.283511	0.592923	74.2764	19.7403	32.0156	45.19	143.348	63.523	30.8304	52.0119	177.166	49.5219	98.453	104.339	5.24447	140.123	79.6355
ENSG00000099256	PRTFDC1	-0.946939	0.0203793	0.124321	304.18	320.231	446.439	162.152	195.386	526.867	382.49	351.326	126.216	594.263	117.541	312.003	284.95	162.752	532.562
ENSG00000099260	PALMD	0.800604	0.426299	0.717676	12.9689	18.6436	32.0156	38.5444	60.8739	82.2062	75.1492	852.799	346.227	230.502	53.245	38.4939	95.2746	249.785	559.439
ENSG00000099282	TSPAN15	-0.694548	0.128764	0.389751	193.354	74.5745	176.086	86.3926	179.676	260.631	67.4416	190.383	264.012	211.594	94.4345	72.9358	217.646	94.8661	66.6947
ENSG00000099284	H2AFY2	-0.271732	0.342924	0.651041	1405.36	843.349	1116.1	761.584	1254.79	1190.12	661.891	500.492	987.731	1073.28	683.143	1288.53	853.101	782.428	1175.62
ENSG00000099290	WASHC2A	-0.0233525	0.940372	0.978571	800.535	437.577	842.188	501.077	754.051	908.005	578.071	818.452	917.096	757.235	1080.97	596.655	1031.41	909.496	1441.4
ENSG00000099308	MAST3	-0.298108	0.368446	0.670764	1025.72	2410.51	1605.23	857.28	756.015	927.622	1011.62	1042.2	836.039	1642.33	751.458	1075.8	1473.7	1064.42	1278.15
ENSG00000099326	MZF1	-0.526936	0.0372962	0.184497	1970.09	1177.84	3272.7	2590.45	1950.91	2414.81	1467.34	1123.65	2405.06	2176.26	1666.67	2108.05	1959.68	1520.47	1893.33
ENSG00000099330	OCEL1	-0.4491	0.139394	0.406172	274.705	137.085	211.659	237.912	415.317	337.232	217.74	266.929	180.64	362.861	220.012	174.235	168.697	208.88	169.225
ENSG00000099331	MYO9B	0.00393111	0.99118	0.995586	667.309	818.126	1336.65	2202.35	891.508	883.716	1366.17	1838.08	1230.9	1119.2	871.008	649.331	985.086	1050.49	826.218
ENSG00000099337	KCNK6	0.278894	0.68209	0.871988	38.9067	248.947	36.4622	55.8229	48.11	51.3789	52.9898	260.06	106.531	134.159	24.1109	80.0267	61.1855	32.2023	68.6856
ENSG00000099338	CATSPERG	0.0219747	0.9683	0.98847	17.6849	40.5773	57.8059	147.532	31.4188	44.8397	87.6741	51.0306	55.5816	41.4183	23.1063	37.4809	36.7113	25.2396	32.8496
ENSG00000099341	PSMD8	0.341631	0.153907	0.427869	3302.35	3702.4	2253.54	4764.88	3209.63	2527.84	4108.16	2272.82	2267.26	2574.24	3438.82	2217.45	2658.95	2796.38	2547.34
ENSG00000099364	FBXL19	-0.54382	0.0496656	0.223002	570.631	324.618	1076.08	521.014	667.649	794.971	316.975	546.616	790.879	667.195	612.82	788.111	529.692	633.601	661.97
ENSG00000099365	STX1B	0.741448	0.293262	0.602731	1392.39	390.419	182.311	61.1394	72.6559	173.754	177.275	178.607	216.537	325.044	391.803	237.041	810.271	355.095	271.756
ENSG00000099377	HSD3B7	-0.7115	0.235058	0.538029	108.467	93.2181	43.5768	19.9367	83.4562	66.3254	12.5249	38.2729	33.5805	153.068	49.2265	23.2989	96.1486	45.2572	38.8223
ENSG00000099381	SETD1A	-0.313815	0.189775	0.479491	1417.15	1624.19	1998.31	2344.56	1176.24	1606.76	949	997.059	1490.28	1875.53	1364.28	1740.33	1365.31	1463.03	1709.18
ENSG00000099385	BCL7C	0.0716719	0.824231	0.935827	901.928	616.336	669.659	738.989	1273.44	898.663	439.334	1027.48	644.978	780.646	1451.68	586.525	875.827	732.819	584.325
ENSG00000099399	MAGEB2	-0.11776	0.974125	0.990484	2.35798	0	0	3.98735	0	0	0	0	0	1.8008	0	1.013	0	133.161	0
ENSG00000099617	EFNA2	0.794042	0.406371	0.700467	41.2647	26.3204	19.5651	2.65823	5.89102	16.8149	7.70761	18.6458	1.15795	3.6016	9.0416	15.1949	75.1707	63.5342	9.95443
ENSG00000099622	CIRBP	-0.247579	0.371623	0.673052	33176.8	36346.3	38192.8	56636.3	28240.6	37952.2	20752.7	17507.4	30620.8	33557.9	28152.5	36747.5	27911.1	26934.1	26592.3
ENSG00000099624	ATP5F1D	-0.786973	0.000562002	0.00900248	2197.64	2237.23	2919.64	2434.94	1399.12	3078.06	2051.19	1626.11	1698.71	2823.65	1431.59	1400.97	1291.89	1459.55	1225.39
ENSG00000099625	CBARP	-0.805461	0.311126	0.62149	1135.37	2420.38	175.196	47.8482	39.2735	156.005	222.557	269.873	149.375	963.427	69.319	205.638	295.439	188.862	140.357
ENSG00000099715	PCDH11Y	-1.94743	0.0902222	0.31795	2.35798	12.0635	13.3398	0	2.94551	8.40745	3.85381	0.981357	0	8.10359	0	4.05199	1.74816	0	546.498
ENSG00000099769	IGFALS	0.62161	0.32722	0.637303	10.6109	29.6104	14.2291	57.152	7.8547	9.34161	5.78071	10.7949	27.7908	18.9084	14.0647	29.3769	22.726	33.9429	12.9408
ENSG00000099783	HNRNPM	0.163345	0.470119	0.748637	6549.29	6040.53	6773.96	13666	7715.28	7165.95	8491.86	7633.98	6872.43	6401.84	7239.31	7496.18	5725.21	6967	6728.2
ENSG00000099785	MARCHF2	-0.82095	0.0015199	0.0190274	455.09	359.712	677.663	733.672	575.357	871.572	419.101	552.504	466.654	918.407	382.761	266.418	354.002	477.812	546.498
ENSG00000099795	NDUFB7	-0.232928	0.441577	0.727877	2732.9	3552.16	1864.02	3787.98	2186.55	3314.4	1987.6	1602.56	1727.66	2603.05	1731.97	1791.99	2013.88	1624.91	1748
ENSG00000099797	TECR	-0.527668	0.109457	0.355717	3498.06	5196.08	4684.06	5424.13	2245.46	4052.39	1589.69	1938.18	3103.3	4691.98	3353.43	3033.92	2607.38	3043.55	2229.79
ENSG00000099800	TIMM13	0.117003	0.607294	0.83501	1887.56	2218.59	1255.72	2389.75	1426.61	1743.14	1563.68	1275.76	1559.76	1554.09	1559.17	1911.52	1519.15	1318.55	1123.86
ENSG00000099804	CDC34	0.262803	0.314881	0.625279	2320.25	2044.22	1280.62	2752.6	1718.21	1559.12	1562.72	1248.29	1857.35	1390.22	1187.46	1646.12	1123.19	1408.2	1436.42
ENSG00000099810	MTAP	0.878662	0.0391405	0.189926	176.849	638.27	106.719	183.418	132.548	109.297	148.372	336.606	157.481	161.171	218.003	210.703	188.801	185.381	198.093
ENSG00000099812	MISP	-1.00453	0.200109	0.493661	1437.19	25.2237	1836.45	35.8861	598.921	1556.31	787.14	402.356	1623.44	2121.34	994.576	1497.21	1201.86	1402.97	986.484
ENSG00000099814	CEP170B	-0.0110462	0.972606	0.990352	2664.52	1795.27	3612.42	5474.63	2678.45	2582.02	4632.27	2361.15	3552.59	2914.59	2258.39	3881.8	2101.28	2490.89	2269.61
ENSG00000099817	POLR2E	0.13597	0.666501	0.865244	3745.65	4353.83	3086.84	8247.17	3084.93	3380.73	3598.49	3162.91	2511.59	3396.3	2902.35	3242.6	2797.05	2558.77	3153.56
ENSG00000099821	POLRMT	0.418168	0.116034	0.368242	1683.6	2340.32	2163.72	3728.17	1803.63	1372.28	3097.5	1895.98	2796.45	1497.36	1843.48	1996.62	1798.85	2196.72	1725.1
ENSG00000099822	HCN2	0.0839721	0.86602	0.952998	1348.77	1964.16	923.116	191.393	906.236	606.271	843.02	442.592	1509.97	1394.72	921.239	959.308	1050.64	1646.67	613.193
ENSG00000099834	CDHR5	-1.60277	0.00683658	0.0587772	7.07394	6.5801	49.802	13.2912	3.92735	9.34161	3.85381	4.90679	20.8431	30.6136	11.0508	8.10397	13.1112	13.9253	11.9453
ENSG00000099840	IZUMO4	0.333249	0.618937	0.840886	424.437	199.596	1255.72	225.95	839.471	289.59	937.438	540.728	2701.5	331.347	1326.1	777.981	585.633	644.916	253.838
ENSG00000099849	RASSF7	-0.763344	0.084474	0.305931	565.915	485.831	1573.21	180.76	642.121	723.041	693.685	459.275	1355.96	592.462	389.794	572.343	640.699	409.926	411.118
ENSG00000099860	GADD45B	4.45755	7.23051e-11	1.42848e-08	3861.19	768.775	147.627	1751.78	9418.76	133.585	4867.36	9917.6	5985.44	426.789	11230.7	6527.75	1484.19	5340.35	1070.1
ENSG00000099864	PALM	0.0528099	0.928178	0.973831	1740.19	1015.53	2026.76	200.697	1624.94	1725.4	3154.34	1899.91	2137.57	2259.1	1320.07	1181.15	5136.08	4040.08	1489.18
ENSG00000099866	MADCAM1	-1.09987	0.0513447	0.227737	90.7823	84.4446	335.274	188.735	99.1656	157.873	30.8304	50.0492	119.269	47.7211	61.282	50.6498	142.475	52.2199	40.8132
ENSG00000099869	IGF2-AS	1.81913	0.308696	0.619082	22.4008	36.1905	0	0	1.96367	0.934161	0.963451	29.4407	5.78975	25.2112	0	0	46.3262	223.675	1.99089
ENSG00000099875	MKNK2	-0.838716	0.0244826	0.140547	1608.14	1829.27	4160.25	4275.77	1915.56	6192.55	3577.29	3400.4	2357.58	3904.13	2082.58	2150.59	1474.57	2053.11	5162.37
ENSG00000099889	ARVCF	0.165116	0.781613	0.917201	2490.03	233.594	1902.26	457.216	1350.03	1169.57	471.128	2160.95	3520.17	1137.2	1896.73	1392.87	1631.03	2342.06	931.735
ENSG00000099899	TRMT2A	-0.290619	0.18583	0.47468	1461.95	1172.35	2263.32	1762.41	1893.96	1641.32	1107.97	1157.02	1990.51	1464.95	1368.3	1639.03	1419.5	1118.38	1471.27
ENSG00000099901	RANBP1	-0.566207	0.00442109	0.0432664	1472.56	1219.51	1684.38	1165.64	1406.97	1637.58	716.808	968.6	1060.68	1556.79	898.133	1107.21	1115.32	866.85	1184.58
ENSG00000099904	ZDHHC8	0.118242	0.677792	0.870438	1786.17	1273.25	1627.46	885.192	1952.87	1311.56	796.774	1409.23	2201.26	1417.23	1400.44	1541.78	2107.4	1785.92	1771.89
ENSG00000099910	KLHL22	-0.0224193	0.927331	0.9737	1377.06	757.808	856.417	782.85	1228.28	993.948	644.549	578.019	965.73	949.921	956.401	992.737	1117.07	749.355	878.976
ENSG00000099917	MED15	-0.0809976	0.68284	0.872398	2169.34	1431.17	2093.46	2110.64	1922.44	1841.23	1188.9	1691.86	1962.72	1840.42	1842.48	2501.09	1876.65	1537.01	1607.64
ENSG00000099940	SNAP29	-0.118356	0.625737	0.844258	720.363	581.242	554.047	402.722	694.159	692.213	659.964	636.901	382.123	518.63	478.2	350.497	627.588	530.902	437
ENSG00000099942	CRKL	0.137844	0.397154	0.692916	1102.36	953.018	919.559	1144.37	1621.01	1203.2	1046.31	1194.31	1015.52	984.136	1111.11	1056.56	1279.65	1154.93	991.461
ENSG00000099949	LZTR1	0.0883597	0.813937	0.930553	1772.02	1153.71	2917.86	4241.21	3240.06	1840.3	1148.43	1750.74	2475.7	1461.35	1634.52	2055.37	2177.33	1695.41	3106.78
ENSG00000099953	MMP11	0.387953	0.645661	0.854862	68.3815	5.48342	29.3476	9.30382	23.5641	6.53913	3.85381	146.222	56.7395	59.4263	24.1109	37.4809	41.9558	47.8682	33.8451
ENSG00000099954	CECR2	-0.376974	0.523204	0.784806	189.817	140.375	444.661	18.6076	219.932	202.713	178.238	129.539	302.225	385.371	326.502	379.874	451.899	333.337	509.667
ENSG00000099956	SMARCB1	-0.480461	0.0768263	0.288704	3344.8	1467.36	3136.64	2113.3	2982.82	3647.9	1284.28	1563.3	2548.65	2919.09	2875.23	2316.72	2701.78	2185.4	2436.85
ENSG00000099957	P2RX6	-0.12891	0.732208	0.895593	887.78	674.46	739.916	1059.31	365.243	917.346	441.261	327.773	1091.95	650.088	570.626	1199.39	723.737	532.643	568.398
ENSG00000099958	DERL3	2.1154	0.00614632	0.054447	207.502	40.5773	148.517	124.937	1127.15	22.4199	143.554	323.848	812.88	99.0439	613.824	161.066	612.729	408.185	103.526
ENSG00000099960	SLC7A4	-0.719268	0.075193	0.285165	356.055	400.289	450.886	204.684	331.861	453.068	129.102	62.8069	292.961	341.251	253.165	185.378	326.031	237.601	245.874
ENSG00000099968	BCL2L13	-0.0911682	0.776633	0.91511	1081.13	1038.56	1141.89	1080.57	2407.46	1531.09	1160.96	976.45	1046.79	1838.61	1941.94	1571.16	1187	1123.6	2324.36
ENSG00000099974	DDTL	0.732973	0.100723	0.338294	29.4748	70.1877	52.47	67.7849	110.948	49.5105	115.614	52.9933	158.639	42.3187	72.3328	51.6628	124.993	41.7759	62.7129
ENSG00000099977	DDT	0.290066	0.383274	0.682168	476.312	299.394	227.666	204.684	591.066	344.705	670.562	323.848	393.703	351.156	315.451	316.055	387.217	243.693	293.656
ENSG00000099984	GSTT2	0.973158	0.531668	0.790419	5.89495	2.19337	14.2291	0	81.4925	1.86832	52.0264	47.1051	8.10565	9.90439	1.00462	0	5.24447	0	0.995443
ENSG00000099985	OSM	1.76291	0.275563	0.584993	2.35798	1.09668	4.44661	13.2912	0	3.73664	2.89035	73.6018	13.8954	6.30279	0	2.02599	0.874078	0	86.6036
ENSG00000099991	CABIN1	0.0864342	0.741499	0.900412	2398.07	1252.41	2470.54	2198.36	2097.2	1506.8	1206.24	1413.15	2239.47	1744.07	2100.67	2823.22	2203.55	2303.77	2063.55
ENSG00000099992	TBC1D10A	1.07312	2.4862e-05	0.000792493	537.62	505.571	315.709	486.457	970.055	279.314	471.128	623.162	830.25	314.239	569.621	423.433	775.308	805.057	653.011
ENSG00000099994	SUSD2	0.166664	0.844059	0.943879	23.5798	14.2569	40.0195	35.8861	28.4733	18.6832	75.1492	380.767	125.059	153.068	21.0971	53.6888	100.519	45.2572	46.7858
ENSG00000099995	SF3A1	-0.127761	0.292449	0.601962	3058.3	2142.92	3172.21	2893.49	2806.09	3159.33	2834.47	2759.58	2767.5	3005.53	2739.61	2621.64	3155.42	3369.05	3032.12
ENSG00000099998	GGT5	-1.47353	NA	NA	55.4126	75.6711	96.0467	106.329	130.584	63.523	231.228	3783.13	1330.48	1721.56	149.689	82.0527	194.045	123.587	96.558
ENSG00000099999	RNF215	0.40565	0.344488	0.651723	404.394	140.375	260.571	119.62	386.844	178.425	180.165	334.643	537.288	207.992	249.146	183.352	414.313	325.504	152.303
ENSG00000100003	SEC14L2	-0.425513	0.430373	0.720302	225.187	189.726	403.752	26.5823	182.622	138.256	143.554	511.287	222.326	278.223	250.151	111.43	221.142	222.805	135.38
ENSG00000100012	SEC14L3	2.93764	0.221499	0.520951	0	0	0.889322	1.32912	48.11	0	0.963451	114.819	0	0.900399	0	1.013	2.62224	0.870332	0
ENSG00000100014	SPECC1L	-0.362829	0.148607	0.421036	1286.28	710.651	1594.55	801.457	1483.56	1518.01	711.027	1015.7	1154.48	1277.67	1469.76	1363.49	1165.15	1068.77	1424.48
ENSG00000100023	PPIL2	-0.310355	0.106102	0.348819	1017.47	946.438	1750.18	1604.24	1310.75	1340.52	997.172	902.849	1351.33	1144.41	1145.27	1094.04	1204.48	992.178	1098.97
[truncated: 17,502 more rows]

## Sheet: Sheet1
ID	Gene.name	log2FoldChange	padj
ENSG00000136997	MYC	3.03447	0.00512069
ENSG00000223349	KLF2P3	2.25292	0.0116237
ENSG00000139352	ASCL1	5.63175	1.29322e-11
ENSG00000130816	DNMT1	0.0395903	0.958747
ENSG00000111206	FOXM1	1.29668	0.161238
ENSG00000127528	KLF2	0.560813	0.598032
