# Supplementary material for: The diverging role of O-GlcNAc Transferase in corticotroph and somatotroph adenomas
Source: Research Square preprint supplement (doi:10.21203/rs.3.rs-4350199/v1), 2024-05-10
Supplement: Supplementary file 5 [file 523e02b849da9591af4dccaa.xlsx]

## Sheet: Differential_expression_analysi
ID	Gene.name	log2FoldChange	pvalue	padj	TB055	TB101	TB586	TB596	TB644	TB660	TB675	TB779	TB789	TB836
ENSG00000000003	TSPAN6	-1.09784	3.16737e-05	0.000327758	1390.24	1453.96	1035.28	625.522	534.685	757.207	773.92	429.086	1471.8	1056.63
ENSG00000000419	DPM1	-0.0749018	0.557859	0.723194	548.054	618.22	691.044	522.784	666.446	668.644	723.062	671.81	669.832	654.246
ENSG00000000457	SCYL3	0.53881	0.000434848	0.00307987	219.01	239.378	197.441	332.763	394.33	227.605	273.083	280.906	238.104	225.775
ENSG00000000460	C1orf112	-0.0172488	0.957399	0.977299	44.4368	52.0387	52.3648	58.1881	62.0616	35.4249	58.5968	28.1815	43.1727	64.2204
ENSG00000000938	FGR	-0.103894	0.885771	0.93859	78.2934	18.7339	90.1362	27.2757	18.1411	20.3693	27.64	103.635	34.0149	104.358
ENSG00000000971	CFH	1.49982	0.111878	0.250426	228.532	336.17	145.076	79.0995	49.6493	70.8497	130.461	2204.52	559.937	454.56
ENSG00000001036	FUCA2	0.0470863	0.864131	0.92581	853.821	1128.2	714.222	897.37	1127.61	1588.81	679.944	1112.71	1217.99	903.1
ENSG00000001084	GCLC	0.253976	0.363338	0.557576	1151.12	2124.22	1461.07	1672.91	1361.54	1550.72	1017.15	1656.34	1013.91	858.948
ENSG00000001167	NFYA	-0.025034	0.823684	0.902892	518.429	509.98	479.868	519.147	478.352	473.808	509.682	432.722	497.141	408.402
ENSG00000001460	STPG1	-0.0600037	0.733967	0.847099	543.822	379.883	593.182	504.6	555.69	630.563	633.509	493.631	469.667	526.808
ENSG00000001461	NIPAL3	-0.533807	0.000609118	0.0040739	1099.28	1037.65	1409.56	782.812	916.602	1438.25	1202.89	807.263	1301.72	976.351
ENSG00000001497	LAS1L	-0.255745	0.23255	0.415671	1366.96	1722.48	998.366	1291.05	902.28	1263.78	1044.79	911.808	995.59	1258.32
ENSG00000001561	ENPP4	0.465407	0.0397507	0.11784	900.374	1138.61	967.462	1220.13	1576.37	944.073	1347.73	1306.35	1032.22	604.073
ENSG00000001617	SEMA3F	1.01567	0.216857	0.397099	506.791	203.992	230.062	2042.04	71.6096	88.5622	341.63	327.269	557.321	889.051
ENSG00000001626	CFTR	-3.65669	5.87128e-09	1.47008e-07	47.6109	111.363	30.9038	7.27351	1.90959	54.0229	102.821	10.909	155.684	92.3169
ENSG00000001629	ANKIB1	0.251488	0.0790792	0.195879	1240	1062.63	1075.63	1537.44	1150.53	1040.61	1089.02	1138.17	1117.26	876.007
ENSG00000001630	CYP51A1	-0.629931	0.0144032	0.0539664	169.283	261.234	125.332	101.829	131.762	171.811	169.157	98.1807	170.074	131.451
ENSG00000001631	KRIT1	-0.169977	0.149163	0.306019	1030.51	1031.41	1003.52	885.55	930.924	1053	1137.66	898.171	1074.09	797.738
ENSG00000002016	RAD52	0.182809	0.405668	0.596976	316.348	292.458	236.071	432.774	269.252	304.654	266.45	241.815	218.48	305.047
ENSG00000002330	BAD	0.299071	0.00587859	0.0264586	1263.27	1165.67	1482.53	1416.52	1705.26	1283.27	1201.79	1665.44	1291.26	1387.76
ENSG00000002549	LAP3	0.0128173	0.948287	0.97285	751.194	823.253	770.021	828.271	556.645	699.641	639.037	989.988	944.567	866.976
ENSG00000002586	CD99	-1.00502	0.163174	0.326525	1533.07	1635.06	832.687	148.198	165.179	682.814	462.141	1683.62	1658.88	2547.74
ENSG00000002587	HS3ST1	-0.843074	0.322396	0.514726	35.9727	60.3649	31.7623	9.09189	12.4123	15.9412	28.7456	81.8172	193.623	67.2308
ENSG00000002745	WNT16	0.524622	0.755642	0.860007	37.0307	20.8155	20.6026	20.0022	0.954794	2.65687	0	29.0906	0	0
ENSG00000002746	HECW1	3.70138	0.000744444	0.00483491	1.05802	0	2.57532	98.1924	2.86438	6.19935	7.7392	27.2724	1.30826	4.01378
ENSG00000002822	MAD1L1	-0.352629	0.0553817	0.15086	785.05	772.255	597.474	584.609	400.059	655.36	583.757	519.085	554.704	531.825
ENSG00000002834	LASP1	-0.727545	0.0636205	0.167302	3855.42	2880.86	4620.12	754.627	2663.88	4064.12	3970.21	3592.69	2709.42	4987.12
ENSG00000002919	SNX11	0.29996	0.121805	0.265961	445.426	448.574	493.603	364.585	718.96	454.324	436.712	601.811	472.284	442.519
ENSG00000002933	TMEM176A	2.46095	0.00129296	0.00758478	42.3208	37.4679	84.1271	1186.49	625.39	107.16	33.168	354.541	447.427	167.575
ENSG00000003056	M6PR	-0.616273	0.000440087	0.00310648	2017.64	2331.34	1431.88	1063.75	1252.69	1730.5	1428.43	1139.08	1781.86	1638.62
ENSG00000003096	KLHL13	-0.608596	0.0845496	0.205451	88.8736	170.687	221.478	87.2822	94.5246	240.889	202.325	187.271	167.458	220.758
ENSG00000003137	CYP26B1	-0.996455	0.372977	0.566466	281.433	563.059	13.735	38.186	15.2767	20.3693	29.8512	209.998	290.435	28.0964
ENSG00000003147	ICA1	-0.000728237	0.99801	0.998964	788.224	739.991	907.371	844.637	1229.77	949.387	1347.73	545.448	652.824	729.504
ENSG00000003249	DBNDD1	0.81007	0.00297418	0.015174	330.102	205.033	402.608	620.067	494.583	361.334	305.146	591.811	208.014	456.567
ENSG00000003393	ALS2	-0.509357	8.12634e-05	0.000729938	809.385	798.274	827.536	591.882	624.435	790.86	835.833	451.813	808.508	669.297
ENSG00000003400	CASP10	-0.870859	0.0478389	0.135205	70.8873	45.7941	81.5518	34.5492	24.8246	44.2811	51.9632	60.9084	88.962	130.448
ENSG00000003402	CFLAR	-0.276321	0.203641	0.380557	957.507	939.82	924.54	701.894	761.926	809.458	789.398	1001.81	1098.94	1448.97
ENSG00000003436	TFPI	1.11691	NA	NA	73.0033	52.0387	54.0817	22.7297	21.0055	15.9412	44.224	433.631	31.3984	242.833
ENSG00000003509	NDUFAF7	0.323901	0.145422	0.300653	186.211	202.951	277.276	377.314	321.766	268.343	304.04	321.814	365.006	301.033
ENSG00000003756	RBM5	0.0679118	0.707619	0.829795	3896.68	3945.58	3220.87	4912.35	3615.81	3312.23	3066.93	2850.88	4124.96	3764.92
ENSG00000003987	MTMR7	0.590899	0.000895138	0.00563316	511.023	452.737	453.256	870.094	692.226	557.056	557.222	597.266	448.735	365.254
ENSG00000003989	SLC7A2	-0.151818	0.627143	0.775558	136.484	148.831	145.076	117.285	149.903	190.409	122.722	212.725	272.119	229.789
ENSG00000004059	ARF5	0.480537	0.00428446	0.0204919	2307.54	2739.32	3032.01	2700.29	4036.87	2877.39	2573.84	4372.68	2320.86	2725.35
ENSG00000004139	SARM1	-0.0888944	0.652312	0.792748	761.774	776.418	562.278	750.081	583.379	742.151	517.421	500.903	537.697	653.242
ENSG00000004142	POLDIP2	0.591964	7.35692e-08	1.48987e-06	1505.56	1317.62	1544.33	2149.32	2286.73	1648.14	1546.73	2453.61	1363.21	1735.96
ENSG00000004399	PLXND1	-1.13853	0.116479	0.25782	2445.08	1112.59	1129.71	427.319	217.693	437.497	1288.02	1853.61	1261.17	5161.72
ENSG00000004455	AK2	-0.48378	0.00263939	0.0137695	1492.87	2073.22	2279.16	1526.53	1506.67	2197.23	2116.12	1599.07	2541.96	2415.29
ENSG00000004468	CD38	-1.14373	0.209363	0.387661	60.3071	139.464	11.1597	26.3665	11.4575	4.42811	16.584	25.4542	75.8794	19.0654
ENSG00000004478	FKBP4	0.171342	0.183137	0.353631	2751.91	2673.75	2580.47	2973.96	3043.88	2837.53	2367.09	2459.97	2200.5	2151.38
ENSG00000004487	KDM1A	-0.350494	0.00563867	0.0256343	2969.86	2955.8	2922.13	2726.66	2281.96	3334.37	3293.58	1997.25	2689.79	2675.18
ENSG00000004534	RBM6	0.246289	0.290819	0.482949	3807.81	3858.15	2054.25	3924.97	3321.73	2404.46	2315.13	2940.87	2532.8	3068.53
ENSG00000004660	CAMKK1	1.16571	2.77422e-15	1.84824e-13	1115.15	1261.42	1212.98	2167.51	3087.8	1008.72	1377.58	2654.51	1212.76	1039.57
ENSG00000004700	RECQL	-0.360304	0.0586826	0.15754	267.679	326.803	242.939	236.389	153.722	277.2	270.872	269.997	306.134	287.988
ENSG00000004766	VPS50	0.0158883	0.926708	0.961373	432.73	600.527	393.166	540.058	483.126	533.144	484.253	443.631	546.855	396.36
ENSG00000004776	HSPB6	0.723312	0.333851	0.526818	88.8736	85.3435	671.3	872.822	252.066	498.605	95.0816	183.634	293.051	116.4
ENSG00000004777	ARHGAP33	-0.063256	0.876671	0.933087	3866	2352.15	1686.83	3737.68	1210.68	1704.82	1581.01	1212.71	1971.56	1858.38
ENSG00000004779	NDUFAB1	0.40827	0.00257238	0.0134609	1169.11	1407.13	1461.07	1496.53	1917.23	1086.66	1318.98	1590.89	1146.04	1208.15
ENSG00000004799	PDK4	0.671077	0.161348	0.324451	621.057	674.422	444.672	1771.1	361.867	271.886	411.283	550.903	707.771	802.755
ENSG00000004809	SLC22A16	4.18749	0.000861877	0.00546948	3.17406	2.08155	0	69.0984	42.0109	0	3.3168	82.7263	17.0074	0
ENSG00000004838	ZMYND10	-1.09397	0.0202059	0.070288	234.88	154.035	296.162	153.653	88.7959	210.778	256.499	182.725	737.861	229.789
ENSG00000004864	SLC25A13	0.0605266	0.692435	0.819403	949.043	937.738	761.436	966.468	918.512	857.282	809.299	689.992	716.929	728.5
ENSG00000004866	ST7	-0.275047	0.0485266	0.136739	694.061	846.15	633.529	540.058	612.023	687.242	802.665	588.175	664.599	586.011
ENSG00000004897	CDC27	-0.164812	0.030677	0.0971861	1229.42	1147.97	1243.88	1123.76	1182.99	1293.89	1253.75	1066.35	1313.5	1340.6
ENSG00000004961	HCCS	0.0322077	0.864382	0.925917	226.416	220.644	291.011	250.936	317.946	363.105	310.674	288.178	261.653	279.961
ENSG00000004975	DVL2	0.223754	0.191906	0.365403	1907.61	1849.46	1358.91	2180.24	1857.07	1597.66	1493.67	1505.44	1283.41	1583.43
ENSG00000005001	PRSS22	-1.36974	7.20628e-05	0.00065955	327.986	525.591	339.084	106.375	96.4342	451.667	204.536	209.088	370.239	264.909
ENSG00000005007	UPF1	0.443289	0.0177487	0.0634619	3128.56	3232.65	2786.5	5379.67	3186.15	2533.76	2571.63	3298.14	2833.7	3273.23
ENSG00000005020	SKAP2	-0.207227	0.505753	0.682073	114.266	134.26	192.291	62.7341	140.355	145.242	102.821	157.271	136.06	144.496
ENSG00000005022	SLC25A5	0.294276	0.212506	0.391728	2087.47	3710.36	2260.27	2342.98	3108.81	1782.76	2499.76	3158.14	2013.42	2028.96
ENSG00000005059	MCUB	2.33665	7.88183e-08	1.59105e-06	133.31	48.9164	119.323	198.203	660.718	110.703	110.56	800.9	153.067	91.3134
ENSG00000005075	POLR2J	0.464379	0.0185756	0.0657329	755.426	792.03	1065.32	904.643	1501.89	1039.72	1001.67	1347.26	760.102	931.196
ENSG00000005100	DHX33	0.533071	0.000198365	0.00158848	281.433	250.827	257.532	398.225	477.397	294.026	296.301	329.087	265.578	296.016
ENSG00000005108	THSD7A	0.744554	0.0147385	0.0549453	284.607	261.234	269.55	534.603	408.652	239.118	229.965	551.812	563.862	236.813
ENSG00000005156	LIG3	-0.24914	0.178261	0.347276	440.136	473.553	435.229	457.322	278.8	503.919	347.158	347.269	418.645	385.323
ENSG00000005175	RPAP3	-0.263764	0.106705	0.241834	653.856	774.336	671.3	593.701	615.842	861.71	863.473	610.902	736.553	538.849
ENSG00000005187	ACSM3	-1.80343	0.00171707	0.00961501	37.0307	135.301	36.9129	22.7297	17.1863	53.1373	35.3792	8.18172	64.105	30.1033
ENSG00000005189	REXO5	-0.340117	0.115236	0.255775	106.86	126.975	115.031	67.28	97.389	88.5622	87.3424	74.5446	88.962	91.3134
ENSG00000005194	CIAPIN1	0.818545	3.20431e-10	1.03449e-08	933.173	1083.45	878.184	1729.28	1490.43	959.128	803.771	1517.26	758.794	847.91
ENSG00000005206	SPPL2B	1.03863	0.00188614	0.0103926	2965.63	2754.93	1875.69	8022.69	3388.56	1564.89	1816.5	3148.15	2620.45	2940.09
ENSG00000005238	FAM214B	0.484797	0.0161242	0.0589614	648.566	527.673	557.986	971.923	697	469.38	560.539	696.356	434.344	744.555
ENSG00000005243	COPZ2	0.898137	NA	NA	45.4948	72.8542	73.8259	19.093	28.6438	22.1405	71.864	389.995	82.4207	179.616
ENSG00000005249	PRKAR2B	-0.159751	0.486214	0.665777	482.457	538.081	832.687	502.782	611.068	929.017	682.155	689.992	583.486	651.235
ENSG00000005302	MSL3	-0.50043	0.000153868	0.00126793	429.556	463.145	379.431	294.577	277.845	437.497	354.898	326.36	419.953	482.657
ENSG00000005339	CREBBP	0.072811	0.527714	0.699698	1771.12	1409.21	1582.96	1882.93	1542.95	1656.11	1762.33	1614.53	1420.78	1578.42
ENSG00000005379	TSPOAP1	-0.734587	0.00166935	0.00940083	4662.69	3980.96	3081.8	3117.61	1894.31	3328.17	3400.83	1480.89	3248.42	3506.03
ENSG00000005421	PON1	1.09674	0.254172	0.441595	3.17406	8.3262	13.735	41.8227	22.9151	8.85622	34.2736	10.909	14.3909	0
ENSG00000005436	GCFC2	-0.0767525	0.590102	0.748494	372.423	383.005	370.846	431.865	359.957	454.324	467.669	338.178	378.089	354.216
ENSG00000005448	WDR54	-0.0688122	0.632573	0.779613	904.606	1089.69	969.179	897.37	1085.6	931.674	923.176	973.625	1284.72	1135.9
ENSG00000005469	CROT	-0.255147	0.372876	0.566389	120.614	147.79	285.002	169.109	163.27	247.088	173.579	179.089	259.036	190.654
ENSG00000005471	ABCB4	-1.3555	0.0689169	0.177242	14.8123	6.24465	73.8259	10.9103	9.54794	19.4837	11.056	9.0908	31.3984	19.0654
ENSG00000005483	KMT2E	0.0866462	0.560104	0.724696	1441.02	1240.6	1072.19	1459.25	1356.76	1666.74	1478.19	1462.71	1317.42	1186.07
ENSG00000005486	RHBDD2	0.325755	0.0113978	0.0451268	8558.32	10527.4	9109.77	12875	10884.7	8789.8	8129.48	12034.4	10413.8	11112.1
ENSG00000005513	SOX8	-1.20325	0.270718	0.460411	26.4505	5.20387	10.3013	4.54595	0	24.7974	14.3728	25.4542	7.84959	72.248
ENSG00000005700	IBTK	-0.0322795	0.784604	0.879358	1097.17	1140.69	1017.25	1069.21	1012.08	1249.61	1177.46	1144.53	1115.95	900.089
ENSG00000005801	ZNF195	-0.154361	0.474597	0.657172	274.027	330.966	256.674	274.575	321.766	361.334	352.686	202.725	218.48	278.957
ENSG00000005810	MYCBP2	-0.0729707	0.650227	0.791796	1761.6	1540.35	1438.75	1457.43	1635.56	1755.3	1651.77	1309.08	1547.68	1108.81
ENSG00000005812	FBXL3	0.0374603	0.759476	0.86312	715.221	778.5	913.38	791.904	807.756	768.72	911.014	897.262	877.846	713.449
ENSG00000005844	ITGAL	-0.144046	0.714844	0.834479	92.0477	70.7727	133.917	89.1006	48.6945	58.451	54.1744	114.544	115.127	126.434
ENSG00000005882	PDK2	0.715362	0.000477325	0.00332821	534.3	624.465	576.872	627.341	1023.54	534.03	673.31	1131.8	443.502	566.946
ENSG00000005884	ITGA3	-0.0113749	0.955192	0.976584	6286.75	6172.84	5475.13	7655.37	4332.86	6356.99	4636.89	4769.04	5816.55	4665.01
ENSG00000005889	ZFX	0.0874727	0.631655	0.778816	640.102	574.508	690.186	772.811	850.722	1017.58	836.939	761.809	720.854	756.597
ENSG00000005893	LAMP2	0.165063	0.361896	0.556087	2845.01	3356.5	2300.62	3110.34	3846.87	2598.41	3668.38	3209.96	3702.39	2691.24
ENSG00000005961	ITGA2B	1.21858	0.0239528	0.0800293	264.505	228.97	71.2505	538.24	232.97	58.451	116.088	170.907	121.669	84.2893
ENSG00000005981	ASB4	3.21292	0.000507366	0.0035027	155.529	2.08155	117.606	814.634	443.979	8.85622	24.3232	503.63	111.203	24.0827
ENSG00000006007	GDE1	0.27454	0.214717	0.39425	603.071	525.591	792.34	857.366	1058.87	691.671	648.987	750.9	962.883	921.162
ENSG00000006015	REX1BD	-0.303867	0.0655455	0.170926	1043.21	1409.21	1207.83	1078.3	914.693	1301.86	876.741	895.444	1144.73	1334.58
ENSG00000006016	CRLF1	0.838315	0.02665	0.0867656	56.075	45.7941	42.922	154.562	57.2877	84.1341	58.5968	79.9991	56.2554	37.1274
ENSG00000006025	OSBPL7	0.701986	0.174653	0.34244	1315.12	1082.41	1132.28	3365.82	547.097	783.775	651.198	617.266	622.734	910.124
ENSG00000006042	TMEM98	0.508303	0.464233	0.649934	137.542	83.262	77.2596	35.4584	176.637	163.84	60.808	450.904	238.104	327.123
ENSG00000006047	YBX2	-0.645386	0.303297	0.495783	52.901	26.0194	36.9129	45.4595	4.77397	40.7386	15.4784	21.8179	61.4884	30.1033
ENSG00000006062	MAP3K14	2.32897	2.60956e-36	1.04682e-33	205.256	222.726	188.857	1380.15	772.428	195.722	204.536	963.625	218.48	212.73
ENSG00000006071	ABCC8	0.108164	0.845492	0.915771	1591.26	576.589	268.692	1658.36	497.448	433.069	1494.77	658.174	966.808	761.614
ENSG00000006118	TMEM132A	-0.930991	0.0584054	0.15704	5479.48	7817.26	4150.56	4536.85	1161.03	4059.69	3529.07	1090.9	2150.79	3014.35
ENSG00000006125	AP2B1	-0.213199	0.0356541	0.108633	4734.64	4736.57	4659.61	4214.09	3790.53	5324.36	4698.8	4023.59	4452.03	3927.48
ENSG00000006194	ZNF263	-0.0437905	0.722824	0.839687	821.023	1001.23	934.841	909.189	889.868	1051.23	825.883	807.263	794.117	835.869
ENSG00000006210	CX3CL1	-1.90826	NA	NA	1111.98	1011.63	1122.84	126.377	68.7452	1231.01	416.811	613.629	1237.62	952.268
ENSG00000006282	SPATA20	-1.49409	1.35021e-17	1.15189e-15	2369.96	2915.21	1995.87	987.38	614.887	2123.72	2423.47	870.899	2210.97	2219.62
ENSG00000006283	CACNA1G	-1.20556	0.190649	0.363816	25.3925	172.769	46.3558	4.54595	6.68356	30.9968	101.715	67.2719	18.3157	27.093
ENSG00000006327	TNFRSF12A	1.98663	1.41071e-07	2.67312e-06	679.248	763.929	633.529	2311.16	1559.18	728.867	392.488	4988.12	1034.84	983.375
ENSG00000006377	DLX6	2.13973	NA	NA	7.40613	3.12232	7.72596	6.36433	3.81918	1.77124	8.8448	171.816	14.3909	53.1825
ENSG00000006432	MAP3K9	-1.42134	1.46982e-09	4.15471e-08	702.525	729.583	534.808	258.21	243.473	805.916	645.67	192.725	520.689	399.371
ENSG00000006451	RALA	-0.172527	0.435328	0.62534	781.876	645.28	1053.31	651.889	905.145	923.704	1132.13	701.81	684.223	717.462
ENSG00000006453	BAIAP2L1	0.25038	0.523259	0.696177	241.228	179.013	251.523	445.503	364.731	242.66	266.45	339.996	680.298	397.364
ENSG00000006459	KDM7A	0.533246	0.0591046	0.15847	113.208	95.7513	134.775	138.197	217.693	109.817	145.939	239.088	204.089	157.541
ENSG00000006468	ETV1	0.823628	0.107497	0.243074	78.2934	79.0989	76.4012	265.483	90.7054	220.52	71.864	239.088	64.105	193.665
ENSG00000006530	AGK	-0.351955	0.00903932	0.0375879	713.105	655.688	650.698	600.065	425.838	659.788	606.974	468.176	574.328	588.018
ENSG00000006534	ALDH3B1	0.882647	NA	NA	74.0613	49.9572	71.2505	37.2768	36.2822	42.5098	33.168	263.633	982.507	94.3237
ENSG00000006555	TTC22	-0.451058	0.542991	0.711535	113.208	205.033	428.362	11.8195	308.399	354.249	126.038	149.998	90.2703	181.623
ENSG00000006576	PHTF2	0.676633	0.0160642	0.0588563	137.542	176.932	163.962	436.411	254.93	194.837	186.846	182.725	239.412	177.61
ENSG00000006607	FARP2	0.0250205	0.898333	0.946267	817.849	702.523	586.315	904.643	589.108	767.834	616.925	562.721	661.982	562.932
ENSG00000006611	USH1C	4.31903	0.00325114	0.0163241	49.7269	29.1417	4.2922	2247.52	323.675	187.752	7.7392	82.7263	31.3984	0
ENSG00000006625	GGCT	0.133069	0.507754	0.683799	229.59	195.666	312.472	300.942	303.625	279.856	307.357	306.36	365.006	249.858
ENSG00000006634	DBF4	-1.37984	4.09552e-06	5.39978e-05	53.959	63.4873	72.109	18.1838	27.689	62.8791	85.1312	34.5451	92.8868	59.2032
ENSG00000006638	TBXA2R	-1.65309	0.018188	0.0647112	80.4095	48.9164	60.9493	10.9103	9.54794	15.0556	43.1184	36.3632	26.1653	142.489
ENSG00000006652	IFRD1	-0.123825	0.587564	0.746441	970.204	940.86	927.974	620.067	823.987	1195.59	1170.83	1267.26	859.53	827.841
ENSG00000006695	COX10	0.150207	0.342808	0.537086	159.761	198.788	172.546	213.659	177.592	144.356	163.629	184.543	167.458	204.703
ENSG00000006704	GTF2IRD1	0.56365	0.00058562	0.00393769	2058.91	2236.63	1892	3256.72	2836.69	1798.7	1672.77	2195.43	1511.05	1913.57
ENSG00000006712	PAF1	0.467999	1.26503e-05	0.000146055	2173.17	1999.33	2474.88	2620.28	3372.33	2252.14	2216.73	3086.33	2128.55	2067.09
ENSG00000006715	VPS41	-0.8058	1.24289e-05	0.00014394	2940.24	2596.73	2689.49	1428.34	1685.21	2347.78	3044.82	1200.9	2053.98	1923.6
ENSG00000006740	ARHGAP44	-0.148561	0.626265	0.775087	1015.7	1025.16	1243.88	492.781	1533.4	1526.81	1309.03	1282.71	1132.96	1303.47
ENSG00000006744	ELAC2	1.11435	4.20928e-10	1.32934e-08	1242.11	1332.19	966.604	3158.52	2110.1	1060.09	1026	2025.43	1216.69	1019.5
ENSG00000006747	SCIN	-0.314068	0.7263	0.841858	23.2764	40.5902	71.2505	10.0011	33.4178	15.0556	29.8512	128.18	239.412	79.2721
ENSG00000006756	ARSD	-2.51128	4.57316e-06	5.94227e-05	518.429	684.83	213.752	20.9114	60.152	442.811	270.872	147.271	641.05	266.916
ENSG00000006757	PNPLA4	0.309221	0.182793	0.353149	454.948	512.061	711.647	765.537	635.893	858.167	691	844.536	486.675	512.76
ENSG00000006831	ADIPOR2	-0.30427	0.0339431	0.104638	2428.15	2734.12	2412.22	1861.11	2413.72	2328.3	2857.98	1700.89	2141.63	2312.94
ENSG00000006837	CDKL3	-0.248503	0.266735	0.456188	52.901	50.998	44.6389	41.8227	44.8753	45.1667	55.28	36.3632	49.7141	43.1481
ENSG00000007001	UPP2	0.469761	0.170422	0.336937	47.6109	40.5902	60.0908	85.4638	57.2877	28.3399	47.5408	38.1814	34.0149	46.1584
ENSG00000007047	MARK4	-0.00755573	0.972308	0.985697	1467.47	1482.06	1340.88	1653.82	1186.81	1375.37	1553.37	1191.8	795.425	1441.95
ENSG00000007062	PROM1	1.97235	0.140506	0.294049	10.5802	8.3262	5.15064	323.671	552.826	15.0556	5.528	154.544	557.321	12.0413
ENSG00000007080	CCDC124	0.163833	0.207432	0.385693	1526.72	1399.84	1673.1	1510.16	1664.21	1703.94	1670.56	1985.43	1317.42	1451.98
ENSG00000007129	CEACAM21	-1.29142	0.134959	0.286416	6.34812	4.1631	19.7441	2.72757	6.68356	2.65687	7.7392	6.36356	18.3157	31.1068
ENSG00000007168	PAFAH1B1	0.0934361	0.308857	0.501408	3984.5	3428.31	3614.03	4184.09	4309.94	3886.99	4122.78	3598.14	3678.84	3729.8
ENSG00000007171	NOS2	-2.72189	0.00848341	0.0357582	41.2627	74.9358	29.187	28.1849	5.72877	30.1111	42.0128	40.9086	765.335	170.585
ENSG00000007174	DNAH9	-1.58572	9.61872e-05	0.00084428	220.068	173.809	309.038	55.4605	141.31	188.637	222.226	82.7263	518.073	326.119
ENSG00000007202	KIAA0100	-0.202981	0.173951	0.341704	4917.67	4291.11	4187.47	4637.77	3405.75	4525.53	3635.21	3136.33	4478.19	3992.7
ENSG00000007237	GAS7	-1.95821	0.00438228	0.0208435	685.596	681.708	721.09	44.5503	28.6438	1034.41	857.945	510.903	439.577	876.007
ENSG00000007255	TRAPPC6A	0.282056	0.159732	0.322098	491.979	446.492	518.498	365.494	623.481	453.438	465.458	725.446	485.366	428.471
ENSG00000007264	MATK	-0.680998	0.0459964	0.131488	243.344	395.494	345.093	150.016	138.445	495.948	288.562	334.542	327.066	234.806
ENSG00000007312	CD79B	-0.360163	0.616584	0.767791	35.9727	21.8563	12.8766	15.4562	6.68356	6.19935	8.8448	31.8178	40.5562	36.124
ENSG00000007314	SCN4A	-0.351137	0.668836	0.803712	93.1057	27.0601	36.9129	12.7287	12.4123	5.31373	14.3728	66.3629	36.6314	59.2032
ENSG00000007341	ST7L	0.0538158	0.759321	0.863048	256.041	321.599	281.568	258.21	323.675	329.451	275.294	299.996	312.675	205.706
ENSG00000007350	TKTL1	-1.68891	0.0708035	0.180738	50.7849	42.6718	11.1597	2.72757	4.77397	5.31373	6.6336	10.909	3.92479	18.062
ENSG00000007372	PAX6	0.147314	0.725255	0.841306	74.0613	52.0387	98.7206	112.739	130.807	120.445	100.61	46.3631	117.744	47.1619
ENSG00000007376	RPUSD1	0.219947	0.175847	0.344138	529.01	525.591	576.013	742.808	623.481	509.233	542.85	448.177	463.126	487.674
ENSG00000007384	RHBDF1	-0.662056	0.45804	0.644999	217.952	78.0581	104.73	54.5514	19.0959	65.536	81.8144	319.996	160.917	744.555
ENSG00000007392	LUC7L	0.0633013	0.788784	0.882177	2971.98	3082.78	2087.73	3752.22	2368.84	2266.31	2004.45	1999.98	3138.53	2585.88
ENSG00000007402	CACNA2D2	-0.848856	0.0126776	0.0487606	266.621	399.658	328.783	320.944	153.722	708.497	403.544	189.998	310.059	375.288
ENSG00000007516	BAIAP3	-0.962108	0.0536708	0.147208	36239.3	30722.6	26022.8	2755.75	30936.3	32612.1	27055.1	15908	32900.2	39914
ENSG00000007520	TSR3	0.597297	3.30604e-06	4.49726e-05	892.968	894.026	1014.68	1311.05	1368.22	718.239	954.133	1242.71	779.726	793.724
ENSG00000007541	PIGQ	-0.169174	0.463461	0.649287	2916.96	2759.09	2630.26	3486.74	2178.84	2330.96	2289.7	1723.62	2859.87	3600.36
ENSG00000007545	CRAMP1	0.302979	0.071049	0.181168	829.487	692.115	710.788	1151.03	923.286	668.644	789.398	676.356	790.192	723.483
ENSG00000007866	TEAD3	-1.1777	0.162662	0.325877	171.399	60.3649	62.6661	12.7287	35.3274	23.9118	44.224	119.999	146.526	378.298
ENSG00000007923	DNAJC11	-0.147207	0.457311	0.644406	1056.96	1011.63	703.921	895.551	716.096	860.824	784.976	641.811	624.042	779.676
ENSG00000007933	FMO3	-1.01427	0.422478	0.613148	16.9283	176.932	29.187	7.27351	5.72877	12.3987	8.8448	179.089	536.389	125.431
ENSG00000007944	MYLIP	-0.159258	0.675279	0.80698	499.385	296.621	873.034	650.98	557.6	512.775	749.597	656.356	646.283	1281.4
ENSG00000007968	E2F2	-0.195612	0.806422	0.892532	24.3344	27.0601	5.15064	23.6389	3.81918	25.683	6.6336	10.909	6.54132	7.02411
ENSG00000008018	PSMB1	0.176868	0.209839	0.388215	1875.87	2458.31	2283.45	1985.67	2857.7	2111.32	2124.96	2590.88	2070.98	2418.3
ENSG00000008056	SYN1	-0.158577	0.454777	0.642467	3026.99	3408.54	3767.69	3155.8	2728.8	3837.4	3299.11	2515.43	1996.41	2537.71
ENSG00000008083	JARID2	0.0304077	0.828293	0.90569	484.573	417.351	459.265	491.871	438.251	368.419	425.656	361.814	382.013	413.419
ENSG00000008086	CDKL5	-1.14476	4.07051e-09	1.05275e-07	399.931	286.213	412.051	157.29	190.004	440.154	449.979	160.907	308.751	322.106
ENSG00000008118	CAMK1G	-2.51129	8.99595e-10	2.67946e-08	216.894	241.46	553.694	60.9157	112.666	511.889	679.944	91.8171	665.907	660.266
ENSG00000008128	CDK11A	0.447311	0.139303	0.292443	391.467	396.535	268.692	652.798	337.042	228.49	234.387	318.178	310.059	409.405
ENSG00000008130	NADK	0.381428	0.00563668	0.0256343	889.794	927.33	974.33	1437.43	1098.97	982.155	820.355	1178.17	900.086	1157.97
ENSG00000008226	DLEC1	-2.05246	0.0140423	0.0528642	60.3071	48.9164	203.45	68.1892	19.0959	87.6766	19.9008	19.9998	482.75	136.468
ENSG00000008256	CYTH3	1.29088	0.00136778	0.00794214	482.457	417.351	430.937	1961.12	834.49	287.827	482.042	979.989	443.502	1056.63
ENSG00000008277	ADAM22	-0.705917	0.0302602	0.0961291	2470.47	1884.84	1464.5	1360.15	806.801	1408.14	1747.95	878.172	1866.89	748.569
ENSG00000008282	SYPL1	0.638937	0.0348939	0.1068	883.446	1055.35	836.121	1354.69	982.483	495.948	997.251	2038.16	1316.11	974.344
ENSG00000008283	CYB561	1.02276	0.000106295	0.000920146	2293.79	3054.67	3159.06	6376.14	7570.56	2307.93	2898.88	6111.75	5087.84	4235.54
ENSG00000008294	SPAG9	0.0378162	0.820698	0.901506	2460.95	2073.22	1898.01	2956.68	2218.94	2211.4	2339.45	1795.43	2531.49	2333.01
ENSG00000008300	CELSR3	0.327791	0.193791	0.368023	3657.57	3429.35	2346.98	4786.88	3045.79	2659.52	2343.87	2406.34	2196.58	2401.24
ENSG00000008311	AASS	-0.907321	0.00121837	0.00723045	209.488	250.827	161.387	119.104	130.807	242.66	225.542	159.089	300.901	400.374
ENSG00000008323	PLEKHG6	-1.93967	0.000532947	0.00363801	39.1467	222.726	69.5337	16.3654	30.5534	136.386	85.1312	49.9994	109.894	204.703
ENSG00000008324	SS18L2	0.550459	0.000497203	0.00344895	227.474	240.419	272.984	322.762	449.708	285.17	275.294	349.087	213.247	268.923
ENSG00000008382	MPND	0.0870808	0.564951	0.728505	424.266	384.046	337.367	443.684	429.657	417.128	327.258	359.087	353.232	462.588
ENSG00000008394	MGST1	-1.86033	0.129079	0.27734	11.6382	8.3262	4.2922	0.909189	4.77397	44.2811	8.8448	23.6361	164.841	7.02411
ENSG00000008405	CRY1	0.508756	0.0612973	0.162879	355.494	310.151	351.102	698.257	262.568	308.196	400.227	531.812	412.103	312.071
ENSG00000008441	NFIX	2.81722	0.00150827	0.00862398	259.215	111.363	88.4193	5094.19	96.4342	609.308	82.92	1040.9	524.614	387.329
ENSG00000008513	ST3GAL1	-2.28304	3.37638e-07	5.86713e-06	719.453	2047.2	906.513	127.287	120.304	1131.82	1034.84	461.813	1098.94	1118.84
ENSG00000008516	MMP25	-0.836521	0.0669965	0.173629	223.242	199.829	178.556	163.654	49.6493	125.758	124.933	43.6359	87.6537	130.448
ENSG00000008517	IL32	-0.372232	0.490745	0.669217	88.8736	181.095	134.775	81.827	57.2877	65.536	86.2368	187.271	111.203	318.092
ENSG00000008710	PKD1	2.21141	3.70001e-12	1.65308e-10	8057.87	8039.99	6429.72	56776.1	26380	5667.98	6269.86	17463.4	8769.3	7460.61
ENSG00000008735	MAPK8IP2	0.0350914	0.838367	0.911567	9070.4	9505.4	6856.36	7921.77	8892.95	6497.81	6841.45	6333.56	7052.86	6890.65
ENSG00000008838	MED24	0.166005	0.425333	0.615916	2800.58	2368.8	1950.38	3435.83	2092.91	2040.47	1925.95	1954.52	2050.05	2427.33
ENSG00000008853	RHOBTB2	-0.943401	6.0592e-07	9.9253e-06	1261.16	1094.9	1426.73	668.254	779.112	1504.67	1236.06	695.446	1163.05	1925.61
ENSG00000008869	HEATR5B	-0.0369279	0.821826	0.902167	805.153	820.131	842.988	1008.29	703.683	715.582	813.721	594.539	761.41	762.617
ENSG00000008952	SEC62	-0.161691	0.259202	0.447199	4535.73	5543.17	5038.19	4037.71	5362.12	5349.16	5931.54	5106.3	6488.99	4978.09
ENSG00000008988	RPS20	0.274317	0.203154	0.380123	9386.75	11192.5	10957.1	8045.42	16253.5	10294.5	12441.3	15574.4	12486.1	10169.9
ENSG00000009307	CSDE1	-0.127153	0.339585	0.533574	12841.2	9996.64	11297.9	10598.4	10915.2	11409.5	14880.3	10721.7	10577.3	11143.2
ENSG00000009335	UBE3C	-0.0604904	0.652407	0.79278	1291.84	1258.3	1466.22	1446.52	1174.4	1398.4	1457.18	1136.35	1136.88	1130.88
ENSG00000009413	REV3L	0.153137	0.485135	0.665148	758.6	757.684	873.034	1339.24	776.248	1155.74	1011.62	821.809	794.117	811.786
ENSG00000009694	TENM1	2.33869	NA	NA	1167	17.6932	27.4701	798.268	14.3219	99.1896	24.3232	10.909	146.526	11.0379
ENSG00000009709	PAX7	2.28891	0.494002	0.671757	0	0	0	0	0.954794	0	0	1.81816	147.834	0
ENSG00000009724	MASP2	-0.409761	0.248041	0.435071	114.266	103.037	56.6571	80.0087	54.4233	69.9641	54.1744	37.2723	58.8719	75.2583
ENSG00000009780	FAM76A	-0.145365	0.505697	0.682052	507.849	431.922	547.685	647.343	506.041	564.141	702.056	344.541	603.11	509.75
ENSG00000009790	TRAF3IP3	-0.0681378	0.897162	0.945399	27.5085	20.8155	36.0545	32.7308	19.0959	9.74184	14.3728	28.1815	40.5562	47.1619
ENSG00000009830	POMT2	0.306061	0.289187	0.481197	1069.66	1056.39	716.798	1663.82	905.145	743.037	674.416	672.719	1032.22	826.838
ENSG00000009844	VTA1	0.340802	0.00310257	0.0157192	550.17	589.079	716.798	835.545	818.259	688.128	723.062	790.9	605.727	628.156
ENSG00000009950	MLXIPL	-0.223417	0.698041	0.823326	282.491	88.4659	280.71	378.223	61.1068	143.471	216.698	69.9992	147.834	227.782
ENSG00000009954	BAZ1B	0.331416	0.00100368	0.00618408	2145.66	2113.81	1974.41	2850.31	2914.99	2419.52	2363.77	2447.24	2019.96	2190.52
ENSG00000010017	RANBP9	0.434606	0.00748462	0.0322918	1082.35	985.614	1238.73	1443.79	1828.43	1261.13	1135.45	1204.53	906.628	1114.83
ENSG00000010030	ETV7	1.13112	0.0187183	0.0661261	42.3208	67.6504	42.922	91.8281	310.308	110.703	87.3424	105.453	119.052	71.2445
ENSG00000010072	SPRTN	0.18727	0.424969	0.615525	149.181	110.322	187.14	210.023	203.371	170.925	175.79	140.907	206.706	136.468
ENSG00000010165	METTL13	0.201916	0.104434	0.238004	952.217	833.661	796.632	967.377	964.342	780.233	823.672	829.081	672.448	739.538
ENSG00000010219	DYRK4	0.0871124	0.650527	0.791854	340.682	440.248	360.545	267.302	464.985	309.968	323.941	390.905	344.074	347.192
ENSG00000010244	ZNF207	-0.0941783	0.402423	0.593545	2807.98	2733.07	2340.11	2891.22	2307.74	2810.08	2590.42	2197.25	2623.07	2518.64
ENSG00000010256	UQCRC1	0.158397	0.0462525	0.132026	4000.37	4827.11	4291.34	5043.27	4493.26	4267.81	4116.15	4751.76	4157.67	4211.45
ENSG00000010270	STARD3NL	0.0532733	0.791622	0.883203	606.245	1092.81	893.636	821.907	936.653	992.782	1085.7	1020.9	747.019	830.852
ENSG00000010278	CD9	-1.91618	0.00619765	0.0276438	772.354	2377.13	3075.79	144.561	197.642	3041.23	1414.06	1755.43	3915.64	3877.31
ENSG00000010282	HHATL	0.691258	0.476065	0.658092	30.6826	413.188	62.6661	139.106	53.4685	565.912	63.0192	675.447	69.338	49.1688
ENSG00000010292	NCAPD2	-0.0673732	0.678257	0.809152	689.829	465.226	764.012	592.791	672.175	705.841	651.198	571.812	620.118	592.032
ENSG00000010295	IFFO1	-0.0796557	0.796911	0.886742	2086.41	1598.63	1190.66	2113.87	1208.77	1089.31	1095.65	845.445	1475.72	1741.98
ENSG00000010310	GIPR	-1.83633	0.0488441	0.137335	6.34812	29.1417	51.5064	20.0022	3.81918	43.3955	35.3792	39.0905	238.104	121.417
ENSG00000010318	PHF7	0.012998	0.934976	0.965497	171.399	147.79	117.606	142.743	140.355	151.441	156.995	154.544	132.135	135.465
ENSG00000010319	SEMA3G	0.291457	0.67247	0.805208	301.535	159.239	280.71	112.739	94.5246	30.1111	148.15	578.175	236.796	341.171
ENSG00000010322	NISCH	0.367691	0.0324221	0.101078	8814.36	6937.81	6673.51	10188.4	10080.7	6593.45	6515.3	6575.38	6116.14	6893.66
ENSG00000010327	STAB1	-0.717943	0.156656	0.317694	2474.71	1499.76	1373.5	993.744	565.238	890.935	959.661	1740.89	1299.11	4167.3
ENSG00000010361	FUZ	0.495756	0.00304235	0.0154569	812.559	764.97	562.278	943.739	1000.62	557.056	574.912	781.809	643.666	597.049
ENSG00000010379	SLC6A13	-1.24141	0.254718	0.442074	6.34812	12.4893	7.72596	11.8195	4.77397	1.77124	2.2112	1.81816	58.8719	13.0448
ENSG00000010404	IDS	-0.685714	0.00459355	0.0216517	10536.8	10836.5	16803.1	9085.53	9230.95	22077.7	18043.4	9533.53	13226.6	12999.6
ENSG00000010539	ZNF200	0.206497	0.156443	0.317398	156.587	119.689	147.652	176.383	180.456	154.984	168.051	157.271	142.601	149.513
ENSG00000010610	CD4	0.162222	0.708558	0.830571	537.474	316.396	426.645	374.586	306.489	276.314	260.922	867.263	641.05	770.645
ENSG00000010626	LRRC23	-0.454472	0.128243	0.276394	396.757	390.291	543.393	222.751	400.059	405.615	442.24	450.904	805.891	450.546
ENSG00000010671	BTK	-0.64207	0.190454	0.363517	29.6245	22.897	59.2324	27.2757	25.7794	28.3399	28.7456	34.5451	83.729	67.2308
ENSG00000010704	HFE	0.794168	0.23785	0.422223	44.4368	26.0194	20.6026	21.8205	35.3274	11.5131	25.4288	129.998	56.2554	68.2342
ENSG00000010803	SCMH1	-0.247606	0.0989372	0.229349	2171.06	1950.41	2065.41	1776.56	1740.59	2171.54	2564.99	1648.16	1588.23	1795.16
ENSG00000010810	FYN	-0.332233	0.0862373	0.208104	1301.36	1862.99	1358.05	994.653	1314.75	1548.95	1395.27	1330.89	1228.46	1996.85
ENSG00000010818	HIVEP2	0.304945	0.0444563	0.128496	661.262	501.653	612.068	951.012	669.311	641.19	689.894	724.537	638.433	685.352
ENSG00000011007	ELOA	1.00235	2.73373e-15	1.82772e-13	830.545	708.768	977.763	1769.28	1850.39	881.194	796.032	1454.53	873.921	839.883
ENSG00000011009	LYPLA2	0.814763	2.51448e-07	4.49792e-06	860.17	872.169	959.736	1312.87	1977.38	983.926	777.237	1647.25	1072.78	1023.51
ENSG00000011021	CLCN6	0.0431215	0.86499	0.926147	1391.3	1579.9	976.905	1501.98	947.156	862.596	1054.74	953.625	837.29	1003.44
ENSG00000011028	MRC2	1.05908	NA	NA	615.767	617.179	375.997	182.747	163.27	359.562	367.059	4252.68	847.756	1966.75
ENSG00000011052	NME1-NME2	-0.333943	0.416456	0.607306	21.1604	29.1417	52.3648	45.4595	16.2315	42.5098	45.3296	34.5451	44.481	48.1653
ENSG00000011105	TSPAN9	-1.05086	0.019945	0.0695345	654.914	734.787	364.837	178.201	134.626	531.373	443.346	579.993	612.268	975.348
ENSG00000011114	BTBD7	0.22099	0.228992	0.411731	627.405	517.265	685.894	996.472	719.915	821.857	757.336	660.901	690.764	658.259
ENSG00000011132	APBA3	0.194729	0.0770865	0.192298	397.815	375.72	375.997	431.865	387.646	336.536	313.99	428.177	357.156	386.326
ENSG00000011143	MKS1	-0.035048	0.842002	0.913562	462.354	562.018	485.019	594.61	603.43	668.644	490.886	434.54	651.516	583.001
ENSG00000011198	ABHD5	1.27606	1.48285e-16	1.16978e-14	81.4675	104.077	104.73	220.933	220.557	91.219	110.56	251.815	90.2703	85.2927
ENSG00000011201	ANOS1	-4.78164	1.89931e-12	8.84188e-11	371.365	1264.54	148.51	5.45514	15.2767	252.402	512.998	26.3633	230.255	242.833
ENSG00000011243	AKAP8L	0.495538	0.123362	0.268697	3728.46	3196.22	2155.54	6871.65	2755.54	2384.09	2373.72	2651.79	2939.67	3545.17
ENSG00000011258	MBTD1	-0.312871	0.0150247	0.055807	407.337	380.924	349.385	346.401	328.449	427.755	425.656	279.088	427.803	348.195
ENSG00000011260	UTP18	-0.10075	0.436719	0.626664	999.828	1085.53	887.627	923.736	994.896	1167.25	1072.43	869.99	918.402	844.9
ENSG00000011275	RNF216	-0.161031	0.09053	0.215213	1499.21	1604.87	1592.41	1575.63	1411.19	1821.72	1697.1	1392.71	1483.57	1722.91
ENSG00000011295	TTC19	0.0214598	0.861065	0.924307	1437.85	1656.91	1302.25	1508.35	1534.35	1480.76	1509.14	1319.08	1462.64	1179.05
ENSG00000011304	PTBP1	-0.156803	0.222752	0.404252	7171.25	7165.73	7125.91	7572.64	5604.64	6945.05	7470.54	5629.03	5820.47	7218.78
ENSG00000011332	DPF1	-0.0872178	0.792884	0.883983	89.9316	99.9144	82.4103	110.921	57.2877	67.3073	70.7584	45.454	53.6389	65.2239
ENSG00000011347	SYT7	-3.88153	6.99398e-37	2.86662e-34	1106.69	989.777	1332.3	75.4627	69.7	1989.99	1048.11	104.544	1395.92	726.493
ENSG00000011376	LARS2	-0.406806	0.0125208	0.0483743	557.576	700.441	476.434	478.234	361.867	469.38	514.104	398.177	532.464	581.998
ENSG00000011405	PIK3C2A	-0.219309	0.106443	0.241444	803.037	606.772	791.482	731.897	591.972	677.501	813.721	632.72	833.365	791.717
ENSG00000011422	PLAUR	-1.71938	0.000861165	0.00546681	82.5255	108.241	161.387	26.3665	13.3671	110.703	174.685	81.8172	94.1951	202.696
ENSG00000011426	ANLN	0.110493	0.811249	0.895558	59.2491	22.897	23.1779	58.1881	21.0055	57.5654	36.4848	40.9086	30.0901	30.1033
ENSG00000011451	WIZ	-0.0664112	0.738497	0.84983	1220.95	1159.42	1121.98	1400.15	863.134	1091.09	1305.71	973.625	790.192	1218.18
ENSG00000011454	RABGAP1	-0.157707	0.0984372	0.228479	1961.57	1828.64	1908.31	1818.38	1592.6	1969.62	1997.82	1609.07	1610.47	1786.13
ENSG00000011465	DCN	1.81784	0.193276	0.367268	617.883	1463.33	272.126	29.0941	104.073	140.814	276.4	9768.07	713.004	3069.54
ENSG00000011478	QPCTL	0.376423	0.0877806	0.210669	186.211	233.134	239.505	381.86	205.281	224.062	229.965	337.269	295.668	254.875
ENSG00000011485	PPP5C	0.282838	0.0448324	0.129306	2072.66	2301.15	2598.5	2983.05	3100.22	2362.84	2112.8	2187.25	2002.95	2407.26
ENSG00000011523	CEP68	0.0544942	0.63545	0.781576	562.866	481.879	492.745	522.784	513.679	503.033	496.414	605.447	548.163	606.08
ENSG00000011566	MAP4K3	-0.442917	0.0146883	0.0548275	1065.43	904.433	895.353	895.551	654.989	888.279	944.182	489.994	953.725	821.821
ENSG00000011590	ZBTB32	0.0693464	0.910968	0.952456	6.34812	24.9786	9.44284	12.7287	5.72877	7.08497	11.056	15.4544	6.54132	10.0344
ENSG00000011600	TYROBP	0.0319504	0.947402	0.972417	320.58	368.434	476.434	216.387	241.563	193.951	184.635	714.537	474.9	657.256
ENSG00000011638	TMEM159	0.438356	0.479832	0.660637	115.324	133.219	515.064	62.7341	492.674	170.925	274.189	519.085	401.637	239.823
ENSG00000011677	GABRA3	3.12606	0.00495172	0.0229893	11.6382	47.8756	10.3013	1.81838	315.082	57.5654	8.8448	259.088	1.30826	16.0551
ENSG00000012048	BRCA1	-0.372912	0.106726	0.241852	180.921	114.485	107.305	100.011	101.208	116.016	93.976	93.6353	143.909	135.465
ENSG00000012061	ERCC1	0.12824	0.263093	0.452069	1031.57	1152.14	1375.22	1347.42	1236.46	1070.72	1058.06	1213.62	1181.36	1236.24
ENSG00000012124	CD22	-1.93694	0.00501002	0.0231774	17.9863	58.2834	97.8622	27.2757	2.86438	81.4772	54.1744	16.3634	22.2405	83.2859
ENSG00000012171	SEMA3B	0.978197	0.0249174	0.082362	42.3208	57.2426	74.6843	206.386	63.0164	102.732	56.3856	189.998	113.819	97.3341
ENSG00000012174	MBTPS2	0.0479096	0.795306	0.885737	518.429	602.609	375.138	510.055	567.148	498.605	500.837	421.813	508.915	380.305
ENSG00000012211	PRICKLE3	-0.217809	0.465553	0.650814	167.167	74.9358	108.163	102.738	105.982	128.415	98.3984	102.726	91.5785	175.603
ENSG00000012223	LTF	-2.34077	0.00158756	0.00901833	120.614	304.947	48.0726	25.4573	25.7794	596.023	77.392	62.7265	90.2703	109.375
ENSG00000012232	EXTL3	-0.537213	3.36421e-06	4.56651e-05	2328.7	3114	2557.29	1743.83	1851.35	2460.26	2906.62	1786.34	2399.36	2455.43
ENSG00000012504	NR1H4	-1.37112	0.273268	0.463368	7.40613	49.9572	12.8766	3.63676	0	1.77124	1.1056	11.818	14.3909	6.02066
ENSG00000012660	ELOVL5	1.11947	2.62287e-09	7.05444e-08	1702.35	2019.1	1594.12	4303.19	4198.23	1814.64	1316.77	2688.15	1644.49	1924.61
ENSG00000012779	ALOX5	-1.24398	0.0180294	0.0642342	78.2934	81.1804	139.926	37.2768	48.6945	61.1079	158.101	93.6353	167.458	307.054
ENSG00000012817	KDM5D	-5.48186	1.0362e-05	0.000123026	2380.54	2138.79	1510	50.9146	37.237	23.0262	13.2672	9.99988	2052.67	2116.26
ENSG00000012822	CALCOCO1	-0.0858555	0.554917	0.720849	4204.57	3943.5	3192.54	3840.42	3384.75	3087.28	3806.58	2838.15	3175.16	3512.05
ENSG00000012963	UBR7	-0.0513986	0.739208	0.850137	871.808	831.579	1198.38	799.177	936.653	1088.43	919.859	1030.9	859.53	916.144
ENSG00000012983	MAP4K5	0.0560203	0.642579	0.786066	1042.15	933.575	978.622	1163.76	937.608	992.782	1064.69	904.535	864.763	868.983
ENSG00000013016	EHD3	2.53205	9.96682e-26	1.64837e-23	549.112	444.411	542.534	4885.07	2837.65	659.788	594.813	2803.6	614.884	840.886
ENSG00000013275	PSMC4	0.0352514	0.71668	0.835344	1894.91	1937.92	2187.31	2301.16	1862.8	2091.84	2109.48	2048.16	1842.04	2078.13
ENSG00000013288	MAN2B2	-0.0599388	0.77294	0.872061	3508.39	3698.91	3488.7	4121.36	2526.39	4186.33	2875.67	2937.24	3138.53	2416.29
ENSG00000013293	SLC7A14	-0.284546	0.493892	0.671748	1450.54	3685.38	1842.21	2473.9	2525.43	3818.8	2319.55	2057.25	5458.08	1482.09
ENSG00000013297	CLDN11	0.0276796	0.962942	0.979523	79.3514	172.769	40.3467	49.0962	64.926	160.298	153.678	261.815	175.307	79.2721
ENSG00000013306	SLC25A39	0.210643	0.121181	0.265089	2971.98	3135.85	2874.92	3837.69	3029.56	2710	2339.45	3174.51	2820.62	3394.65
ENSG00000013364	MVP	0.683675	0.0236133	0.0793179	2871.46	2775.75	1370.07	3916.79	2264.77	1838.55	1211.74	3386.32	1916.61	1915.57
ENSG00000013374	NUB1	-0.0165888	0.856849	0.922014	1603.96	1857.78	1852.51	1648.36	1783.56	1834.12	1970.18	1873.61	1759.62	1643.64
ENSG00000013375	PGM3	0.0194114	0.913188	0.953811	686.654	784.744	942.567	895.551	827.807	883.851	762.864	731.81	992.973	599.056
ENSG00000013392	RWDD2A	0.0899747	0.699364	0.82432	215.836	296.621	326.207	306.397	403.878	286.056	286.35	203.634	341.457	250.861
ENSG00000013441	CLK1	-0.352471	0.168367	0.33394	1989.08	2531.16	1534.89	1329.23	1464.65	996.324	1397.48	1218.17	1810.64	1693.81
ENSG00000013503	POLR3B	-0.47998	0.00038654	0.00280036	465.528	478.756	477.293	309.124	416.29	508.347	521.843	309.087	498.449	415.426
ENSG00000013523	ANGEL1	-0.569193	4.8361e-08	1.02565e-06	1053.79	1114.67	1032.7	786.449	703.683	1038.83	1138.77	633.629	1057.08	918.151
ENSG00000013561	RNF14	0.393327	0.00914973	0.0379641	1242.11	1209.38	1600.99	1846.56	1799.79	1551.61	1491.45	1632.71	1173.51	1105.8
ENSG00000013563	DNASE1L1	0.127523	0.529129	0.700871	796.688	895.066	682.46	606.429	852.631	657.131	584.862	982.716	686.839	912.131
ENSG00000013573	DDX11	0.0460908	0.93458	0.965285	624.231	684.83	110.739	492.781	616.797	371.961	315.096	200.907	675.065	180.62
ENSG00000013583	HEBP1	-0.274674	0.357804	0.55232	320.58	562.018	587.173	240.026	443.979	290.484	560.539	470.904	451.351	487.674
ENSG00000013588	GPRC5A	-0.219246	0.851248	0.91958	1.05802	11.4485	7.72596	0.909189	0.954794	12.3987	25.4288	41.8177	37.9397	23.0792
ENSG00000013619	MAMLD1	-1.06228	0.0361089	0.109682	279.317	485.001	114.173	73.6443	117.44	103.618	173.579	114.544	104.661	228.785
ENSG00000013725	CD6	0.133134	0.776066	0.87381	34.9146	49.9572	97.0037	66.3708	50.6041	34.5392	26.5344	65.4538	47.0975	97.3341
ENSG00000013810	TACC3	0.659472	0.0552286	0.150517	202.082	133.219	183.706	460.05	157.541	185.981	128.25	191.816	154.375	207.713
ENSG00000014123	UFL1	-0.0988074	0.404545	0.595929	902.49	1063.67	993.215	973.742	880.32	810.344	979.561	910.898	1113.33	1050.61
ENSG00000014138	POLA2	-0.0908309	0.641651	0.785549	227.474	258.112	153.661	217.296	175.682	189.523	179.107	166.362	198.856	184.634
ENSG00000014164	ZC3H3	0.0346866	0.817728	0.899683	509.965	463.145	433.512	520.965	392.42	443.697	425.656	449.086	344.074	481.653
ENSG00000014216	CAPN1	0.463531	0.0896781	0.213808	4097.71	2980.78	3186.53	6869.83	2886.34	3602.71	2677.76	3318.14	2729.04	2848.78
ENSG00000014641	MDH1	0.0041823	0.981357	0.989227	2835.49	4462.84	4061.28	2947.59	3815.36	4031.35	3547.87	4112.68	3308.6	3053.48
ENSG00000014824	SLC30A9	0.393144	0.00258406	0.0135071	2659.86	2683.12	2564.16	3551.29	3262.53	2901.3	3145.43	3650.87	2557.66	2082.15
ENSG00000014914	MTMR11	0.917131	0.0127886	0.0491271	139.659	264.357	221.478	400.952	268.297	318.824	98.3984	552.721	214.555	251.864
ENSG00000014919	COX15	0.251992	0.0219048	0.0747364	812.559	828.457	741.692	974.651	1033.09	913.076	853.523	863.626	748.327	726.493
ENSG00000015133	CCDC88C	-1.02619	0.159124	0.321485	83.5835	41.631	34.3376	55.4605	38.1918	115.131	48.6464	89.9989	400.329	150.517
ENSG00000015153	YAF2	0.910582	0.000223132	0.00175508	293.071	257.071	345.951	784.63	619.661	273.657	367.059	395.45	423.878	274.944
ENSG00000015171	ZMYND11	0.0550518	0.71842	0.836478	2818.56	2521.8	3218.29	3476.74	3048.66	3186.47	3491.48	2579.97	2438.61	2772.52
ENSG00000015285	WAS	-0.107749	0.786709	0.880901	139.659	77.0173	193.149	100.011	103.118	85.0197	90.6592	182.725	179.232	205.706
ENSG00000015413	DPEP1	-0.904168	0.118863	0.261325	42.3208	31.2232	48.9311	7.27351	11.4575	13.2843	21.0064	34.5451	43.1727	33.1137
ENSG00000015475	BID	-0.97205	0.0230261	0.0777321	133.31	123.852	151.085	50.0054	38.1918	92.9903	111.666	133.635	167.458	235.809
ENSG00000015479	MATR3	-0.22859	0.344744	0.53909	221.126	284.132	142.501	179.11	174.727	240.003	183.53	158.18	163.533	164.565
ENSG00000015532	XYLT2	-0.549209	0.00843999	0.035607	980.784	1321.78	763.153	695.53	640.667	908.648	776.131	596.357	1113.33	736.528
ENSG00000015592	STMN4	-2.97206	5.3255e-05	0.000510198	155.529	39.5494	180.272	12.7287	21.9603	294.912	134.883	12.7271	31.3984	30.1033
ENSG00000015676	NUDCD3	0.0215005	0.831669	0.907682	2346.69	2447.9	2192.46	2543	2515.88	2284.02	2425.69	1972.7	2290.77	2177.47
ENSG00000016082	ISL1	2.15481	0.156343	0.317273	279.317	1052.22	0	764.628	1797.88	526.945	6.6336	1442.71	45.7893	187.644
ENSG00000016391	CHDH	-1.27172	0.0128366	0.0492814	16.9283	24.9786	20.6026	11.8195	6.68356	24.7974	36.4848	13.6362	45.7893	13.0448
ENSG00000016402	IL20RA	-2.16362	0.0274439	0.0888288	15.8703	47.8756	8.5844	16.3654	4.77397	3.54249	29.8512	12.7271	117.744	131.451
ENSG00000016864	GLT8D1	-0.296654	0.00114596	0.00690507	2125.56	2573.84	2225.08	1726.55	1872.35	2291.1	2057.52	1935.43	2365.34	2223.63
ENSG00000017260	ATP2C1	1.01608	8.49897e-08	1.69925e-06	2530.78	2713.3	1979.56	5156.92	4198.23	2075.01	2503.08	3880.86	1853.81	1615.54
ENSG00000017797	RALBP1	0.0464983	0.772703	0.872002	1260.1	1130.28	1315.99	1471.98	1404.5	1643.71	1782.23	1645.44	1522.82	1562.36
ENSG00000018189	RUFY3	-0.124411	0.473415	0.656312	2759.31	3027.61	2136.66	2799.39	2581.76	3380.42	3714.82	2580.88	2579.9	2653.11
ENSG00000018236	CNTN1	-0.780687	0.0017009	0.00954711	6388.32	7041.88	5344.65	3818.6	3325.55	7431.25	7164.29	3330.87	5489.48	3129.74
ENSG00000018280	SLC11A1	-1.5097	0.00531861	0.0243865	79.3514	30.1825	66.9583	10.0011	20.0507	106.275	28.7456	34.5451	40.5562	76.2617
ENSG00000018408	WWTR1	-0.156652	0.812149	0.896292	265.563	161.32	200.875	84.5546	77.3383	130.186	207.853	566.357	286.51	642.204
ENSG00000018510	AGPS	-0.360403	0.0102815	0.0416072	722.627	641.117	660.999	578.244	490.764	851.083	654.515	511.812	613.576	589.022
ENSG00000018610	CXorf56	0.473352	0.0506599	0.140874	504.675	676.504	531.374	580.063	855.496	613.736	400.227	695.446	531.156	323.109
ENSG00000018625	ATP1A2	-3.0055	2.21101e-17	1.861e-15	3247.06	4350.44	2471.45	180.929	346.59	2190.14	2485.39	491.812	1516.28	2838.74
ENSG00000018699	TTC27	0.274068	0.128821	0.276942	232.764	185.258	157.953	239.117	247.292	255.059	218.909	258.179	170.074	215.74
ENSG00000018869	ZNF582	0.119629	0.451206	0.639487	149.181	146.749	166.537	141.834	189.049	143.471	129.355	148.18	132.135	158.544
ENSG00000019102	VSIG2	-2.80899	0.00047912	0.00333702	41.2627	13.5301	33.4792	2.72757	1.90959	94.7615	64.1248	21.8179	116.436	70.2411
ENSG00000019144	PHLDB1	-1.06626	0.00145841	0.00839084	2264.16	2425.01	2065.41	1316.51	814.439	1677.37	2214.52	1333.62	1627.48	4653.97
ENSG00000019169	MARCO	-1.3742	0.437119	0.627059	62.4231	351.782	0.85844	2.72757	0.954794	2.65687	0	67.2719	6.54132	5.01722
ENSG00000019485	PRDM11	-0.488069	0.0221552	0.0754649	512.081	502.694	462.699	447.321	337.997	555.285	417.917	224.543	450.043	403.385
ENSG00000019505	SYT13	0.73129	0.318628	0.511217	149.181	122.811	258.39	790.995	208.145	338.308	275.294	29.9996	234.179	68.2342
ENSG00000019549	SNAI2	-0.37974	0.735379	0.84765	38.0887	28.1009	21.461	5.45514	1.90959	3.54249	28.7456	109.999	103.353	133.458
ENSG00000019582	CD74	-0.582582	0.208706	0.386875	6332.24	10780.3	14426.1	7932.68	5331.57	5553.73	4969.67	9723.52	17135.7	21127.5
ENSG00000019991	HGF	1.10704	NA	NA	20.1024	27.0601	14.5935	4.54595	6.68356	8.85622	19.9008	141.817	22.2405	53.1825
ENSG00000019995	ZRANB1	0.248575	0.13206	0.282042	470.819	387.168	473.001	683.71	488.855	442.811	440.029	422.722	429.111	489.681
ENSG00000020129	NCDN	-0.435066	0.000611389	0.00408474	6368.22	6594.35	6432.29	4982.36	5179.76	5587.39	7676.18	4019.95	6038.95	6041.74
ENSG00000020181	ADGRA2	-0.00564166	0.994055	0.996469	902.49	667.137	544.251	845.546	157.541	129.301	561.645	1616.34	710.388	2621
ENSG00000020256	ZFP64	-0.0209252	0.85119	0.91957	322.696	283.091	309.897	319.125	273.071	304.654	311.779	287.269	281.277	267.92
ENSG00000020426	MNAT1	0.304582	0.022281	0.0758004	444.368	393.413	517.639	554.605	624.435	461.409	472.091	475.449	401.637	431.481
ENSG00000020577	SAMD4A	-0.902847	0.0278738	0.0899577	115.324	103.037	230.062	50.0054	70.6548	202.807	154.784	160.907	179.232	242.833
ENSG00000020633	RUNX3	-0.0467986	0.944734	0.970788	52.901	55.1611	115.889	62.7341	63.0164	21.2549	48.6464	155.453	137.368	246.847
ENSG00000020922	MRE11	-0.0545263	0.756715	0.861124	323.754	275.805	309.038	317.307	342.771	367.533	415.706	328.178	422.57	282.971
ENSG00000021300	PLEKHB1	0.322435	0.464014	0.649916	1198.74	1023.08	1779.55	2033.86	2308.69	3732.9	1121.08	1899.98	2040.89	751.58
ENSG00000021355	SERPINB1	-0.395446	0.00281523	0.014542	1250.58	1377.99	1788.13	1215.59	1112.34	1547.18	1766.75	1222.71	1586.93	1579.42
ENSG00000021488	SLC7A9	0.237983	0.757028	0.861313	14.8123	9.36697	11.1597	10.9103	12.4123	1.77124	21.0064	11.818	1.30826	10.0344
ENSG00000021574	SPAST	0.123597	0.426118	0.616566	476.109	468.349	442.097	621.885	511.77	559.713	598.13	475.449	489.291	413.419
ENSG00000021645	NRXN3	1.04601	0.118784	0.261264	253.925	135.301	345.951	1541.08	1596.42	211.664	1052.53	772.718	1140.81	1279.39
ENSG00000021762	OSBPL5	-0.148556	0.71938	0.837002	427.44	366.353	338.225	320.035	174.727	210.778	242.126	533.63	391.171	684.349
ENSG00000021776	AQR	-0.158089	0.168022	0.333428	793.514	782.663	736.542	762.81	728.508	839.569	829.2	621.811	852.989	669.297
ENSG00000021826	CPS1	2.65306	5.68282e-11	2.08046e-09	23.2764	28.1009	11.1597	110.012	80.2027	16.8268	11.056	170.907	27.4736	17.0585
ENSG00000022267	FHL1	-0.898654	4.48264e-07	7.53259e-06	3132.79	3443.92	3899.04	1736.55	1665.16	3794.89	3827.59	2448.15	2891.27	4456.29
ENSG00000022277	RTF2	0.187271	0.155649	0.316237	2306.48	2339.66	2560.73	2321.16	2878.7	2464.69	2689.92	2803.6	1921.84	2114.26
ENSG00000022556	NLRP2	3.3818	0.0320323	0.100122	9.52217	2.08155	401.75	516.42	826.852	3.54249	3.3168	613.629	14.3909	3.01033
ENSG00000022567	SLC45A4	0.654141	0.00112642	0.00681347	888.736	566.182	605.2	851.001	1055.05	657.131	727.485	1432.71	781.034	726.493
ENSG00000022840	RNF10	-0.239284	0.0847735	0.205837	3767.61	3560.49	5052.78	3354.91	3132.68	4467.08	3661.75	3671.78	3831.91	3636.48
ENSG00000022976	ZNF839	0.0725835	0.664038	0.800635	318.464	285.172	315.048	281.849	304.579	311.739	270.872	289.088	222.405	215.74
ENSG00000023041	ZDHHC6	0.252884	0.0430106	0.125295	403.105	444.411	380.289	434.592	564.283	394.987	395.805	497.267	434.344	477.639
ENSG00000023171	GRAMD1B	1.09546	0.000279842	0.00214565	957.507	1165.67	824.961	2854.85	1101.83	921.932	747.385	1514.53	758.794	598.053
ENSG00000023191	RNH1	0.0497928	0.685113	0.814201	3148.67	3697.87	3278.38	2920.32	3154.64	3121.82	3117.79	4111.77	3304.68	3294.31
ENSG00000023228	NDUFS1	0.0462757	0.731305	0.845133	2081.12	2170.02	1976.99	2661.2	1976.42	2381.44	2431.21	2069.07	2256.76	1859.38
ENSG00000023287	RB1CC1	0.0101857	0.956844	0.977086	485.631	464.186	683.318	710.986	561.419	520.746	671.099	533.63	702.538	658.259
ENSG00000023318	ERP44	-0.324469	0.0231626	0.0781092	870.75	1058.47	1117.69	794.631	760.016	1174.33	965.189	1003.62	1083.24	1204.13
ENSG00000023330	ALAS1	0.313564	0.000571256	0.00385347	650.682	748.317	636.104	911.917	794.389	723.553	667.782	877.262	723.47	703.414
ENSG00000023445	BIRC3	0.648257	0.00556948	0.0253763	137.542	84.3028	169.971	214.569	216.738	139.043	160.312	233.634	179.232	120.413
ENSG00000023516	AKAP11	-0.501064	8.34855e-06	0.00010142	2690.54	2582.16	2420.8	1722	1939.19	2939.38	2770.63	1814.52	2535.42	2142.35
ENSG00000023572	GLRX2	0.260801	0.351529	0.545941	74.0613	86.3843	98.7206	87.2822	93.5698	131.958	108.349	165.453	83.729	90.31
ENSG00000023608	SNAPC1	0.730773	0.0015617	0.00890363	140.717	145.708	149.369	162.745	341.816	147.899	186.846	253.633	147.834	147.506
ENSG00000023697	DERA	0.706185	0.00207101	0.0112462	311.058	305.988	369.988	353.675	581.47	363.105	411.283	729.991	278.66	340.168
ENSG00000023734	STRAP	0.211546	0.254784	0.442126	2815.39	2883.99	3120.43	2462.08	3353.24	3448.61	3179.71	4424.49	2481.78	2702.27
ENSG00000023892	DEF6	0.759155	0.0470494	0.133635	270.853	210.237	283.285	840.091	314.127	216.977	213.381	306.36	378.089	441.515
ENSG00000023902	PLEKHO1	-0.272869	0.404972	0.596232	431.672	409.025	471.284	278.212	306.489	292.255	298.512	528.176	494.524	740.542
ENSG00000023909	GCLM	-0.800391	0.000201775	0.00160993	602.013	385.087	689.327	360.039	395.285	511.889	689.894	273.633	661.982	641.201
ENSG00000024048	UBR2	-0.179996	0.120423	0.263792	1107.75	1088.65	1006.09	1098.3	880.32	1057.43	1101.18	799.991	1020.45	964.31
ENSG00000024422	EHD2	-0.312785	0.698975	0.824066	631.637	321.599	639.538	174.564	164.225	105.389	559.434	1309.98	397.713	2123.29
ENSG00000024526	DEPDC1	-0.19347	0.691239	0.818717	38.0887	10.4077	16.3104	19.093	19.0959	16.8268	16.584	10.909	15.6992	17.0585
ENSG00000024862	CCDC28A	0.896857	0.00548355	0.0250627	572.388	428.799	597.474	537.331	1576.37	718.239	776.131	1449.98	777.109	596.046
ENSG00000025039	RRAGD	-1.39816	0.000227204	0.00178018	3130.68	1997.25	2619.1	1944.76	732.327	3497.32	4325.11	594.539	2288.16	2262.77
ENSG00000025156	HSF2	-0.247952	0.139004	0.292075	527.952	624.465	454.973	455.504	398.149	532.259	500.837	399.086	460.509	370.271
ENSG00000025293	PHF20	-0.0859053	0.401369	0.592546	1211.43	1184.4	1199.24	1130.12	1091.33	1311.61	1216.16	1113.62	1166.97	968.323
ENSG00000025423	HSD17B6	-0.18114	0.685936	0.814664	20.1024	16.6524	15.4519	11.8195	13.3671	12.3987	15.4784	13.6362	17.0074	6.02066
ENSG00000025434	NR1H3	0.19871	0.461732	0.647634	252.867	224.807	193.149	180.929	176.637	201.036	162.523	374.541	234.179	220.758
ENSG00000025708	TYMP	0.343943	0.559666	0.724481	242.286	296.621	242.939	360.948	260.659	141.699	159.206	748.173	965.499	471.619
ENSG00000025770	NCAPH2	0.595188	1.18941e-05	0.000138683	1237.88	1294.72	948.576	1721.1	1640.34	944.073	970.717	1529.98	1130.34	1031.54
ENSG00000025772	TOMM34	-0.318308	0.0720171	0.182927	1016.76	1062.63	811.226	905.553	733.282	1042.38	1207.32	708.174	730.012	957.286
ENSG00000025796	SEC63	-0.0460307	0.760546	0.863932	2366.79	3029.7	2325.51	2693.93	2386.03	2874.73	2843.6	2440.88	2715.96	1962.74
ENSG00000025800	KPNA6	0.232472	0.102435	0.234723	2225.01	1862.99	2707.52	2803.94	3061.07	2729.49	2675.55	2977.24	2774.83	2585.88
ENSG00000026025	VIM	0.499011	NA	NA	3324.3	1641.3	2412.22	827.362	619.661	1435.59	2287.49	11451.7	2685.87	7509.78
ENSG00000026036	RTEL1-TNFRSF6B	0.935161	0.0497456	0.139114	734.265	751.439	282.427	1745.64	553.781	315.281	287.456	476.358	440.885	575.977
ENSG00000026103	FAS	-0.0459024	0.948289	0.97285	37.0307	38.5087	25.7532	14.547	17.1863	25.683	30.9568	107.271	77.1876	100.344
ENSG00000026297	RNASET2	-1.01169	0.000314643	0.00236346	977.61	1005.39	1376.08	587.336	576.696	1124.74	646.776	618.175	1777.93	1477.07
ENSG00000026508	CD44	0.34111	0.721894	0.838727	26.4505	29.1417	18.0272	40.0043	29.5986	89.4478	44.224	305.451	347.998	136.468
ENSG00000026652	AGPAT4	-0.17009	0.556313	0.721917	960.681	899.229	648.122	1011.93	435.386	724.439	741.857	578.175	852.989	491.688
ENSG00000026751	SLAMF7	1.47199	0.066166	0.172092	8.46415	11.4485	8.5844	20.9114	12.4123	1.77124	8.8448	61.8175	7.84959	33.1137
ENSG00000026950	BTN3A1	-0.611162	0.00588621	0.0264727	612.593	838.865	547.685	327.308	360.912	636.762	521.843	566.357	731.32	584.004
ENSG00000027001	MIPEP	-0.249716	0.038618	0.11531	342.798	354.904	311.614	285.485	315.082	353.363	426.762	299.996	355.848	355.219
ENSG00000027075	PRKCH	0.185764	0.509954	0.685729	248.635	202.951	194.007	240.935	251.111	111.588	217.803	232.725	192.315	320.099
ENSG00000027644	INSRR	3.13153	0.000334897	0.00249079	10.5802	0	7.72596	28.1849	52.5137	10.6275	12.1616	179.998	24.857	4.01378
ENSG00000027697	IFNGR1	-0.356609	0.0231544	0.0780954	655.972	866.965	937.417	633.705	634.938	764.292	802.665	737.264	1037.45	930.193
ENSG00000027847	B4GALT7	-0.244304	0.112852	0.252008	1249.52	1236.44	1150.31	872.822	1057.91	998.096	877.846	802.718	1088.48	953.272
ENSG00000027869	SH2D2A	2.53344	0.00181702	0.0100908	5.2901	11.4485	3.43376	8.1827	33.4178	1.77124	5.528	79.09	5.23306	16.0551
ENSG00000028116	VRK2	0.531036	0.00877469	0.0367477	334.334	319.518	291.87	572.789	359.003	328.566	307.357	359.996	282.585	221.761
ENSG00000028137	TNFRSF1B	-0.385245	0.438282	0.628155	448.6	324.722	315.906	169.109	168.999	142.585	197.902	485.449	400.329	680.335
ENSG00000028203	VEZT	-0.0194796	0.841704	0.913468	1427.27	1369.66	1461.07	1556.53	1498.07	1549.84	1367.63	1226.35	1431.24	1515.2
ENSG00000028277	POU2F2	1.62274	0.00266089	0.0138663	98.3958	100.955	106.447	476.415	710.367	139.043	135.989	453.631	136.06	525.805
ENSG00000028310	BRD9	1.19142	1.10904e-08	2.68418e-07	915.187	818.049	753.71	2774.85	1421.69	843.998	776.131	1582.71	866.071	932.2
ENSG00000028528	SNX1	-0.285455	0.0191859	0.0674407	3246	2926.66	2795.08	2441.17	2226.58	3015.54	2404.68	2185.43	2721.19	2379.17
ENSG00000028839	TBPL1	0.398576	0.0738874	0.186405	225.358	257.071	332.216	266.392	494.583	310.853	352.686	382.723	266.886	277.954
ENSG00000029153	ARNTL2	1.78357	1.81662e-10	6.08357e-09	84.6415	58.2834	115.889	437.32	228.196	96.5328	86.2368	260.906	79.8042	105.362
ENSG00000029363	BCLAF1	-0.0235816	0.852249	0.920008	3909.38	3608.37	3618.33	3840.42	3994.86	4524.64	4287.52	3436.32	3563.71	3220.05
ENSG00000029364	SLC39A9	0.249994	0.0387332	0.115527	1197.68	1371.74	1252.46	1518.35	1563	1100.83	1089.02	1368.17	1471.8	1250.29
ENSG00000029534	ANK1	1.91057	0.00195774	0.0107362	174.573	319.518	95.2869	1537.44	289.303	118.673	250.971	170.907	164.841	116.4
ENSG00000029559	IBSP	5.78834	NA	NA	4.23208	1.04077	28.3285	0.909189	13.3671	8.85622	22.112	3641.78	143.909	66.2273
ENSG00000029639	TFB1M	0.271851	0.282556	0.474162	167.167	154.035	145.076	263.665	185.23	248.86	191.269	164.544	147.834	130.448
ENSG00000029725	RABEP1	-0.273655	0.0206906	0.0716306	2002.83	1768.28	1679.97	1598.35	1591.64	2178.63	1967.97	1428.17	1601.32	1824.26
ENSG00000029993	HMGB3	-0.973326	0.000271192	0.00208611	126.962	148.831	115.031	52.733	81.1575	129.301	91.7648	76.3627	185.774	166.572
ENSG00000030066	NUP160	0.00688433	0.962481	0.979469	609.419	576.589	539.1	516.42	745.694	583.625	654.515	592.72	719.546	627.153
ENSG00000030110	BAK1	-0.0868255	0.674684	0.80665	272.969	191.503	230.062	190.93	206.236	164.726	190.163	237.27	245.954	277.954
ENSG00000030304	MUSK	-2.128	0.0155381	0.0572626	60.3071	190.462	220.619	4.54595	63.9712	9.74184	288.562	67.2719	272.119	343.178
ENSG00000030419	IKZF2	-0.851257	8.22265e-08	1.65453e-06	266.621	230.011	266.116	158.199	144.174	213.435	280.822	117.271	278.66	232.799
ENSG00000030582	GRN	0.95704	0.00437356	0.0208248	4608.73	4933.27	3826.93	3522.2	9382.76	3125.36	3284.74	12068	5260.53	4977.08
ENSG00000031003	FAM13B	-0.18442	0.339583	0.533574	1389.18	1273.91	1712.59	1575.63	1184.9	1676.48	1567.74	1036.35	1390.69	1055.62
ENSG00000031081	ARHGAP31	-0.247362	0.706039	0.82918	241.228	81.1804	225.77	67.28	41.0561	76.1635	158.101	361.814	194.931	325.116
ENSG00000031691	CENPQ	-0.0224041	0.924849	0.960352	89.9316	91.5882	121.04	129.105	109.801	118.673	135.989	78.1809	108.586	85.2927
ENSG00000031698	SARS	0.0443322	0.631319	0.778816	4746.27	5156	4179.75	4509.58	4943.92	4960.37	4291.94	4730.85	4398.39	4360.97
ENSG00000031823	RANBP3	0.0178999	0.874465	0.931636	2456.72	2338.62	2205.33	2420.26	2493.92	2445.2	2360.46	2087.25	1876.05	2448.4
ENSG00000032219	ARID4A	-0.131736	0.319242	0.511644	1055.9	885.699	1004.37	793.722	1022.58	977.726	1064.69	849.081	1026.99	798.741
ENSG00000032389	EIPR1	0.186859	0.183941	0.35482	1017.81	1065.75	1245.6	1476.52	1225	1256.7	1237.17	1137.26	922.327	1119.84
ENSG00000032444	PNPLA6	-0.0809252	0.765424	0.867423	5679.45	4634.57	3300.7	5329.67	3384.75	3091.71	2850.24	2854.51	4610.33	4386.05
ENSG00000032742	IFT88	0.10678	0.653344	0.793337	627.405	618.22	821.527	683.71	1055.05	828.056	1096.76	937.262	1080.63	727.497
ENSG00000033011	ALG1	0.110869	0.557175	0.722688	281.433	338.252	273.842	282.758	382.872	252.402	255.394	316.36	399.021	324.112
ENSG00000033030	ZCCHC8	0.0208331	0.832307	0.908172	480.341	505.817	485.877	516.42	552.826	520.746	491.992	505.449	586.103	553.901
ENSG00000033050	ABCF2	0.108275	0.236726	0.4209	961.739	1000.18	846.422	1073.75	997.76	1015.81	857.945	966.352	945.875	948.255
ENSG00000033100	CHPF2	0.266834	0.127129	0.274824	2284.26	1824.48	1744.35	2867.58	2077.63	2127.26	1859.62	2730.88	2378.43	2670.16
ENSG00000033122	LRRC7	1.65384	0.082242	0.201229	94.1637	12.4893	11.1597	27.2757	349.455	136.386	123.827	180.907	9.15785	26.0895
ENSG00000033170	FUT8	-0.264699	0.142693	0.296817	426.382	369.475	511.63	300.942	397.194	443.697	448.874	328.178	355.848	318.092
ENSG00000033178	UBA6	-0.072129	0.491383	0.669839	1371.19	1375.9	1179.5	1232.86	1247.92	1192.93	1243.8	1103.62	1339.66	1092.75
ENSG00000033327	GAB2	-0.937501	6.25756e-07	1.02236e-05	1400.82	1319.7	1298.82	617.34	545.187	1194.7	916.542	619.993	863.455	969.327
ENSG00000033627	ATP6V0A1	0.0785808	0.589155	0.747707	5656.17	5683.67	4341.99	5175.11	5118.65	4509.59	4398.08	4533.58	4117.11	4055.92
ENSG00000033800	PIAS1	-0.00416656	0.978651	0.988161	1031.57	936.697	912.522	1061.93	1013.99	1114.11	1168.62	832.718	830.748	810.783
ENSG00000033867	SLC4A7	-1.19265	0.0066225	0.0291594	104.744	115.526	146.793	42.7319	107.892	115.131	133.778	70.9083	298.284	267.92
ENSG00000034053	APBA2	-0.710544	0.217606	0.3979	143.891	129.056	32.6207	36.3676	32.463	180.667	58.5968	117.271	78.4959	87.2996
ENSG00000034152	MAP2K3	0.695442	0.00711673	0.0309453	534.3	436.085	845.564	1118.3	894.642	491.52	788.293	1218.17	669.832	890.055
ENSG00000034239	EFCAB1	0.43086	0.845923	0.916032	0	0	2.57532	0	0.954794	0	1.1056	1.81816	198.856	1.00344
ENSG00000034510	TMSB10	0.821065	0.0602049	0.160643	1792.28	1861.95	2356.42	2205.69	2710.66	921.932	1606.44	6460.83	2611.3	3876.3
ENSG00000034533	ASTE1	0.379807	0.0467675	0.133075	138.601	146.749	127.049	131.832	196.688	123.987	132.672	170.907	94.1951	130.448
ENSG00000034677	RNF19A	0.587652	0.000481806	0.00335449	473.993	447.533	529.658	808.269	870.772	472.922	616.925	809.991	703.846	623.139
ENSG00000034693	PEX3	0.347733	0.0465334	0.132549	287.781	356.986	269.55	360.039	449.708	374.618	352.686	432.722	379.397	258.889
ENSG00000034713	GABARAPL2	-0.196294	0.275625	0.466317	4457.43	5266.32	7109.6	4270.46	5555.95	7018.55	6317.4	5378.12	5460.7	5015.21
ENSG00000035115	SH3YL1	-0.789021	0.0048733	0.0226923	1343.68	1291.6	2109.19	982.834	1150.53	1227.47	2197.93	1116.35	2118.08	2814.66
ENSG00000035141	FAM136A	-0.0888689	0.527951	0.699851	705.699	717.094	643.83	523.693	724.689	671.301	646.776	577.266	603.11	540.856
ENSG00000035403	VCL	-1.19552	1.07924e-07	2.11298e-06	3403.65	2522.84	2192.46	1061.93	1007.31	1952.8	3188.55	1496.35	2446.46	3349.5
ENSG00000035664	DAPK2	0.451048	0.587504	0.746441	21.1604	29.1417	15.4519	10.0011	9.54794	17.7124	27.64	121.817	70.6463	60.2066
ENSG00000035681	NSMAF	-0.759216	5.47193e-14	3.11685e-12	940.579	879.455	975.188	630.068	516.544	895.364	899.958	525.448	986.432	1028.53
ENSG00000035687	ADSS	-0.104975	0.555872	0.721493	673.958	715.012	776.888	756.446	766.7	1029.98	993.934	897.262	845.139	1038.56
ENSG00000035720	STAP1	-3.42347	0.032258	0.100727	5.2901	1.04077	1.71688	3.63676	0	2.65687	2.2112	6.36356	65.4132	172.592
ENSG00000035862	TIMP2	0.0960978	0.724007	0.840647	11655.1	18443.6	9752.74	12514.1	8475.71	12172.9	8309.69	16378	10483.1	10755.9
ENSG00000035928	RFC1	-0.167513	0.252425	0.439872	1366.96	1330.11	1150.31	1213.77	1144.8	1488.73	1457.18	1049.08	1058.39	1076.7
ENSG00000036054	TBC1D23	-0.091169	0.387253	0.580157	612.593	727.502	621.511	630.068	616.797	619.05	624.664	543.63	675.065	571.963
ENSG00000036257	CUL3	0.114172	0.376603	0.569999	1384.95	1498.72	1510	1578.35	1704.31	1619.8	1810.97	1571.8	1420.78	1219.18
ENSG00000036448	MYOM2	-2.18513	5.03317e-06	6.45108e-05	70.8873	77.0173	57.5155	6.36433	23.8699	36.3105	46.4352	15.4544	83.729	112.386
ENSG00000036530	CYP46A1	-0.0941012	0.715617	0.834832	698.293	756.643	669.583	782.812	558.555	585.396	476.514	362.723	607.035	450.546
ENSG00000036549	AC118549.1	-0.0361243	0.820461	0.901298	757.542	693.156	579.447	785.54	739.965	854.625	873.424	618.175	713.004	658.259
ENSG00000036565	SLC18A1	-1.01421	0.388582	0.581639	19.0443	3.12232	18.0272	29.0941	1.90959	39.853	4.4224	0	14.3909	47.1619
ENSG00000036672	USP2	1.73079	1.28709e-07	2.46363e-06	537.474	535.999	985.489	3609.48	2574.13	818.315	891.113	1199.99	770.568	651.235
ENSG00000037042	TUBG2	0.536552	0.000499411	0.00345791	1100.34	907.556	881.618	1317.42	1292.79	857.282	991.723	1411.8	678.989	1050.61
ENSG00000037241	RPL26L1	0.41682	0.0135363	0.0514026	208.43	286.213	310.755	314.58	417.245	246.203	277.506	310.905	244.646	246.847
ENSG00000037280	FLT4	-1.75851	0.0220244	0.0751038	1068.6	471.471	393.166	147.289	67.7904	82.3628	486.464	363.632	236.796	1830.28
ENSG00000037474	NSUN2	0.125209	0.329797	0.52318	1394.47	1473.74	1443.9	1933.85	1456.06	1522.38	1538.99	1360.89	1283.41	1505.17
ENSG00000037637	FBXO42	0.415152	0.00982584	0.0402106	833.719	725.42	671.3	1194.67	908.009	852.854	710.901	809.081	665.907	634.177
ENSG00000037749	MFAP3	-0.616496	0.0106342	0.0426788	116.382	179.013	127.908	89.1006	66.8356	99.1896	117.194	80.9081	108.586	99.341
ENSG00000037757	MRI1	-0.15302	0.46044	0.646639	503.617	487.083	461.841	298.214	532.775	460.523	461.035	539.994	570.403	613.104
ENSG00000037897	METTL1	0.148003	0.568234	0.731296	75.1194	121.771	119.323	117.285	90.7054	135.5	117.194	170.907	126.902	102.351
ENSG00000038002	AGA	0.302699	0.244754	0.430868	151.297	231.052	140.784	160.927	216.738	122.216	165.84	269.997	208.014	207.713
ENSG00000038210	PI4K2B	0.752866	0.0160921	0.0589242	48.6689	35.3863	57.5155	103.648	60.152	43.3955	74.0752	113.635	57.5637	68.2342
ENSG00000038219	BOD1L1	0.0179973	0.885439	0.938502	817.849	724.379	733.966	902.825	804.891	712.04	908.803	743.628	868.688	887.045
ENSG00000038274	MAT2B	-0.354313	0.11875	0.26125	666.552	718.135	770.021	382.769	634.938	594.252	839.15	771.809	905.319	845.903
ENSG00000038295	TLL1	1.90688	NA	NA	7.40613	15.6116	4.2922	9.09189	9.54794	3.54249	13.2672	73.6355	6.54132	7.02411
ENSG00000038358	EDC4	0.156271	0.490422	0.668964	1799.69	1750.58	1099.66	2091.14	1265.1	1455.08	1242.69	1392.71	1122.49	1473.06
ENSG00000038382	TRIO	0.499997	0.0312958	0.0985451	1598.67	1319.7	1260.19	2863.95	1567.77	1428.51	1239.38	1356.35	1178.75	1524.23
ENSG00000038427	VCAN	2.8031	NA	NA	76.1774	58.2834	61.8077	14.547	19.0959	23.0262	80.7088	1175.44	47.0975	422.45
ENSG00000038532	CLEC16A	0.533298	0.0253361	0.0833368	746.962	619.261	721.948	1570.17	890.823	841.341	692.105	695.446	675.065	791.717
ENSG00000038945	MSR1	-0.835429	0.10592	0.24043	67.7132	94.7105	167.396	49.0962	23.8699	101.847	81.8144	130.908	193.623	142.489
ENSG00000039068	CDH1	0.820609	0.0111108	0.0441389	1963.68	1477.9	1938.36	3800.41	2110.1	2476.2	3189.66	4834.49	1874.74	1275.38
ENSG00000039123	MTREX	-0.240359	0.0468679	0.13326	1507.68	1616.32	1389.81	1363.78	1201.13	1718.99	1596.49	1241.8	1424.7	1238.25
ENSG00000039139	DNAH5	-1.67583	0.0156223	0.057539	80.4095	94.7105	64.383	46.3687	50.6041	123.987	144.834	63.6356	613.576	77.2652
ENSG00000039319	ZFYVE16	0.48411	0.0012643	0.00745609	836.893	821.171	842.13	1499.25	974.845	809.458	894.43	1014.53	863.455	753.586
ENSG00000039523	RIPOR1	-0.686505	0.000430972	0.00305472	386.177	366.353	245.514	225.479	172.818	302.883	259.816	170.907	277.352	300.03
ENSG00000039560	RAI14	-0.635726	0.400184	0.59152	249.693	195.666	166.537	45.4595	12.4123	185.981	346.053	435.449	300.901	344.181
ENSG00000039650	PNKP	0.17881	0.292901	0.485022	1874.81	1697.5	1419	2382.99	1783.56	1714.56	1484.82	1613.62	1622.25	2102.22
ENSG00000040199	PHLPP2	0.40941	0.0227662	0.0771031	322.696	282.05	328.783	509.146	380.008	295.798	326.152	301.815	257.728	277.954
ENSG00000040275	SPDL1	-0.222868	0.372104	0.565733	143.891	121.771	133.917	124.559	137.49	94.7615	204.536	97.2716	141.293	139.479
ENSG00000040341	STAU2	0.573318	0.00500489	0.0231621	681.364	763.929	749.418	1350.15	1033.09	826.285	869.001	827.263	609.651	533.832
ENSG00000040487	PQLC2	0.0823575	0.598704	0.754615	434.846	621.343	401.75	461.868	494.583	444.582	474.302	532.721	418.645	486.67
ENSG00000040531	CTNS	-0.337998	0.131292	0.280941	393.583	329.926	248.948	252.755	209.1	247.088	322.835	323.633	385.938	391.343
ENSG00000040608	RTN4R	-2.08613	0.000256899	0.00198425	23.2764	19.7747	30.0454	2.72757	6.68356	12.3987	19.9008	9.0908	34.0149	44.1515
ENSG00000040633	PHF23	0.580632	0.00179432	0.00997941	724.743	690.034	804.358	805.542	1513.35	743.922	831.411	1096.35	713.004	819.814
ENSG00000040731	CDH10	-0.347833	0.429476	0.619868	454.948	755.603	205.167	363.676	255.885	230.262	788.293	494.54	493.216	382.312
ENSG00000040933	INPP4A	-0.912331	0.0055018	0.0250982	1432.56	1339.48	1300.54	347.31	1202.09	1375.37	1155.35	475.449	1129.03	1157.97
ENSG00000041353	RAB27B	-2.92446	0.00117998	0.00704263	190.443	170.687	195.724	1.81838	2.86438	494.177	199.008	91.8171	351.923	108.372
ENSG00000041357	PSMA4	0.253144	0.0845373	0.205448	2342.45	1680.85	1678.25	2580.28	2418.49	1965.19	2332.82	2195.43	1879.98	2206.57
ENSG00000041515	MYO16	-0.880246	0.456998	0.644109	3.17406	107.2	8.5844	15.4562	21.9603	54.9085	5.528	6.36356	1.30826	7.02411
ENSG00000041802	LSG1	-0.322671	0.0415384	0.122064	696.177	963.757	740.834	708.258	668.356	780.233	1001.67	573.63	702.538	805.766
ENSG00000041880	PARP3	-0.431137	0.0135041	0.0513104	423.208	445.452	330.499	331.854	237.744	424.213	320.624	289.088	425.186	334.147
ENSG00000041982	TNC	1.73786	0.14842	0.304959	236.996	404.861	207.743	44.5503	55.3781	223.177	386.96	4855.4	1108.1	899.086
ENSG00000041988	THAP3	0.290172	0.0140672	0.0529175	399.931	365.312	390.59	426.41	480.261	319.709	340.525	411.813	323.141	374.285
ENSG00000042062	RIPOR3	-1.19399	0.103018	0.235687	188.327	327.844	106.447	43.6411	60.152	31.8824	99.504	187.271	256.42	543.867
ENSG00000042088	TDP1	0.132575	0.543961	0.712337	126.962	147.79	142.501	167.291	187.14	167.383	112.771	144.544	214.555	151.52
ENSG00000042286	AIFM2	-1.12304	7.04139e-07	1.1376e-05	424.266	486.042	281.568	185.475	191.914	435.726	354.898	155.453	273.427	450.546
ENSG00000042317	SPATA7	-0.288874	0.0180552	0.0643138	315.29	309.11	311.614	277.303	257.794	317.938	365.954	288.178	395.096	337.157
ENSG00000042429	MED17	0.0588332	0.730261	0.844217	505.733	562.018	526.224	710.077	553.781	603.108	601.446	454.54	440.885	608.087
ENSG00000042445	RETSAT	0.670572	4.21881e-05	0.00041886	532.184	639.036	519.356	1096.48	833.535	538.458	539.533	665.447	501.065	534.836
ENSG00000042493	CAPG	0.414306	0.347905	0.542412	199.966	177.972	406.901	484.598	532.775	230.262	238.81	411.813	646.283	603.07
ENSG00000042753	AP2S1	0.203751	0.142297	0.296352	1164.88	1260.38	1317.71	1234.68	1521.94	985.697	1072.43	1313.62	1066.24	1376.73
ENSG00000042781	USH2A	3.91337	1.57661e-05	0.000177254	6.34812	6.24465	0.85844	68.1892	55.3781	2.65687	2.2112	8.18172	0	2.00689
ENSG00000042832	TG	-2.81958	0.000566311	0.00382285	24.3344	59.3242	36.0545	1.81838	2.86438	11.5131	7.7392	5.45448	11.7744	16.0551
ENSG00000042980	ADAM28	-0.0173831	0.981886	0.989602	93.1057	105.118	124.474	68.1892	72.5644	176.239	67.4416	444.54	638.433	178.613
ENSG00000043039	BARX2	-1.53517	0.375575	0.569043	12.6962	6.24465	0.85844	0	7.63835	59.3367	0	5.45448	9.15785	0
ENSG00000043093	DCUN1D1	0.654493	0.0010324	0.00633006	265.563	257.071	322.773	570.971	540.414	335.651	371.482	365.45	367.622	269.926
ENSG00000043143	JADE2	-0.169275	0.362511	0.556624	2983.61	2707.06	2679.19	1892.02	2886.34	2829.56	3053.67	2247.25	2212.28	1966.75
ENSG00000043462	LCP2	-0.764641	0.169305	0.335479	122.73	145.708	208.601	105.466	66.8356	71.7354	111.666	159.998	162.225	494.698
ENSG00000043514	TRIT1	-0.317362	0.141596	0.295413	428.498	434.003	344.235	440.048	271.162	416.242	564.962	401.813	477.517	572.967
ENSG00000044090	CUL7	0.255733	0.178892	0.348074	2402.76	2270.97	1807.02	3381.28	1970.7	2043.13	1784.44	2111.79	2073.6	2205.57
ENSG00000044115	CTNNA1	0.226599	0.12754	0.275351	4337.88	4557.55	3755.68	4166.81	4524.77	4856.75	4010.01	6284.47	4301.57	4045.89
ENSG00000044446	PHKA2	-0.466122	0.131048	0.280516	3266.11	3064.04	1649.06	2486.63	1374.9	1989.99	1877.31	1090.9	2288.16	1829.28
ENSG00000044459	CNTLN	0.958366	0.000195566	0.00156902	126.962	100.955	143.36	396.407	211.964	176.239	144.834	219.997	146.526	155.534
ENSG00000044524	EPHA3	0.602233	0.297648	0.489947	203.14	226.889	157.953	320.944	227.241	229.376	317.307	504.54	31.3984	451.55
ENSG00000044574	HSPA5	0.130608	0.532961	0.70323	11340.9	11949.1	10719.3	15203.5	10400.6	15964.2	10049.9	15815.3	16405.6	11852.7
ENSG00000046604	DSG2	-1.90495	0.0134653	0.0512567	236.996	201.91	142.501	6.36433	104.073	115.131	118.299	29.0906	374.164	30.1033
ENSG00000046647	GEMIN8	-0.176696	0.220912	0.401957	347.03	413.188	401.75	419.136	354.229	459.638	438.923	299.996	395.096	374.285
ENSG00000046651	OFD1	-0.0146802	0.937761	0.967366	793.514	943.983	600.908	977.379	654.989	805.03	867.896	760.9	938.026	695.387
ENSG00000046653	GPM6B	1.29414	0.0570106	0.154237	117.44	206.073	51.5064	88.1914	94.5246	208.121	154.784	814.536	130.826	80.2755
ENSG00000046774	MAGEC2	5.4782	NA	NA	2.11604	0	0	101.829	0.954794	0	1.1056	3.63632	2.61653	0
ENSG00000046889	PREX2	-1.78424	0.0120992	0.0471512	103.686	79.0989	57.5155	16.3654	12.4123	23.9118	92.8704	59.0902	70.6463	278.957
ENSG00000047056	WDR37	-0.0479422	0.714542	0.834479	1548.94	1594.47	1463.64	1523.8	1503.8	1432.05	1487.03	1180.9	1159.12	1463.02
ENSG00000047188	YTHDC2	0.0134326	0.916312	0.955645	720.511	840.946	693.62	873.731	696.045	665.988	759.547	640.902	707.771	723.483
ENSG00000047230	CTPS2	-0.126943	0.414148	0.604782	292.013	283.091	241.222	256.391	242.518	328.566	217.803	232.725	249.879	249.858
ENSG00000047249	ATP6V1H	-0.150075	0.225707	0.407959	1633.58	2076.35	1830.19	1454.7	1792.15	1980.25	1949.17	1767.25	1580.38	1928.62
ENSG00000047315	POLR2B	-0.107428	0.295315	0.48764	1988.02	1982.68	2062.83	2235.7	1850.39	2392.06	2228.89	1840.89	2192.65	2052.04
ENSG00000047346	FAM214A	-0.0496607	0.782042	0.877611	1038.97	1081.37	1219.84	1175.58	1273.7	995.439	1479.29	839.081	1006.06	1119.84
ENSG00000047365	ARAP2	1.64467	0.0142985	0.0536594	108.976	78.0581	43.7804	425.501	156.586	66.4216	40.9072	292.724	289.127	27.093
ENSG00000047410	TPR	-0.193605	0.0550869	0.150218	2117.1	2223.1	1910.03	1995.67	1786.42	1898.77	2326.18	1696.34	1971.56	2174.46
ENSG00000047457	CP	1.0118	0.316465	0.509133	17.9863	22.897	2.57532	6.36433	4.77397	41.6242	8.8448	89.0899	316.6	5.01722
ENSG00000047578	KIAA0556	-0.636737	4.54824e-05	0.000445006	1327.81	1038.69	1066.18	801.905	753.333	960.014	1003.88	594.539	1322.66	1082.72
ENSG00000047579	DTNBP1	0.181951	0.521473	0.695187	257.099	442.329	402.608	581.881	393.375	293.141	591.496	498.176	512.84	532.829
ENSG00000047597	XK	0.890092	0.010971	0.0437032	305.768	323.681	230.062	716.441	412.471	259.487	267.555	246.361	205.398	139.479
ENSG00000047617	ANO2	-0.104607	0.91489	0.954902	39.1467	14.5708	12.8766	5.45514	5.72877	1.77124	5.528	48.1813	35.3232	40.1378
ENSG00000047621	C12orf4	0.384391	0.0183617	0.0651771	238.054	207.114	258.39	300.032	331.314	263.915	267.555	276.36	191.007	193.665
ENSG00000047634	SCML1	-0.441947	0.00439237	0.0208756	323.754	348.66	249.806	209.114	242.518	254.173	290.773	191.816	296.976	276.951
ENSG00000047644	WWC3	-0.378443	0.147164	0.303007	529.01	347.619	385.44	291.85	260.659	377.275	290.773	400.904	358.465	603.07
ENSG00000047648	ARHGAP6	-1.77897	0.0232337	0.0783208	119.556	29.1417	79.8349	23.6389	32.463	231.147	206.747	93.6353	45.7893	486.67
ENSG00000047662	FAM184B	1.01497	0.0109404	0.0435998	22.2184	14.5708	17.1688	23.6389	29.5986	14.1699	21.0064	56.363	14.3909	23.0792
ENSG00000047849	MAP4	0.314818	0.0452005	0.130128	5627.6	5051.92	5360.1	8319.99	5533.03	4645.97	5410.81	5451.75	4552.76	5564.1
ENSG00000047932	GOPC	-0.242911	0.095258	0.223327	1023.1	1145.89	975.188	1038.29	1024.49	1326.66	1400.79	861.808	1126.42	1077.7
ENSG00000048028	USP28	-0.368191	0.0657073	0.171206	477.167	579.712	568.287	445.503	435.386	592.481	499.731	290.906	414.72	394.354
ENSG00000048052	HDAC9	0.520987	0.0346907	0.106368	513.139	369.475	698.77	938.283	839.264	733.295	873.424	884.535	604.418	535.839
ENSG00000048140	TSPAN17	-0.164018	0.326722	0.519525	1237.88	1201.05	979.48	1059.21	797.253	948.501	809.299	983.625	1185.29	1065.66
ENSG00000048162	NOP16	0.127358	0.486038	0.665725	188.327	169.646	148.51	211.841	191.914	209.007	141.517	182.725	225.022	172.592
ENSG00000048342	CC2D2A	-0.459353	0.0201122	0.0700339	594.607	600.527	671.3	494.599	596.746	720.01	1000.57	501.812	877.846	648.225
ENSG00000048392	RRM2B	0.118467	0.554806	0.720842	1073.89	948.146	1496.26	1237.41	1421.69	1254.04	1671.67	1429.07	1348.82	994.413
ENSG00000048405	ZNF800	0.209067	0.214732	0.39425	210.546	195.666	277.276	300.032	245.382	295.798	236.598	289.088	221.097	244.84
ENSG00000048471	SNX29	-1.14752	2.55388e-07	4.55112e-06	1514.03	1175.03	1188.94	628.25	414.381	1153.97	895.536	454.54	1004.75	806.769
ENSG00000048540	LMO3	-2.45752	0.00225459	0.012059	1521.43	2641.49	2501.49	45.4595	31.5082	523.402	1743.53	843.627	1361.9	1506.17
ENSG00000048544	MRPS10	0.0949742	0.607836	0.760983	519.487	452.737	685.035	579.154	795.344	640.305	650.093	529.085	562.554	646.218
ENSG00000048649	RSF1	-0.13408	0.364462	0.558891	2872.52	2480.17	2708.38	2825.76	2308.69	3350.31	3115.58	2424.52	2609.99	2217.61
ENSG00000048707	VPS13D	-0.504362	0.000661062	0.00435945	1660.03	1632.98	1335.73	1160.13	1055.05	1489.62	1494.77	889.081	1528.05	1134.9
ENSG00000048740	CELF2	1.69681	0.000108876	0.000939899	180.921	64.528	190.574	260.028	315.082	139.043	106.138	828.172	125.593	202.696
ENSG00000048828	FAM120A	-0.180193	0.234249	0.417836	3232.25	3060.92	3236.32	3302.18	2222.76	3402.56	3348.86	2636.33	2740.81	2553.77
ENSG00000048991	R3HDM1	0.804141	6.9369e-06	8.58754e-05	844.299	769.133	1062.75	1996.58	1696.67	1099.06	991.723	1233.62	876.537	938.22
ENSG00000049089	COL9A2	-0.808278	0.0516349	0.143018	307.884	238.337	421.494	380.95	80.2027	402.958	437.818	154.544	419.953	287.988
ENSG00000049130	KITLG	-0.446852	0.577971	0.738968	81.4675	56.2018	65.2415	71.826	24.8246	22.1405	107.243	189.998	193.623	386.326
ENSG00000049167	ERCC8	0.0849573	0.756937	0.861313	139.659	154.035	179.414	175.474	153.722	188.637	148.15	139.998	71.9546	147.506
ENSG00000049192	ADAMTS6	0.265156	0.725203	0.841306	27.5085	8.3262	4.2922	39.0951	17.1863	53.1373	15.4784	33.636	14.3909	51.1756
ENSG00000049239	H6PD	0.509027	0.017375	0.062469	912.013	737.909	793.199	1610.17	1430.28	954.7	925.387	1045.44	1351.44	1027.53
ENSG00000049245	VAMP3	0.0946119	0.575492	0.736815	1793.34	1659	1705.72	1551.99	2180.75	2168	2290.8	2194.52	1666.73	1667.72
ENSG00000049246	PER3	0.873403	0.0155377	0.0572626	1684.37	1643.38	1038.71	3647.67	2066.17	1081.34	1813.18	1339.98	972.041	751.58
ENSG00000049283	EPN3	-5.73694	5.41758e-32	1.52452e-29	844.299	1725.6	471.284	20.0022	12.4123	450.781	1212.84	17.2725	469.667	1014.48
ENSG00000049323	LTBP1	-0.316401	NA	NA	306.826	130.097	280.71	57.2789	70.6548	317.938	181.318	1093.62	423.878	1908.55
ENSG00000049449	RCN1	-0.481276	0.0368945	0.111511	2991.02	3103.59	2011.33	1762.01	1965.92	2199	1958.02	1478.16	3007.7	1688.8
ENSG00000049540	ELN	0.420394	0.589819	0.748348	475.051	103.037	251.523	234.571	60.152	68.1929	242.126	970.898	393.788	673.311
ENSG00000049541	RFC2	0.246433	0.213623	0.393056	399.931	409.025	385.44	479.143	438.251	444.582	315.096	372.723	245.954	334.147
ENSG00000049618	ARID1B	0.045238	0.778522	0.875373	1850.48	1564.28	1785.56	2387.53	1769.23	2242.39	2129.39	1660.89	1860.35	1722.91
ENSG00000049656	CLPTM1L	-0.226781	0.128353	0.276536	2241.94	2451.02	1735.77	1814.74	1541.04	1960.77	1780.02	1675.43	1931	1638.62
ENSG00000049759	NEDD4L	0.485875	0.137006	0.289294	1067.54	635.913	1378.65	2000.22	2240.9	1388.65	1285.81	972.716	1760.92	1170.02
ENSG00000049768	FOXP3	0.471257	0.302591	0.495101	6.34812	10.4077	12.8766	10.9103	15.2767	14.1699	11.056	16.3634	9.15785	7.02411
ENSG00000049769	PPP1R3F	0.0549533	0.744317	0.853126	1588.09	1610.08	1781.26	1652.91	1855.17	1491.39	1791.07	1307.26	1185.29	1365.69
ENSG00000049860	HEXB	-0.664663	0.00570985	0.0258585	1041.09	1263.5	1036.14	543.695	792.479	1223.93	1374.26	1113.62	1700.74	1423.89
ENSG00000049883	PTCD2	0.512936	0.00280586	0.0145016	193.618	243.541	227.487	312.761	313.172	233.804	244.338	279.997	168.766	167.575
ENSG00000050030	NEXMIF	-0.056712	0.831479	0.907682	504.675	420.473	299.596	465.505	317.946	506.576	416.811	359.996	397.713	229.789
ENSG00000050130	JKAMP	-0.0833978	0.407424	0.598719	1486.52	1746.42	1560.64	1422.88	1645.11	1478.1	1558.9	1322.71	1588.23	1435.93
ENSG00000050165	DKK3	0.257601	0.668156	0.803509	1111.98	1138.61	673.017	2599.37	378.098	598.68	846.889	1154.53	693.38	3002.3
ENSG00000050327	ARHGEF5	-1.3272	0.000614211	0.00410068	386.177	469.389	290.153	60.9157	120.304	180.667	184.635	172.725	286.51	274.944
ENSG00000050344	NFE2L3	-0.130475	0.694324	0.82058	121.672	172.769	72.109	129.105	72.5644	85.9053	85.1312	102.726	98.1199	142.489
ENSG00000050393	MCUR1	-0.0202072	0.891038	0.94185	771.296	738.95	870.458	649.161	921.376	740.38	863.473	711.81	644.975	767.635
ENSG00000050405	LIMA1	1.3218	5.54826e-10	1.70369e-08	1279.15	1217.71	1589.83	4871.44	3337.01	1717.22	1463.81	3601.78	2241.06	1517.21
ENSG00000050426	LETMD1	0.475616	2.53794e-06	3.57894e-05	1463.24	1233.32	1160.61	1782.01	1593.55	1175.22	1249.33	1758.16	1187.9	1146.94
ENSG00000050438	SLC4A8	-0.228645	0.322088	0.514461	3473.48	4070.47	3489.56	4505.94	3005.69	4713.28	3624.16	2060.89	3673.61	3126.73
ENSG00000050555	LAMC3	-3.9032	7.12281e-06	8.78884e-05	933.173	854.476	232.637	19.093	46.7849	46.938	186.846	83.6354	635.817	2330
ENSG00000050628	PTGER3	1.02637	0.194461	0.368924	81.4675	175.891	84.1271	11.8195	371.415	54.0229	70.7584	89.0899	44.481	30.1033
ENSG00000050748	MAPK9	-0.433664	0.00473972	0.0221854	1618.77	1517.45	1764.09	1470.16	1184.9	1626.89	1974.6	1117.26	1389.38	1995.85
ENSG00000050767	COL23A1	-1.69953	0.128333	0.276525	17.9863	27.0601	2.57532	7.27351	5.72877	1.77124	3.3168	2.72724	5.23306	61.2101
ENSG00000050820	BCAR1	1.21299	6.32915e-11	2.28164e-09	1388.12	1395.68	1886.85	3663.12	3603.39	1664.97	1702.62	4401.77	1410.31	2293.87
ENSG00000051009	FAM160A2	0.14848	0.57895	0.739594	1508.74	1358.21	877.326	1510.16	1104.7	837.798	872.318	859.081	784.959	1073.69
ENSG00000051108	HERPUD1	-0.574275	0.00301124	0.0153277	1442.08	2096.12	1572.66	1091.94	933.789	1120.31	1418.48	1173.62	1813.26	1654.68
ENSG00000051128	HOMER3	-0.334598	0.501313	0.678372	143.891	140.505	135.634	94.5557	73.5192	159.412	121.616	267.27	172.691	407.398
ENSG00000051180	RAD51	0.223463	0.644693	0.787652	38.0887	24.9786	23.1779	53.6422	13.3671	26.5687	17.6896	20.9088	27.4736	18.062
ENSG00000051341	POLQ	0.0576272	0.926393	0.96128	24.3344	16.6524	9.44284	25.4573	20.0507	19.4837	5.528	5.45448	26.1653	13.0448
ENSG00000051382	PIK3CB	-0.17589	0.36327	0.557546	551.228	485.001	641.255	450.049	533.73	642.076	661.149	481.813	502.374	378.298
ENSG00000051523	CYBA	-0.227452	0.653801	0.793636	755.426	499.572	780.322	409.135	356.138	378.16	485.358	1267.26	1125.11	1529.25
ENSG00000051596	THOC3	-0.62093	0.0423706	0.123796	445.426	504.776	617.218	255.482	289.303	524.288	359.32	280.906	230.255	278.957
ENSG00000051620	HEBP2	-0.17779	0.340515	0.534694	562.866	811.804	844.705	519.147	767.655	761.635	876.741	680.901	627.967	705.421
ENSG00000051825	MPHOSPH9	0.0980273	0.578038	0.738968	461.296	365.312	368.271	487.325	382.872	420.67	358.214	338.178	366.314	294.009
ENSG00000052126	PLEKHA5	-0.527629	0.00520615	0.0239195	1408.22	1862.99	1621.59	991.016	1309.02	2359.3	1799.92	1285.44	1429.93	1575.41
ENSG00000052344	PRSS8	-1.9419	0.0149961	0.0557117	20.1024	49.9572	28.3285	10.9103	14.3219	60.2223	9.9504	17.2725	184.465	29.0999
ENSG00000052723	SIKE1	-0.283114	0.11215	0.250917	416.86	327.844	522.79	382.769	344.681	560.599	499.731	400.904	430.419	443.522
ENSG00000052749	RRP12	0.334925	0.123579	0.268987	954.333	869.047	774.313	1596.54	868.863	1119.43	754.019	932.716	939.334	876.007
ENSG00000052795	FNIP2	-0.683176	7.06008e-08	1.44059e-06	454.948	458.982	445.53	300.032	268.297	441.925	406.861	282.724	421.261	557.915
ENSG00000052802	MSMO1	-0.535791	0.00928927	0.0384172	436.962	810.764	673.876	340.946	429.657	565.912	528.477	475.449	635.817	562.932
ENSG00000052841	TTC17	-0.203983	0.100791	0.231951	1583.85	1808.87	1426.73	1545.62	1351.03	1542.75	1671.67	1167.26	1420.78	1468.04
ENSG00000052850	ALX4	3.29064	NA	NA	2.11604	6.24465	0	3.63676	0.954794	0.885622	1.1056	111.817	6.54132	11.0379
ENSG00000053108	FSTL4	-2.19091	0.00817184	0.0347087	144.949	376.76	160.528	30.9124	32.463	71.7354	50.8576	16.3634	13.0826	31.1068
ENSG00000053254	FOXN3	-0.293757	0.0808308	0.198806	518.429	489.164	538.242	399.134	467.849	736.837	543.955	514.539	631.892	492.691
ENSG00000053328	METTL24	0.284668	0.302364	0.494859	55.017	60.3649	85.844	71.826	66.8356	40.7386	42.0128	73.6355	64.105	58.1998
ENSG00000053371	AKR7A2	0.102312	0.434427	0.624396	946.927	1111.55	1357.19	1278.32	1301.38	1323.12	1244.91	1195.44	1072.78	1144.93
ENSG00000053372	MRTO4	0.258395	0.0403548	0.119274	456.006	464.186	532.233	591.882	614.887	542.001	550.589	568.175	515.456	401.378
ENSG00000053438	NNAT	6.63052	1.30164e-59	1.75294e-56	7734.12	1597.59	4008.92	349159	504010	3009.34	2966.32	332611	3226.18	5382.47
ENSG00000053501	USE1	0.749721	1.58731e-06	2.36578e-05	449.658	453.778	429.22	579.154	823.033	375.504	509.682	809.081	385.938	464.595
ENSG00000053524	MCF2L2	-0.105197	0.58297	0.742514	732.149	546.407	738.259	755.536	668.356	650.046	943.077	538.176	596.569	717.462
ENSG00000053702	NRIP2	-0.498925	0.161438	0.324528	248.635	235.215	202.592	209.114	175.682	187.752	287.456	223.634	259.036	586.011
ENSG00000053747	LAMA3	1.87016	0.000767907	0.00496336	307.884	321.599	163.962	856.456	1012.08	34.5392	163.629	754.537	222.405	460.581
ENSG00000053770	AP5M1	0.285762	0.0728621	0.184469	873.924	751.439	921.965	923.736	1125.7	983.926	1009.41	1069.08	672.448	752.583
ENSG00000053900	ANAPC4	0.134232	0.411552	0.602344	641.16	661.933	455.832	652.798	536.594	482.664	477.619	606.357	597.877	503.729
ENSG00000053918	KCNQ1	-1.59308	0.00854502	0.0359375	98.3958	254.99	117.606	30.9124	38.1918	37.1961	96.1872	86.3626	167.458	323.109
ENSG00000054116	TRAPPC3	0.248873	0.0345025	0.105945	1603.96	1828.64	1651.64	2038.4	2169.29	1556.92	1674.98	1605.44	1467.87	1628.59
ENSG00000054118	THRAP3	0.0691568	0.532085	0.702752	3716.82	3122.32	3487.84	3598.57	3516.51	3683.3	3586.57	3495.41	2759.13	3238.11
ENSG00000054148	PHPT1	0.850925	3.72278e-09	9.68127e-08	2919.07	3208.71	2713.53	6034.29	4526.68	2458.49	2409.1	4229.04	2732.97	2692.24
ENSG00000054179	ENTPD2	1.37097	0.000417813	0.00298581	121.672	97.8328	88.4193	293.668	102.163	91.219	103.926	452.722	130.826	132.455
ENSG00000054219	LY75	-1.03172	0.110754	0.248915	25.3925	22.897	18.8857	16.3654	6.68356	28.3399	11.056	22.727	81.1124	32.1102
ENSG00000054267	ARID4B	0.039033	0.714805	0.834479	1285.49	1342.6	1382.09	1400.15	1455.11	1453.31	1440.6	1236.35	1244.16	1140.92
ENSG00000054277	OPN3	-2.97438	0.00021198	0.00167786	35.9727	48.9164	70.3921	1.81838	0	30.9968	58.5968	18.1816	36.6314	86.2962
ENSG00000054282	SDCCAG8	0.179376	0.212796	0.39207	540.648	654.647	721.09	627.341	887.004	729.752	693.211	743.628	675.065	636.184
ENSG00000054356	PTPRN	-1.30815	6.37287e-09	1.58515e-07	17183.3	18096	14796.9	6400.69	9916.49	21758.8	17801.3	5575.39	22978.4	13877.6
ENSG00000054392	HHAT	-1.3021	0.0143763	0.0538905	485.631	513.102	153.661	279.121	53.4685	339.193	284.139	87.2717	452.66	188.647
ENSG00000054523	KIF1B	-0.788536	4.02366e-06	5.32366e-05	6013.78	5948.03	4732.58	2836.67	3557.56	5773.37	4631.36	2498.15	4141.97	4595.77
ENSG00000054598	FOXC1	0.488299	0.557176	0.722688	217.952	110.322	181.989	57.2789	33.4178	59.3367	142.622	757.264	245.954	452.553
ENSG00000054611	TBC1D22A	0.223215	0.0552178	0.150517	798.804	829.498	718.514	928.282	988.212	782.004	741.857	929.08	826.823	991.403
ENSG00000054654	SYNE2	1.12134	8.8755e-19	8.40898e-17	2274.74	1845.29	1902.3	5363.31	4128.53	1996.19	2168.08	3977.23	2244.98	2017.93
ENSG00000054690	PLEKHH1	1.07582	NA	NA	1208.26	1116.75	970.037	5378.76	1123.79	1119.43	947.499	874.535	1143.42	1660.7
ENSG00000054793	ATP9A	-1.01582	2.81782e-11	1.09541e-09	5918.56	5669.1	5184.12	2617.56	2794.68	5505.02	5935.97	2641.79	6014.09	3774.96
ENSG00000054803	CBLN4	1.99752	NA	NA	4.23208	0	2.57532	1.81838	1.90959	0	3.3168	66.3629	7.84959	23.0792
ENSG00000054965	FAM168A	0.37486	0.117501	0.25938	2220.78	1792.21	2125.5	4075.9	2254.27	2419.52	1950.28	1761.8	1946.7	2105.23
ENSG00000054967	RELT	0.825236	0.0831654	0.202925	238.054	156.116	118.465	500.054	97.389	108.931	97.2928	177.271	122.977	178.613
ENSG00000054983	GALC	-0.467436	0.0142826	0.0536208	1280.2	1392.56	788.048	733.716	841.174	1078.69	1305.71	919.989	1217.99	988.392
ENSG00000055044	NOP58	-0.00398506	0.97972	0.988463	856.996	1092.81	880.76	871.003	1127.61	1141.57	1075.75	1042.72	1197.06	872.996
ENSG00000055070	SZRD1	0.243586	0.0164151	0.0597355	1926.65	1917.11	2244.82	2307.52	2288.64	2067.04	1911.58	2409.06	1661.5	2070.11
ENSG00000055118	KCNH2	0.705896	0.00406263	0.0196	2974.09	4475.33	6433.15	9341.01	6699.79	4625.6	3676.12	7160.83	5965.69	5039.3
ENSG00000055130	CUL1	0.188899	0.0283498	0.091123	1804.98	1848.42	1607	2140.23	2098.64	1951.91	1701.52	1876.34	1774.01	1829.28
ENSG00000055147	FAM114A2	-0.00610744	0.963126	0.979597	297.303	356.986	342.518	385.496	376.189	378.16	399.122	338.178	421.261	384.319
ENSG00000055163	CYFIP2	0.482752	0.00757629	0.0326061	2978.32	2410.43	2529.82	4451.39	3462.08	2286.68	2379.25	2456.33	2273.76	2456.43
ENSG00000055208	TAB2	0.118642	0.306779	0.499353	1298.19	1101.14	1061.03	1188.31	1179.17	1104.37	1268.12	1272.71	992.973	997.423
ENSG00000055211	GINM1	0.929834	2.9808e-06	4.10935e-05	773.412	793.07	691.903	982.834	1587.82	653.589	893.325	1856.34	835.981	782.686
ENSG00000055332	EIF2AK2	-0.00980152	0.962887	0.979523	1073.89	938.779	1267.06	1167.4	1326.21	1864.23	1460.5	1315.44	1193.14	1148.94
ENSG00000055483	USP36	0.0750661	0.537115	0.706782	1435.73	1420.66	1088.5	1400.15	1291.84	1352.34	1107.81	1299.98	1182.67	1254.31
ENSG00000055609	KMT2C	0.270556	0.0544551	0.148948	2126.62	1636.1	1764.95	2632.1	2125.37	1859.81	1916	1809.07	1712.52	1685.79
ENSG00000055732	MCOLN3	1.94509	0.00170517	0.00956538	399.931	559.937	210.318	1590.17	1036.91	108.046	40.9072	794.536	313.984	440.512
ENSG00000055813	CCDC85A	2.61117	2.91732e-09	7.75785e-08	68.7712	60.3649	67.8168	566.425	160.405	27.4543	59.7024	247.27	31.3984	56.1929
ENSG00000055917	PUM2	0.0626225	0.634848	0.781243	1971.09	2123.18	2274.01	2418.44	2193.16	2221.14	2456.64	1958.16	1862.97	1767.06
ENSG00000055950	MRPL43	0.402411	0.00222439	0.0119245	1107.75	1456.04	1256.76	1402.88	1654.66	1091.09	1206.21	1629.07	1012.6	1140.92
ENSG00000055955	ITIH4	-0.472066	0.133657	0.284394	59.2491	57.2426	38.6298	46.3687	32.463	45.1667	32.0624	24.5452	48.4058	54.186
ENSG00000056050	HPF1	0.0688983	0.684965	0.814168	303.652	410.065	476.434	485.507	468.804	427.755	507.47	389.995	433.036	431.481
ENSG00000056097	ZFR	-0.224162	0.121226	0.26509	2105.46	2209.56	2007.89	1852.93	1785.47	2577.16	2308.49	1748.16	1691.59	1778.1
ENSG00000056277	ZNF280C	0.313102	0.181002	0.350912	67.7132	57.2426	39.4882	71.826	69.7	48.7092	58.5968	59.9993	61.4884	47.1619
ENSG00000056487	PHF21B	0.587813	0.0134802	0.0512723	773.412	554.733	545.109	1171.95	778.157	515.432	556.117	618.175	620.118	423.453
ENSG00000056558	TRAF1	-0.732532	0.00760714	0.0326931	456.006	330.966	434.371	295.487	345.635	397.644	507.47	243.634	817.666	488.677
ENSG00000056586	RC3H2	-0.193586	0.251498	0.438726	1326.76	896.107	1360.63	1101.03	1058.87	1215.07	1073.54	819.99	1054.46	1022.51
ENSG00000056736	IL17RB	-0.0378212	0.925884	0.961056	55.017	64.528	59.2324	50.9146	38.1918	44.2811	37.5904	46.3631	14.3909	48.1653
ENSG00000056972	TRAF3IP2	0.0203989	0.924209	0.960002	369.249	594.282	580.306	560.061	445.889	689.014	510.787	692.719	535.08	628.156
ENSG00000056998	GYG2	-1.19679	0.30188	0.494313	194.676	249.786	78.9765	3.63676	2.86438	114.245	19.9008	128.18	58.8719	4.01378
ENSG00000057019	DCBLD2	1.09723	0.000475304	0.00331657	633.753	465.226	473.001	1754.74	907.054	565.912	651.198	693.628	556.013	315.081
ENSG00000057149	SERPINB3	-2.49842	0.18429	0.355206	0	8.3262	0.85844	0	1.90959	7.9706	0	0	1737.38	5.01722
ENSG00000057252	SOAT1	-0.499882	0.0147246	0.0549086	1190.27	1383.19	1386.38	961.013	1258.42	1771.24	1734.69	1069.08	2115.46	1271.36
ENSG00000057294	PKP2	1.30279	0.00437486	0.0208248	360.785	108.241	303.029	580.972	1294.7	273.657	267.555	673.629	603.11	495.701
ENSG00000057593	F7	-0.531359	0.446384	0.635274	21.1604	22.897	13.735	3.63676	20.0507	5.31373	42.0128	19.9998	28.7818	14.0482
ENSG00000057608	GDI2	0.0968166	0.390095	0.582621	2520.2	3258.67	2867.19	2971.23	2991.37	3012.89	3278.1	3603.59	2931.82	3004.31
ENSG00000057657	PRDM1	-1.33177	0.0238182	0.0797067	89.9316	39.5494	95.2869	40.9135	22.9151	46.0523	87.3424	62.7265	117.744	267.92
ENSG00000057663	ATG5	-0.175907	0.249854	0.436827	329.044	407.984	511.63	375.495	409.607	487.978	420.128	374.541	425.186	471.619
ENSG00000057704	TMCC3	-0.19466	0.502426	0.679582	745.904	788.907	954.585	880.095	578.605	1026.44	468.774	871.808	1309.57	930.193
ENSG00000057757	PITHD1	0.994192	2.41526e-11	9.50674e-10	1308.77	1374.86	1637.05	2408.44	3695.05	1554.27	1550.05	2928.15	1484.88	1667.72
ENSG00000057935	MTA3	-0.195841	0.219689	0.400195	1897.03	1484.14	1663.66	1652.91	1493.3	1889.92	1691.57	1149.99	1499.27	1354.65
ENSG00000058056	USP13	0.452985	0.100541	0.23151	354.436	276.846	380.289	747.354	530.866	621.706	497.52	436.359	344.074	446.533
ENSG00000058063	ATP11B	0.0158519	0.926751	0.961373	901.432	902.352	897.07	1136.49	736.146	838.684	983.984	769.991	892.237	684.349
ENSG00000058085	LAMC2	0.758741	0.00548868	0.0250748	718.395	490.205	1009.53	1496.53	1642.25	1245.18	982.878	1729.98	1237.62	1030.54
ENSG00000058091	CDK14	-0.108307	0.726473	0.842007	1369.08	1274.95	1315.13	2272.06	1579.23	1664.97	2578.26	1030.9	2400.67	1678.76
ENSG00000058262	SEC61A1	0.241963	0.16346	0.326989	5539.79	6143.69	4214.94	7260.79	4840.81	4395.34	4496.47	5379.94	5119.24	4584.74
ENSG00000058272	PPP1R12A	0.488174	0.000411683	0.00294904	1150.07	999.144	1115.97	1450.16	1866.62	1060.09	1354.36	1649.98	1228.46	1355.65
ENSG00000058335	RASGRF1	-3.72884	0.000838922	0.0053474	20.1024	939.82	42.922	26.3665	10.5027	224.062	35.3792	6.36356	39.2479	36.124
ENSG00000058404	CAMK2B	0.654658	1.94659e-07	3.5771e-06	3717.88	3104.63	3869.85	4915.99	6266.31	3997.7	3953.63	5863.57	3408.03	3211.02
ENSG00000058453	CROCC	0.196612	0.47093	0.654208	1658.97	1400.88	1558.93	2796.67	1475.16	1253.15	1524.62	1641.8	2408.52	2237.68
ENSG00000058600	POLR3E	-0.0955214	0.664444	0.800782	1820.85	1689.18	1267.92	2030.22	1116.15	1419.65	1302.4	1157.26	1736.07	1495.13
ENSG00000058668	ATP2B4	0.219022	0.467102	0.651772	1061.19	1599.67	1198.38	1527.44	778.157	684.586	839.15	1607.25	1177.44	1284.41
ENSG00000058673	ZC3H11A	0.0147261	0.821684	0.902063	3143.38	3013.04	3201.98	3117.61	3340.82	3399.02	3347.76	3167.24	3088.81	3033.41
ENSG00000058729	RIOK2	0.292343	0.079539	0.196629	241.228	271.642	291.87	342.764	443.979	333.879	310.674	329.087	362.389	315.081
ENSG00000058799	YIPF1	0.0504361	0.712017	0.832932	422.15	540.162	407.759	430.047	518.453	424.213	393.594	440.904	490.599	453.557
ENSG00000058804	NDC1	-0.398799	0.0179467	0.0639998	194.676	228.97	191.432	153.653	151.812	195.722	203.43	149.089	238.104	148.51
ENSG00000058866	DGKG	-1.45629	0.00650246	0.0286979	175.631	261.234	395.741	308.215	69.7	665.988	674.416	82.7263	317.908	458.574
ENSG00000059122	FLYWCH1	0.146959	0.424244	0.614859	2481.06	2299.07	1598.42	2060.22	2501.56	2052.87	1766.75	2215.43	1622.25	2460.44
ENSG00000059145	UNKL	-0.513637	4.55159e-05	0.000445102	876.04	819.09	700.487	559.151	558.555	700.527	776.131	464.54	740.478	659.263
ENSG00000059377	TBXAS1	-0.62077	0.217475	0.397776	133.31	105.118	276.418	124.559	100.253	128.415	72.9696	162.725	346.69	328.126
ENSG00000059378	PARP12	0.379101	0.121865	0.266023	194.676	325.763	311.614	263.665	348.5	220.52	256.499	472.722	336.224	302.037
ENSG00000059573	ALDH18A1	-0.714103	2.18395e-06	3.13605e-05	1202.97	1330.11	1330.58	988.289	652.124	1379.8	1150.93	782.718	1543.75	1339.6
ENSG00000059588	TARBP1	-0.845194	0.000525683	0.00360277	1197.68	1394.64	933.124	760.082	609.159	892.707	1096.76	372.723	931.485	855.938
ENSG00000059691	GATB	0.192859	0.0395635	0.117414	371.365	369.475	353.677	415.5	395.285	356.906	347.158	390.905	310.059	341.171
ENSG00000059728	MXD1	-0.149958	0.502991	0.680154	619.999	511.02	549.402	354.584	490.764	541.115	457.718	463.631	320.525	386.326
ENSG00000059758	CDK17	0.251197	0.0504471	0.140519	472.935	544.325	564.854	770.083	604.385	578.311	610.291	636.356	537.697	633.173
ENSG00000059769	DNAJC25	-0.209166	0.276502	0.467298	240.17	344.496	244.655	259.119	217.693	322.366	263.133	212.725	230.255	213.734
ENSG00000059804	SLC2A3	-0.106967	0.681016	0.811605	632.695	825.334	546.826	528.239	543.278	517.203	595.918	825.445	614.884	1034.55
ENSG00000059915	PSD	-0.2997	0.165456	0.329967	12302.6	10975	6694.12	9519.21	9564.17	10357.3	9201.91	6750.83	11945.8	12722.7
ENSG00000060069	CTDP1	0.306898	0.00118112	0.00704707	585.085	685.871	594.041	800.087	768.609	650.932	560.539	760.9	642.358	675.318
ENSG00000060138	YBX3	1.64449	0.0019265	0.0105834	321.638	247.704	297.02	321.853	704.638	127.53	236.598	1930.89	430.419	546.877
ENSG00000060140	STYK1	0.37546	0.69716	0.822642	59.2491	97.8328	12.8766	17.2746	52.5137	5.31373	6.6336	50.9085	31.3984	4.01378
ENSG00000060237	WNK1	-0.223283	0.152737	0.311791	4025.76	3497	3662.11	3939.52	2859.61	4583.98	3992.32	2950.87	3058.72	3735.82
ENSG00000060339	CCAR1	0.0141496	0.922185	0.959154	1131.02	1147.97	1465.36	1341.96	1382.54	1383.34	1313.45	1369.98	1724.29	1297.45
ENSG00000060491	OGFR	-0.447361	0.00428272	0.0204888	2313.89	2728.91	2182.15	1540.17	1866.62	1734.93	2085.16	1671.8	2604.76	2510.62
ENSG00000060558	GNA15	0.0517051	0.942101	0.96972	37.0307	32.264	77.2596	20.0022	27.689	15.0556	26.5344	118.18	108.586	77.2652
ENSG00000060642	PIGV	0.0751817	0.514866	0.690424	374.539	456.9	395.741	386.405	413.426	381.703	356.003	446.358	426.494	370.271
ENSG00000060656	PTPRU	0.752046	0.191632	0.365137	105.802	134.26	42.922	343.674	222.467	146.128	103.926	215.452	438.269	113.389
ENSG00000060688	SNRNP40	0.0487808	0.684592	0.813981	970.204	975.206	997.507	998.29	1170.58	1044.15	969.611	859.081	1030.91	841.89
ENSG00000060709	RIMBP2	-0.705681	7.87797e-05	0.000710676	1623	1877.56	1827.62	1111.94	1325.25	2403.58	1979.02	945.444	1437.78	1719.9
ENSG00000060718	COL11A1	7.37516	1.21372e-27	2.48734e-25	166.109	63.4873	14.5935	9094.62	10903.7	109.817	38.696	10839	27.4736	13.0448
ENSG00000060749	QSER1	-0.191812	0.195279	0.369852	361.843	323.681	338.225	357.311	309.353	391.445	478.725	316.36	375.472	352.209
ENSG00000060762	MPC1	-0.0289255	0.898555	0.946337	355.494	380.924	642.113	389.133	579.56	560.599	522.949	539.085	552.088	573.97
ENSG00000060971	ACAA1	0.382885	0.0213134	0.0731954	1011.47	1084.49	1033.56	1463.79	1177.26	864.367	730.801	1040.9	843.831	1018.5
ENSG00000060982	BCAT1	-0.597188	0.461314	0.647336	38.0887	13.5301	91.8531	15.4562	18.1411	14.1699	91.7648	85.4535	35.3232	135.465
ENSG00000061273	HDAC7	-0.508764	0.0216914	0.0742232	2158.36	1772.44	1594.12	1301.05	1473.25	1485.19	1416.27	1204.53	2034.35	2749.44
ENSG00000061337	LZTS1	-2.22621	0.0103699	0.0418523	295.187	90.5474	113.314	29.0941	19.0959	30.1111	93.976	94.5444	117.744	817.807
ENSG00000061656	SPAG4	-0.659045	0.0818062	0.200595	131.194	244.582	200.875	191.839	135.581	375.504	132.672	96.3625	291.743	184.634
ENSG00000061676	NCKAP1	-0.587341	0.000145091	0.00120668	4735.69	5784.63	4074.16	3263.99	2893.98	4658.37	5383.17	3111.78	4110.57	3751.88
ENSG00000061794	MRPS35	0.231225	0.0993947	0.230106	531.126	655.688	583.739	625.522	823.987	613.736	634.614	606.357	553.396	512.76
ENSG00000061918	GUCY1B1	-1.99827	7.24553e-05	0.000662352	325.87	397.576	764.87	81.827	61.1068	412.7	637.931	281.815	418.645	1002.44
ENSG00000061936	SFSWAP	-0.203404	0.180035	0.349808	1672.73	1715.2	1297.96	1446.52	1268.92	1398.4	1175.25	1134.53	1473.11	1611.53
ENSG00000061938	TNK2	0.0639898	0.767009	0.868302	4074.43	2984.94	3512.74	5281.48	3568.07	4579.55	3275.89	3859.05	4607.71	5332.3
ENSG00000061987	MON2	-0.176434	0.240168	0.425136	1328.87	1623.61	1110.82	1209.22	1211.63	1304.52	1278.07	983.625	1257.24	1074.69
ENSG00000062038	CDH3	-4.21257	2.19113e-51	2.17429e-48	2137.2	1894.21	1853.37	72.7351	165.179	1866.01	2044.25	61.8175	1486.19	1668.73
ENSG00000062194	GPBP1	0.0670524	0.689063	0.816894	1810.27	1678.77	2143.53	2046.59	2115.82	2249.48	2587.1	2047.25	1708.59	1651.67
ENSG00000062282	DGAT2	-3.49448	9.14988e-06	0.000110231	639.044	1953.53	365.696	61.8249	60.152	667.759	225.542	32.7269	126.902	89.3065
ENSG00000062370	ZNF112	0.0824573	0.627686	0.775975	217.952	189.421	166.537	230.934	203.371	183.324	162.523	156.362	179.232	202.696
ENSG00000062485	CS	0.305801	0.00739195	0.0319651	2361.5	2351.11	2320.36	3237.62	2600.86	2281.36	2499.76	2631.79	1903.53	2268.79
ENSG00000062524	LTK	-1.36688	0.107252	0.242636	7.40613	16.6524	13.735	7.27351	1.90959	4.42811	15.4784	14.5453	51.0223	35.1205
ENSG00000062582	MRPS24	0.107995	0.44458	0.633713	383.003	356.986	380.289	325.49	445.889	409.157	422.339	471.813	351.923	386.326
ENSG00000062598	ELMO2	0.151375	0.297268	0.48975	1082.35	963.757	1154.6	1122.85	1039.77	933.445	831.411	1202.71	890.928	1211.16
ENSG00000062650	WAPL	0.0925774	0.513433	0.688987	701.467	738.95	971.754	984.652	906.1	898.02	977.35	833.627	890.928	782.686
ENSG00000062716	VMP1	-0.0482635	0.778866	0.87555	836.893	1018.92	1177.78	936.465	912.783	984.811	1035.95	1269.08	1164.36	1305.48
ENSG00000062725	APPBP2	-0.167883	0.141539	0.295327	1275.97	1115.71	1254.18	1084.66	1129.52	1296.55	1280.28	976.352	1146.04	992.406
ENSG00000062822	POLD1	0.144619	0.625545	0.774597	707.815	614.057	339.942	840.091	436.341	553.514	389.171	421.813	510.223	470.615
ENSG00000063015	SEZ6	-1.59463	0.00388138	0.0188997	249.693	355.945	220.619	156.381	53.4685	278.085	731.907	112.726	81.1124	356.223
ENSG00000063046	EIF4B	0.250125	0.174592	0.34244	10578.1	9238.96	7647.84	9242.82	12241.4	12409.3	11111.3	13526.2	8525.96	9175.49
ENSG00000063169	BICRA	0.558753	0.0103817	0.0418778	477.167	411.106	519.356	906.462	544.233	404.729	402.438	516.358	365.006	534.836
ENSG00000063176	SPHK2	0.266318	0.12911	0.27736	1219.9	1064.71	1203.53	1421.06	1511.44	1032.63	956.344	936.353	900.086	1125.86
ENSG00000063177	RPL18	0.297554	0.0572065	0.154634	7665.35	9298.28	8472.8	7641.74	11731.6	8255.77	9180.9	12487.1	8979.93	8633.63
ENSG00000063180	CA11	0.0306292	0.861487	0.924549	1651.57	2011.82	2189.02	2132.96	1972.6	2537.31	1695.99	2398.15	2144.25	2625.01
ENSG00000063241	ISOC2	0.03304	0.9196	0.957743	1177.58	978.328	1180.36	1621.99	713.231	574.769	1044.79	616.356	863.455	912.131
ENSG00000063244	U2AF2	0.174502	0.129029	0.277264	6704.67	6915.95	6316.4	8299.08	6788.59	6871.54	6317.4	6649.92	5333.8	6479.24
ENSG00000063245	EPN1	0.444567	1.70411e-06	2.52589e-05	3115.87	2687.28	3045.75	4172.27	3889.83	2810.08	3006.13	3779.96	2528.88	3105.66
ENSG00000063322	MED29	-0.0393181	0.775581	0.873368	2263.1	2335.5	2824.27	2183.87	2893.98	2808.31	2925.42	2486.33	2264.61	2712.31
ENSG00000063438	AHRR	-1.04409	0.0581378	0.156478	57.133	74.9358	23.1779	15.4562	33.4178	92.1047	26.5344	20.9088	34.0149	27.093
ENSG00000063587	ZNF275	-1.5764	2.33893e-05	0.000251415	1319.35	2209.56	1031.85	380.041	420.109	1238.98	773.92	340.905	592.644	772.652
ENSG00000063601	MTMR1	-0.112346	0.454873	0.642555	450.716	515.184	374.28	443.684	423.929	364.876	458.824	363.632	501.065	444.526
ENSG00000063660	GPC1	-0.823512	0.177971	0.34689	8659.89	3747.83	794.057	1958.39	1440.78	2454.06	1249.33	2020.89	4026.84	1449.98
ENSG00000063761	ADCK1	-0.190636	0.32103	0.513506	348.088	286.213	251.523	245.481	267.342	231.147	226.648	193.634	232.871	304.044
ENSG00000063854	HAGH	0.550419	0.00214003	0.0115478	2550.88	2230.38	3081.8	2734.84	4204.91	2427.49	2171.4	3959.95	2110.23	2790.58
ENSG00000063978	RNF4	-0.313943	1.11433e-06	1.7306e-05	1110.92	1098.02	1140.01	909.189	900.371	1145.99	1128.82	879.081	1025.68	1141.92
ENSG00000064012	CASP8	-0.0952941	0.864927	0.926132	24.3344	45.7941	72.9674	54.5514	70.6548	39.853	80.7088	98.1807	155.684	138.475
ENSG00000064042	LIMCH1	0.619178	0.00671716	0.0294925	1420.92	941.901	891.919	2447.54	1509.53	1207.99	1451.65	1419.98	1112.03	1142.92
ENSG00000064102	INTS13	0.112111	0.474011	0.656891	350.204	298.702	387.157	387.315	380.008	448.125	422.339	426.359	351.923	317.088
ENSG00000064115	TM7SF3	-0.39893	0.00164328	0.00928175	959.623	885.699	899.645	651.889	768.609	1090.2	823.672	754.537	1105.48	928.186
ENSG00000064199	SPA17	-0.511886	0.0301872	0.0959555	289.897	227.93	455.832	225.479	271.162	297.569	354.898	244.543	417.336	422.45
ENSG00000064201	TSPAN32	-1.03496	0.0654949	0.170832	76.1774	62.4465	22.3194	25.4573	11.4575	30.1111	17.6896	18.1816	24.857	30.1033
ENSG00000064205	WISP2	3.24083	0.000516548	0.00355049	15.8703	10.4077	6.86752	36.3676	21.0055	11.5131	5.528	409.995	54.9471	11.0379
ENSG00000064225	ST3GAL6	-1.46733	0.00169657	0.00952566	160.819	60.3649	196.583	30.0032	39.1466	84.1341	218.909	76.3627	122.977	95.3272
ENSG00000064270	ATP2C2	-5.36421	1.65356e-35	5.99541e-33	388.293	383.005	371.705	19.093	7.63835	379.932	307.357	3.63632	715.621	379.302
ENSG00000064300	NGFR	0.665136	NA	NA	110.034	248.745	127.049	28.1849	60.152	100.075	39.8016	484.54	109.894	107.369
ENSG00000064309	CDON	0.354514	0.30285	0.495352	263.447	301.825	212.893	168.2	265.433	147.013	168.051	330.905	194.931	107.369
ENSG00000064313	TAF2	0.198279	0.119753	0.26266	478.225	430.881	547.685	631.887	580.515	514.546	515.21	473.631	463.126	476.636
ENSG00000064393	HIPK2	0.0684018	0.79733	0.886983	912.013	849.272	1171.77	1311.96	1512.39	1709.25	1059.16	1249.08	1708.59	1654.68
ENSG00000064419	TNPO3	0.336292	0.00188837	0.0103951	795.63	761.847	722.807	950.103	1008.26	668.644	805.982	942.716	714.313	893.065
ENSG00000064489	BORCS8-MEF2B	0.448596	0.372778	0.566301	27.5085	20.8155	18.8857	12.7287	24.8246	9.74184	7.7392	33.636	17.0074	20.0689
ENSG00000064490	RFXANK	0.44539	0.0018316	0.0101508	678.19	628.628	636.963	942.829	963.387	685.471	615.819	947.262	724.779	920.158
ENSG00000064545	TMEM161A	0.117854	0.598331	0.754426	452.832	439.207	322.773	573.698	383.827	327.68	360.426	399.086	459.201	556.911
ENSG00000064547	LPAR2	-0.15876	0.732566	0.845949	141.775	138.423	65.2415	151.835	75.4287	67.3073	50.8576	49.9994	154.375	105.362
ENSG00000064601	CTSA	-0.531776	0.0143773	0.0538905	3159.25	3407.5	2236.24	1664.73	1592.6	2186.6	1759.01	2098.16	2600.83	2717.33
ENSG00000064607	SUGP2	0.141666	0.497012	0.674536	4150.61	3831.09	3180.52	5546.96	3528.92	3593.85	3062.51	2836.33	3362.24	4014.78
ENSG00000064651	SLC12A2	0.242996	0.35527	0.549726	349.146	293.499	272.984	488.235	429.657	348.935	426.762	501.812	512.84	597.049
ENSG00000064652	SNX24	0.362659	0.0688428	0.177099	246.518	242.501	370.846	470.96	343.726	338.308	338.314	333.632	260.345	284.978
ENSG00000064655	EYA2	1.85714	NA	NA	11.6382	13.5301	15.4519	1.81838	5.72877	33.6536	12.1616	178.18	159.608	16.0551
ENSG00000064666	CNN2	-0.139601	0.84497	0.915544	174.573	155.075	299.596	78.1903	64.926	192.18	343.842	719.083	342.765	708.431
ENSG00000064687	ABCA7	0.0172565	0.960665	0.978624	9832.17	6628.69	6011.66	13426	5066.14	5644.95	7429.63	4021.77	8565.21	7796.76
ENSG00000064692	SNCAIP	0.555335	NA	NA	8.46415	5.20387	15.4519	5.45514	3.81918	12.3987	6.6336	58.1811	53.6389	6.02066
ENSG00000064703	DDX20	-0.498528	0.000821453	0.00525184	272.969	400.698	315.906	217.296	270.207	326.794	339.419	216.361	329.683	334.147
ENSG00000064726	BTBD1	0.189334	0.114661	0.254992	1168.05	1208.34	1255.9	1592.9	1304.25	1533.9	1302.4	1476.35	1327.89	1152.96
ENSG00000064763	FAR2	-0.853793	0.0729505	0.184668	79.3514	46.8349	70.3921	56.3697	44.8753	88.5622	75.1808	60.9084	87.6537	235.809
ENSG00000064787	BCAS1	-1.5147	0.112484	0.251365	9.52217	7.28542	11.1597	10.0011	6.68356	28.3399	26.5344	19.0907	143.909	13.0448
ENSG00000064835	POU1F1	-3.20167	0.00156672	0.00892366	9.52217	20.8155	266.116	14.547	4.77397	69.9641	241.021	10.909	23.5488	18.062
ENSG00000064886	CHI3L2	-0.189688	0.874308	0.931546	3.17406	11.4485	1.71688	1.81838	3.81918	55.7942	7.7392	28.1815	7.84959	2.00689
ENSG00000064932	SBNO2	0.291443	0.0886093	0.212064	940.579	855.517	893.636	1312.87	840.219	774.919	787.187	1169.08	1047.92	1036.56
ENSG00000064933	PMS1	-0.14394	0.406808	0.598141	478.225	538.081	412.051	510.964	405.788	579.197	472.091	423.631	590.027	388.333
ENSG00000064961	HMG20B	0.384312	0.0978849	0.227702	717.337	631.75	538.242	834.636	726.598	642.076	723.062	1191.8	637.125	1032.54
ENSG00000064989	CALCRL	-0.915304	0.159942	0.322402	349.146	116.567	319.34	185.475	63.0164	51.3661	402.438	230.906	215.864	655.249
ENSG00000064995	TAF11	0.494568	0.00152749	0.00872179	340.682	363.23	421.494	519.147	680.768	404.729	454.402	485.449	361.081	443.522
ENSG00000064999	ANKS1A	0.122805	0.364124	0.55851	780.818	719.175	727.957	945.557	813.485	723.553	650.093	646.356	737.861	814.797
ENSG00000065000	AP3D1	0.359161	0.042117	0.123323	6858.08	5886.62	5627.08	10037.5	6654.92	5821.19	5698.26	6084.47	4947.86	6593.63
ENSG00000065029	ZNF76	0.538247	0.0392434	0.116703	2602.73	2312.6	1682.54	4747.79	2488.19	2044.9	1714.79	2184.52	2231.9	2547.74
ENSG00000065054	SLC9A3R2	0.654186	0.0342057	0.105275	2496.93	1685.01	1794.14	2847.58	2141.6	921.932	1491.45	3621.78	1763.54	2614.98
ENSG00000065057	NTHL1	0.851087	3.64816e-10	1.16383e-08	362.901	339.293	309.897	651.889	582.424	335.651	283.034	569.993	298.284	403.385
ENSG00000065060	UHRF1BP1	-0.0700795	0.603052	0.757694	308.942	305.988	312.472	336.4	340.862	364.876	358.214	255.452	317.908	315.081
ENSG00000065135	GNAI3	-0.0222192	0.828302	0.90569	1486.52	1333.23	1421.58	1565.62	1257.46	1464.82	1489.24	1347.26	1446.94	1241.26
ENSG00000065150	IPO5	0.688277	1.20907e-06	1.85785e-05	2402.76	2266.81	2286.88	4276.83	3615.81	2760.48	2735.25	3636.32	2399.36	1843.33
ENSG00000065154	OAT	-0.393566	1.73082e-05	0.000192411	1983.79	2276.17	2015.62	1538.35	1767.32	2434.57	2178.03	1644.53	2144.25	2138.34
ENSG00000065183	WDR3	-0.647097	1.98371e-20	2.25307e-18	1058.02	1026.2	1057.6	660.981	732.327	1091.97	1079.07	639.083	1047.92	1061.64
ENSG00000065243	PKN2	-0.166953	0.237261	0.421415	1271.74	1447.72	1057.6	1167.4	1187.76	1280.61	1185.2	939.08	1340.97	1047.6
ENSG00000065268	WDR18	-0.155092	0.567577	0.7307	1457.95	2176.26	1006.95	1467.43	1230.73	1143.34	1061.38	1113.62	1870.82	1189.08
ENSG00000065308	TRAM2	0.759392	0.0127048	0.048845	462.354	282.05	377.714	682.801	543.278	286.056	558.328	937.262	372.855	643.208
ENSG00000065320	NTN1	-1.37768	0.124745	0.270898	66.6552	93.6697	20.6026	23.6389	21.9603	118.673	30.9568	88.1808	448.735	33.1137
ENSG00000065357	DGKA	0.285108	0.148064	0.304473	194.676	194.625	221.478	299.123	256.84	216.092	176.896	266.361	306.134	266.916
ENSG00000065361	ERBB3	-1.22838	0.213127	0.39245	26.4505	12.4893	12.0182	15.4562	27.689	71.7354	12.1616	23.6361	221.097	10.0344
ENSG00000065413	ANKRD44	-0.175811	0.666552	0.802241	32.7986	22.897	49.7895	41.8227	46.7849	44.2811	28.7456	29.0906	66.7215	65.2239
ENSG00000065427	KARS	-0.19445	0.13623	0.288207	2260.99	2312.6	2452.56	2123.87	2277.18	2943.81	3096.79	2527.24	2752.59	2680.2
ENSG00000065457	ADAT1	-0.348018	0.0634881	0.167086	318.464	259.153	335.65	240.026	242.518	429.527	392.488	318.178	321.833	320.099
ENSG00000065485	PDIA5	-2.01823	1.30015e-06	1.97846e-05	376.655	441.289	545.968	172.746	42.0109	759.863	477.619	183.634	749.636	416.429
ENSG00000065491	TBC1D22B	0.181839	0.231544	0.414788	391.467	400.698	397.458	573.698	424.883	394.987	361.531	376.359	450.043	433.488
ENSG00000065518	NDUFB4	0.466479	0.0206816	0.0716128	1994.37	2533.25	2836.29	2204.78	4034.01	2350.44	2480.97	3649.96	2002.95	2498.58
ENSG00000065526	SPEN	0.0186203	0.890597	0.941693	1760.54	1325.95	1152.03	1466.52	1357.72	1454.19	1448.34	1419.07	1305.65	1328.56
ENSG00000065534	MYLK	1.09969	0.11096	0.249269	595.665	279.968	448.106	2107.5	694.135	111.588	427.867	1243.62	506.298	2034.98
ENSG00000065548	ZC3H15	0.328559	0.0152446	0.056398	958.565	1271.83	1212.98	1310.14	1456.06	1326.66	1279.18	1667.25	1098.94	1087.73
ENSG00000065559	MAP2K4	-0.132984	0.447992	0.636698	1251.64	1291.6	1135.72	1241.04	1035	991.011	969.611	759.082	986.432	1138.91
ENSG00000065600	TMEM206	0.241425	0.183995	0.354853	120.614	163.402	119.323	159.108	147.038	107.16	140.411	159.998	115.127	154.53
ENSG00000065609	SNAP91	0.025302	0.801055	0.888929	2061.02	2249.11	2152.97	2385.71	2262.86	2109.55	2189.09	1819.07	1971.56	2093.18
ENSG00000065613	SLK	0.928605	0.000176471	0.00143438	1020.99	830.538	909.947	1250.14	2434.73	840.455	1395.27	2258.16	1214.07	1075.69
ENSG00000065615	CYB5R4	0.0924484	0.546145	0.714183	234.88	267.479	264.4	267.302	219.603	200.151	221.12	260.906	251.187	198.682
ENSG00000065618	COL17A1	1.54056	0.00144873	0.00834535	10.5802	7.28542	6.86752	45.4595	21.0055	22.1405	14.3728	42.7268	14.3909	12.0413
ENSG00000065621	GSTO2	0.811196	9.37282e-06	0.000112343	1187.1	1238.52	1212.98	2249.33	2098.64	1095.51	1139.87	1482.71	781.034	1095.76
ENSG00000065665	SEC61A2	-0.152494	0.446865	0.635638	407.337	505.817	364.837	453.685	356.138	504.804	328.363	295.451	363.698	390.34
ENSG00000065675	PRKCQ	0.896741	0.290702	0.482856	20.1024	14.5708	7.72596	182.747	31.5082	57.5654	22.112	32.7269	91.5785	96.3306
ENSG00000065717	TLE2	0.658776	0.0776875	0.193405	1159.59	1232.28	1276.5	3039.42	910.874	1336.4	706.478	1104.53	782.342	976.351
ENSG00000065802	ASB1	0.22198	0.103312	0.236216	1723.51	1392.56	1698.85	1788.38	2055.67	1628.66	1496.98	1516.35	1478.34	1302.47
ENSG00000065809	FAM107B	0.390688	0.0468449	0.133235	1724.57	1777.64	2579.61	2934.86	2354.52	1649.03	2018.83	2096.34	1420.78	1971.77
ENSG00000065833	ME1	-0.670552	0.00115656	0.00694892	1089.76	1043.9	1095.37	985.561	509.86	1243.41	1316.77	718.173	1029.6	1402.81
ENSG00000065882	TBC1D1	0.561707	0.0850386	0.206321	584.027	646.321	946.001	1323.78	1610.74	592.481	1207.32	1302.71	1292.57	1430.91
ENSG00000065883	CDK13	0.0901458	0.414526	0.605241	965.972	1033.49	1140.01	1156.49	1184.9	1144.22	1126.61	1001.81	918.402	994.413
ENSG00000065911	MTHFD2	1.80452	1.6852e-06	2.50376e-05	266.621	170.687	328.783	931.919	1317.62	189.523	267.555	361.814	192.315	328.126
ENSG00000065923	SLC9A7	-0.101946	0.684341	0.813921	1431.5	1489.35	1510.85	1664.73	1107.56	1247.84	833.622	834.536	1382.84	1135.9
ENSG00000065970	FOXJ2	0.187818	0.383657	0.576877	669.726	575.548	594.899	473.688	790.57	621.706	768.392	790.9	461.817	516.774
ENSG00000065978	YBX1	0.261597	0.427682	0.618131	1737.27	1788.05	2977.07	2526.64	1803.61	1696.85	2327.29	4295.4	2523.64	3738.83
ENSG00000065989	PDE4A	-0.107478	0.753088	0.858276	210.546	190.462	125.332	134.56	177.592	97.4184	134.883	159.998	137.368	290.999
ENSG00000066027	PPP2R5A	0.66181	0.0381442	0.114362	154.471	161.32	286.719	224.57	338.952	238.232	242.126	539.085	227.638	315.081
ENSG00000066032	CTNNA2	0.369314	0.236522	0.420658	475.051	420.473	425.786	1107.39	500.312	549.971	472.091	409.086	655.441	645.215
ENSG00000066044	ELAVL1	0.233544	0.103597	0.236524	1408.22	1189.61	1722.89	1648.36	1886.67	1538.33	1698.2	1664.53	1265.09	1493.12
ENSG00000066056	TIE1	-0.788557	0.2707	0.460411	624.231	425.677	315.906	135.469	67.7904	93.8759	407.966	649.992	423.878	1147.94
ENSG00000066084	DIP2B	0.454881	0.0063868	0.02834	1067.54	1084.49	1065.32	1634.72	1834.16	1452.42	1424.01	1370.89	989.048	1153.96
ENSG00000066117	SMARCD1	0.143837	0.470821	0.654105	1351.09	1423.78	1094.51	1732.01	1159.12	1276.18	1028.21	1045.44	940.642	1198.11
ENSG00000066135	KDM4A	0.491123	0.00528029	0.024229	1403.99	1207.3	1203.53	2033.86	1541.99	1183.19	1228.32	1332.71	994.281	927.182
ENSG00000066136	NFYC	0.107407	0.55533	0.721209	960.681	1266.62	950.293	1223.77	1080.83	1063.63	1156.46	980.898	699.922	1016.49
ENSG00000066185	ZMYND12	-0.24348	0.275144	0.465838	105.802	121.771	157.095	79.0995	136.536	118.673	139.306	117.271	122.977	152.523
ENSG00000066230	SLC9A3	-0.802144	0.144011	0.298569	389.351	285.172	90.9947	194.567	113.621	146.128	72.9696	72.7264	209.322	356.223
ENSG00000066248	NGEF	-2.24292	0.00511876	0.0235733	43.3788	80.1397	53.2233	2.72757	1.90959	106.275	77.392	37.2723	81.1124	22.0758
ENSG00000066279	ASPM	0.464123	0.573147	0.73491	33.8566	4.1631	17.1688	42.7319	2.86438	15.9412	11.056	13.6362	7.84959	10.0344
ENSG00000066294	CD84	0.291627	0.615852	0.767485	50.7849	49.9572	91.8531	50.0054	53.4685	60.2223	49.752	211.816	146.526	152.523
ENSG00000066322	ELOVL1	0.192854	0.400499	0.591726	688.77	624.465	570.004	709.168	590.063	492.406	385.854	745.446	575.637	836.872
ENSG00000066336	SPI1	0.280363	0.542508	0.711099	197.85	199.829	457.549	174.564	238.699	189.523	184.635	598.175	257.728	455.564
ENSG00000066379	ZNRD1	0.206972	0.258124	0.445787	111.092	99.9144	128.766	120.013	162.315	134.615	148.15	157.271	128.21	137.472
ENSG00000066382	MPPED2	-5.03522	1.09791e-17	9.49537e-16	895.084	863.843	271.267	12.7287	17.1863	1432.94	395.805	28.1815	316.6	269.926
ENSG00000066422	ZBTB11	0.250309	0.087704	0.21053	357.61	367.394	358.828	413.681	477.397	380.817	415.706	374.541	307.442	293.006
ENSG00000066427	ATXN3	0.00898449	0.931741	0.964563	551.228	513.102	497.895	589.155	554.735	527.831	519.632	456.358	549.471	552.898
ENSG00000066455	GOLGA5	0.170932	0.23297	0.416344	608.361	624.465	837.838	790.995	680.768	720.01	720.851	830.899	576.945	680.335
ENSG00000066468	FGFR2	-1.91336	0.00621172	0.027687	217.952	411.106	149.369	4.54595	53.4685	127.53	208.958	93.6353	147.834	70.2411
ENSG00000066557	LRRC40	0.444743	0.0267108	0.0869333	169.283	243.541	195.724	300.942	312.218	275.428	276.4	282.724	180.541	193.665
ENSG00000066583	ISOC1	-0.90282	0.00104055	0.0063738	1363.79	1044.94	1259.33	671.891	996.805	1483.42	2490.92	869.99	1440.4	1992.84
ENSG00000066629	EML1	-0.45987	0.00110862	0.00672303	924.709	786.826	946.001	740.989	586.244	911.305	835.833	573.63	978.582	718.466
ENSG00000066651	TRMT11	-0.318964	0.0574495	0.155046	350.204	372.597	328.783	297.305	303.625	392.33	494.203	340.905	465.742	341.171
ENSG00000066654	THUMPD1	0.0902317	0.644876	0.787802	1152.18	1303.05	1039.57	1086.48	1575.41	1262.9	1364.31	988.17	936.718	940.227
ENSG00000066697	MSANTD3	0.10846	0.474694	0.657258	277.201	312.232	323.632	336.4	311.263	276.314	350.475	291.815	242.029	249.858
ENSG00000066735	KIF26A	-2.92711	8.30723e-07	1.32061e-05	352.32	1465.41	733.108	73.6443	31.5082	1459.5	621.347	209.998	434.344	527.812
ENSG00000066739	ATG2B	-0.0530126	0.712371	0.83314	1066.48	1013.71	1084.21	1179.22	1012.08	964.442	1205.1	800.9	994.281	915.141
ENSG00000066777	ARFGEF1	-0.204344	0.193186	0.367268	1492.87	1228.11	1220.7	1101.03	1245.05	1662.31	1560	1256.35	1445.63	1075.69
ENSG00000066813	ACSM2B	-6.54892	6.29243e-06	7.89863e-05	27.5085	36.4271	10.3013	0	0	7.9706	15.4784	0	2.61653	11.0379
ENSG00000066827	ZFAT	0.436304	0.0124149	0.0480806	283.549	241.46	228.345	370.04	308.399	201.036	247.654	259.088	188.39	225.775
ENSG00000066855	MTFR1	0.253491	0.162196	0.325439	139.659	139.464	164.821	192.748	181.411	188.637	199.008	239.088	197.548	172.592
ENSG00000066923	STAG3	-0.254468	0.264318	0.453373	270.853	233.134	174.263	288.213	176.637	269.229	288.562	179.089	286.51	271.933
ENSG00000066926	FECH	1.05842	3.1204e-10	1.00913e-08	989.248	808.682	1015.53	2222.97	1962.1	1038.83	1260.38	1870.89	756.177	914.138
ENSG00000066933	MYO9A	1.0611	3.23468e-08	7.05865e-07	514.197	407.984	448.106	1383.79	798.208	518.974	508.576	837.263	503.682	475.632
ENSG00000067048	DDX3Y	-5.92176	1.47139e-05	0.000166716	2390.07	2253.28	1992.44	40.9135	36.2822	25.683	3.3168	4.5454	2458.23	2438.37
ENSG00000067057	PFKP	-0.580519	0.141096	0.294663	2137.2	2934.99	1816.46	612.794	2633.32	2396.49	2367.09	1041.81	1372.37	1935.64
ENSG00000067064	IDI1	0.456898	0.0117448	0.0461134	785.05	1121.96	1247.31	1436.52	1264.15	901.563	1159.77	1552.71	1176.13	839.883
ENSG00000067066	SP100	-1.5402	0.00831037	0.035123	288.839	896.107	766.587	65.4616	75.4287	696.099	464.352	420.904	370.239	330.133
ENSG00000067082	KLF6	-0.258023	0.649888	0.791639	362.901	223.767	580.306	227.297	129.852	159.412	288.562	666.356	421.261	819.814
ENSG00000067113	PLPP1	-0.532364	0.1064	0.241375	1233.65	907.556	1222.42	520.056	629.209	465.837	861.262	899.08	796.733	1424.89
ENSG00000067141	NEO1	-0.853775	0.000803561	0.00515668	1994.37	2850.68	2104.9	832.817	1048.36	1749.99	2231.1	1484.53	1972.86	1289.43
ENSG00000067167	TRAM1	-0.0941653	0.654594	0.794343	1339.45	1455	1582.11	1124.67	1547.72	1686.22	1932.59	2051.79	2102.38	1670.73
ENSG00000067177	PHKA1	-0.0281224	0.908817	0.951789	1389.18	963.757	1097.94	1704.73	824.942	1036.18	1121.08	875.444	1109.41	1384.75
ENSG00000067182	TNFRSF1A	-0.362015	0.512913	0.688461	745.904	833.661	687.611	111.83	326.54	811.23	348.264	1101.81	402.946	788.707
ENSG00000067191	CACNB1	-0.903112	0.00214556	0.0115744	648.566	880.496	624.944	371.858	290.257	658.903	459.93	274.542	503.682	310.064
ENSG00000067208	EVI5	0.270142	0.162267	0.325502	293.071	253.949	421.494	487.325	428.703	405.615	360.426	349.087	349.307	362.243
ENSG00000067221	STOML1	-0.545626	0.0172803	0.0622354	1489.69	1991	952.869	1008.29	850.722	1316.92	1063.59	893.626	1428.63	1133.89
ENSG00000067225	PKM	-0.178397	0.0598084	0.15997	24680.4	27547.2	24765.1	22007.8	22259.1	28037	22276.7	21554.3	23115.7	23371.2
ENSG00000067248	DHX29	0.0384663	0.711149	0.832382	800.921	721.257	758.003	860.093	848.812	822.743	824.777	715.446	862.147	720.473
ENSG00000067334	DNTTIP2	-0.0236328	0.834925	0.909758	779.76	788.907	877.326	740.08	942.382	898.02	965.189	834.536	846.447	812.79
ENSG00000067365	METTL22	0.383365	0.0937613	0.220724	252.867	293.499	214.61	406.408	275.936	164.726	228.859	238.179	235.488	257.885
ENSG00000067369	TP53BP1	-0.431629	0.0141317	0.0531179	3935.83	3759.28	3499	3259.44	2680.11	5057.79	3273.68	2388.15	3069.19	3610.39
ENSG00000067445	TRO	-1.23911	4.36273e-05	0.000429844	2547.71	3047.39	1503.99	856.456	964.342	1903.2	1484.82	615.447	1749.15	1182.06
ENSG00000067533	RRP15	0.173244	0.53154	0.702436	329.044	266.438	212.035	331.854	319.856	456.981	321.73	375.45	353.232	186.641
ENSG00000067560	RHOA	0.294274	0.0267883	0.0871555	6520.57	5809.61	8213.56	8299.99	8129.12	7770.45	7729.25	9998.07	7029.31	7210.75
ENSG00000067596	DHX8	0.526806	0.00310399	0.0157192	801.979	667.137	679.885	1355.6	894.642	772.262	629.086	802.718	730.012	664.28
ENSG00000067601	PMS2P4	0.594164	0.0020777	0.0112793	170.341	146.749	193.149	281.849	248.246	189.523	226.648	251.815	130.826	149.513
ENSG00000067606	PRKCZ	0.660154	0.000281012	0.00215374	587.201	539.121	503.904	1091.03	883.185	596.909	688.789	710.901	610.96	439.508
ENSG00000067646	ZFY	-7.47047	2.66079e-08	5.90194e-07	339.624	346.578	361.403	1.81838	0.954794	3.54249	1.1056	0.90908	223.713	249.858
ENSG00000067704	IARS2	-0.356539	0.0079166	0.0338227	2309.66	2465.6	1752.08	1660.18	1554.4	1796.93	2054.2	1527.25	1937.54	1852.36
ENSG00000067715	SYT1	-0.58524	0.367843	0.561882	2966.69	913.8	2744.43	126.377	2622.82	1613.6	3520.23	1630.89	2019.96	1554.33
ENSG00000067798	NAV3	0.445984	0.538949	0.708179	57.133	96.7921	278.993	633.705	126.033	294.026	122.722	41.8177	238.104	284.978
ENSG00000067829	IDH3G	0.0839023	0.535217	0.705071	1953.1	1432.11	1572.66	1968.39	1592.6	1475.45	1477.08	1499.07	1617.02	1613.54
ENSG00000067836	ROGDI	0.982802	9.60861e-06	0.000115023	4238.42	3565.69	3353.07	9871.98	5464.29	3176.73	2684.4	5683.57	4123.65	3676.62
ENSG00000067840	PDZD4	-0.498723	0.171056	0.337666	2522.32	2266.81	1574.38	2823.03	1049.32	1780.99	1827.56	1085.44	3633.05	2742.41
ENSG00000067842	ATP2B3	-2.47464	0.000239261	0.00186329	336.45	470.43	69.5337	29.0941	58.2424	172.696	114.982	15.4544	79.8042	88.3031
ENSG00000067900	ROCK1	-0.12335	0.457848	0.644824	1281.26	868.006	1173.49	1285.59	928.06	1120.31	1321.19	1041.81	1338.35	1174.03
ENSG00000067955	CBFB	2.2401	4.03095e-30	9.74353e-28	260.273	343.456	458.407	1992.03	1834.16	410.929	419.022	1676.34	338.841	484.663
ENSG00000067992	PDK3	0.0437925	0.851641	0.919758	147.065	139.464	151.944	192.748	115.53	210.778	138.2	151.816	122.977	129.444
ENSG00000068001	HYAL2	0.14048	0.616244	0.767567	1577.51	1190.65	1116.83	1617.45	759.061	1002.52	1026	1648.16	974.657	1631.6
ENSG00000068024	HDAC4	0.820335	0.00590501	0.0265331	293.071	258.112	359.686	893.733	401.968	286.941	340.525	324.542	281.277	321.102
ENSG00000068028	RASSF1	0.279142	0.219094	0.399343	306.826	230.011	304.746	252.755	287.393	195.722	235.493	427.268	274.736	313.075
ENSG00000068078	FGFR3	3.8818	0.00340597	0.0169525	69.8293	48.9164	26.6116	5979.74	47.7397	61.9935	38.696	859.99	783.651	61.2101
ENSG00000068079	IFI35	0.512012	0.0720626	0.182986	189.385	237.297	260.107	183.656	317.946	208.121	263.133	509.994	257.728	239.823
ENSG00000068097	HEATR6	-0.449622	5.80935e-05	0.000549571	613.651	694.197	618.935	460.05	511.77	707.612	698.739	447.268	554.704	630.163
ENSG00000068120	COASY	0.229819	0.121587	0.2656	1785.94	1755.79	1497.12	2114.77	1736.77	1327.55	1378.68	1652.71	1792.32	1417.87
ENSG00000068137	PLEKHH3	1.695	9.59459e-11	3.34993e-09	1186.04	721.257	1051.59	3747.68	3057.25	736.837	1291.34	2600.88	630.584	1159.98
ENSG00000068305	MEF2A	-0.384391	0.0450815	0.129885	1142.66	1133.4	1394.97	1186.49	700.819	1109.68	1284.71	785.445	928.868	1144.93
ENSG00000068308	OTUD5	0.296203	0.0057414	0.0259588	2503.27	2303.23	2403.63	3420.37	2681.06	2590.44	2653.44	3019.96	2203.12	2674.18
ENSG00000068323	TFE3	0.497316	0.000815549	0.0052194	1498.16	1320.74	1673.1	1981.12	1891.45	1538.33	1533.47	2450.88	1177.44	1707.86
ENSG00000068354	TBC1D25	0.176989	0.186135	0.357672	658.088	579.712	618.935	580.063	658.808	582.739	552.8	679.083	467.051	495.701
ENSG00000068366	ACSL4	-1.05898	2.57106e-10	8.40117e-09	1524.61	1979.55	1637.9	596.428	919.467	1496.7	1387.53	818.172	1781.86	1538.28
ENSG00000068383	INPP5A	0.236417	0.216662	0.397099	515.255	513.102	711.647	750.081	715.141	655.36	600.341	846.354	688.147	894.069
ENSG00000068394	GPKOW	0.20471	0.024423	0.0811116	767.064	691.074	742.551	847.364	870.772	809.458	699.845	799.991	727.395	658.259
ENSG00000068400	GRIPAP1	0.308466	0.0643179	0.168471	3190.99	2985.98	2613.95	4197.73	3124.09	2826.02	2331.71	2748.15	2282.92	2740.41
ENSG00000068438	FTSJ1	0.010282	0.927336	0.961663	423.208	410.065	422.353	464.596	404.833	453.438	395.805	460.904	491.908	487.674
ENSG00000068489	PRR11	0.272133	0.582416	0.742183	17.9863	15.6116	39.4882	28.1849	14.3219	22.1405	14.3728	45.454	24.857	35.1205
ENSG00000068615	REEP1	0.150947	0.740493	0.850933	810.443	1186.48	349.385	1339.24	587.198	596.023	414.6	356.359	584.794	855.938
ENSG00000068650	ATP11A	0.268855	0.401035	0.592239	430.614	295.58	335.65	697.348	361.867	292.255	305.146	324.542	412.103	609.091
ENSG00000068654	POLR1A	0.151018	0.419949	0.61084	909.897	920.045	651.556	1170.13	743.785	887.393	804.877	791.809	684.223	827.841
ENSG00000068697	LAPTM4A	-0.0468481	0.829468	0.906455	4711.36	6809.79	5228.76	3654.94	5443.28	5747.69	5242.75	7231.73	6704.86	4916.88
ENSG00000068724	TTC7A	-0.42691	0.0850938	0.206375	644.334	568.263	947.718	587.336	387.646	693.442	417.917	447.268	588.719	599.056
ENSG00000068745	IP6K2	-0.133058	0.521694	0.69525	3549.65	4305.69	3175.37	3349.45	3607.21	3702.78	2907.73	2502.7	2403.28	4157.27
ENSG00000068784	SRBD1	-0.545641	0.00112532	0.00680895	392.525	432.962	401.75	322.762	209.1	405.615	379.221	256.361	363.698	309.061
ENSG00000068796	KIF2A	-0.403214	0.0984877	0.22854	588.259	521.428	536.525	653.707	405.788	744.808	856.84	356.359	588.719	532.829
ENSG00000068831	RASGRP2	-0.315967	0.68741	0.815516	242.286	117.608	115.889	106.375	38.1918	23.9118	75.1808	250.906	90.2703	483.66
ENSG00000068878	PSME4	0.407702	0.0238972	0.0799144	779.76	570.345	689.327	1178.31	1002.53	660.674	824.777	800.9	884.387	837.876
ENSG00000068885	IFT80	0.258288	0.329715	0.523138	573.446	396.535	739.975	1016.47	783.886	588.938	912.12	625.447	815.049	707.428
ENSG00000068903	SIRT2	-0.0295018	0.85008	0.918792	1609.25	1482.06	1303.11	1375.6	1429.33	1461.28	1105.6	1250.89	1109.41	1585.44
ENSG00000068912	ERLEC1	-0.0946967	0.517954	0.692785	2340.34	2977.66	2823.41	2367.53	2928.35	3153.7	2898.88	2796.33	3493.07	2477.5
ENSG00000068971	PPP2R5B	0.417122	0.0775029	0.19303	1302.42	1083.45	1315.13	2158.42	1439.83	1236.33	1211.74	1004.53	866.071	1026.52
ENSG00000068976	PYGM	0.128035	0.863897	0.92581	71.9453	50.998	134.775	50.9146	21.9603	28.3399	53.0688	205.452	43.1727	211.727
ENSG00000069011	PITX1	-0.112532	0.661925	0.799176	14708.6	20092.2	20297	27358.4	14134.8	24937.3	21733.9	12815.3	16853.1	18377.1
ENSG00000069018	TRPC7	-6.01804	4.98156e-55	5.52484e-52	568.156	497.49	645.547	7.27351	15.2767	540.229	441.134	2.72724	714.313	385.323
ENSG00000069020	MAST4	0.442171	0.122539	0.267271	578.736	705.645	1212.12	1130.12	1656.57	1373.6	1300.19	1465.44	972.041	1158.98
ENSG00000069122	ADGRF5	-1.35566	0.0394699	0.117192	1092.93	630.71	481.585	167.291	100.253	115.131	487.57	532.721	523.306	1447.97
ENSG00000069188	SDK2	1.43374	0.0200555	0.0698939	154.471	72.8542	128.766	34.5492	561.419	100.075	77.392	259.088	68.0298	136.468
ENSG00000069248	NUP133	-0.217091	0.165123	0.329477	1116.21	1247.89	891.919	935.556	943.337	1145.11	1074.64	791.809	944.567	822.824
ENSG00000069275	NUCKS1	-0.0281994	0.875682	0.932405	9334.9	7927.58	10459.2	8397.27	10782.5	11556.5	12125.1	9420.8	9177.48	7469.64
ENSG00000069329	VPS35	-0.17725	0.133515	0.284165	2895.8	2891.27	2954.75	3091.24	2731.67	3352.08	3604.26	2424.52	3213.1	2849.78
ENSG00000069345	DNAJA2	-0.425552	0.000496049	0.00344222	2763.55	2802.81	2583.9	1904.75	1889.54	2658.64	2665.6	1940.89	1946.7	2547.74
ENSG00000069399	BCL3	-0.0308212	0.94625	0.971836	193.618	142.586	168.254	63.6433	108.847	149.67	133.778	347.269	219.788	231.796
ENSG00000069424	KCNAB2	-0.0335911	0.919943	0.957871	864.402	748.317	755.427	1078.3	689.361	995.439	703.161	413.632	371.547	769.642
ENSG00000069431	ABCC9	-0.78701	0.299991	0.492514	112.15	183.176	92.7115	43.6411	45.8301	71.7354	119.405	270.906	228.946	643.208
ENSG00000069482	GAL	0.572943	0.174491	0.342373	316.348	183.176	433.512	514.601	434.431	216.092	706.478	568.175	181.849	342.174
ENSG00000069493	CLEC2D	-0.633034	0.357876	0.552387	53.959	89.5066	27.4701	24.5481	8.59315	13.2843	29.8512	60.9084	44.481	82.2824
ENSG00000069509	FUNDC1	0.192351	0.31552	0.508199	386.177	390.291	460.124	425.501	579.56	539.344	595.918	579.084	389.863	471.619
ENSG00000069535	MAOB	-1.48882	3.06023e-14	1.81439e-12	5895.28	7034.6	4863.92	2022.04	2157.83	6892.79	5906.11	1829.07	4852.35	3904.4
ENSG00000069667	RORA	0.594644	0.00676418	0.0296586	236.996	240.419	233.496	550.06	348.5	373.732	278.611	374.541	277.352	326.119
ENSG00000069696	DRD4	1.00345	0.000761974	0.00493008	56.075	41.631	52.3648	110.921	94.5246	24.7974	64.1248	81.8172	52.3306	44.1515
ENSG00000069702	TGFBR3	3.92542	7.51795e-34	2.40243e-31	238.054	107.2	116.748	2171.14	2867.25	143.471	131.566	2668.15	155.684	290.999
ENSG00000069849	ATP1B3	-0.149059	0.519839	0.694076	673.958	643.199	1025.84	943.739	612.023	708.497	966.294	796.354	1135.57	934.206
ENSG00000069869	NEDD4	0.0650203	0.922931	0.959375	55.017	75.9766	95.2869	13.6378	122.214	83.2484	58.5968	192.725	136.06	228.785
ENSG00000069943	PIGB	-0.0231375	0.916063	0.955559	252.867	298.702	295.303	311.852	274.026	282.513	269.766	270.906	430.419	204.703
ENSG00000069956	MAPK6	0.827802	6.242e-05	0.000582896	631.637	393.413	781.181	1087.39	1109.47	650.932	634.614	944.534	489.291	545.874
ENSG00000069966	GNB5	-0.171504	0.36825	0.562248	2816.45	2309.48	3038.88	2071.13	3139.36	3244.03	3092.36	2073.61	2280.31	2357.09
ENSG00000069974	RAB27A	-0.663175	0.0170931	0.0616791	503.617	430.881	642.113	320.944	304.579	640.305	781.659	547.266	849.064	487.674
ENSG00000069998	HDHD5	0.0138945	0.95247	0.97507	599.897	702.523	485.877	654.616	392.42	471.151	402.438	485.449	401.637	477.639
ENSG00000070010	UFD1	0.24047	0.0124192	0.0480806	973.378	949.187	1107.39	1291.05	1172.49	988.354	955.238	1126.35	979.89	1133.89
ENSG00000070018	LRP6	-0.469217	0.013976	0.0526902	1380.72	852.395	901.362	840.091	653.079	1103.48	901.064	658.174	983.815	826.838
ENSG00000070047	PHRF1	0.567878	2.3847e-05	0.000255751	1618.77	1441.47	1546.91	2821.21	1841.8	1478.99	1548.95	2114.52	1474.41	1559.35
ENSG00000070061	ELP1	-0.149383	0.0989686	0.229349	2792.11	2739.32	2559.87	2397.53	2608.5	3089.05	2631.33	2299.97	2511.87	2578.85
ENSG00000070081	NUCB2	-0.346944	0.221344	0.402548	2120.27	2519.72	3417.45	2665.74	2555.03	3261.74	2729.73	2721.79	5773.37	3750.87
ENSG00000070087	PFN2	0.292057	0.204905	0.382187	2047.27	2360.48	3572.83	2623.01	4155.26	3703.67	3232.77	3793.59	2539.34	2688.23
ENSG00000070159	PTPN3	-1.6	1.4019e-05	0.00015961	988.19	463.145	1260.19	358.221	299.805	710.269	1440.6	449.995	1225.84	1750.01
ENSG00000070182	SPTB	-0.59142	0.00328997	0.0164752	3058.73	3116.08	2299.76	2301.16	1775.92	3322.85	2570.52	1373.62	2659.7	2135.33
ENSG00000070190	DAPP1	-0.161129	0.864037	0.92581	7.40613	11.4485	3.43376	20.0022	13.3671	12.3987	3.3168	19.9998	77.1876	25.0861
ENSG00000070214	SLC44A1	-0.0574352	0.772655	0.872001	680.306	750.399	576.013	670.073	569.057	732.409	696.528	839.99	999.514	617.118
ENSG00000070269	TMEM260	0.714606	0.000265547	0.00204435	503.617	644.24	411.193	854.638	870.772	437.497	497.52	628.174	485.366	368.264
ENSG00000070366	SMG6	0.0726897	0.704954	0.828526	1429.38	1421.7	1014.68	1451.98	1084.65	1288.58	1226.11	1189.08	871.304	1013.48
ENSG00000070367	EXOC5	0.551305	0.00105154	0.00643088	869.692	734.787	891.919	1491.98	1206.86	961.785	1140.98	1157.26	756.177	783.69
ENSG00000070371	CLTCL1	1.39614	2.86543e-06	3.98412e-05	378.771	499.572	318.481	1395.61	880.32	232.033	319.518	669.992	504.99	360.236
ENSG00000070388	FGF22	0.375755	0.444062	0.633309	40.2047	31.2232	12.0182	32.7308	44.8753	15.0556	30.9568	27.2724	44.481	16.0551
ENSG00000070404	FSTL3	-0.50511	0.141186	0.294722	688.77	778.5	322.773	391.861	334.178	313.51	299.618	302.724	438.269	565.942
ENSG00000070413	DGCR2	0.100084	0.577669	0.738786	5701.67	6598.51	4528.27	6612.53	5641.88	5038.3	4686.64	4241.77	4958.32	4400.1
ENSG00000070423	RNF126	0.399655	0.000344769	0.00255113	1150.07	971.043	1079.06	1443.79	1416.91	1005.18	1112.23	1299.08	877.846	1158.98
ENSG00000070444	MNT	0.701515	0.000102774	0.000895429	707.815	556.815	607.776	1000.11	993.941	675.729	808.193	1196.35	472.284	747.566
ENSG00000070476	ZXDC	-0.186271	0.397658	0.589422	878.156	941.901	772.596	760.991	815.394	813.886	800.454	468.176	559.937	659.263
ENSG00000070495	JMJD6	0.537902	0.0107803	0.0431532	544.88	491.246	473.001	462.777	873.637	547.314	522.949	795.445	461.817	384.319
ENSG00000070501	POLB	0.0397648	0.798537	0.887504	252.867	244.582	344.235	300.032	316.037	309.082	336.102	279.997	291.743	253.871
ENSG00000070526	ST6GALNAC1	0.202642	0.843163	0.914461	4.23208	3.12232	4.2922	2.72757	0	1.77124	3.3168	7.27264	321.833	1.00344
ENSG00000070540	WIPI1	0.325371	0.228361	0.411161	100.512	137.382	136.492	217.296	169.953	209.007	139.306	220.907	192.315	217.747
ENSG00000070601	FRMPD1	1.13598	0.0163346	0.0595431	133.31	212.318	269.55	803.723	1066.51	340.964	368.165	289.088	607.035	362.243
ENSG00000070610	GBA2	0.054149	0.784507	0.879324	3478.77	3607.33	2732.42	3887.69	2718.3	2450.52	2912.15	2521.79	2277.69	3054.48
ENSG00000070614	NDST1	-0.700911	0.0485411	0.136739	2057.85	1709.99	1257.61	1457.43	390.511	1257.58	1196.26	848.172	1136.88	1610.53
ENSG00000070669	ASNS	0.0467418	0.796348	0.886523	836.893	1099.06	812.943	1223.77	797.253	930.788	887.797	759.991	921.018	794.728
ENSG00000070718	AP3M2	-0.219208	0.110173	0.247898	1032.63	1219.79	1092.79	1110.12	1024.49	1125.63	1385.32	825.445	1038.76	1144.93
ENSG00000070729	CNGB1	-1.35617	0.24892	0.435882	519.487	514.143	32.6207	364.585	5.72877	45.1667	78.4976	8.18172	926.252	145.499
ENSG00000070731	ST6GALNAC2	0.0271622	0.976692	0.987177	133.31	131.138	69.5337	16.3654	5.72877	27.4543	140.411	280.906	154.375	38.1309
ENSG00000070756	PABPC1	-0.095393	0.643835	0.78691	3875.52	4085.04	5557.54	4672.32	4053.1	5203.03	5665.09	6073.57	5731.51	6774.25
ENSG00000070759	TESK2	-1.87909	6.43537e-21	7.58328e-19	759.658	706.686	505.621	184.565	207.19	670.416	735.224	131.817	578.253	536.843
ENSG00000070761	CFAP20	-0.26911	0.0329999	0.102484	1691.77	1502.88	1734.91	1243.77	1506.67	1502.01	1671.67	1259.08	1338.35	1828.28
ENSG00000070770	CSNK2A2	0.0944006	0.398246	0.589969	1232.59	1181.28	1066.18	1184.67	1119.97	979.498	1105.6	1191.8	922.327	1152.96
ENSG00000070778	PTPN21	0.120588	0.414687	0.605382	324.812	260.194	339.084	372.768	319.856	306.425	351.581	384.541	336.224	394.354
ENSG00000070785	EIF2B3	-0.413517	0.00869942	0.0365054	663.378	691.074	656.707	532.785	408.652	742.151	556.117	466.358	546.855	516.774
ENSG00000070808	CAMK2A	-3.96469	2.7749e-07	4.90788e-06	65.5972	269.561	351.96	48.187	26.7342	1022.89	210.064	39.0905	448.735	1785.13
ENSG00000070814	TCOF1	-0.418668	0.0772772	0.192697	1483.34	1388.39	1275.64	1545.62	678.859	1533.9	1313.45	829.99	1203.6	1328.56
ENSG00000070831	CDC42	0.193934	0.289526	0.48158	2246.17	2360.48	3535.91	3120.34	3461.13	3424.7	3534.6	3925.41	3086.2	3243.13
ENSG00000070882	OSBPL3	2.11839	0.000149088	0.00123339	102.628	42.6718	126.191	688.256	557.6	40.7386	97.2928	371.814	166.15	294.009
ENSG00000070886	EPHA8	-3.78786	1.58226e-11	6.40172e-10	111.092	368.434	74.6843	10.0011	10.5027	92.9903	152.573	10.909	130.826	82.2824
ENSG00000070950	RAD18	0.0635449	0.774992	0.873065	123.788	104.077	97.8622	106.375	130.807	98.304	137.094	97.2716	73.2628	111.382
ENSG00000070961	ATP2B1	-0.426899	0.1255	0.272069	4014.12	4852.09	2516.95	2655.74	2582.72	5684.81	3321.22	3322.69	4050.39	2415.29
ENSG00000071051	NCK2	-0.603735	0.101293	0.232871	870.75	1138.61	1244.74	934.647	359.003	1652.57	1240.48	1349.98	1300.42	1926.61
ENSG00000071054	MAP4K4	0.458422	0.0434573	0.126305	1598.67	1206.26	1300.54	1831.11	1713.86	1628.66	1301.29	2629.97	1270.33	2179.48
ENSG00000071073	MGAT4A	0.684345	0.000167871	0.00136955	720.511	660.892	607.776	1083.75	1105.65	456.095	588.179	946.353	835.981	687.359
ENSG00000071082	RPL31	0.158512	0.455735	0.643168	7676.99	12115.7	9405.07	6820.74	11752.6	9105.96	9463.93	12062.6	7873.14	8403.84
ENSG00000071127	WDR1	-0.191899	0.248702	0.435692	3233.31	2877.74	2851.74	2276.61	2398.44	2566.53	2641.28	3148.15	2811.46	3869.28
ENSG00000071189	SNX13	0.0739079	0.567233	0.730307	771.296	993.94	767.445	1011.02	816.349	895.364	845.784	831.808	747.019	872.996
ENSG00000071205	ARHGAP10	1.96545	0.00170888	0.00958051	133.31	72.8542	82.4103	480.052	320.811	15.0556	90.6592	428.177	64.105	275.947
ENSG00000071242	RPS6KA2	-1.88135	3.03035e-06	4.16734e-05	816.791	575.548	522.79	98.1924	114.575	363.105	587.074	291.815	469.667	1003.44
ENSG00000071243	ING3	0.355059	0.155812	0.316425	151.297	182.136	242.939	161.836	277.845	196.608	244.338	314.542	168.766	188.647
ENSG00000071246	VASH1	-1.28956	6.39393e-08	1.31894e-06	1283.38	1059.51	1404.41	503.691	538.504	1081.34	1282.5	640.902	1283.41	2205.57
ENSG00000071282	LMCD1	-1.351	0.0303473	0.0963138	254.983	394.454	309.897	51.8238	29.5986	326.794	126.038	296.36	527.231	310.064
ENSG00000071462	BUD23	0.236284	0.0483179	0.136294	1931.94	1940	2189.02	2248.43	2684.88	2461.14	2100.64	2763.6	2441.22	2182.49
ENSG00000071537	SEL1L	-0.105564	0.538866	0.708177	2008.12	2396.9	1489.39	1737.46	1617.42	1764.16	1557.79	1725.43	2014.73	1525.23
ENSG00000071539	TRIP13	1.48728	0.044718	0.129015	29.6245	18.7339	24.0363	146.379	65.8808	11.5131	9.9504	32.7269	94.1951	17.0585
ENSG00000071553	ATP6AP1	-0.0337289	0.727221	0.842336	7418.83	8670.7	6834.04	7511.72	6988.14	7029.18	6806.07	7369	7628.49	7849.94
ENSG00000071564	TCF3	-0.149562	0.642861	0.786143	664.436	521.428	1236.15	809.179	832.581	921.932	1331.14	831.808	562.554	1162.99
ENSG00000071575	TRIB2	-0.742029	0.0160457	0.0588115	1122.56	835.742	753.71	760.082	326.54	775.805	1474.87	649.083	749.636	1062.65
ENSG00000071626	DAZAP1	0.510096	0.000301521	0.00228472	2158.36	1794.3	1696.28	3186.71	2391.76	1672.94	1746.85	2378.15	1853.81	2115.26
ENSG00000071655	MBD3	0.423242	1.39413e-05	0.000158918	2306.48	2056.57	2467.16	3228.53	3092.58	2022.76	2469.91	2926.33	2298.62	2470.48
ENSG00000071794	HLTF	-0.0648089	0.721295	0.838428	1493.92	1552.84	1245.6	1643.81	1365.36	1205.33	1796.6	1064.53	1415.54	1234.24
ENSG00000071859	FAM50A	0.211211	0.0461984	0.131913	2313.89	2274.09	1971.84	2428.44	2353.57	1864.23	1781.12	2339.97	1993.8	2156.4
ENSG00000071889	FAM3A	0.496691	1.30475e-05	0.00015009	1250.58	1068.88	1220.7	1583.81	1677.57	1105.26	1134.35	1868.16	1401.15	1305.48
ENSG00000071894	CPSF1	-0.232713	0.476754	0.658562	4709.24	5234.06	2866.33	5018.73	1792.15	3204.18	2702.09	3021.78	3550.63	4693.11
ENSG00000071909	MYO3B	-4.18306	1.84872e-15	1.25833e-13	928.941	514.143	592.324	35.4584	37.237	855.511	715.323	29.0906	614.884	92.3169
ENSG00000071967	CYBRD1	0.517028	NA	NA	204.198	247.704	290.153	40.9135	58.2424	299.34	179.107	1385.44	362.389	837.876
ENSG00000071994	PDCD2	-0.0550686	0.691481	0.818867	664.436	823.253	841.271	645.524	824.942	837.798	904.381	801.809	699.922	734.521
ENSG00000072042	RDH11	0.187248	0.213031	0.392311	1089.76	1500.8	1357.19	1338.33	1339.58	1138.91	1346.62	1649.98	1384.14	1053.62
ENSG00000072062	PRKACA	0.0294433	0.875021	0.931912	3951.7	4519.04	4268.16	3890.42	4185.82	5584.73	4146	4729.94	2879.49	3924.47
ENSG00000072071	ADGRL1	0.234934	0.0579318	0.156147	4168.6	4196.4	3197.69	4996.9	4675.63	3852.45	4358.27	4030.86	3605.58	3792.02
ENSG00000072110	ACTN1	-1.78378	3.73578e-05	0.000376453	2785.76	4066.31	2862.9	927.373	302.67	2737.46	1463.81	1219.99	1699.44	4068.97
ENSG00000072121	ZFYVE26	-0.0380185	0.837114	0.910781	922.593	676.504	608.634	680.983	775.293	627.906	799.349	563.63	603.11	601.063
ENSG00000072133	RPS6KA6	0.11773	0.500638	0.677986	733.207	584.915	660.14	556.424	760.971	677.501	794.926	809.081	593.952	527.812
ENSG00000072134	EPN2	0.125694	0.550445	0.717412	1032.63	951.268	812.943	1308.32	779.112	806.801	970.717	745.446	756.177	728.5
ENSG00000072135	PTPN18	0.294722	0.0314331	0.0987734	963.855	772.255	1093.65	1101.94	1104.7	776.69	784.976	1083.62	948.492	918.151
ENSG00000072163	LIMS2	-0.0558174	0.932747	0.964896	502.559	181.095	267.833	152.744	86.8863	53.1373	197.902	524.539	184.465	466.601
ENSG00000072182	ASIC4	-3.38433	6.13578e-10	1.86587e-08	4891.22	1504.96	2653.44	129.105	664.537	3453.92	3755.72	98.1807	3336.08	2129.31
ENSG00000072195	SPEG	-0.3166	0.351842	0.546247	6294.16	6163.47	7403.19	8868.23	4879	5404.06	5167.57	2521.79	9509.78	7335.18
ENSG00000072201	LNX1	0.414826	0.0849003	0.206065	274.027	184.217	251.523	332.763	250.156	278.971	201.219	317.269	245.954	139.479
ENSG00000072210	ALDH3A2	-0.291532	0.0504493	0.140519	1833.55	2103.41	1988.15	1752.01	1389.23	1897	1561.11	1341.8	1933.62	1486.1
ENSG00000072274	TFRC	-0.364357	0.271405	0.461121	511.023	912.76	388.873	390.042	506.041	967.985	592.602	554.539	613.576	370.271
ENSG00000072310	SREBF1	1.65779	1.19575e-06	1.84248e-05	10460.6	14448	14736.8	62785.9	26254	13576.6	9153.26	21169.8	11328.3	7794.75
ENSG00000072364	AFF4	-0.124845	0.351465	0.545933	2898.97	2460.39	2456.86	2512.09	2493.92	3190.01	2944.21	2297.25	2258.07	2370.13
ENSG00000072401	UBE2D1	-0.0168017	0.946399	0.971836	173.515	192.543	330.499	310.943	266.388	303.768	343.842	233.634	296.976	272.937
ENSG00000072415	MPP5	-0.0467552	0.818176	0.899969	531.126	467.308	573.438	534.603	549.961	599.566	759.547	529.994	584.794	376.292
ENSG00000072422	RHOBTB1	-1.36826	NA	NA	191.501	240.419	230.92	40.0043	39.1466	196.608	322.835	198.18	230.255	258.889
ENSG00000072501	SMC1A	0.0928887	0.593685	0.75108	1328.87	1384.23	1182.93	1779.28	1119.02	1381.57	1509.14	1252.71	1058.39	1236.24
ENSG00000072506	HSD17B10	0.263801	0.048998	0.137574	1542.59	1376.95	1578.67	1559.26	1842.75	1630.43	1502.51	1961.8	1169.59	1618.56
ENSG00000072518	MARK2	0.193494	0.0140069	0.0527753	1536.24	1389.43	1452.48	1590.17	1831.3	1488.73	1384.21	1592.71	1437.78	1539.28
ENSG00000072571	HMMR	-0.45467	0.412431	0.603022	28.5665	17.6932	19.7441	19.093	7.63835	29.2255	6.6336	14.5453	10.4661	19.0654
ENSG00000072609	CHFR	0.16495	0.317371	0.509947	778.702	722.298	600.05	983.743	756.197	611.079	697.633	634.538	745.711	788.707
ENSG00000072657	TRHDE	-3.51733	0.0194616	0.0682278	4.23208	117.608	1.71688	0.909189	3.81918	1.77124	19.9008	0.90908	3.92479	1.00344
ENSG00000072682	P4HA2	-1.69014	0.000429185	0.00304778	3603.61	6230.08	5265.67	3193.07	961.478	2170.66	5205.16	689.992	7366.84	6635.78
ENSG00000072736	NFATC3	-0.478293	0.0445989	0.128814	556.518	412.147	381.147	410.044	242.518	500.376	506.365	291.815	416.028	298.023
ENSG00000072756	TRNT1	-0.0125264	0.943113	0.970068	290.955	314.314	300.454	306.397	297.896	300.226	427.867	310.905	265.578	254.875
ENSG00000072778	ACADVL	0.620681	0.0158976	0.0583593	14595.4	15837.5	10158.8	28407.6	14806	11752.2	9573.39	19039.8	17539.9	15015.5
ENSG00000072786	STK10	-0.0846486	0.730712	0.844636	468.703	372.597	372.563	474.597	259.704	318.824	309.568	396.359	409.487	546.877
ENSG00000072803	FBXW11	-0.0830448	0.492994	0.671113	2063.14	2055.53	2333.24	2334.8	1837.02	2315.9	2419.05	1929.07	1980.71	1909.55
ENSG00000072818	ACAP1	0.240492	0.213194	0.392535	828.429	1059.51	746.843	683.71	1148.62	735.952	749.597	999.988	741.786	731.511
ENSG00000072832	CRMP1	0.406738	0.0403635	0.119281	4543.13	4480.54	4665.62	6547.98	6034.3	4704.42	4661.21	4268.13	2867.72	3732.81
ENSG00000072840	EVC	0.308949	0.736157	0.848069	65.5972	58.2834	20.6026	6.36433	12.4123	27.4543	19.9008	186.361	78.4959	116.4
ENSG00000072849	DERL2	0.60057	1.48989e-06	2.23294e-05	520.545	606.772	651.556	919.19	1010.17	635.876	654.515	965.443	773.185	615.111
ENSG00000072858	SIDT1	-1.11775	8.26112e-06	0.000100487	1025.22	859.68	938.275	477.324	658.808	1013.15	935.337	264.542	1083.24	1236.24
ENSG00000072864	NDE1	-0.0725955	0.817798	0.899683	62.4231	71.8135	102.154	74.5535	82.1123	85.0197	116.088	109.999	70.6463	145.499
ENSG00000072952	MRVI1	-1.22056	0.0822259	0.201229	268.737	107.2	244.655	85.4638	52.5137	52.2517	238.81	213.634	202.781	797.738
ENSG00000072954	TMEM38A	1.47035	0.000724803	0.00471547	281.433	219.603	241.222	1611.08	299.805	439.268	277.506	682.719	391.171	334.147
ENSG00000072958	AP1M1	0.141224	0.3933	0.58531	1078.12	1188.56	1161.47	1411.06	1239.32	1228.36	1128.82	1062.71	791.5	1275.38
ENSG00000073008	PVR	-0.56814	0.0348543	0.106708	1010.41	1284.32	660.999	647.343	452.572	749.236	712.006	544.539	557.321	714.452
ENSG00000073050	XRCC1	0.212239	0.107694	0.243461	1282.32	1239.56	1317.71	1802.01	1275.61	1205.33	1543.42	1543.62	1318.73	1402.81
ENSG00000073060	SCARB1	-0.839837	1.75467e-06	2.5947e-05	703.583	698.36	509.055	405.498	335.133	645.618	493.098	278.179	576.945	628.156
ENSG00000073111	MCM2	-0.188518	0.488909	0.66777	814.675	668.177	388.873	650.07	500.312	615.507	541.744	356.359	417.336	559.922
ENSG00000073146	MOV10L1	-0.959079	0.209666	0.387972	33.8566	11.4485	3.43376	4.54595	5.72877	6.19935	7.7392	9.0908	10.4661	15.0517
ENSG00000073150	PANX2	-0.439199	0.0810278	0.199178	212.662	268.52	222.336	117.285	205.281	177.124	180.213	150.907	277.352	160.551
ENSG00000073169	SELENOO	0.327547	0.0119732	0.0468153	734.265	722.298	729.674	1007.38	898.461	636.762	614.714	744.537	798.042	694.383
ENSG00000073282	TP63	1.50646	NA	NA	6.34812	0	2.57532	0.909189	0	0.885622	5.528	47.2722	173.999	19.0654
ENSG00000073331	ALPK1	-1.94124	0.00671078	0.0294724	47.6109	75.9766	200.875	18.1838	14.3219	41.6242	110.56	76.3627	311.367	188.647
ENSG00000073350	LLGL2	1.02134	0.000255997	0.0019781	556.518	567.222	766.587	1541.99	1348.17	619.935	456.613	611.811	563.862	493.694
ENSG00000073417	PDE8A	0.988783	1.05848e-05	0.000125365	479.283	451.696	355.394	1300.14	692.226	456.095	483.147	869.99	559.937	581.998
ENSG00000073464	CLCN4	-0.0878159	0.578153	0.738968	1550	1874.44	1525.45	1398.33	1698.58	1595.89	1668.35	1317.26	1579.08	1152.96
ENSG00000073536	NLE1	-0.490593	0.0134862	0.0512742	156.587	205.033	159.67	124.559	119.349	240.889	147.045	136.362	167.458	168.579
ENSG00000073578	SDHA	0.0769104	0.6004	0.75581	2382.66	3052.59	2197.61	2490.27	2246.63	2353.1	2576.05	2876.33	2042.2	2237.68
ENSG00000073584	SMARCE1	-0.120415	0.35166	0.54601	1214.61	1324.91	1427.59	1064.66	1327.16	1402.82	1431.75	1217.26	1047.92	1299.46
ENSG00000073605	GSDMB	-2.38012	1.74987e-11	7.01958e-10	274.027	207.114	151.944	41.8227	40.1014	190.409	147.045	55.4539	366.314	334.147
ENSG00000073614	KDM5A	0.00558782	0.967574	0.982424	954.333	811.804	687.611	785.54	880.32	840.455	828.094	816.354	952.417	698.397
ENSG00000073670	ADAM11	0.268891	0.575154	0.736482	380.887	362.19	157.095	477.324	237.744	136.386	162.523	108.181	208.014	187.644
ENSG00000073711	PPP2R3A	-0.233298	0.459081	0.645548	107.918	132.178	200.875	206.386	93.5698	219.634	172.474	119.999	183.157	135.465
ENSG00000073712	FERMT2	0.251841	0.306276	0.498855	466.586	480.838	448.964	777.357	556.645	437.497	549.483	629.993	587.411	879.017
ENSG00000073737	DHRS9	-3.70508	0.000499169	0.00345751	12.6962	78.0581	492.745	12.7287	21.0055	58.451	44.224	8.18172	573.02	16.0551
ENSG00000073756	PTGS2	-5.43092	6.71379e-35	2.34052e-32	473.993	394.454	534.808	16.3654	7.63835	271.886	962.977	12.7271	661.982	406.395
ENSG00000073792	IGF2BP2	0.0834315	0.873762	0.931466	424.266	179.013	392.307	630.977	266.388	252.402	161.418	89.9989	442.194	323.109
ENSG00000073803	MAP3K13	0.250088	0.25387	0.441271	721.569	650.484	1218.13	991.016	1190.63	1103.48	1060.27	1072.71	835.981	792.721
ENSG00000073849	ST6GAL1	-0.717388	0.00460395	0.0216845	249.693	341.374	448.106	241.844	290.257	468.494	385.854	235.452	595.261	456.567
ENSG00000073910	FRY	-1.01681	3.13107e-07	5.49145e-06	3077.78	2824.66	2474.02	1751.1	1164.85	3354.74	2434.53	1062.71	2226.67	2391.21
ENSG00000073921	PICALM	-0.21398	0.17872	0.34783	1832.49	1642.34	2303.19	1704.73	1588.78	1856.26	2098.43	1759.98	1556.84	2384.18
ENSG00000073969	NSF	0.647276	0.000368628	0.00268863	1386.01	1586.14	1868.82	3123.07	2455.73	2057.3	1636.29	2069.07	1494.04	1362.68
ENSG00000074047	GLI2	-2.42876	0.00105816	0.00645648	24.3344	75.9766	114.173	8.1827	1.90959	86.7909	111.666	41.8177	82.4207	157.541
ENSG00000074054	CLASP1	0.216795	0.319192	0.511608	1978.5	2140.87	1625.89	2603.92	2294.37	2356.64	1860.72	1779.98	1225.84	2217.61
ENSG00000074071	MRPS34	0.322211	7.66077e-05	0.000694738	1555.29	1677.73	1665.37	1812.01	2178.84	1491.39	1563.32	1951.8	1577.77	1558.35
ENSG00000074181	NOTCH3	-1.22392	0.1406	0.294135	3772.9	1616.32	1761.52	671.891	458.301	609.308	2260.95	3652.68	2640.08	13407
ENSG00000074201	CLNS1A	-0.179457	0.255904	0.443212	1460.07	1573.65	1801.01	1219.22	1756.82	1912.94	2019.93	1519.98	1597.39	1513.19
ENSG00000074211	PPP2R2C	0.282693	0.247255	0.434233	1211.43	1202.09	951.152	1903.84	1098.97	1327.55	1035.95	916.353	893.545	895.072
ENSG00000074219	TEAD2	-0.230725	0.773325	0.87219	120.614	89.5066	97.0037	26.3665	17.1863	32.768	97.2928	265.451	115.127	294.009
ENSG00000074266	EED	0.00336075	0.984843	0.991027	476.109	529.754	478.151	409.135	540.414	420.67	511.893	402.723	371.547	358.23
ENSG00000074276	CDHR2	-0.625204	0.0210781	0.0726255	93.1057	83.262	67.8168	48.187	38.1918	87.6766	53.0688	53.6357	60.1802	58.1998
ENSG00000074317	SNCB	-2.15448	6.04565e-14	3.42297e-12	2051.5	3265.95	2958.18	489.144	509.86	2684.32	2389.2	623.629	1127.72	2377.16
ENSG00000074319	TSG101	-0.161031	0.149599	0.306614	1730.92	1895.25	2081.72	1544.71	1794.06	2078.55	2044.25	1738.16	1654.96	1754.02
ENSG00000074356	NCBP3	-0.050013	0.570157	0.732745	1051.67	917.963	1079.06	1016.47	952.885	1010.49	1146.51	1016.35	987.74	1018.5
ENSG00000074370	ATP2A3	-0.886509	0.173001	0.340335	335.392	216.481	624.086	243.663	58.2424	130.186	315.096	452.722	736.553	898.082
ENSG00000074410	CA12	-4.4762	1.17332e-09	3.39291e-08	176.689	1146.93	666.15	23.6389	14.3219	1149.54	80.7088	41.8177	709.08	215.74
ENSG00000074416	MGLL	2.47324	2.91147e-06	4.03921e-05	459.18	284.132	293.587	4077.71	2650.51	242.66	299.618	1739.07	709.08	1270.36
ENSG00000074527	NTN4	-0.175219	0.784833	0.879375	152.355	152.994	106.447	44.5503	46.7849	239.118	68.5472	345.451	167.458	263.906
ENSG00000074582	BCS1L	-0.0176621	0.91498	0.954942	772.354	833.661	567.429	765.537	617.752	666.873	591.496	615.447	575.637	713.449
ENSG00000074590	NUAK1	1.13399	0.00428597	0.0204939	332.218	267.479	311.614	259.119	1234.55	231.147	337.208	584.539	298.284	431.481
ENSG00000074603	DPP8	0.123512	0.208365	0.38659	907.78	774.336	856.723	943.739	980.574	866.138	892.219	821.809	812.432	770.645
ENSG00000074621	SLC24A1	0.0790439	0.654885	0.794646	238.054	271.642	187.998	250.936	239.653	267.458	174.685	221.816	213.247	219.754
ENSG00000074657	ZNF532	-0.137717	0.519978	0.694107	1435.73	1124.04	1016.39	1189.22	879.365	1125.63	875.635	1020.9	858.222	1494.13
ENSG00000074660	SCARF1	0.793302	0.0998794	0.230804	302.593	186.299	244.655	492.781	363.777	109.817	196.797	584.539	219.788	680.335
ENSG00000074695	LMAN1	0.0213839	0.916231	0.955617	1537.3	1419.62	1506.56	1694.73	1478.02	1456.85	1520.2	1777.25	2517.1	1426.9
ENSG00000074696	HACD3	0.221517	0.0967732	0.225645	3699.89	4787.56	3756.53	4616.86	4351.95	4017.18	3439.52	4408.13	3933.95	3135.76
ENSG00000074706	IPCEF1	-0.154253	0.607816	0.760983	195.734	314.314	429.22	309.124	278.8	462.295	348.264	371.814	495.832	246.847
ENSG00000074755	ZZEF1	-0.0422607	0.865916	0.926864	3194.16	2398.99	1851.66	3350.36	2033.71	2076.78	2492.02	1650.89	2819.31	2072.11
ENSG00000074800	ENO1	0.115014	0.512355	0.688004	6585.11	8562.45	6124.97	6229.77	7360.51	8087.5	6755.22	8890.81	5369.12	6949.85
ENSG00000074803	SLC12A1	-2.33467	0.000527974	0.00361322	325.87	262.275	270.409	111.83	15.2767	147.899	205.642	9.0908	86.3455	305.047
ENSG00000074842	MYDGF	0.0331785	0.878252	0.933929	2477.88	2553.02	2072.27	2160.23	2310.6	2291.1	1817.61	3226.33	3152.92	3188.95
ENSG00000074855	ANO8	0.0949842	0.76399	0.866446	774.47	839.905	544.251	1131.03	452.572	618.164	535.11	555.448	484.058	877.01
ENSG00000074935	TUBE1	-0.881238	3.16539e-07	5.5362e-06	477.167	495.409	516.781	224.57	329.404	492.406	536.216	243.634	540.313	369.267
ENSG00000074964	ARHGEF10L	-0.319876	0.107356	0.242785	935.289	1014.76	749.418	951.921	669.311	888.279	777.237	674.538	1105.48	1218.18
ENSG00000074966	TXK	-1.27319	0.0114335	0.0452327	10.5802	17.6932	12.0182	7.27351	5.72877	13.2843	21.0064	5.45448	10.4661	19.0654
ENSG00000075035	WSCD2	-1.04196	0.117332	0.259189	290.955	1115.71	585.456	540.058	184.275	666.873	489.781	40.9086	321.833	205.706
ENSG00000075043	KCNQ2	-0.987288	0.175508	0.343725	1572.22	2148.16	470.425	1203.77	120.304	2037.82	623.558	361.814	702.538	243.837
ENSG00000075089	ACTR6	0.202339	0.128681	0.2768	710.989	773.296	772.596	749.172	830.671	805.916	595.918	907.262	762.718	621.132
ENSG00000075131	TIPIN	0.585003	0.00245508	0.012955	124.846	83.262	115.889	153.653	158.496	116.016	98.3984	149.089	100.736	77.2652
ENSG00000075142	SRI	-0.237077	0.166787	0.331929	1889.62	2310.52	2403.63	1877.48	1778.78	2979.23	2503.08	2139.07	1984.64	1864.4
ENSG00000075151	EIF4G3	-0.447867	0.0190721	0.0670995	3511.57	3230.57	3341.05	3379.46	1901	3337.91	3857.44	2096.34	2744.74	3454.86
ENSG00000075188	NUP37	0.11712	0.592187	0.749808	166.109	139.464	200.017	159.108	255.885	171.811	200.114	193.634	243.337	189.651
ENSG00000075213	SEMA3A	3.83532	4.57023e-07	7.66612e-06	21.1604	14.5708	26.6116	239.117	227.241	0.885622	24.3232	642.72	70.6463	24.0827
ENSG00000075218	GTSE1	0.160692	0.747721	0.855173	57.133	26.0194	37.7714	63.6433	27.689	33.6536	23.2176	23.6361	14.3909	47.1619
ENSG00000075223	SEMA3C	0.479423	0.638708	0.784002	37.0307	86.3843	26.6116	200.022	12.4123	7.08497	5.528	69.9992	192.315	118.406
ENSG00000075234	TTC38	0.372586	0.080327	0.197946	508.907	530.795	544.251	560.061	530.866	518.089	411.283	890.899	414.72	642.204
ENSG00000075239	ACAT1	0.448593	5.41225e-05	0.00051772	1244.23	1473.74	1269.63	1580.17	1793.1	1391.31	1135.45	1827.25	1198.37	1176.04
ENSG00000075240	GRAMD4	0.769646	4.34578e-05	0.000428757	585.085	472.512	439.521	1070.12	713.231	414.471	424.55	740.9	569.095	551.894
ENSG00000075275	CELSR1	0.776271	0.148148	0.304567	45.4948	19.7747	20.6026	68.1892	45.8301	95.6472	42.0128	129.089	743.094	50.1722
ENSG00000075290	WNT8B	-2.81882	0.000717966	0.00467583	14.8123	14.5708	17.1688	0	6.68356	23.9118	43.1184	1.81816	7.84959	17.0585
ENSG00000075292	ZNF638	-0.0390344	0.745359	0.853715	2873.58	3183.73	2565.02	2805.76	2661.01	2908.38	2626.91	2465.43	2611.3	2246.71
ENSG00000075303	SLC25A40	-1.1354	1.27251e-06	1.9421e-05	443.31	512.061	661.857	295.487	213.874	449.896	672.205	212.725	597.877	365.254
ENSG00000075336	TIMM21	0.183553	0.281097	0.472522	378.771	620.302	486.736	488.235	554.735	435.726	395.805	554.539	507.607	457.57
ENSG00000075340	ADD2	-0.435981	0.313548	0.506225	1410.34	458.982	1236.15	924.646	718.96	910.419	1215.05	380.905	767.951	391.343
ENSG00000075391	RASAL2	-0.587436	1.81929e-07	3.36284e-06	1004.06	888.822	1024.98	720.078	543.278	935.217	923.176	637.265	877.846	1008.46
ENSG00000075399	VPS9D1	0.413092	0.0556782	0.151393	1648.39	1508.08	1067.04	2320.25	1539.13	1150.42	1080.17	1323.62	1293.87	1335.58
ENSG00000075407	ZNF37A	0.266906	0.0239492	0.0800293	661.262	661.933	805.217	877.368	953.839	767.834	716.429	797.263	824.207	660.266
ENSG00000075413	MARK3	0.191591	0.0796664	0.196807	1486.52	1798.46	1612.15	2083.86	1843.71	1682.68	1582.11	1582.71	1514.97	1579.42
ENSG00000075415	SLC25A3	0.266359	0.00426722	0.020425	5698.49	6539.19	6722.44	7293.52	7718.56	6233.01	6730.89	7397.19	5374.35	6169.17
ENSG00000075420	FNDC3B	-0.246452	0.290364	0.482569	628.463	569.304	649.839	575.517	314.127	742.151	603.658	731.81	613.576	681.339
ENSG00000075426	FOSL2	3.55825	1.25665e-14	7.84535e-13	336.45	119.689	214.61	4241.37	2138.74	153.213	145.939	2509.06	242.029	548.884
ENSG00000075539	FRYL	-0.419117	0.00318784	0.0160705	1369.08	1130.28	1141.73	952.83	983.438	1267.32	1325.61	806.354	1364.52	960.296
ENSG00000075568	TMEM131	-0.0400726	0.801065	0.888929	1228.36	1302.01	1059.32	1453.79	1024.49	1242.53	1215.05	934.535	1023.06	1116.83
ENSG00000075618	FSCN1	-0.909914	0.00671848	0.0294925	1246.35	1391.52	998.366	1031.93	428.703	2390.29	1314.56	937.262	1235	1936.65
ENSG00000075624	ACTB	0.211781	0.266782	0.456213	23272.2	24129.3	29124.3	28372.2	32808.6	25289.8	28002.6	32419.6	20514.9	38247.3
ENSG00000075643	MOCOS	-2.03807	0.0504004	0.140424	9.52217	5.20387	12.0182	4.54595	0.954794	2.65687	17.6896	8.18172	73.2628	12.0413
ENSG00000075651	PLD1	-3.02528	5.01807e-11	1.85511e-09	780.818	676.504	565.712	55.4605	22.9151	622.592	720.851	138.18	414.72	335.15
ENSG00000075673	ATP12A	-8.00074	9.33192e-07	1.47357e-05	12.6962	7.28542	22.3194	0	0	8.85622	87.3424	0	156.992	10.0344
ENSG00000075702	WDR62	-1.246	0.0716888	0.182429	123.788	81.1804	149.369	159.108	27.689	184.209	54.1744	17.2725	316.6	220.758
ENSG00000075711	DLG1	0.204763	0.233087	0.416474	1883.27	1698.54	2219.93	2984.87	2116.78	2047.56	2475.44	1996.34	1839.42	2205.57
ENSG00000075785	RAB7A	0.179529	0.0962534	0.224905	6246.55	6859.75	6828.03	7182.6	8231.28	6599.65	7390.93	7325.37	5604.61	7316.11
ENSG00000075790	BCAP29	-0.0376935	0.738953	0.849992	684.538	618.22	716.798	682.801	658.808	670.416	719.745	749.991	818.974	784.693
ENSG00000075826	SEC31B	-0.829607	0.0224038	0.0760975	1521.43	1406.09	749.418	1004.65	407.697	781.118	742.963	499.085	1146.04	1580.42
ENSG00000075856	SART3	0.107252	0.47027	0.653965	2514.91	2482.25	2067.98	2761.21	2360.25	2200.77	2164.76	1926.34	1859.04	1975.78
ENSG00000075884	ARHGAP15	-1.07198	0.0876291	0.210439	35.9727	35.3863	67.8168	15.4562	19.0959	17.7124	29.8512	42.7268	64.105	128.441
ENSG00000075914	EXOSC7	-0.479448	4.32201e-07	7.28213e-06	1296.07	1110.51	1120.26	819.18	950.02	1245.18	1192.94	780.9	1177.44	1151.95
ENSG00000075945	KIFAP3	-0.0148748	0.894574	0.943846	2274.74	2274.09	2281.73	2227.51	2106.28	2556.79	2463.28	2662.7	2586.44	2060.07
ENSG00000075975	MKRN2	0.415585	0.0761371	0.190585	625.289	593.242	739.117	1218.31	918.512	964.442	633.509	623.629	660.674	611.097
ENSG00000076003	MCM6	-0.128523	0.719862	0.837433	330.102	355.945	205.167	398.225	147.038	448.125	181.318	266.361	269.503	279.961
ENSG00000076043	REXO2	-1.26549	2.94154e-06	4.06896e-05	566.04	539.121	525.365	224.57	191.914	840.455	823.672	342.723	446.118	517.777
ENSG00000076053	RBM7	0.0605907	0.794626	0.885296	198.908	202.951	153.661	121.831	212.919	178.01	207.853	249.088	201.473	164.565
ENSG00000076067	RBMS2	-0.254218	0.468845	0.6529	334.334	191.503	357.97	217.296	193.823	304.654	237.704	407.268	302.209	548.884
ENSG00000076108	BAZ2A	0.0215538	0.888311	0.940089	3983.44	3329.44	2853.46	4035.89	3208.11	3413.19	3441.73	2860.88	2774.83	3431.78
ENSG00000076201	PTPN23	-0.202628	0.254023	0.441414	3798.29	2774.71	2917.84	3143.07	2460.5	2900.41	2823.7	2045.43	2344.41	2978.22
ENSG00000076242	MLH1	0.396935	0.000646832	0.00427908	684.538	826.375	828.395	1173.76	964.342	853.739	763.969	943.625	713.004	787.704
ENSG00000076248	UNG	0.371587	0.0313933	0.0987159	542.764	591.16	443.814	622.795	712.276	576.54	470.986	580.902	463.126	366.257
ENSG00000076258	FMO4	0.879957	0.248494	0.435565	6.34812	12.4893	12.0182	3.63676	11.4575	7.08497	15.4784	55.4539	18.3157	18.062
ENSG00000076321	KLHL20	0.38632	0.0121298	0.0472122	264.505	238.337	291.87	383.678	430.612	292.255	338.314	327.269	278.66	333.143
ENSG00000076344	RGS11	-1.01372	0.0152467	0.056398	5939.72	5167.45	2395.91	3000.32	1930.59	2842.85	2834.76	724.537	3128.06	4335.88
ENSG00000076351	SLC46A1	0.145287	0.353382	0.547782	334.334	421.514	433.512	429.137	526.092	417.128	391.382	347.269	389.863	358.23
ENSG00000076356	PLXNA2	-1.43987	0.0134709	0.0512676	292.013	567.222	230.062	84.5546	43.9205	107.16	193.48	228.179	299.593	568.953
ENSG00000076382	SPAG5	0.946852	0.0109314	0.0435913	253.925	158.198	169.971	414.59	367.596	149.67	99.504	189.998	100.736	243.837
ENSG00000076513	ANKRD13A	-0.113381	0.518174	0.692982	951.159	983.532	844.705	645.524	845.948	737.723	738.541	726.355	722.162	619.125
ENSG00000076554	TPD52	0.437121	0.0120207	0.0469523	1673.79	2281.38	2193.31	2661.2	2831.92	2617.9	2559.46	3182.69	1789.71	1834.3
ENSG00000076555	ACACB	0.406646	0.00181082	0.0100652	1261.16	1073.04	1040.43	1501.98	1797.88	1150.42	1164.2	1260.89	1084.55	1253.3
ENSG00000076604	TRAF4	1.06692	0.000154544	0.00127239	403.105	260.194	275.559	685.529	934.744	286.941	244.338	506.358	446.118	453.557
ENSG00000076641	PAG1	-0.788203	0.0868273	0.20909	185.153	292.458	181.131	163.654	230.105	152.327	249.866	69.0901	255.112	548.884
ENSG00000076650	GPATCH1	0.486146	0.00142156	0.00822149	313.174	220.644	333.933	429.137	415.335	288.713	338.314	388.177	268.194	288.992
ENSG00000076685	NT5C2	0.216771	0.330182	0.523438	770.238	692.115	776.888	1409.24	892.733	1109.68	1050.32	815.445	898.778	961.299
ENSG00000076706	MCAM	-0.733602	0.331581	0.52474	2011.29	877.373	1365.78	890.096	258.749	370.19	1227.22	2223.61	1176.13	6056.79
ENSG00000076716	GPC4	-3.53529	3.69314e-11	1.40205e-09	1048.5	521.428	1521.16	47.2778	51.5589	1074.26	1638.5	249.997	1848.58	1787.13
ENSG00000076770	MBNL3	0.220027	0.692557	0.819403	616.825	440.248	689.327	759.173	724.689	960.9	985.089	670.901	69.338	553.901
ENSG00000076826	CAMSAP3	0.417402	0.562067	0.726213	1562.69	1715.2	958.878	4385.02	235.834	2095.38	812.616	389.086	829.44	778.673
ENSG00000076864	RAP1GAP	-1.21775	1.89479e-05	0.000208184	2420.75	1747.46	2183.87	611.884	1213.54	2127.26	2220.04	871.808	1159.12	2776.53
ENSG00000076924	XAB2	-0.290492	0.0324424	0.101111	2598.5	2965.17	2079.14	2302.98	1774.01	2341.58	2365.98	1899.07	2347.03	2359.1
ENSG00000076928	ARHGEF1	0.209673	0.434808	0.624742	1970.03	1518.49	1224.99	2362.07	1318.57	1071.6	1161.99	1456.35	1416.85	2001.87
ENSG00000076944	STXBP2	-2.16461	2.32053e-07	4.19476e-06	639.044	814.927	616.36	216.387	67.7904	669.53	212.275	129.998	711.696	670.301
ENSG00000076984	MAP2K7	0.0852763	0.522028	0.69535	2282.15	2479.13	1904.02	2274.79	1943.96	2069.7	2030.99	2329.06	1736.07	1898.52
ENSG00000077009	NMRK2	-0.86433	0.334554	0.527618	9.52217	24.9786	22.3194	23.6389	0.954794	12.3987	16.584	1.81816	5.23306	21.0723
ENSG00000077044	DGKD	-0.398542	0.245887	0.432559	476.109	354.904	291.011	407.317	284.529	276.314	365.954	251.815	355.848	782.686
ENSG00000077063	CTTNBP2	-3.01984	2.03989e-12	9.42647e-11	248.635	470.43	432.654	65.4616	13.3671	241.775	458.824	64.5447	451.351	413.419
ENSG00000077080	ACTL6B	-0.142813	0.505634	0.682017	1096.11	1573.65	1241.3	1244.68	961.478	1189.39	1108.92	876.353	879.154	850.921
ENSG00000077092	RARB	0.289438	0.486014	0.665725	163.993	217.522	162.245	272.757	143.219	263.915	60.808	285.451	264.269	206.709
ENSG00000077097	TOP2B	-0.523415	0.00339319	0.0168979	4080.78	4467.01	4354.87	3326.72	2769.86	5448.35	5118.93	2989.06	3922.18	3078.57
ENSG00000077147	TM9SF3	-0.0532281	0.702256	0.826539	3065.08	3886.25	3019.13	3461.28	2764.13	3315.77	3333.38	3019.06	3200.02	2562.8
ENSG00000077150	NFKB2	0.663808	0.153427	0.312861	135.426	182.136	136.492	217.296	217.693	176.239	135.989	540.903	210.631	460.581
ENSG00000077152	UBE2T	-0.832141	0.0205838	0.0713264	147.065	118.648	146.793	147.289	50.6041	177.124	201.219	54.5448	125.593	132.455
ENSG00000077157	PPP1R12B	-1.20749	1.29258e-10	4.41493e-09	1496.04	1065.75	1232.72	726.442	513.679	1266.44	1687.15	614.538	1580.38	1668.73
ENSG00000077232	DNAJC10	-0.354895	0.105343	0.239581	2939.18	2804.89	2304.05	1971.12	2352.61	2894.21	4204.6	3089.96	3920.87	3058.5
ENSG00000077235	GTF3C1	-0.00322642	0.979517	0.988463	4758.97	3990.33	3295.55	3747.68	4147.63	3607.14	3536.81	3679.05	3995.44	3885.34
ENSG00000077238	IL4R	-0.117523	0.862041	0.92488	222.184	134.26	122.757	66.3708	58.2424	94.7615	111.666	428.177	261.653	452.553
ENSG00000077254	USP33	-0.06831	0.671726	0.804867	1348.97	1635.06	1473.94	1617.45	1404.5	1837.67	1673.88	1273.62	1361.9	1176.04
ENSG00000077264	PAK3	-0.712709	0.00476016	0.022259	5550.37	4602.31	7217.76	4695.05	3585.25	7741.22	6493.19	2428.15	4775.17	4567.68
ENSG00000077279	DCX	0.685664	0.168003	0.333423	256.041	182.136	199.158	452.776	419.155	402.072	291.878	170.907	90.2703	90.31
ENSG00000077312	SNRPA	0.107268	0.392281	0.584438	770.238	625.506	729.674	688.256	801.072	828.056	786.081	869.99	686.839	682.342
ENSG00000077327	SPAG6	-0.442047	0.0445169	0.128612	754.368	614.057	999.224	666.436	682.678	740.38	1094.54	599.084	1181.36	793.724
ENSG00000077348	EXOSC5	-0.805982	0.00214631	0.0115751	409.453	552.651	479.01	206.386	287.393	456.095	441.134	230.906	219.788	395.357
ENSG00000077380	DYNC1I2	0.325309	0.0424359	0.123968	1637.81	1930.64	1592.41	1683.82	2048.03	1914.71	1756.8	2756.33	1579.08	1670.73
ENSG00000077420	APBB1IP	-0.224729	0.715958	0.8349	44.4368	54.1203	316.764	56.3697	139.4	92.9903	96.1872	172.725	209.322	190.654
ENSG00000077454	LRCH4	-0.38108	0.215601	0.395576	3134.91	2801.77	1670.52	2217.51	1338.62	1707.48	1482.61	1212.71	1478.34	2215.6
ENSG00000077458	FAM76B	0.105962	0.478748	0.659789	240.17	290.376	227.487	278.212	242.518	202.807	207.853	242.724	259.036	229.789
ENSG00000077463	SIRT6	0.578699	3.74041e-05	0.000376719	724.743	633.832	637.821	998.29	1033.09	623.478	642.354	836.354	494.524	720.473
ENSG00000077514	POLD3	-0.281474	0.175023	0.343024	299.419	375.72	337.367	271.848	234.879	366.647	369.27	283.633	287.818	204.703
ENSG00000077522	ACTN2	2.31911	0.0368706	0.111457	1.05802	3.12232	5.15064	88.1914	1.90959	6.19935	7.7392	36.3632	2.61653	33.1137
ENSG00000077549	CAPZB	-0.0315978	0.827814	0.905366	4313.54	4244.28	5327.48	3793.14	4867.54	4552.98	4725.33	4761.76	3656.6	5187.81
ENSG00000077585	GPR137B	-0.680096	0.19323	0.367268	90.9897	91.5882	109.022	13.6378	83.0671	89.4478	153.678	122.726	115.127	170.585
ENSG00000077616	NAALAD2	-1.60346	0.01811	0.0644967	676.074	804.519	813.801	599.156	42.0109	1018.47	3171.97	561.812	1308.26	737.531
ENSG00000077684	JADE1	0.797137	0.000714708	0.00465944	950.101	856.558	982.914	1795.65	2355.48	1124.74	1179.68	1239.99	784.959	1358.66
ENSG00000077713	SLC25A43	-0.214399	0.727389	0.842395	56.075	109.281	157.953	23.6389	89.7507	194.837	165.84	220.907	164.841	56.1929
ENSG00000077721	UBE2A	0.184746	0.407572	0.598797	944.811	845.109	1341.74	1431.97	1370.13	1076.03	1649.55	1215.44	991.665	1397.8
ENSG00000077782	FGFR1	-2.02233	7.94982e-07	1.26866e-05	8531.87	11797.2	9227.37	671.891	3987.22	11903.6	11607.7	3268.14	11973.2	10099.7
ENSG00000077935	SMC1B	2.38339	0.000902761	0.00566889	9.52217	1.04077	4.2922	55.4605	24.8246	4.42811	4.4224	17.2725	15.6992	5.01722
ENSG00000077942	FBLN1	2.99588	NA	NA	247.576	819.09	103.871	62.7341	80.2027	104.503	137.094	9712.61	601.802	868.983
ENSG00000077943	ITGA8	0.204546	0.835893	0.910178	114.266	86.3843	22.3194	12.7287	7.63835	7.08497	24.3232	164.544	24.857	95.3272
ENSG00000077984	CST7	0.0507957	0.964187	0.980306	6.34812	9.36697	6.00908	5.45514	2.86438	0	7.7392	28.1815	11.7744	41.1412
ENSG00000078018	MAP2	-0.786942	1.76651e-05	0.000195916	5599.04	6013.6	5479.42	3604.94	3611.03	8413.41	6767.38	3297.23	5472.47	4578.72
ENSG00000078043	PIAS2	0.168462	0.115317	0.255878	658.088	586.997	616.36	740.08	762.881	615.507	589.285	586.357	642.358	629.159
ENSG00000078053	AMPH	0.0438078	0.849018	0.918012	2064.2	1430.02	1253.32	1642.91	1830.34	1595.89	1415.17	1054.53	1380.22	1109.81
ENSG00000078061	ARAF	-0.219699	0.203379	0.380284	2343.51	1975.39	1728.04	1430.15	1646.07	1531.24	1352.15	1573.62	1921.84	1783.12
ENSG00000078070	MCCC1	0.379018	0.00989298	0.0403728	499.385	527.673	463.558	633.705	822.078	585.396	623.558	610.902	531.156	477.639
ENSG00000078081	LAMP3	-0.86038	0.25105	0.438102	7.40613	11.4485	54.0817	18.1838	10.5027	6.19935	51.9632	14.5453	30.0901	22.0758
ENSG00000078098	FAP	1.4189	NA	NA	21.1604	9.36697	7.72596	3.63676	3.81918	7.9706	26.5344	154.544	19.624	49.1688
ENSG00000078114	NEBL	-1.17271	9.92924e-06	0.000118335	4453.2	5448.46	4256.15	2743.93	1446.51	4570.69	3398.61	1367.26	4234.85	2872.86
ENSG00000078124	ACER3	-0.916263	0.00119949	0.00714313	632.695	670.259	807.792	508.237	542.323	784.661	1321.19	344.541	1204.91	723.483
ENSG00000078140	UBE2K	0.125083	0.446419	0.635276	1699.18	1511.21	2215.63	2297.52	2091.95	2199	2218.94	1829.98	1671.96	1788.14
ENSG00000078142	PIK3C3	0.0594314	0.669301	0.803882	742.729	725.42	619.794	738.262	703.683	599.566	681.05	572.721	579.561	562.932
ENSG00000078177	N4BP2	-0.434532	0.133499	0.284165	281.433	309.11	255.815	270.029	286.438	412.7	456.613	186.361	425.186	202.696
ENSG00000078237	TIGAR	1.78216	1.0515e-08	2.55147e-07	135.426	113.444	195.724	673.709	648.305	142.585	144.834	315.451	136.06	241.83
ENSG00000078246	TULP3	0.603483	1.37279e-06	2.07892e-05	312.116	314.314	375.997	556.424	488.855	309.082	406.861	516.358	346.69	334.147
ENSG00000078269	SYNJ2	-2.04448	0.000779927	0.0050307	310	139.464	233.496	46.3687	12.4123	235.575	176.896	146.362	459.201	421.446
ENSG00000078295	ADCY2	0.512291	0.1662	0.3311	533.242	423.595	1168.34	1081.94	1753	881.194	1154.25	955.443	1303.03	737.531
ENSG00000078304	PPP2R5C	-0.181495	0.248271	0.43527	2201.74	1962.9	2694.64	1882.02	2105.32	2871.19	2792.75	2458.15	2339.18	2191.52
ENSG00000078319	PMS2P1	0.227263	0.154932	0.315214	219.01	200.87	258.39	294.577	313.172	278.971	290.773	250.906	223.713	237.816
ENSG00000078328	RBFOX1	5.97262	NA	NA	6.34812	8.3262	5.15064	1045.57	0.954794	6.19935	6.6336	5.45448	1.30826	5.01722
ENSG00000078369	GNB1	-0.170363	0.323355	0.515694	11326.1	10449.4	12167.5	10577.5	8505.31	11926.7	11596.6	9080.8	7492.43	8989.86
ENSG00000078401	EDN1	0.049513	0.938402	0.967652	30.6826	13.5301	17.1688	13.6378	7.63835	12.3987	14.3728	47.2722	28.7818	38.1309
ENSG00000078403	MLLT10	-0.0387613	0.794022	0.884885	947.985	819.09	745.984	898.279	744.739	925.475	841.361	718.173	695.997	682.342
ENSG00000078487	ZCWPW1	0.613847	0.0250507	0.0827301	69.8293	71.8135	79.8349	90.0097	130.807	59.3367	65.2304	128.18	122.977	65.2239
ENSG00000078549	ADCYAP1R1	-4.91741	1.28621e-12	6.12377e-11	2700.06	2770.54	704.779	49.0962	41.0561	861.71	241.021	27.2724	447.427	553.901
ENSG00000078596	ITM2A	0.248725	0.694665	0.820782	263.447	111.363	60.0908	167.291	38.1918	61.1079	121.616	321.814	181.849	236.813
ENSG00000078618	NRDC	-0.781554	4.95312e-08	1.04811e-06	4078.66	3880.01	2911.83	2080.23	1982.15	3758.58	3865.18	2057.25	3148.99	2902.96
ENSG00000078668	VDAC3	0.0353665	0.750075	0.856462	2440.85	2823.62	2825.98	2889.4	3199.52	2881.81	3240.51	2629.06	2636.15	2998.29
ENSG00000078674	PCM1	0.0795654	0.516823	0.691861	3421.63	3354.42	2963.34	3657.67	3820.13	3722.27	3963.58	3281.78	3436.81	2897.95
ENSG00000078687	TNRC6C	-0.608501	0.00124939	0.00738663	1307.71	833.661	1254.18	839.182	881.275	1521.5	1210.63	651.811	1135.57	1174.03
ENSG00000078699	CBFA2T2	0.135663	0.446203	0.635066	1106.69	991.858	926.257	1370.15	988.212	936.988	1095.65	838.172	775.801	955.279
ENSG00000078725	BRINP1	-3.05027	2.16797e-05	0.000235184	43.3788	125.934	42.922	4.54595	2.86438	178.896	87.3424	26.3633	129.518	46.1584
ENSG00000078747	ITCH	0.0564238	0.677855	0.808878	464.47	503.735	599.191	610.066	511.77	586.282	643.459	631.811	597.877	540.856
ENSG00000078795	PKD2L2	1.13584	0.0460946	0.131687	16.9283	14.5708	24.8948	10.0011	57.2877	18.5981	14.3728	35.4541	7.84959	11.0379
ENSG00000078804	TP53INP2	-0.54524	0.129512	0.277921	2378.43	1216.67	4422.68	1571.99	1622.2	1509.99	3007.23	1663.62	2222.74	1782.12
ENSG00000078808	SDF4	0.0130264	0.938449	0.967652	5063.68	6841.01	5021.02	5942.46	4279.39	4550.32	4289.73	5490.85	5295.86	5273.1
ENSG00000078814	MYH7B	-0.190656	0.547119	0.715077	205.256	154.035	101.296	136.378	83.0671	114.245	87.3424	118.18	95.5033	141.486
ENSG00000078900	TP73	-2.5588	0.00343607	0.0170438	28.5665	44.7533	15.4519	16.3654	6.68356	27.4543	24.3232	1.81816	176.616	26.0895
ENSG00000078902	TOLLIP	0.394904	0.0103658	0.0418523	3703.07	3201.42	3623.48	4014.98	5526.35	3283.89	3794.42	4057.23	2718.57	3804.06
ENSG00000078967	UBE2D4	-0.398005	0.124497	0.270423	488.805	417.351	604.342	303.669	472.623	544.657	645.67	328.178	328.374	364.25
ENSG00000079101	CLUL1	0.241647	0.421834	0.612555	173.515	290.376	258.39	309.124	176.637	311.739	195.691	363.632	285.202	161.554
ENSG00000079102	RUNX1T1	-0.984185	2.60341e-06	3.65758e-05	1615.6	1754.75	1546.05	686.438	784.841	1831.47	1557.79	795.445	1204.91	950.262
ENSG00000079134	THOC1	0.0404488	0.794487	0.885194	614.709	621.343	454.115	640.069	516.544	464.066	484.253	489.994	541.622	557.915
ENSG00000079150	FKBP7	-0.535384	0.16837	0.33394	153.413	213.359	162.245	64.5524	86.8863	214.32	175.79	247.27	180.541	248.854
ENSG00000079156	OSBPL6	0.312273	0.190433	0.363514	1518.26	1503.92	1188.08	1803.83	1837.98	920.161	1398.58	1035.44	1291.26	970.33
ENSG00000079215	SLC1A3	0.410559	0.350418	0.545069	94.1637	93.6697	238.646	358.221	109.801	201.922	117.194	205.452	219.788	216.744
ENSG00000079246	XRCC5	-0.169879	0.154603	0.314681	4838.32	4796.93	4600.38	4575.95	4615.48	5878.76	5871.84	4221.77	4529.21	4691.1
ENSG00000079257	LXN	-0.31438	0.297871	0.490186	216.894	302.865	332.216	303.669	227.241	315.281	340.525	346.36	443.502	595.042
ENSG00000079263	SP140	0.0355803	0.951598	0.974812	13.7542	11.4485	6.86752	21.8205	12.4123	8.85622	14.3728	16.3634	28.7818	32.1102
ENSG00000079277	MKNK1	-1.41772	5.28886e-15	3.41494e-13	1338.39	1091.77	1089.36	419.136	426.793	900.677	927.598	335.451	820.282	1194.1
ENSG00000079308	TNS1	-1.19612	0.0267941	0.0871593	3023.82	1109.47	1953.81	460.05	754.287	749.236	1270.33	1425.44	1453.48	4552.63
ENSG00000079313	REXO1	0.187042	0.28964	0.481686	988.19	1043.9	863.591	1241.95	881.275	820.971	768.392	901.808	706.463	1007.46
ENSG00000079332	SAR1A	0.0717825	0.554367	0.720532	1058.02	1235.4	1140.01	1289.23	1304.25	1402.82	1341.09	1412.71	1258.55	1458
ENSG00000079335	CDC14A	-0.75022	0.0181737	0.0646747	134.368	93.6697	166.537	125.468	90.7054	193.066	222.226	99.9988	268.194	164.565
ENSG00000079337	RAPGEF3	-0.852792	0.0906848	0.215385	250.751	96.7921	129.624	62.7341	69.7	64.6504	143.728	153.635	206.706	314.078
ENSG00000079385	CEACAM1	-0.620499	0.428404	0.618889	50.7849	98.8736	18.8857	53.6422	8.59315	31.8824	13.2672	22.727	79.8042	12.0413
ENSG00000079387	SENP1	-0.0543839	0.753704	0.858787	296.245	296.621	356.253	360.948	340.862	385.245	427.867	279.997	330.991	284.978
ENSG00000079432	CIC	0.776416	0.00222859	0.0119437	5839.21	4195.36	3142.75	10177.5	5566.45	3621.31	4071.92	5591.75	3506.15	4688.09
ENSG00000079435	LIPE	-0.609528	0.0101445	0.0411733	511.023	531.836	510.772	366.403	312.218	448.125	380.326	191.816	365.006	350.202
ENSG00000079459	FDFT1	-0.185444	0.425528	0.616151	1692.83	2685.2	2235.38	1191.04	1710.99	1696.85	1862.94	2409.97	2025.19	1896.51
ENSG00000079462	PAFAH1B3	0.539005	1.67437e-09	4.66991e-08	865.46	781.622	757.144	1239.23	1157.21	782.004	825.883	1050.9	727.395	795.731
ENSG00000079482	OPHN1	0.398796	0.147106	0.302921	277.201	247.704	278.135	581.881	353.274	306.425	313.99	309.087	497.141	283.975
ENSG00000079616	KIF22	0.4172	0.0940685	0.221198	1073.89	1214.58	832.687	1461.07	1637.47	791.746	750.702	826.354	1009.98	1185.07
ENSG00000079689	SCGN	1.71386	0.0154648	0.0570421	272.969	1112.59	941.709	2500.27	4411.15	1295.66	1328.93	645.447	151.759	270.93
ENSG00000079691	CARMIL1	-0.902239	0.00243672	0.0128725	470.819	741.032	488.452	486.416	186.185	613.736	581.546	249.997	669.832	459.577
ENSG00000079739	PGM1	0.121769	0.330164	0.523438	1256.93	1338.44	1592.41	1620.18	1393.04	1455.08	1258.17	1379.07	1374.99	1140.92
ENSG00000079785	DDX1	-0.443776	0.0086026	0.0361635	3773.95	3568.82	3782.29	3102.15	2600.86	4976.31	4456.67	2769.06	3304.68	3023.38
ENSG00000079805	DNM2	-0.138344	0.40016	0.59152	5467.84	5287.14	4044.97	5286.94	3875.51	4367	4409.13	3590.87	4075.24	5101.51
ENSG00000079819	EPB41L2	1.08255	8.32864e-09	2.03933e-07	1499.21	1591.34	1150.31	3495.83	2156.88	1252.27	1254.86	2999.06	1618.32	1169.01
ENSG00000079841	RIMS1	0.404061	0.167473	0.332792	352.32	242.501	324.49	676.437	467.849	352.477	595.918	349.996	408.179	360.236
ENSG00000079931	MOXD1	1.16727	0.304354	0.497037	4.23208	2.08155	12.8766	16.3654	0	2.65687	19.9008	48.1813	19.624	6.02066
ENSG00000079950	STX7	-0.0289403	0.85388	0.920455	787.166	886.74	958.878	1038.29	830.671	915.733	1053.64	721.81	750.944	812.79
ENSG00000079974	RABL2B	-0.0824567	0.498823	0.676361	829.487	686.911	611.209	665.527	702.729	665.988	715.323	629.084	783.651	646.218
ENSG00000079999	KEAP1	0.649087	4.80069e-23	6.55886e-21	1701.29	1740.18	1716.02	2483.91	2694.43	1564.01	1657.29	2660.88	1572.53	1709.87
ENSG00000080031	PTPRH	-1.061	0.115066	0.255561	148.123	574.508	806.934	322.762	212.919	1227.47	599.235	209.998	150.45	122.42
ENSG00000080166	DCT	-0.140389	0.740821	0.851183	47.6109	89.5066	48.0726	40.9135	40.1014	22.1405	37.5904	44.5449	48.4058	30.1033
ENSG00000080189	SLC35C2	-0.101834	0.258043	0.44573	866.518	923.167	839.554	868.276	791.524	878.537	794.926	814.536	913.169	981.368
ENSG00000080200	CRYBG3	-0.309497	0.610559	0.763275	156.587	65.5688	41.2051	18.1838	59.1972	30.9968	81.8144	119.09	81.1124	111.382
ENSG00000080224	EPHA6	1.3683	0.27351	0.46373	6.34812	219.603	76.4012	2.72757	209.1	2.65687	16.584	262.724	99.4281	8.02755
ENSG00000080298	RFX3	-0.318178	0.139171	0.292229	536.416	480.838	396.599	417.318	329.404	324.138	458.824	341.814	604.418	369.267
ENSG00000080345	RIF1	0.237135	0.142709	0.296817	749.078	785.785	703.062	1089.21	890.823	836.913	797.137	756.355	927.56	620.128
ENSG00000080371	RAB21	0.439145	0.00162507	0.00919262	1245.29	1216.67	1503.99	1611.99	2067.13	1351.46	1684.93	1963.61	1270.33	1436.93
ENSG00000080493	SLC4A4	-2.94649	0.00751116	0.0323914	11.6382	13.5301	9.44284	0	10.5027	183.324	123.827	19.0907	120.36	70.2411
ENSG00000080503	SMARCA2	0.192157	0.24619	0.43295	5113.41	5685.75	5324.9	6786.19	5424.19	4834.61	4662.31	4391.77	4322.51	3962.6
ENSG00000080546	SESN1	-0.102483	0.714821	0.834479	1238.94	1395.68	1481.67	2217.51	1220.23	1544.52	2331.71	953.625	1518.9	1490.11
ENSG00000080561	MID2	-0.32617	0.0427464	0.124662	179.863	209.196	188.857	167.291	152.767	263.03	196.797	165.453	197.548	183.63
ENSG00000080573	COL5A3	-0.15504	0.870946	0.929358	635.87	223.767	296.162	91.8281	106.937	77.0491	234.387	1231.8	231.563	2017.93
ENSG00000080603	SRCAP	-0.18657	0.391981	0.584176	320.58	227.93	210.318	245.481	210.055	288.713	250.971	179.998	173.999	213.734
ENSG00000080608	PUM3	-0.26144	0.023083	0.0778962	315.29	284.132	300.454	262.756	265.433	356.906	337.208	263.633	332.299	288.992
ENSG00000080644	CHRNA3	4.37619	7.71021e-13	3.78563e-11	11.6382	6.24465	6.86752	419.136	203.371	10.6275	29.8512	196.361	2.61653	24.0827
ENSG00000080709	KCNN2	2.38094	0.000428356	0.00304649	46.5528	64.528	49.7895	403.68	338.952	81.4772	182.424	316.36	5.23306	44.1515
ENSG00000080802	CNOT4	-0.13364	0.26687	0.456213	603.071	544.325	641.255	567.334	599.611	631.448	705.373	502.721	531.156	614.108
ENSG00000080815	PSEN1	-0.00302207	0.971877	0.985414	957.507	1012.67	974.33	863.73	1018.77	882.965	927.598	940.898	957.65	889.051
ENSG00000080819	CPOX	-0.618031	0.00308991	0.0156774	246.518	375.72	229.204	192.748	156.586	279.856	238.81	167.271	204.089	274.944
ENSG00000080822	CLDND1	-0.319468	0.012406	0.048059	1353.21	1628.81	1518.58	986.47	1310.93	1450.65	1684.93	1334.53	1393.3	1544.3
ENSG00000080823	MOK	-0.380125	0.0673565	0.174394	610.477	614.057	695.337	630.068	553.781	573.883	733.013	417.268	990.356	648.225
ENSG00000080824	HSP90AA1	-0.335191	0.041687	0.122372	31155.5	27365.1	24632.1	20618.6	19431	33996.4	26876	27755.1	31763.4	23803.7
ENSG00000080839	RBL1	-0.593388	0.00493509	0.0229178	89.9316	100.955	115.031	88.1914	69.7	130.186	114.982	57.2721	112.511	93.3203
ENSG00000080845	DLGAP4	-0.284483	0.197291	0.372047	961.739	1134.44	1220.7	861.911	717.05	1119.43	750.702	1033.62	826.823	1408.84
ENSG00000080854	IGSF9B	0.524692	0.134562	0.285831	156.587	97.8328	187.998	285.485	347.545	356.906	279.717	300.906	200.165	234.806
ENSG00000080947	CROCCP3	-0.112477	0.625265	0.774302	396.757	415.269	308.18	484.598	342.771	347.164	371.482	221.816	387.246	421.446
ENSG00000080986	NDC80	-0.325366	0.656514	0.795746	22.2184	12.4893	24.8948	35.4584	1.90959	30.9968	14.3728	19.9998	14.3909	48.1653
ENSG00000081014	AP4E1	0.379776	0.016423	0.0597528	123.788	144.668	177.697	202.749	204.326	152.327	160.312	216.361	189.698	170.585
ENSG00000081019	RSBN1	-0.0243999	0.892306	0.942284	521.603	480.838	679.026	485.507	715.141	663.331	671.099	598.175	703.846	548.884
ENSG00000081026	MAGI3	-0.288577	0.265957	0.455146	979.726	937.738	786.331	812.815	696.045	1114.11	826.989	514.539	565.17	554.905
ENSG00000081041	CXCL2	-0.506845	0.661829	0.799142	41.2627	37.4679	78.1181	16.3654	0	7.08497	7.7392	39.9995	3.92479	11.0379
ENSG00000081051	AFP	4.17648	3.63036e-06	4.86819e-05	3.17406	3.12232	2.57532	100.92	243.473	1.77124	4.4224	45.454	31.3984	5.01722
ENSG00000081052	COL4A4	-0.802511	0.221915	0.403315	119.556	112.404	30.9038	89.1006	43.9205	23.0262	51.9632	31.8178	136.06	197.678
ENSG00000081059	TCF7	0.128413	0.845207	0.915572	28.5665	22.897	14.5935	59.0973	8.59315	25.683	16.584	37.2723	70.6463	46.1584
ENSG00000081087	OSTM1	0.479836	0.00168052	0.00945244	917.303	1047.02	922.823	1483.8	1454.15	845.769	1146.51	1405.44	1334.43	1058.63
ENSG00000081138	CDH7	3.79439	5.30485e-06	6.7352e-05	12.6962	3.12232	9.44284	7.27351	107.892	2.65687	5.528	195.452	13.0826	6.02066
ENSG00000081154	PCNP	0.0559519	0.775316	0.873236	2356.21	2525.96	3319.59	2946.68	2914.99	3772.75	3704.87	3454.51	2320.86	2907.98
ENSG00000081177	EXD2	-0.425588	0.000186647	0.00150644	881.33	1143.81	882.476	721.896	682.678	917.504	946.393	681.81	927.56	840.886
ENSG00000081181	ARG2	-1.95476	2.49609e-08	5.57598e-07	204.198	242.501	430.937	99.1016	132.716	400.301	380.326	59.9993	433.036	546.877
ENSG00000081189	MEF2C	0.19162	0.780398	0.876542	500.443	301.825	308.18	967.377	103.118	140.814	414.6	784.536	1136.88	988.392
ENSG00000081237	PTPRC	-2.01335	2.39039e-07	4.30042e-06	533.242	1116.75	523.648	138.197	101.208	379.046	379.221	186.361	359.773	719.469
ENSG00000081277	PKP1	-1.54816	0.263518	0.452617	7.40613	6.24465	16.3104	3.63676	0	7.08497	23.2176	28.1815	155.684	2.00689
ENSG00000081307	UBA5	-0.161453	0.207201	0.385415	1490.75	1544.51	1326.29	1350.15	1172.49	1364.74	1353.25	1116.35	1331.81	1085.73
ENSG00000081320	STK17B	0.964914	0.0620475	0.164396	136.484	110.322	301.312	880.095	248.246	311.739	145.939	411.813	438.269	397.364
ENSG00000081377	CDC14B	-0.445503	0.143281	0.297644	329.044	375.72	723.665	518.238	433.477	820.086	678.838	412.722	784.959	623.139
ENSG00000081386	ZNF510	0.0927247	0.535523	0.705257	412.627	326.803	390.59	454.595	441.115	498.605	415.706	383.632	355.848	396.36
ENSG00000081665	ZNF506	0.201202	0.311012	0.503369	416.86	319.518	294.445	460.959	534.685	457.866	388.066	345.451	448.735	397.364
ENSG00000081692	JMJD4	0.193316	0.114068	0.253952	429.556	438.166	393.166	411.863	506.041	426.87	380.326	464.54	414.72	338.161
ENSG00000081721	DUSP12	0.158159	0.399524	0.591212	277.201	304.947	354.536	302.76	460.211	443.697	347.158	398.177	340.149	358.23
ENSG00000081760	AACS	0.439343	0.0360441	0.109556	631.637	661.933	514.206	884.641	760.971	511.004	455.507	556.357	613.576	402.381
ENSG00000081791	KIAA0141	-0.428988	0.0626922	0.165569	1719.28	2058.65	1489.39	1478.34	962.433	1325.78	1116.66	891.808	1297.8	1461.01
ENSG00000081803	CADPS2	-3.8443	1.87345e-23	2.67591e-21	801.979	885.699	837.838	35.4584	23.8699	1004.3	726.379	112.726	784.959	730.507
ENSG00000081818	PCDHB4	2.59591	0.000426229	0.00303594	102.628	72.8542	133.058	451.867	1896.22	530.487	72.9696	1542.71	81.1124	507.743
ENSG00000081842	PCDHA6	-1.00531	0.355466	0.549927	62.4231	4.1631	11.1597	9.09189	42.0109	12.3987	17.6896	8.18172	163.533	7.02411
ENSG00000081853	PCDHGA2	0.830451	0.108316	0.244662	487.747	212.318	436.946	1003.75	443.024	230.262	238.81	150.907	325.758	164.565
ENSG00000081870	HSPB11	-0.10015	0.482386	0.662921	452.832	485.001	523.648	382.769	576.696	472.036	509.682	425.45	521.998	497.708
ENSG00000081913	PHLPP1	1.31467	1.52592e-06	2.28512e-05	226.416	126.975	202.592	530.057	396.24	243.546	179.107	607.266	159.608	299.026
ENSG00000081923	ATP8B1	-1.46002	0.00954541	0.0392431	103.686	212.318	341.659	42.7319	22.9151	142.585	165.84	165.453	245.954	271.933
ENSG00000082014	SMARCD3	-0.890867	0.00496883	0.0230404	8998.45	10976	7049.51	4550.49	3373.29	6473.01	6529.67	3252.69	3634.36	4695.11
ENSG00000082068	WDR70	-0.0497161	0.693219	0.819741	486.689	523.51	434.371	526.421	480.261	489.749	524.054	389.995	467.051	448.539
ENSG00000082074	FYB1	-0.14606	0.73957	0.850338	103.686	96.7921	298.737	89.1006	209.1	109.817	126.038	159.998	210.631	236.813
ENSG00000082126	MPP4	-2.43019	1.81199e-05	0.000200067	16.9283	26.0194	17.1688	2.72757	5.72877	26.5687	24.3232	2.72724	14.3909	14.0482
ENSG00000082146	STRADB	0.383247	0.126036	0.272915	361.843	411.106	558.845	899.188	636.848	501.262	633.509	494.54	494.524	671.304
ENSG00000082153	BZW1	-0.0600937	0.730514	0.844458	968.088	1231.24	1177.78	879.186	978.664	1262.01	989.512	1405.44	1055.77	1252.3
ENSG00000082175	PGR	-0.710378	0.446744	0.635638	25.3925	13.5301	15.4519	0.909189	1.90959	2.65687	13.2672	23.6361	17.0074	222.765
ENSG00000082196	C1QTNF3	0.104302	0.776764	0.87423	94.1637	88.4659	68.6752	111.83	89.7507	89.4478	90.6592	46.3631	70.6463	36.124
ENSG00000082212	ME2	0.0600936	0.729256	0.843493	1828.26	1497.67	1570.09	1989.31	1669.94	1798.7	1942.54	1399.98	1262.48	1421.88
ENSG00000082213	C5orf22	-0.0767532	0.690385	0.817877	190.443	155.075	171.688	154.562	188.094	227.605	220.014	173.634	155.684	148.51
ENSG00000082258	CCNT2	-0.0353422	0.800138	0.888498	844.299	1034.53	701.346	817.361	942.382	853.739	841.361	723.628	825.515	837.876
ENSG00000082269	FAM135A	0.211357	0.368381	0.562248	247.576	172.769	281.568	397.316	249.201	291.37	331.68	267.27	281.277	235.809
ENSG00000082293	COL19A1	-6.85781	0.000205245	0.00163278	0	53.0795	0.85844	0.909189	0.954794	0.885622	93.976	0	189.698	164.565
ENSG00000082397	EPB41L3	-0.239081	0.243088	0.428633	3115.87	3721.81	4486.21	4515.03	3237.71	4765.53	3955.84	2400.88	3954.88	3960.59
ENSG00000082438	COBLL1	-1.05055	0.242273	0.427779	104.744	947.105	123.615	793.722	47.7397	683.7	2105.06	184.543	705.155	289.995
ENSG00000082458	DLG3	-0.991821	9.0449e-13	4.37263e-11	1115.15	1211.46	1390.67	686.438	712.276	1348.8	1275.86	491.812	1245.47	1182.06
ENSG00000082482	KCNK2	7.08298	3.42209e-42	1.6979e-39	6.34812	4.1631	2.57532	1071.93	866.953	7.08497	6.6336	1186.35	24.857	4.01378
ENSG00000082497	SERTAD4	-0.528461	0.411525	0.602344	103.686	59.3242	211.176	116.376	17.1863	185.981	294.09	234.543	192.315	192.661
ENSG00000082512	TRAF5	-2.8092	4.63514e-11	1.7203e-09	334.334	294.539	375.138	52.733	25.7794	280.742	363.742	90.908	337.532	786.7
ENSG00000082515	MRPL22	0.16801	0.210008	0.388414	534.3	589.079	615.502	578.244	728.508	588.053	716.429	720.901	529.847	636.184
ENSG00000082516	GEMIN5	-0.122103	0.400203	0.59152	465.528	470.43	425.786	460.05	406.742	434.84	428.973	313.633	393.788	377.295
ENSG00000082556	OPRK1	-3.34385	0.00437505	0.0208248	10.5802	65.5688	4.2922	1.81838	0.954794	4.42811	13.2672	1.81816	3.92479	7.02411
ENSG00000082641	NFE2L1	-0.0906395	0.59861	0.754576	15327.5	16653.4	10715.1	10126.6	13099.8	12048.9	13304.8	14199.8	11694.6	13246.5
ENSG00000082684	SEMA5B	-1.13809	0.0929955	0.219304	352.32	74.9358	165.679	103.648	39.1466	101.847	92.8704	160.907	166.15	606.08
ENSG00000082701	GSK3B	0.305389	0.180777	0.350655	954.333	757.684	977.763	1374.69	986.302	1219.5	1194.05	1093.62	676.373	741.545
ENSG00000082781	ITGB5	-0.737667	0.290561	0.482706	602.013	909.637	1203.53	216.387	145.129	967.985	872.318	1941.8	1949.31	2457.43
ENSG00000082805	ERC1	-0.177052	0.303259	0.495765	1433.62	1345.72	1160.61	1352.87	1056	1370.06	1400.79	925.444	985.123	1098.77
ENSG00000082898	XPO1	-0.204155	0.0989631	0.229349	2620.71	2597.77	2728.12	2724.84	2322.06	3214.81	3113.37	2153.61	2549.81	2528.68
ENSG00000082996	RNF13	-0.332329	0.0203622	0.0706753	800.921	1109.47	871.317	687.347	840.219	1053	1045.9	824.536	1112.03	919.155
ENSG00000083067	TRPM3	1.48937	0.0030098	0.0153277	238.054	110.322	134.775	852.82	550.916	155.869	529.582	420.904	239.412	109.375
ENSG00000083093	PALB2	-0.399448	0.0451313	0.129969	174.573	267.479	179.414	158.199	143.219	217.863	213.381	168.18	155.684	235.809
ENSG00000083097	DOPEY1	-0.3974	0.100302	0.231214	2464.13	2689.36	1718.6	1718.37	1587.82	1910.29	1708.15	1085.44	1586.93	1418.87
ENSG00000083099	LYRM2	0.353281	0.00847077	0.0357128	1010.41	972.084	1212.12	1389.24	1715.77	1236.33	1255.96	1307.26	1233.69	1137.91
ENSG00000083123	BCKDHB	-0.522091	0.000739537	0.00480801	641.16	642.158	726.24	542.786	479.307	860.824	667.782	399.995	608.343	615.111
ENSG00000083168	KAT6A	0.0149766	0.933341	0.965015	1515.08	1258.3	1520.3	1673.82	1631.74	1952.8	1864.04	1365.44	1462.64	1212.16
ENSG00000083223	ZCCHC6	0.20996	0.26826	0.458167	253.925	224.807	300.454	370.949	260.659	304.654	337.208	387.268	344.074	292.002
ENSG00000083290	ULK2	-0.0087513	0.968168	0.982658	575.562	538.081	582.881	753.718	462.12	513.661	578.229	405.45	617.501	401.378
ENSG00000083307	GRHL2	-7.318	9.11794e-05	0.000805212	6.34812	7.28542	1.71688	0	0	38.9674	2.2112	0	130.826	3.01033
ENSG00000083312	TNPO1	0.341419	0.0151869	0.0562874	2708.53	2778.87	2862.04	4234.09	3467.81	2956.21	3117.79	3015.42	3044.33	2270.79
ENSG00000083444	PLOD1	0.469091	0.0851813	0.206454	2165.77	2866.29	2195.89	4629.59	2345.93	2438.12	1520.2	3015.42	2275.07	3379.6
ENSG00000083457	ITGAE	-0.3469	0.0554469	0.150938	250.751	302.865	438.663	250.936	269.252	370.19	337.208	287.269	368.931	326.119
ENSG00000083520	DIS3	0.1165	0.384178	0.577393	698.293	652.566	631.812	775.538	736.146	736.837	752.913	659.083	677.681	522.794
ENSG00000083535	PIBF1	-0.457546	0.00540302	0.0247374	312.116	295.58	377.714	257.301	212.919	380.817	307.357	249.088	370.239	260.895
ENSG00000083544	TDRD3	0.631942	3.47642e-05	0.000354485	270.853	308.069	288.436	395.497	381.918	298.455	291.878	573.63	277.352	299.026
ENSG00000083635	NUFIP1	0.0772184	0.701354	0.825787	134.368	129.056	146.793	193.657	126.033	182.438	170.262	145.453	134.751	130.448
ENSG00000083642	PDS5B	-0.333708	0.0358291	0.109078	1728.8	1597.59	1331.44	1277.41	1104.7	1730.5	1630.76	1171.8	1245.47	1185.07
ENSG00000083720	OXCT1	0.809052	0.000299639	0.00227431	605.187	859.68	847.28	1668.36	965.297	876.766	779.448	1289.98	732.628	523.798
ENSG00000083750	RRAGB	-0.109263	0.410612	0.601539	928.941	1015.8	1186.36	984.652	1052.18	1173.45	1013.84	820.9	930.176	939.224
ENSG00000083799	CYLD	-0.132386	0.39202	0.584188	2970.92	2543.65	2628.54	2674.83	2546.44	3185.58	3448.37	2368.15	2348.34	2283.84
ENSG00000083807	SLC27A5	-0.0982452	0.656552	0.795746	304.71	338.252	296.162	200.022	364.731	287.827	275.294	234.543	282.585	210.723
ENSG00000083812	ZNF324	-0.173864	0.37485	0.568441	500.443	472.512	301.312	320.944	378.098	379.046	309.568	329.996	396.404	350.202
ENSG00000083814	ZNF671	0.307531	0.0650534	0.169996	561.808	489.164	567.429	661.89	722.779	509.233	597.024	514.539	408.179	445.529
ENSG00000083817	ZNF416	0.207295	0.215132	0.394844	133.31	136.342	155.378	131.832	182.366	130.186	116.088	147.271	119.052	139.479
ENSG00000083828	ZNF586	0.313141	0.170507	0.336937	141.775	176.932	179.414	179.11	259.704	200.151	130.461	162.725	175.307	124.427
ENSG00000083838	ZNF446	0.0930484	0.586064	0.745289	472.935	414.228	347.668	470.051	445.889	347.164	341.63	321.814	417.336	368.264
ENSG00000083844	ZNF264	0.330229	0.0657439	0.171254	395.699	368.434	588.89	509.146	693.181	518.089	459.93	548.175	474.9	440.512
ENSG00000083845	RPS5	0.258087	0.270335	0.460216	3659.69	6569.37	4447.58	3608.57	6223.35	4452.91	4737.5	6868.1	4508.28	4208.44
ENSG00000083857	FAT1	-0.140285	0.885228	0.938429	270.853	43.7125	223.194	66.3708	44.8753	112.474	270.872	882.717	316.6	1318.53
ENSG00000083896	YTHDC1	0.0217507	0.879549	0.934847	2328.7	2227.26	2090.3	2272.06	2468.14	2499.22	2425.69	1899.07	1898.29	1788.14
ENSG00000083937	CHMP2B	-0.181293	0.372417	0.565844	627.405	684.83	923.682	574.608	762.881	835.141	1061.38	769.082	799.35	641.201
ENSG00000084070	SMAP2	-0.296804	0.061057	0.162411	1936.18	1856.74	2791.65	1720.19	1820.79	2332.73	2310.7	1850.89	1791.01	2431.34
ENSG00000084072	PPIE	-0.192745	0.0819912	0.200839	1015.7	1110.51	1018.11	763.719	976.754	1039.72	901.064	962.716	1053.15	1069.67
ENSG00000084073	ZMPSTE24	-0.209735	0.18475	0.355783	643.276	753.521	776.03	726.442	596.746	778.462	821.461	672.719	982.507	634.177
ENSG00000084090	STARD7	0.356981	5.75624e-05	0.000545368	1581.74	1661.08	1630.18	2318.43	2136.83	1833.24	1683.83	1910.89	1556.84	1647.66
ENSG00000084092	NOA1	0.0552627	0.723826	0.840489	356.552	344.496	392.307	345.492	399.104	434.84	443.346	434.54	296.976	376.292
ENSG00000084093	REST	-1.10875	0.203414	0.380284	59.2491	36.4271	53.2233	10.9103	0.954794	30.1111	33.168	72.7264	91.5785	122.42
ENSG00000084112	SSH1	0.0556196	0.744706	0.85325	750.136	485.001	706.496	818.27	746.649	706.726	811.51	653.629	728.704	792.721
ENSG00000084207	GSTP1	-1.0278	0.00864137	0.0363103	8466.27	11872.1	9723.55	1308.32	7211.56	8622.41	9137.78	5140.85	7904.54	9262.79
ENSG00000084234	APLP2	-1.27252	1.38212e-11	5.65259e-10	11886.8	11997	12215.6	3960.43	4354.82	11324.4	10042.2	6414.47	15281.8	10285.3
ENSG00000084444	FAM234B	-1.14102	4.75648e-06	6.13397e-05	1054.85	657.77	1101.38	300.032	571.922	829.828	1259.28	471.813	1079.32	932.2
ENSG00000084453	SLCO1A2	3.4765	NA	NA	1.05802	5.20387	4.2922	167.291	5.72877	13.2843	4.4224	5.45448	9.15785	0
ENSG00000084463	WBP11	-0.262285	0.0457469	0.131105	1587.03	1785.97	1496.26	1211.04	1488.52	1822.61	1730.26	1440.89	1347.51	1814.23
ENSG00000084623	EIF3I	0.514535	0.000127656	0.00107978	1229.42	1348.84	1466.22	1775.65	1645.11	1201.79	1302.4	2294.52	1280.79	1505.17
ENSG00000084628	NKAIN1	-2.71416	0.0258104	0.0846458	4.23208	4.1631	22.3194	4.54595	1.90959	77.0491	14.3728	2.72724	0	18.062
ENSG00000084636	COL16A1	0.738275	0.132782	0.283038	348.088	376.76	582.022	630.977	251.111	633.22	249.866	1560.89	532.464	694.383
ENSG00000084652	TXLNA	0.481741	3.46227e-06	4.6727e-05	2139.31	1831.76	1710.87	2905.77	2759.36	2079.44	1931.48	2483.61	1821.1	2101.21
ENSG00000084674	APOB	-4.82048	0.000131832	0.00111161	5.2901	18.7339	19.7441	0	0.954794	4.42811	11.056	0.90908	30.0901	33.1137
ENSG00000084676	NCOA1	-0.329261	0.109091	0.245971	2728.63	2734.12	2477.46	2412.08	1789.28	2489.48	3003.91	1690.89	2234.52	1605.51
ENSG00000084693	AGBL5	-0.143376	0.272711	0.462705	606.245	518.306	560.561	525.511	558.555	524.288	550.589	393.632	537.697	509.75
ENSG00000084710	EFR3B	-0.395677	0.147207	0.30303	2238.77	1850.5	3267.22	2878.49	1227.87	3238.72	2940.9	1920.89	2428.14	2536.71
ENSG00000084731	KIF3C	-0.332417	0.239418	0.424246	2128.73	2272.01	2031.07	1952.94	1465.61	2110.44	2048.68	999.988	1183.98	1205.14
ENSG00000084733	RAB10	0.142284	0.229609	0.412317	2126.62	2120.06	2390.76	2550.28	2457.64	2566.53	2489.81	2372.7	1976.79	1929.62
ENSG00000084754	HADHA	0.278764	6.05835e-09	1.5129e-07	3862.83	3933.09	3937.66	4777.79	4731.96	3778.95	4024.38	4744.49	4117.11	3770.94
ENSG00000084764	MAPRE3	-0.108365	0.526173	0.698379	6068.8	7318.73	6139.56	6205.22	5930.23	5507.68	6419.11	4674.49	4334.28	6492.28
ENSG00000084774	CAD	-0.18354	0.505098	0.681609	1447.37	1474.78	994.074	1554.71	859.315	1199.13	947.499	656.356	982.507	1090.74
ENSG00000085063	CD59	-0.863468	3.42354e-06	4.63702e-05	8419.72	10582.6	8911.47	4145.9	5089.05	10833.8	7110.11	6429.92	11084.9	9559.81
ENSG00000085117	CD82	2.02389	0.0151555	0.056204	320.58	159.239	97.8622	2412.08	67.7904	210.778	81.8144	409.995	610.96	177.61
ENSG00000085185	BCORL1	-0.500132	0.013847	0.05234	399.931	305.988	473.859	204.568	323.675	371.961	371.482	249.997	346.69	296.016
ENSG00000085224	ATRX	-0.165385	0.277604	0.468447	2360.44	2392.74	2321.22	2322.07	2355.48	3042.11	3041.51	2061.79	2473.93	2002.87
ENSG00000085231	AK6	-0.0152957	0.940446	0.96887	278.259	354.904	317.623	232.752	380.963	322.366	395.805	318.178	251.187	275.947
ENSG00000085265	FCN1	0.608194	0.565321	0.728569	9.52217	12.4893	12.8766	0.909189	9.54794	0.885622	1.1056	31.8178	17.0074	11.0379
ENSG00000085274	MYNN	0.191869	0.291579	0.483664	213.72	206.073	315.906	233.662	321.766	274.543	242.126	285.451	231.563	230.792
ENSG00000085276	MECOM	-0.543418	0.386425	0.579407	139.659	38.5087	66.0999	80.9179	84.9767	47.8236	67.4416	86.3626	323.141	176.606
ENSG00000085365	SCAMP1	-0.140572	0.41683	0.60767	1571.16	2004.53	2160.69	2071.13	1952.55	2721.52	2604.79	1888.16	2158.64	1983.81
ENSG00000085377	PREP	0.685563	0.0376038	0.113129	466.586	608.853	497.037	1469.25	580.515	703.184	457.718	557.266	397.713	650.232
ENSG00000085382	HACE1	-0.189997	0.156503	0.317485	216.894	256.031	243.797	228.207	233.925	278.971	247.654	184.543	231.563	243.837
ENSG00000085415	SEH1L	0.140085	0.425976	0.616516	632.695	562.018	555.411	604.611	646.396	658.903	768.392	699.083	494.524	456.567
ENSG00000085433	WDR47	-0.791796	3.81102e-06	5.07794e-05	1466.41	1164.63	1596.7	685.529	866.953	1365.63	1420.7	710.901	1054.46	1070.67
ENSG00000085449	WDFY1	0.313099	0.0662864	0.172332	824.197	802.437	1033.56	1132.85	1405.46	1244.3	1202.89	1237.26	991.665	990.399
ENSG00000085465	OVGP1	-1.65585	0.000202351	0.00161316	112.15	90.5474	45.4973	38.186	17.1863	41.6242	57.4912	18.1816	91.5785	103.355
ENSG00000085491	SLC25A24	0.236447	0.448949	0.637386	198.908	299.743	267.833	457.322	408.652	435.726	600.341	437.268	426.494	353.212
ENSG00000085511	MAP3K4	-1.66938	6.52867e-05	0.000606063	2204.91	4690.77	2929.86	931.01	854.541	3853.34	1267.02	664.538	2050.05	1187.07
ENSG00000085514	PILRA	-0.297662	0.269884	0.459698	117.44	132.178	141.643	116.376	80.2027	152.327	66.336	103.635	116.436	133.458
ENSG00000085552	IGSF9	-6.16519	5.33436e-10	1.64337e-08	33.8566	12.4893	72.109	0.909189	2.86438	156.755	244.338	0.90908	166.15	93.3203
ENSG00000085563	ABCB1	-2.03245	0.0162454	0.0593087	139.659	50.998	430.079	49.0962	11.4575	48.7092	141.517	80.9081	497.141	43.1481
ENSG00000085644	ZNF213	0.0855162	0.625838	0.774757	751.194	588.038	763.153	673.709	788.66	667.759	784.976	717.264	476.208	758.604
ENSG00000085662	AKR1B1	-0.0969367	0.631382	0.778816	3876.58	4189.12	3585.7	3174.89	3576.66	3800.2	4904.44	3579.96	2880.8	2544.73
ENSG00000085719	CPNE3	-0.0987423	0.492832	0.670998	1930.89	1948.33	2058.54	2313.89	1755.87	1920.03	2357.14	1534.53	1865.59	1922.6
ENSG00000085721	RRN3	0.321487	0.0430231	0.125295	1207.2	1359.25	1236.15	1790.19	1755.87	1309.83	1418.48	1173.62	1221.92	1059.64
ENSG00000085733	CTTN	-0.0417308	0.866695	0.927393	6930.03	5966.76	4725.71	8015.41	4061.69	4812.47	4527.43	3889.05	5820.47	5566.1
ENSG00000085741	WNT11	-2.95728	2.47235e-05	0.000263718	28.5665	79.0989	33.4792	10.0011	1.90959	136.386	22.112	10.909	70.6463	44.1515
ENSG00000085760	MTIF2	0.120468	0.288871	0.480746	575.562	577.63	492.745	691.893	551.871	530.487	593.707	552.721	552.088	536.843
ENSG00000085788	DDHD2	-0.144527	0.440034	0.629755	1594.43	1647.55	1809.59	1703.82	1578.27	2030.73	2254.32	1415.44	1535.9	1242.26
ENSG00000085831	TTC39A	0.715927	2.75152e-05	0.000289493	234.88	224.807	225.77	425.501	291.212	250.631	183.53	424.541	245.954	255.878
ENSG00000085832	EPS15	0.247425	0.0555877	0.151234	1668.5	1581.98	1954.67	2442.99	2068.08	1875.75	1938.12	1819.07	1565.99	1854.36
ENSG00000085840	ORC1	0.763192	0.0743413	0.187284	15.8703	26.0194	14.5935	35.4584	31.5082	17.7124	9.9504	18.1816	22.2405	11.0379
ENSG00000085871	MGST2	-0.0636954	0.780146	0.876363	559.692	529.754	485.877	416.409	570.967	496.834	414.6	627.265	801.966	651.235
ENSG00000085872	CHERP	-0.0741891	0.523628	0.696377	1457.95	1442.51	1387.24	1575.63	1325.25	1597.66	1483.71	1213.62	1233.69	1501.15
ENSG00000085978	ATG16L1	-0.0616932	0.521788	0.69525	461.296	475.634	404.325	460.05	452.572	483.549	454.402	416.359	472.284	486.67
ENSG00000085982	USP40	0.146946	0.364858	0.559071	917.303	741.032	764.012	1019.2	917.557	783.775	635.72	734.537	833.365	954.275
ENSG00000085998	POMGNT1	-0.411703	0.0824253	0.201589	4696.55	5577.51	3354.78	4025.89	2446.18	3877.25	2966.32	2522.7	3619.97	3827.14
ENSG00000085999	RAD54L	0.568546	0.22879	0.411525	19.0443	14.5708	8.5844	25.4573	17.1863	10.6275	11.056	12.7271	17.0074	7.02411
ENSG00000086015	MAST2	-0.26113	0.190975	0.364342	3472.42	1999.33	2799.37	2264.79	2521.61	2688.75	2171.4	1683.62	2343.1	2615.98
ENSG00000086061	DNAJA1	-0.385298	0.00845019	0.035642	6745.93	6206.14	6951.65	4430.48	4621.2	6713.01	6744.16	5209.94	5397.9	4703.14
ENSG00000086062	B4GALT1	0.97971	0.00259824	0.0135698	489.863	423.595	411.193	751.9	563.329	451.667	325.046	1502.71	706.463	527.812
ENSG00000086065	CHMP5	0.0996696	0.46503	0.650373	1740.44	1830.72	2001.88	1541.99	2179.8	1737.59	2071.89	2179.07	1712.52	1753.02
ENSG00000086102	NFX1	0.0712022	0.532001	0.702752	978.668	1004.35	904.796	884.641	1047.41	1025.55	998.357	1112.71	1029.6	822.824
ENSG00000086189	DIMT1	-0.604094	4.06634e-05	0.000406409	511.023	552.651	653.273	444.594	401.968	596.909	769.497	400.904	690.764	652.239
ENSG00000086200	IPO11	-0.560629	0.000246003	0.00190949	335.392	315.355	254.098	195.476	181.411	254.173	299.618	198.18	231.563	288.992
ENSG00000086205	FOLH1	1.4012	0.261337	0.449936	23.2764	5.20387	17.1688	1.81838	60.152	3.54249	25.4288	255.452	13.0826	192.661
ENSG00000086232	EIF2AK1	0.142452	0.341672	0.53593	2135.08	2204.36	2920.41	3070.33	2399.4	2764.03	2610.32	2561.79	2108.92	2231.66
ENSG00000086289	EPDR1	0.400843	0.108995	0.245872	652.798	1123	1005.23	1056.48	1113.29	1025.55	1362.1	1729.07	794.117	927.182
ENSG00000086300	SNX10	1.31234	0.00120934	0.00719498	83.5835	219.603	176.839	670.982	371.415	320.595	212.275	403.632	104.661	239.823
ENSG00000086475	SEPHS1	0.121045	0.47804	0.659339	1423.04	1578.86	1707.44	1401.06	1758.73	1774.79	1871.78	1931.8	1301.72	1264.34
ENSG00000086504	MRPL28	0.38246	0.000337506	0.00250822	1925.59	1564.28	1942.65	2423.9	2221.81	1523.27	1700.41	2223.61	1822.41	1818.24
ENSG00000086544	ITPKC	0.25935	0.233988	0.417489	444.368	367.394	452.398	730.988	413.426	410.929	435.606	452.722	414.72	588.018
ENSG00000086570	FAT2	-4.15763	0.000396671	0.00286217	19.0443	22.897	12.0182	2.72757	5.72877	63.7648	9.9504	3.63632	366.314	10.0344
ENSG00000086589	RBM22	-0.0644792	0.469606	0.653477	867.576	939.82	913.38	888.278	826.852	917.504	998.357	868.172	796.733	866.976
ENSG00000086598	TMED2	0.100024	0.412595	0.603162	2431.33	3133.77	3056.91	2883.95	3156.55	3057.17	2843.6	3457.23	3414.57	2741.41
ENSG00000086619	ERO1B	-0.86667	0.0057774	0.0260716	903.548	1038.69	1276.5	310.943	964.342	1033.52	1180.78	427.268	889.62	919.155
ENSG00000086666	ZFAND6	0.301506	0.0184335	0.0653605	809.385	860.721	921.965	996.472	1129.52	884.736	964.083	1165.44	1053.15	740.542
ENSG00000086712	TXLNG	0.193811	0.225921	0.408191	579.795	582.834	549.402	697.348	764.79	734.18	793.821	677.265	516.765	606.08
ENSG00000086730	LAT2	-0.641031	0.147842	0.304171	80.4095	74.9358	221.478	71.826	103.118	123.987	110.56	122.726	256.42	215.74
ENSG00000086758	HUWE1	-0.345582	0.00338247	0.0168533	8092.79	6986.72	6310.39	6337.05	5331.57	7838.64	7516.97	5251.76	6294.06	7126.46
ENSG00000086827	ZW10	-0.0474931	0.800368	0.888551	302.593	390.291	268.692	282.758	286.438	301.997	234.387	254.542	238.104	248.854
ENSG00000086848	ALG9	0.427572	0.00461895	0.0217442	227.474	207.114	182.848	247.299	305.534	215.206	220.014	253.633	172.691	172.592
ENSG00000086991	NOX4	-1.42122	0.0247625	0.0819794	27.5085	15.6116	12.0182	3.63676	15.2767	23.0262	18.7952	6.36356	13.0826	47.1619
ENSG00000087008	ACOX3	0.199783	0.274267	0.464645	176.689	202.951	163.962	227.297	178.547	239.118	199.008	249.088	156.992	190.654
ENSG00000087053	MTMR2	-0.295749	0.0773796	0.192902	721.569	569.304	684.177	644.615	552.826	748.35	846.889	514.539	550.78	780.679
ENSG00000087074	PPP1R15A	-0.0551424	0.877449	0.933639	542.764	445.452	869.6	270.029	491.719	570.34	610.291	1003.62	583.486	657.256
ENSG00000087076	HSD17B14	-0.196638	0.388283	0.581329	825.255	894.026	579.447	720.987	669.311	627.906	917.648	501.812	503.682	711.442
ENSG00000087077	TRIP6	-0.378473	0.543579	0.712057	279.317	245.623	159.67	117.285	48.6945	240.889	92.8704	443.631	350.615	480.65
ENSG00000087085	ACHE	-4.23434	2.14605e-25	3.48807e-23	1177.58	1973.31	798.349	77.2811	42.9657	1419.65	704.267	50.9085	918.402	527.812
ENSG00000087086	FTL	0.0769829	0.79741	0.886983	9447.05	9215.02	10689.3	4801.43	9851.57	7407.34	7976.9	14821.6	8558.67	11905.9
ENSG00000087087	SRRT	0.0892243	0.56207	0.726213	4318.83	4119.39	3210.57	4597.77	3734.2	3414.96	3184.13	3208.14	3377.94	3686.65
ENSG00000087088	BAX	0.0774269	0.655685	0.795309	869.692	650.484	749.418	640.069	889.868	641.19	689.894	862.717	743.094	947.251
ENSG00000087095	NLK	0.123627	0.441378	0.631104	666.552	590.119	819.81	816.452	841.174	898.02	875.635	776.355	715.621	645.215
ENSG00000087111	PIGS	-0.134948	0.331743	0.52477	1924.54	1792.21	1538.32	1245.59	1837.98	1774.79	1641.82	1598.16	1771.39	1552.33
ENSG00000087116	ADAMTS2	2.4253	0.0018617	0.0102871	202.082	216.481	72.9674	1856.56	75.4287	46.0523	113.877	671.81	99.4281	380.305
ENSG00000087152	ATXN7L3	0.366981	0.000149515	0.00123638	2302.25	2035.76	2117.77	2437.54	2821.42	2040.47	1969.07	2571.79	1857.74	1841.32
ENSG00000087157	PGS1	-0.231844	0.065931	0.17167	1061.19	1016.84	840.413	795.541	900.371	859.053	857.945	743.628	979.89	1070.67
ENSG00000087191	PSMC5	0.768017	2.49857e-12	1.13787e-10	3012.18	2885.03	3079.22	5887	4857.04	2885.36	2789.43	4183.59	2914.81	2886.91
ENSG00000087206	UIMC1	0.0798119	0.585991	0.745247	369.249	449.615	408.618	461.868	350.409	376.389	344.947	398.177	404.254	320.099
ENSG00000087237	CETP	1.34918	0.12706	0.274724	81.4675	65.5688	11.1597	198.203	11.4575	9.74184	14.3728	52.7267	17.0074	41.1412
ENSG00000087245	MMP2	1.214	0.366154	0.560346	304.71	55.1611	506.48	88.1914	69.7	68.1929	688.789	4744.49	953.725	2354.08
ENSG00000087250	MT3	-2.33696	1.19623e-10	4.12315e-09	193.618	483.96	282.427	43.6411	86.8863	303.768	276.4	38.1814	248.57	197.678
ENSG00000087253	LPCAT2	-0.6919	0.190278	0.363402	59.2491	58.2834	128.766	51.8238	33.4178	61.1079	65.2304	106.362	191.007	159.548
ENSG00000087258	GNAO1	-0.184746	0.472072	0.654974	7696.03	6153.06	5452.81	6657.08	4600.2	6298.54	5602.07	3596.32	3653.98	4535.57
ENSG00000087263	OGFOD1	0.475982	0.00217643	0.0117208	415.802	418.391	502.187	720.987	764.79	602.223	590.39	641.811	535.08	504.732
ENSG00000087266	SH3BP2	-0.457955	0.125551	0.272148	766.006	558.896	509.055	511.874	281.664	406.5	353.792	430.904	535.08	795.731
ENSG00000087269	NOP14	0.0475451	0.655378	0.795039	595.665	599.486	570.004	640.978	605.34	699.641	518.526	614.538	612.268	604.073
ENSG00000087274	ADD1	-0.166198	0.190113	0.36333	7425.18	6415.34	5779.02	5767.9	5234.18	6249.83	5816.56	5192.67	5015.89	5697.56
ENSG00000087299	L2HGDH	0.194946	0.204918	0.382187	335.392	262.275	335.65	421.864	381.918	343.621	341.63	305.451	357.156	285.982
ENSG00000087301	TXNDC16	-1.16751	7.82885e-06	9.59098e-05	712.047	940.86	807.792	459.141	305.534	1047.69	872.318	299.087	737.861	456.567
ENSG00000087302	RTRAF	0.367868	0.00127975	0.00752368	1043.21	1045.98	1269.63	1322.87	1441.74	1206.22	1181.89	1713.62	1138.19	1210.15
ENSG00000087303	NID2	-0.69694	0.334107	0.52709	185.153	94.7105	79.8349	48.187	28.6438	23.0262	123.827	167.271	88.962	328.126
ENSG00000087338	GMCL1	-0.0203779	0.897107	0.945399	420.034	418.391	529.658	465.505	480.261	441.04	574.912	419.995	474.9	373.281
ENSG00000087365	SF3B2	0.199792	0.0622389	0.164683	6721.6	6736.94	6143.86	8517.29	6523.15	6408.36	6520.83	6794.47	5707.96	6119
ENSG00000087448	KLHL42	-0.252101	0.092057	0.217839	1403.99	1139.65	1200.96	1137.4	1264.15	1277.95	1268.12	809.081	1394.61	1237.25
ENSG00000087460	GNAS	0.948348	0.00647906	0.0286281	198649	272781	181983	421350	344011	216305	89359	232337	142180	105153
ENSG00000087470	DNM1L	-0.0893726	0.428898	0.619338	2731.81	3147.3	2960.76	2957.59	2738.35	3254.66	3236.09	2581.79	2492.24	2722.34
ENSG00000087494	PTHLH	-2.65277	0.00661459	0.0291314	5.2901	29.1417	27.4701	0.909189	0	6.19935	8.8448	6.36356	18.3157	250.861
ENSG00000087495	PHACTR3	-0.593133	0.177158	0.345816	184.095	198.788	161.387	70.0076	99.2986	75.2779	161.418	90.908	51.0223	83.2859
ENSG00000087502	ERGIC2	0.0291412	0.795017	0.885553	470.819	594.282	508.197	577.335	553.781	623.478	580.44	567.266	574.328	532.829
ENSG00000087586	AURKA	-0.311911	0.247783	0.434738	57.133	43.7125	49.7895	52.733	40.1014	60.2223	39.8016	29.0906	49.7141	52.1791
ENSG00000087589	CASS4	-1.55392	0.00986268	0.0403015	30.6826	37.4679	44.6389	12.7287	8.59315	17.7124	13.2672	16.3634	30.0901	84.2893
ENSG00000087842	PIR	0.353788	0.248416	0.435484	158.703	90.5474	229.204	212.75	192.868	182.438	253.182	252.724	138.676	148.51
ENSG00000087884	AAMDC	-0.703985	3.25929e-05	0.000335796	559.692	604.69	807.792	345.492	399.104	655.36	570.49	398.177	481.441	659.263
ENSG00000087903	RFX2	-0.621891	0.00463007	0.0217899	390.409	313.273	440.38	309.124	291.212	476.465	592.602	332.723	600.494	538.849
ENSG00000087995	METTL2A	0.140434	0.519674	0.694037	215.836	228.97	345.093	282.758	352.319	372.847	305.146	349.087	357.156	257.885
ENSG00000088002	SULT2B1	2.03712	0.00769688	0.0330187	2.11604	0	3.43376	9.09189	12.4123	2.65687	1.1056	10.909	77.1876	4.01378
ENSG00000088035	ALG6	-0.342349	0.0900255	0.214419	122.73	133.219	127.049	101.829	127.942	150.556	124.933	101.817	194.931	129.444
ENSG00000088038	CNOT3	0.173976	0.295556	0.48791	2174.23	1762.03	1645.63	2208.42	1774.01	1617.15	1538.99	1659.98	1323.96	1606.51
ENSG00000088053	GP6	-1.05332	0.15528	0.315751	11.6382	12.4893	19.7441	0.909189	14.3219	7.9706	9.9504	4.5454	24.857	9.031
ENSG00000088179	PTPN4	0.0794945	0.552485	0.719227	434.846	396.535	484.16	550.06	457.346	511.889	542.85	463.631	439.577	437.502
ENSG00000088205	DDX18	-0.0272469	0.855909	0.921568	531.126	567.222	454.115	557.333	528.001	585.396	526.266	549.085	722.162	504.732
ENSG00000088247	KHSRP	0.396656	0.00833577	0.0352067	4858.42	4172.47	3947.11	6780.73	5476.7	4669	4880.12	5003.58	3439.43	4625.88
ENSG00000088256	GNA11	0.0774549	0.47654	0.658315	2577.33	2281.38	2734.99	2589.37	2945.54	2423.95	2548.41	2278.16	2221.43	2485.53
ENSG00000088280	ASAP3	0.565321	0.0830834	0.202785	575.562	864.884	654.99	1786.56	577.65	774.919	683.261	698.174	659.365	616.115
ENSG00000088298	EDEM2	0.600406	3.19676e-08	6.99208e-07	399.931	385.087	415.485	592.791	657.853	384.36	358.214	592.72	469.667	426.464
ENSG00000088305	DNMT3B	-0.627006	0.0668678	0.173391	74.0613	49.9572	43.7804	38.186	41.0561	35.4249	46.4352	33.636	77.1876	81.279
ENSG00000088320	REM1	-0.818431	0.388412	0.581477	58.1911	48.9164	38.6298	8.1827	12.4123	6.19935	29.8512	88.1808	43.1727	222.765
ENSG00000088325	TPX2	0.456635	0.450723	0.639086	123.788	38.5087	56.6571	156.381	27.689	76.1635	30.9568	68.181	26.1653	76.2617
ENSG00000088340	FER1L4	1.47759	0.00431882	0.0206118	63.4812	55.1611	118.465	562.788	201.462	128.415	69.6528	251.815	252.495	164.565
ENSG00000088356	PDRG1	-0.415847	0.000937058	0.00585009	815.733	865.925	910.805	553.696	657.853	812.115	825.883	591.811	698.613	680.335
ENSG00000088367	EPB41L1	-0.776915	3.7966e-07	6.48379e-06	2535.01	2416.68	2635.41	1692.91	1370.13	2722.4	2564.99	1399.98	1902.22	3063.51
ENSG00000088387	DOCK9	-0.467018	0.00297344	0.015174	1589.14	1076.16	1400.12	1090.12	1000.62	1220.39	1723.63	940.898	1365.83	1403.82
ENSG00000088448	ANKRD10	0.00278384	0.988808	0.993104	1554.23	1747.46	1057.6	1348.33	1585.91	1163.71	1100.07	1260.89	1610.47	1538.28
ENSG00000088451	TGDS	-0.0573341	0.767377	0.868435	119.556	130.097	169.971	120.013	160.405	151.441	184.635	145.453	149.142	128.441
ENSG00000088538	DOCK3	-0.536673	0.0817373	0.200474	2274.74	1466.45	1261.05	1482.89	844.038	1432.05	1267.02	696.356	1628.79	904.103
ENSG00000088543	C3orf18	-0.129307	0.389956	0.582535	851.705	988.736	1001.8	1017.38	874.591	1264.67	1163.09	888.171	904.011	919.155
ENSG00000088682	COQ9	0.972219	7.63926e-15	4.84952e-13	822.081	976.247	934.841	2111.14	1709.08	838.684	906.592	1527.25	887.004	994.413
ENSG00000088727	KIF9	-0.819029	8.7018e-06	0.000105304	293.071	268.52	390.59	158.199	198.597	288.713	372.587	170.907	303.517	253.871
ENSG00000088756	ARHGAP28	1.8661	0.000870006	0.00550624	21.1604	11.4485	12.0182	83.6454	115.53	50.4804	37.5904	122.726	15.6992	57.1963
ENSG00000088766	CRLS1	0.21325	0.316541	0.509134	219.01	325.763	448.964	374.586	406.742	295.798	351.581	366.359	375.472	293.006
ENSG00000088808	PPP1R13B	0.102981	0.581641	0.741514	1050.61	1107.38	911.663	1385.6	870.772	1030.86	843.573	830.899	909.244	853.931
ENSG00000088812	ATRN	-0.0833523	0.611723	0.764157	2697.95	2825.7	2189.02	2242.06	2186.48	2379.67	2413.52	2174.52	2165.18	1652.67
ENSG00000088826	SMOX	0.0584416	0.853878	0.920455	209.488	177.972	163.962	112.739	193.823	160.298	124.933	277.269	198.856	272.937
ENSG00000088827	SIGLEC1	1.95914	0.0211866	0.0728796	41.2627	101.996	14.5935	201.84	18.1411	10.6275	37.5904	318.178	19.624	97.3341
ENSG00000088832	FKBP1A	0.763946	0.000462215	0.00323963	2136.14	1712.07	2617.38	3601.3	3453.49	2164.46	2657.86	4971.76	1991.18	3245.14
ENSG00000088833	NSFL1C	-0.00587235	0.949069	0.973401	1413.51	1478.94	1598.42	1423.79	1574.46	1430.28	1557.79	1551.8	1445.63	1732.95
ENSG00000088836	SLC4A11	-2.44832	0.000749065	0.00485656	77.2354	70.7727	10.3013	15.4562	10.5027	28.3399	53.0688	17.2725	150.45	161.554
ENSG00000088854	C20orf194	-0.0273077	0.852345	0.920027	794.572	789.948	551.119	753.718	681.723	787.318	726.379	642.72	647.591	645.215
ENSG00000088876	ZNF343	-0.24867	0.307722	0.500413	217.952	326.803	180.272	143.652	182.366	187.752	205.642	219.997	171.383	223.768
ENSG00000088881	EBF4	-3.16176	4.99781e-08	1.05638e-06	818.907	2323.01	379.431	47.2778	82.1123	851.968	361.531	158.18	559.937	710.438
ENSG00000088882	CPXM1	-1.6544	0.277565	0.468422	4.23208	1.04077	18.0272	4.54595	0	2.65687	18.7952	44.5449	234.179	82.2824
ENSG00000088888	MAVS	0.181464	0.130128	0.279053	2044.09	1543.47	1979.56	2202.06	2388.9	2051.1	1847.46	1914.52	1921.84	1995.85
ENSG00000088899	LZTS3	1.19314	6.45397e-14	3.63925e-12	1529.9	1576.77	1184.65	3162.16	3587.16	1550.72	1348.83	2627.24	1266.4	1110.81
ENSG00000088930	XRN2	-0.481858	0.000534496	0.00364331	1360.61	1592.39	1277.36	1164.67	882.23	1500.24	1324.51	878.172	1287.33	1189.08
ENSG00000088970	KIZ	0.187601	0.182863	0.353211	714.163	693.156	757.144	1021.93	840.219	872.337	998.357	888.171	811.124	789.71
ENSG00000088986	DYNLL1	0.0399183	0.826275	0.904374	4314.6	3264.91	4850.19	3740.4	4384.41	4882.43	5398.64	5491.75	4139.35	4053.91
ENSG00000088992	TESC	-2.07463	2.87935e-06	4.00053e-05	303.652	548.488	590.607	175.474	52.5137	727.981	353.792	123.635	232.871	698.397
ENSG00000089006	SNX5	0.0209704	0.899267	0.946771	745.904	926.29	798.349	580.063	931.879	771.377	800.454	907.262	803.275	717.462
ENSG00000089009	RPL6	0.24285	0.19134	0.364765	12248.7	12473.7	14210.6	11882.2	18420.8	15702.1	17331.4	18896.1	12917.8	12127.6
ENSG00000089022	MAPKAPK5	0.134979	0.144729	0.299727	632.695	584.915	629.237	653.707	724.689	642.076	602.552	713.628	726.087	631.166
ENSG00000089041	P2RX7	-0.314354	0.358126	0.552607	60.3071	52.0387	103.013	40.0043	61.1068	67.3073	44.224	72.7264	92.8868	84.2893
ENSG00000089048	ESF1	0.0773596	0.685826	0.814664	435.904	377.801	498.754	436.411	542.323	523.402	577.123	583.63	626.659	417.433
ENSG00000089050	RBBP9	1.22699	4.54769e-10	1.42429e-08	203.14	183.176	310.755	578.244	594.837	317.053	242.126	646.356	279.969	275.947
ENSG00000089053	ANAPC5	0.118189	0.449478	0.637849	2926.48	2933.94	2309.2	3694.95	2572.22	2430.15	2557.25	2427.24	2802.3	2734.39
ENSG00000089057	SLC23A2	-0.933987	0.00464118	0.0218271	7253.78	9318.06	7768.02	6655.27	2738.35	7286.9	6439.01	1981.8	6856.62	5788.87
ENSG00000089060	SLC8B1	-0.910728	0.00839627	0.0354463	321.638	425.677	249.806	190.93	76.3835	266.572	174.685	204.543	307.442	325.116
ENSG00000089063	TMEM230	0.138278	0.382296	0.575382	2177.4	2781.99	3184.81	2832.12	3011.42	3376.88	3084.62	3416.32	2557.66	2465.46
ENSG00000089091	DZANK1	0.448526	0.0503125	0.1402	241.228	181.095	209.459	426.41	319.856	226.719	284.139	226.361	238.104	282.971
ENSG00000089094	KDM2B	-0.269207	0.0806981	0.198679	931.057	774.336	613.785	677.346	563.329	652.703	718.64	567.266	737.861	658.259
ENSG00000089101	CFAP61	-0.0130768	0.954844	0.976412	174.573	282.05	285.002	184.565	232.97	199.265	199.008	261.815	181.849	275.947
ENSG00000089123	TASP1	0.108062	0.32215	0.514468	398.873	405.902	424.069	480.961	453.527	443.697	489.781	452.722	463.126	380.305
ENSG00000089127	OAS1	0.864446	0.0386225	0.11531	163.993	291.417	446.389	408.226	253.975	238.232	341.63	977.261	359.773	259.892
ENSG00000089154	GCN1	0.199865	0.394926	0.586941	3105.29	3129.61	2256.84	4507.76	2378.39	2646.24	2266.48	2246.34	2692.41	2456.43
ENSG00000089157	RPLP0	0.350018	0.0371687	0.112125	7295.04	9341.99	9300.34	8117.24	10895.2	8711.86	7660.7	13788	8795.46	8940.69
ENSG00000089159	PXN	0.172788	0.601976	0.756745	1898.09	1140.69	1244.74	1842.02	1471.34	1578.18	740.752	1274.53	839.906	2053.05
ENSG00000089163	SIRT4	-0.345559	0.374152	0.567656	15.8703	14.5708	18.0272	9.09189	17.1863	16.8268	15.4784	11.818	14.3909	17.0585
ENSG00000089169	RPH3A	2.49343	0.0491585	0.13791	7.40613	2.08155	42.922	215.478	11.4575	3.54249	33.168	3.63632	5.23306	1.00344
ENSG00000089177	KIF16B	-0.604322	0.00155744	0.00888469	494.095	456.9	473.001	328.217	238.699	469.38	632.403	384.541	447.427	403.385
ENSG00000089195	TRMT6	-0.0995495	0.586441	0.745718	439.078	500.613	410.334	390.042	367.596	528.716	503.048	477.267	333.608	370.271
ENSG00000089199	CHGB	0.0455516	0.887947	0.939892	32229.4	53951.7	41385.4	31187.9	68856.9	65861.9	38148.7	63523.8	72726.4	65494.8
ENSG00000089220	PEBP1	0.163315	0.396208	0.588013	9607.87	10047.6	16000.5	12391.3	15277.7	9399.1	11532.5	11774.4	13010.7	12585.2
ENSG00000089234	BRAP	0.313649	0.0104445	0.0421042	383.003	441.289	455.832	557.333	560.464	456.981	511.893	506.358	419.953	379.302
ENSG00000089248	ERP29	-0.108902	0.69949	0.824365	4056.45	5831.46	4311.09	3144.89	4875.18	5635.21	2430.11	5215.39	5459.39	5580.15
ENSG00000089250	NOS1	3.78991	2.81081e-07	4.95744e-06	45.4948	26.0194	151.085	1537.44	1050.27	25.683	228.859	593.629	35.3232	24.0827
ENSG00000089280	FUS	-0.26834	0.15799	0.319849	11839.2	13917.2	8801.59	10694.8	8164.45	9835.72	10968.7	7476.28	8306.17	10342.5
ENSG00000089289	IGBP1	0.220338	0.0637292	0.167487	814.675	1000.18	842.13	913.735	1083.69	862.596	1014.94	1142.71	834.673	920.158
ENSG00000089327	FXYD5	-0.343052	0.594895	0.752	261.331	130.097	227.487	79.0995	63.9712	156.755	203.43	507.267	461.817	484.663
ENSG00000089335	ZNF302	0.0795702	0.538087	0.707639	800.921	857.598	654.131	726.442	815.394	614.622	739.646	758.173	667.215	745.559
ENSG00000089351	GRAMD1A	0.060771	0.684515	0.813945	1902.32	1757.87	1731.47	1962.03	1943.96	1699.51	1481.5	1480.89	1440.4	2034.98
ENSG00000089356	FXYD3	1.73857	0.00100432	0.00618604	7.40613	12.4893	4.2922	36.3676	32.463	14.1699	4.4224	22.727	439.577	6.02066
ENSG00000089472	HEPH	-0.796365	0.345434	0.539785	121.672	446.492	77.2596	35.4584	21.9603	43.3955	72.9696	239.088	96.8116	343.178
ENSG00000089486	CDIP1	0.617747	2.15524e-06	3.10664e-05	2022.93	2491.61	2242.25	3384	3477.36	2288.45	2070.79	2869.97	1907.45	1771.08
ENSG00000089505	CMTM1	0.341082	0.25063	0.437615	31.7406	31.2232	20.6026	40.9135	37.237	31.8824	38.696	31.8178	23.5488	25.0861
ENSG00000089597	GANAB	0.0381988	0.76505	0.867154	6906.75	7470.68	5512.9	6727.09	6226.21	6604.08	5274.82	6707.19	6814.75	6093.92
ENSG00000089639	GMIP	0.29435	0.353733	0.548145	142.833	111.363	160.528	233.662	128.897	132.843	97.2928	200.907	191.007	236.813
ENSG00000089682	RBM41	0.0345733	0.83503	0.909772	106.86	105.118	122.757	141.834	105.027	114.245	111.666	106.362	116.436	127.437
ENSG00000089685	BIRC5	0.363677	0.5281	0.699891	52.901	9.36697	31.7623	69.0984	19.0959	37.1961	24.3232	29.9996	18.3157	40.1378
ENSG00000089692	LAG3	1.30201	5.20276e-05	0.000499709	20.1024	18.7339	12.8766	42.7319	48.6945	12.3987	24.3232	38.1814	17.0074	18.062
ENSG00000089693	MLF2	0.399659	5.15429e-05	0.000495558	5386.38	5021.74	5820.22	6255.22	7798.76	5286.28	5480.46	6799.01	4730.69	5152.69
ENSG00000089723	OTUB2	0.165626	0.68603	0.814664	37.0307	46.8349	38.6298	70.0076	57.2877	51.3661	28.7456	21.8179	68.0298	40.1378
ENSG00000089737	DDX24	-0.166113	0.28274	0.474311	8309.68	9165.06	6465.77	5998.83	6934.67	7878.49	7576.68	6984.46	5807.39	6941.83
ENSG00000089775	ZBTB25	0.330189	0.0525582	0.144873	331.16	317.436	373.421	489.144	498.403	335.651	442.24	340.905	321.833	343.178
ENSG00000089818	NECAP1	-0.0178649	0.918671	0.9571	2909.55	3298.22	3623.48	2766.66	3802.95	3909.13	3916.03	3214.51	2577.28	2876.87
ENSG00000089820	ARHGAP4	-0.182089	0.637697	0.783564	507.849	385.087	400.892	412.772	296.941	243.546	285.245	516.358	533.772	890.055
ENSG00000089847	ANKRD24	3.92804	2.40412e-11	9.48269e-10	180.921	222.726	150.227	6627.99	679.813	95.6472	149.256	1185.44	289.127	214.737
ENSG00000089876	DHX32	-0.436648	0.00566812	0.0257262	324.812	312.232	324.49	257.301	276.89	345.392	354.898	241.815	469.667	323.109
ENSG00000089902	RCOR1	-0.162979	0.23637	0.420466	892.968	629.669	774.313	674.618	729.463	782.89	833.622	644.538	796.733	642.204
ENSG00000089916	GPATCH2L	-0.0168026	0.914318	0.954586	725.801	682.748	631.812	889.187	644.486	813.001	675.522	577.266	689.456	764.624
ENSG00000090006	LTBP4	-1.3203	0.00654782	0.0288845	3605.73	4204.73	2181.3	1069.21	621.571	2861.44	2386.99	2849.06	3568.95	7644.24
ENSG00000090013	BLVRB	0.0450651	0.890434	0.941625	350.204	369.475	325.349	170.928	267.342	276.314	280.822	577.266	374.164	321.102
ENSG00000090020	SLC9A1	-0.760619	0.00646228	0.0285808	1108.8	1181.28	1170.05	1048.3	387.646	1601.2	1068.01	659.083	977.274	1175.03
ENSG00000090054	SPTLC1	-0.250855	0.0553697	0.150858	861.228	1098.02	828.395	779.175	787.705	874.109	957.449	709.992	951.109	753.586
ENSG00000090060	PAPOLA	-0.107318	0.477469	0.659133	3508.39	2842.36	3499.86	3563.11	3064.89	3909.13	4325.11	3046.33	2971.07	3259.19
ENSG00000090061	CCNK	0.00645784	0.967841	0.982482	329.044	313.273	341.659	364.585	341.816	434.84	393.594	330.905	276.044	318.092
ENSG00000090097	PCBP4	-0.735094	0.0501056	0.13983	4223.61	4298.4	1947.8	2388.44	1331.94	2961.52	1609.75	1208.17	2354.88	1745.99
ENSG00000090104	RGS1	-2.26271	0.00287585	0.0147742	274.027	493.327	1507.42	480.961	51.5589	462.295	510.787	53.6357	1390.69	1925.61
ENSG00000090238	YPEL3	0.0528494	0.791106	0.882993	1066.48	1286.4	1674.82	1097.39	1520.99	898.906	1325.61	1333.62	1259.86	1376.73
ENSG00000090263	MRPS33	0.147876	0.410278	0.601273	807.269	835.742	992.357	680.983	1140.02	965.328	863.473	1043.62	719.546	845.903
ENSG00000090266	NDUFB2	0.437102	0.0279516	0.0901624	1994.37	2578	2693.79	2160.23	3797.22	2188.37	1970.18	2924.51	2047.43	1833.29
ENSG00000090273	NUDC	-0.0458665	0.456598	0.643738	3397.3	3007.84	3332.46	3101.24	3175.65	3372.45	3165.33	3159.96	3112.36	3336.45
ENSG00000090316	MAEA	0.271274	0.0242541	0.0807926	2102.28	2038.88	1836.2	2652.11	2416.58	2106.01	1940.33	2145.43	1664.11	2256.75
ENSG00000090339	ICAM1	0.563276	0.401548	0.592678	77.2354	60.3649	39.4882	51.8238	27.689	15.9412	28.7456	178.18	73.2628	112.386
ENSG00000090372	STRN4	-0.0419134	0.816963	0.899288	2161.53	2052.41	2340.11	2513.91	1788.33	2036.93	2101.75	1968.16	1594.77	2772.52
ENSG00000090376	IRAK3	-0.784174	0.164273	0.328093	102.628	67.6504	82.4103	28.1849	21.0055	37.1961	32.0624	88.1808	116.436	114.393
ENSG00000090382	LYZ	0.189058	0.785363	0.879655	111.092	79.0989	90.9947	230.025	55.3781	54.9085	96.1872	278.179	452.66	269.926
ENSG00000090432	MUL1	-0.307925	0.0310853	0.0981218	1262.22	1502.88	1089.36	941.011	994.896	1082.23	991.723	919.989	1232.39	1089.74
ENSG00000090447	TFAP4	0.759492	0.0524875	0.14472	223.242	214.4	211.176	129.105	629.209	207.235	313.99	409.995	196.24	243.837
ENSG00000090470	PDCD7	-0.0287155	0.814195	0.897725	484.573	550.57	568.287	452.776	504.131	504.804	484.253	559.084	446.118	565.942
ENSG00000090487	SPG21	0.191415	0.216783	0.397099	981.842	1234.36	1071.33	1031.93	1345.3	1103.48	1366.52	1428.17	977.274	1040.57
ENSG00000090520	DNAJB11	0.0112937	0.954868	0.976412	458.122	453.778	491.886	635.523	373.325	494.177	467.669	542.721	557.321	670.301
ENSG00000090530	P3H2	-0.292641	0.400043	0.591492	355.494	519.347	234.354	239.117	185.23	296.683	190.163	361.814	239.412	411.412
ENSG00000090539	CHRD	-0.744389	0.379316	0.572365	158.703	159.239	82.4103	47.2778	27.689	19.4837	68.5472	224.543	160.917	521.791
ENSG00000090554	FLT3LG	-0.116546	0.725675	0.841522	29.6245	37.4679	30.9038	25.4573	23.8699	39.853	26.5344	37.2723	18.3157	35.1205
ENSG00000090565	RAB11FIP3	0.432117	0.0253193	0.0832961	2722.28	2174.18	2329.81	3853.14	2767.95	2141.43	1686.04	2276.34	2070.98	2261.76
ENSG00000090581	GNPTG	0.0571491	0.717203	0.835371	2650.34	2795.52	2031.07	2023.86	2730.71	2375.24	2252.11	3015.42	2591.67	2731.37
ENSG00000090612	ZNF268	-0.104306	0.577952	0.738968	347.03	529.754	397.458	366.403	467.849	464.951	534.005	399.995	472.284	351.205
ENSG00000090615	GOLGA3	0.702723	3.35176e-05	0.00034382	1654.74	1239.56	1988.15	3293.08	2785.13	1703.05	1835.3	2419.06	1984.64	1777.1
ENSG00000090621	PABPC4	-0.429868	0.00281964	0.0145608	1916.07	2082.59	2015.62	1301.05	1379.68	2051.1	1649.55	1747.25	1826.34	2375.15
ENSG00000090659	CD209	2.67434	0.00137298	0.0079674	23.2764	46.8349	6.00908	310.034	8.59315	11.5131	27.64	191.816	27.4736	44.1515
ENSG00000090661	CERS4	-0.0296086	0.906658	0.95109	789.282	804.519	520.215	490.053	791.524	841.341	709.795	749.082	429.111	740.542
ENSG00000090674	MCOLN1	0.0308813	0.895423	0.944412	1451.6	1356.13	767.445	1111.94	1278.47	758.978	1084.59	1038.17	1125.11	1288.42
ENSG00000090686	USP48	0.133554	0.357175	0.551755	1784.88	1758.91	1669.67	2202.97	1816.97	1712.79	1793.28	1458.16	1474.41	1457
ENSG00000090776	EFNB1	0.22629	0.628622	0.776839	408.395	420.473	294.445	520.965	102.163	206.35	258.71	614.538	422.57	458.574
ENSG00000090857	PDPR	0.0162436	0.948494	0.972955	859.112	726.461	498.754	621.885	807.756	561.484	490.886	503.63	506.298	816.803
ENSG00000090861	AARS	0.148246	0.162212	0.325439	4543.13	4172.47	3664.68	4385.93	4322.35	4194.3	3650.69	4295.4	3731.17	3421.74
ENSG00000090863	GLG1	-0.20548	0.0373731	0.112597	5177.95	5388.09	4937.75	4404.11	4575.37	6269.32	4807.15	4875.4	5448.92	5246.01
ENSG00000090889	KIF4A	-3.97564	5.20285e-31	1.36242e-28	361.843	461.063	856.723	45.4595	22.9151	780.233	561.645	43.6359	665.907	428.471
ENSG00000090905	TNRC6A	-0.0693664	0.64753	0.789941	2726.52	2662.3	2030.21	2685.75	2537.84	2648.89	2284.17	1821.8	2447.76	2449.41
ENSG00000090924	PLEKHG2	-1.35369	0.0682727	0.176065	446.484	245.623	234.354	130.923	67.7904	129.301	248.76	288.178	139.984	1459.01
ENSG00000090932	DLL3	-1.07643	0.074221	0.187081	52.901	99.9144	63.5246	18.1838	77.3383	71.7354	126.038	14.5453	26.1653	100.344
ENSG00000090971	NAT14	0.171119	0.351041	0.545768	2749.79	3377.31	2697.22	3586.75	3517.46	2256.56	2459.96	2247.25	2825.85	3013.34
ENSG00000090975	PITPNM2	-0.514721	NA	NA	1813.44	1444.6	1266.2	2459.36	70.6548	1269.1	1035.95	172.725	940.642	1240.26
ENSG00000090989	EXOC1	-0.212373	0.118396	0.260724	808.327	966.88	722.807	815.543	668.356	844.883	896.641	711.81	964.191	736.528
ENSG00000091009	RBM27	-0.0359617	0.845144	0.915557	285.665	294.539	366.554	377.314	339.907	433.955	464.352	342.723	361.081	329.13
ENSG00000091039	OSBPL8	-0.571658	0.0164486	0.0598	1296.07	977.288	1103.1	981.924	782.931	1521.5	1965.76	902.717	1414.23	974.344
ENSG00000091073	DTX2	0.481727	0.0237942	0.0796547	123.788	109.281	121.04	166.382	220.557	129.301	145.939	199.089	194.931	157.541
ENSG00000091106	NLRC4	-0.313051	0.378411	0.571522	15.8703	26.0194	31.7623	26.3665	26.7342	29.2255	30.9568	20.9088	43.1727	38.1309
ENSG00000091127	PUS7	1.1183	0.000655075	0.00432602	58.1911	66.6096	39.4882	156.381	64.926	38.0817	42.0128	101.817	48.4058	55.1894
ENSG00000091129	NRCAM	0.0524206	0.87598	0.932618	4906.03	5313.16	3001.97	5326.94	3635.86	4381.17	3412.99	2478.15	2726.42	2000.87
ENSG00000091136	LAMB1	-0.276464	0.562038	0.726213	920.477	1213.54	660.14	941.011	550.916	380.817	1636.29	1089.08	559.937	1923.6
ENSG00000091137	SLC26A4	-0.202227	0.744115	0.853067	116.382	100.955	52.3648	22.7297	206.236	116.902	59.7024	37.2723	121.669	146.503
ENSG00000091140	DLD	0.0481144	0.721111	0.838359	1879.04	2107.57	1699.71	2091.14	1666.12	1732.28	1883.94	1752.71	1673.27	1460.01
ENSG00000091157	WDR7	-0.24311	0.055617	0.151292	1437.85	1341.56	1183.79	1094.66	1161.98	1476.33	1348.83	1015.44	1076.7	1168.01
ENSG00000091164	TXNL1	0.0612291	0.599847	0.755485	1499.21	1739.13	1734.05	1571.08	1872.35	1852.72	1852.99	1810.89	1436.47	1631.6
ENSG00000091181	IL5RA	-0.334383	0.574266	0.735794	158.703	125.934	183.706	16.3654	171.863	86.7909	262.027	212.725	151.759	210.723
ENSG00000091262	ABCC6	-2.48937	2.00273e-06	2.9113e-05	49.7269	176.932	285.002	28.1849	22.9151	134.615	105.032	29.0906	226.33	73.2514
ENSG00000091317	CMTM6	-0.205029	0.321694	0.514045	739.555	793.07	943.426	548.241	948.111	901.563	1014.94	910.898	1149.96	933.203
ENSG00000091409	ITGA6	0.272343	0.199887	0.376039	705.699	374.679	530.516	823.726	622.526	601.337	737.435	674.538	570.403	577.984
ENSG00000091428	RAPGEF4	-0.064598	0.777156	0.874397	880.272	828.457	1159.75	1182.86	961.478	1007.84	1288.02	834.536	735.245	1367.69
ENSG00000091436	MAP3K20	0.169126	0.706989	0.829418	768.122	610.935	1186.36	455.504	1021.63	952.043	605.869	1355.44	324.45	1428.9
ENSG00000091483	FH	-0.0420738	0.745538	0.853795	1088.7	1391.52	1307.4	1391.97	1051.23	1212.42	1280.28	1109.99	1147.35	1107.8
ENSG00000091490	SEL1L3	0.168764	0.819648	0.900875	119.556	877.373	138.209	538.24	54.4233	231.147	238.81	596.357	641.05	222.765
ENSG00000091513	TF	0.885921	0.361406	0.55547	51.8429	37.4679	23.1779	11.8195	33.4178	275.428	112.771	435.449	58.8719	47.1619
ENSG00000091527	CDV3	0.375087	0.00676174	0.0296548	1417.75	1258.3	1503.13	1591.99	2158.79	1486.96	1620.81	1847.25	1214.07	1567.38
ENSG00000091536	MYO15A	-1.42762	8.65686e-14	4.7864e-12	776.586	879.455	565.712	258.21	265.433	955.586	641.248	295.451	633.2	688.363
ENSG00000091542	ALKBH5	0.310617	0.173071	0.340401	2322.35	1620.49	2444.84	1714.73	3530.83	2478.86	2362.67	2863.6	1966.32	2059.07
ENSG00000091592	NLRP1	2.38767	1.39168e-24	2.15072e-22	22485	23754.6	38190.3	157742	177359	30956	34156.4	149618	23364.3	43217.3
ENSG00000091622	PITPNM3	-0.662998	0.0173021	0.0623005	292.013	397.576	287.577	210.932	219.603	275.428	215.592	106.362	298.284	216.744
ENSG00000091640	SPAG7	0.205102	0.211508	0.390574	1341.57	1497.67	1589.83	1371.06	1800.74	1056.55	1174.15	1578.16	1368.45	1585.44
ENSG00000091651	ORC6	-0.345107	0.377903	0.57105	116.382	118.648	133.058	141.834	82.1123	150.556	68.5472	39.9995	111.203	83.2859
ENSG00000091656	ZFHX4	-0.295576	0.0922256	0.218116	1168.05	1091.77	1204.39	971.923	904.19	1350.57	1387.53	994.534	1233.69	785.697
ENSG00000091664	SLC17A6	-2.10842	0.00277928	0.0143918	1390.24	764.97	1042.15	199.112	251.111	571.226	117.194	23.6361	491.908	389.336
ENSG00000091732	ZC3HC1	-0.0793249	0.60293	0.75759	329.044	413.188	333.933	275.484	374.279	388.788	359.32	346.36	295.668	333.143
ENSG00000091831	ESR1	-1.07467	0.0960862	0.224682	49.7269	28.1009	21.461	22.7297	15.2767	24.7974	134.883	41.8177	45.7893	88.3031
ENSG00000091844	RGS17	-1.66559	1.45349e-06	2.18359e-05	80.4095	55.1611	80.6934	20.0022	37.237	95.6472	119.405	26.3633	121.669	66.2273
ENSG00000091879	ANGPT2	-2.08397	0.00498463	0.023091	239.112	148.831	225.77	66.3708	12.4123	29.2255	357.109	81.8172	91.5785	497.708
ENSG00000091947	TMEM101	0.0146308	0.932962	0.964896	761.774	910.678	699.629	594.61	950.02	679.272	706.478	766.355	879.154	702.411
ENSG00000091972	CD200	-1.01016	5.48278e-07	9.03604e-06	3137.03	3548	3032.01	1819.29	1960.19	3610.68	3701.55	1100.9	2480.47	3423.75
ENSG00000091986	CCDC80	-1.67838	0.0605205	0.161325	220.068	392.372	1144.3	125.468	52.5137	2621.44	958.555	1257.26	2989.39	2393.21
ENSG00000092010	PSME1	0.317998	0.00592539	0.026583	2210.2	2257.44	2543.56	2604.83	2580.81	2184.83	2085.16	3332.69	2192.65	2468.47
ENSG00000092020	PPP2R3C	0.545771	0.000534228	0.00364331	360.785	293.499	333.075	508.237	532.775	349.821	396.91	472.722	417.336	270.93
ENSG00000092036	HAUS4	-0.0621407	0.762317	0.865267	193.618	335.129	233.496	213.659	253.975	289.598	237.704	301.815	279.969	305.047
ENSG00000092051	JPH4	0.511138	0.0331849	0.102957	15307.4	11499.5	11967.5	25861.9	18510.6	15293.8	15078.2	13553.5	9307	16383.2
ENSG00000092054	MYH7	0.706832	0.0666323	0.172947	691.945	478.756	1026.69	1227.41	1384.45	769.605	639.037	1445.44	478.825	1713.88
ENSG00000092068	SLC7A8	-0.327555	0.0999481	0.23082	977.61	1205.22	1564.94	985.561	1288.97	1851.84	1380.89	1031.81	1320.04	1377.73
ENSG00000092094	OSGEP	0.397164	0.000713303	0.0046535	848.531	924.208	755.427	1164.67	931.879	767.834	770.603	1151.8	790.192	900.089
ENSG00000092096	SLC22A17	0.249454	0.122564	0.267271	12209.5	13065.9	10621.5	12772.3	18779.8	14953.7	14972	14644.4	11511.4	13340.8
ENSG00000092098	RNF31	0.145955	0.503936	0.680993	926.825	947.105	616.36	1184.67	673.13	760.749	721.957	713.628	713.004	737.531
ENSG00000092108	SCFD1	-0.196633	0.164816	0.32897	1359.55	1496.63	1622.45	1372.88	1244.1	1701.28	1880.63	1433.62	1517.59	1253.3
ENSG00000092140	G2E3	-0.211063	0.146581	0.302235	232.764	250.827	211.176	211.841	204.326	247.088	298.512	204.543	227.638	209.72
ENSG00000092148	HECTD1	-0.0190897	0.899693	0.946902	2743.44	2384.42	1963.25	2623.92	2387.94	2203.43	2195.72	1898.16	2702.88	2148.37
ENSG00000092199	HNRNPC	-0.0158181	0.891677	0.942148	8762.51	9034.97	8614.45	7680.83	9345.53	9882.65	9279.3	9078.98	7192.84	8812.25
ENSG00000092200	RPGRIP1	1.18099	0.0456454	0.130951	9.52217	11.4485	7.72596	19.093	27.689	4.42811	2.2112	11.818	14.3909	11.0379
ENSG00000092201	SUPT16H	-0.113581	0.300312	0.492826	3346.51	3232.65	2769.33	2866.67	2967.5	3291.86	3169.75	2578.15	2717.27	2707.29
ENSG00000092203	TOX4	0.0456911	0.554462	0.720606	1319.35	1316.58	1274.78	1387.42	1415	1471.02	1419.59	1339.98	1241.54	1317.52
ENSG00000092208	GEMIN2	0.541169	0.0101481	0.0411733	61.3651	92.629	92.7115	123.65	152.767	102.732	88.448	121.817	113.819	87.2996
ENSG00000092295	TGM1	-0.448214	0.407507	0.598794	51.8429	38.5087	21.461	48.187	23.8699	28.3399	16.584	15.4544	61.4884	61.2101
ENSG00000092330	TINF2	0.552064	1.29866e-09	3.71548e-08	794.572	836.783	805.217	1084.66	1205.91	683.7	754.019	1093.62	727.395	782.686
ENSG00000092421	SEMA6A	1.21085	0.00272434	0.01415	468.703	397.576	183.706	1084.66	583.379	263.03	573.806	847.263	175.307	473.626
ENSG00000092439	TRPM7	-0.191884	0.155365	0.315857	830.545	812.845	701.346	732.807	721.824	849.311	822.566	576.357	761.41	635.18
ENSG00000092445	TYRO3	-0.728507	0.25887	0.446749	47.6109	71.8135	30.0454	14.547	19.0959	136.386	28.7456	68.181	40.5562	38.1309
ENSG00000092470	WDR76	0.337662	0.0591348	0.158528	118.498	120.73	97.0037	164.563	124.123	127.53	121.616	133.635	96.8116	97.3341
ENSG00000092529	CAPN3	0.39884	0.366924	0.560933	22.2184	16.6524	16.3104	42.7319	33.4178	19.4837	25.4288	19.0907	23.5488	45.155
ENSG00000092531	SNAP23	0.185937	0.381826	0.574905	400.989	347.619	363.979	396.407	415.335	216.092	374.798	436.359	412.103	446.533
ENSG00000092607	TBX15	2.21118	0.0522627	0.144248	3.17406	4.1631	11.1597	16.3654	4.77397	3.54249	18.7952	146.362	1.30826	42.1446
ENSG00000092621	PHGDH	-1.46282	1.61264e-07	3.00739e-06	503.617	464.186	722.807	332.763	228.196	621.706	707.584	133.635	682.914	764.624
ENSG00000092758	COL9A3	-1.15903	0.226222	0.408582	142.833	64.528	15.4519	6.36433	28.6438	182.438	11.056	52.7267	27.4736	13.0448
ENSG00000092820	EZR	1.65091	0.0066459	0.029242	817.849	441.289	678.168	6465.25	2208.44	911.305	572.701	1349.98	2959.3	1068.67
ENSG00000092841	MYL6	0.527103	0.000404547	0.00290786	7995.45	8027.5	10970.9	11870.4	13565.7	7898.86	7853.08	13240.8	9165.7	10712.8
ENSG00000092847	AGO1	-0.133567	0.295045	0.487322	1391.3	1028.29	1146.02	1074.66	1173.44	1238.1	1250.43	957.262	1097.63	1051.61
ENSG00000092850	TEKT2	-0.909982	0.043053	0.125362	160.819	174.85	120.182	163.654	69.7	128.415	170.262	55.4539	375.472	138.475
ENSG00000092853	CLSPN	-0.279866	0.647771	0.790132	21.1604	15.6116	11.1597	30.0032	5.72877	30.9968	9.9504	9.0908	22.2405	16.0551
ENSG00000092871	RFFL	-0.789184	9.71963e-06	0.000116204	422.15	359.067	434.371	300.942	212.919	535.801	410.178	217.27	422.57	363.247
ENSG00000092929	UNC13D	-4.61786	2.77584e-168	5.23358e-164	4846.79	4552.35	4500.8	232.752	162.315	5528.05	3817.64	158.18	4216.54	4242.56
ENSG00000092931	MFSD11	0.110626	0.331506	0.52474	833.719	1024.12	815.518	1029.2	996.805	900.677	867.896	819.99	873.921	834.865
ENSG00000092964	DPYSL2	-0.0514631	0.831226	0.907639	2624.95	2469.76	3452.65	3794.05	2277.18	3591.2	3328.96	2226.34	2018.65	2575.84
ENSG00000092969	TGFB2	-0.474494	0.53441	0.704436	35.9727	13.5301	36.9129	13.6378	14.3219	12.3987	26.5344	62.7265	112.511	57.1963
ENSG00000092978	GPATCH2	0.191519	0.358773	0.552929	259.215	247.704	212.035	336.4	235.834	197.494	225.542	205.452	176.616	269.926
ENSG00000093000	NUP50	0.0520366	0.670255	0.803938	865.46	802.437	779.464	866.457	924.241	860.824	901.064	801.809	948.492	680.335
ENSG00000093009	CDC45	0.0609931	0.92251	0.959243	31.7406	34.3456	11.1597	45.4595	5.72877	16.8268	15.4784	16.3634	20.9322	21.0723
ENSG00000093010	COMT	-0.32199	0.04641	0.132317	1431.5	1704.79	1661.94	1177.4	1154.35	1336.4	1251.54	1441.8	1722.98	1898.52
ENSG00000093072	ADA2	0.796071	0.111236	0.249523	2854.54	1282.23	786.331	1939.3	1298.52	1158.39	687.683	2861.78	444.81	982.372
ENSG00000093144	ECHDC1	0.333628	0.0117371	0.0460926	551.228	650.484	552.835	806.451	629.209	582.739	612.502	691.81	486.675	501.722
ENSG00000093167	LRRFIP2	-0.256543	0.044433	0.128455	1081.3	911.719	1273.93	979.197	928.06	1107.91	1282.5	947.262	1058.39	1239.25
ENSG00000093183	SEC22C	-0.0475911	0.664875	0.801101	1871.64	2109.65	1802.72	2003.85	1902.9	1973.17	1849.67	1539.98	1777.93	1749
ENSG00000093217	XYLB	0.124212	0.674142	0.806552	45.4948	49.9572	38.6298	50.0054	62.0616	57.5654	42.0128	31.8178	34.0149	39.1343
ENSG00000094631	HDAC6	0.53044	0.110973	0.249269	4526.21	4197.44	2497.2	7020.76	3390.47	2558.56	2398.05	2778.15	2442.53	2687.22
ENSG00000094755	GABRP	-3.63647	0.0378343	0.113605	35.9727	3.12232	0.85844	0	16.2315	167.383	0	5.45448	414.72	7.02411
ENSG00000094804	CDC6	-0.186477	0.742782	0.852161	33.8566	31.2232	19.7441	28.1849	6.68356	18.5981	11.056	18.1816	14.3909	12.0413
ENSG00000094841	UPRT	-0.0397677	0.740592	0.850995	486.689	490.205	478.151	391.861	505.086	524.288	482.042	491.812	443.502	423.453
ENSG00000094880	CDC23	0.0763147	0.492342	0.670806	493.037	477.716	420.636	450.958	508.905	464.951	465.458	463.631	378.089	447.536
ENSG00000094914	AAAS	0.150285	0.507817	0.683836	1686.48	1766.19	1096.23	1879.29	1463.7	1190.28	987.301	1258.17	1602.62	1346.62
ENSG00000094916	CBX5	-0.0919954	0.633804	0.780569	4965.28	3540.72	5165.23	4723.24	5075.69	6724.53	5210.69	4007.23	4364.37	4361.97
ENSG00000094963	FMO2	-0.278711	0.815649	0.898367	53.959	169.646	18.8857	15.4562	8.59315	30.9968	7.7392	186.361	310.059	5.01722
ENSG00000094975	SUCO	-0.125135	0.6842	0.813921	3128.56	3538.63	3226.02	2498.45	2877.75	3043	2381.46	2010.89	2328.71	1150.95
ENSG00000095002	MSH2	-0.490846	0.0103658	0.0418523	693.003	698.36	631.812	545.514	405.788	944.958	716.429	520.903	601.802	539.853
ENSG00000095015	MAP3K1	-0.367453	0.134994	0.286457	209.488	170.687	251.523	162.745	185.23	338.308	190.163	217.27	302.209	238.82
ENSG00000095059	DHPS	0.426374	2.53461e-05	0.000269682	2391.12	2449.98	2429.39	3069.42	3279.72	2137.89	2251	2748.15	1976.79	2155.4
ENSG00000095066	HOOK2	0.516876	0.116156	0.257376	4578.05	3557.37	2325.51	7209.87	3466.86	2353.98	2450.01	2681.79	3397.56	3122.72
ENSG00000095139	ARCN1	-0.473429	4.27788e-05	0.000423387	4404.53	4680.36	5539.51	3766.77	3478.32	5798.17	4912.18	3469.05	4357.83	5011.2
ENSG00000095203	EPB41L4B	-0.059673	0.893231	0.942891	89.9316	122.811	191.432	193.657	279.755	175.353	217.803	76.3627	298.284	241.83
ENSG00000095209	TMEM38B	0.844236	0.00283094	0.0146035	352.32	528.714	639.538	1163.76	1061.73	588.938	736.329	1107.26	998.206	489.681
ENSG00000095261	PSMD5	0.439906	0.0963016	0.224944	527.952	492.286	662.716	521.875	896.552	719.125	343.842	717.264	523.306	402.381
ENSG00000095303	PTGS1	-0.65599	0.173618	0.341247	118.498	55.1611	156.236	62.7341	75.4287	86.7909	87.3424	124.544	264.269	198.682
ENSG00000095319	NUP188	0.100633	0.523383	0.696264	1222.01	1085.53	1022.4	1542.89	1000.62	1148.65	992.829	1032.72	1118.57	1193.09
ENSG00000095321	CRAT	-1.85666	4.03357e-14	2.34719e-12	685.596	1178.16	980.339	240.026	241.563	1152.19	770.603	269.088	999.514	576.98
ENSG00000095370	SH2D3C	-0.811911	0.185278	0.356599	425.324	261.234	280.71	98.1924	63.9712	159.412	318.413	449.086	260.345	798.741
ENSG00000095380	NANS	0.360594	0.0195967	0.068561	335.392	360.108	404.325	492.781	451.618	379.046	354.898	539.085	510.223	355.219
ENSG00000095383	TBC1D2	1.61797	9.10106e-12	3.80469e-10	108.976	93.6697	116.748	326.399	357.093	99.1896	118.299	418.177	192.315	111.382
ENSG00000095397	WHRN	0.344971	0.0165382	0.0600909	1564.81	1475.82	1698.85	2239.33	2143.51	1997.08	2107.27	2106.34	1614.4	1462.02
ENSG00000095464	PDE6C	-4.54766	0.000118556	0.00101272	35.9727	24.9786	562.278	14.547	0	6.19935	275.294	9.99988	336.224	100.344
ENSG00000095485	CWF19L1	0.12468	0.418693	0.609578	340.682	389.25	364.837	348.22	503.177	369.304	352.686	393.632	463.126	386.326
ENSG00000095539	SEMA4G	0.522406	0.113172	0.252634	504.675	452.737	337.367	855.547	425.838	284.285	300.723	291.815	330.991	345.185
ENSG00000095564	BTAF1	-0.483371	0.0260311	0.0851917	1054.85	1089.69	769.162	949.194	579.56	881.194	872.318	657.265	1306.96	1159.98
ENSG00000095574	IKZF5	-0.211838	0.331979	0.524919	358.669	300.784	477.293	304.578	404.833	530.487	532.899	386.359	382.013	377.295
ENSG00000095585	BLNK	-0.618508	0.21414	0.393717	40.2047	42.6718	76.4012	22.7297	38.1918	36.3105	19.9008	45.454	96.8116	69.2376
ENSG00000095587	TLL2	1.39302	0.0636543	0.167337	7.40613	26.0194	7.72596	140.924	18.1411	53.1373	49.752	65.4538	36.6314	19.0654
ENSG00000095596	CYP26A1	0.41096	0.808435	0.893624	1.05802	4.1631	0	0.909189	0.954794	23.0262	0	47.2722	43.1727	15.0517
ENSG00000095627	TDRD1	-0.0456971	0.973274	0.986009	0	1.04077	6.00908	0	0.954794	341.85	1.1056	7.27264	3.92479	5.01722
ENSG00000095637	SORBS1	-0.505694	0.167947	0.333423	253.925	156.116	252.381	274.575	105.027	294.912	174.685	116.362	179.232	331.137
ENSG00000095713	CRTAC1	2.25073	0.0109109	0.0435495	206.314	121.771	479.01	434.592	75.4287	58.451	489.781	2877.24	69.338	235.809
ENSG00000095739	BAMBI	-1.04533	0.220948	0.401984	136.484	368.434	56.6571	10.0011	14.3219	237.347	66.336	206.361	133.443	112.386
ENSG00000095752	IL11	-1.22737	0.0546705	0.149364	30.6826	47.8756	90.9947	57.2789	25.7794	54.9085	68.5472	43.6359	125.593	273.94
ENSG00000095777	MYO3A	-0.192335	0.899834	0.946945	0	2.08155	3.43376	1.81838	0.954794	5.31373	139.306	1.81816	0	0
ENSG00000095787	WAC	0.0914523	0.531005	0.702014	3005.83	2978.7	2811.39	3157.61	3166.1	3199.75	3877.34	3238.14	2481.78	2584.87
ENSG00000095794	CREM	0.532409	0.021797	0.0745035	282.491	309.11	367.412	412.772	519.408	356.906	334.997	673.629	412.103	527.812
ENSG00000095906	NUBP2	0.487873	7.89677e-08	1.59236e-06	1273.86	1382.15	1438.75	1706.55	2123.46	1366.51	1408.53	1993.61	1466.56	1353.65
ENSG00000095932	SMIM24	-3.21087	0.025791	0.0846117	2.11604	1.04077	2.57532	7.27351	3.81918	4.42811	5.528	1.81816	128.21	135.465
ENSG00000095951	HIVEP1	-0.291966	0.133659	0.284394	539.59	520.387	560.561	313.67	422.974	566.798	574.912	586.357	435.652	579.991
ENSG00000095970	TREM2	-1.45086	0.0112943	0.0447828	85.6996	62.4465	194.007	17.2746	88.7959	87.6766	106.138	53.6357	240.721	241.83
ENSG00000096060	FKBP5	1.07025	0.0112059	0.0444752	3981.33	3426.23	6151.58	7232.6	13125.6	4978.97	2660.07	3233.6	2340.49	2675.18
ENSG00000096063	SRPK1	-0.564115	2.22477e-06	3.18979e-05	600.955	684.83	596.616	431.865	400.059	535.801	591.496	363.632	600.494	515.77
ENSG00000096070	BRPF3	0.144748	0.416036	0.606929	1966.86	1617.36	2005.32	1841.11	2221.81	2175.97	2293.01	2156.34	1352.75	1711.88
ENSG00000096080	MRPS18A	0.183024	0.0995322	0.230369	388.293	445.452	419.777	476.415	522.272	476.465	495.309	506.358	400.329	465.598
ENSG00000096092	TMEM14A	-0.382418	0.000520559	0.00357285	1183.92	1461.25	1595.84	984.652	1082.74	1277.07	1344.41	1055.44	1316.11	1316.52
ENSG00000096093	EFHC1	0.0343479	0.852588	0.920139	1127.85	1040.77	1104.81	1448.34	1266.06	1137.14	1323.4	1192.71	1767.47	1404.82
ENSG00000096384	HSP90AB1	-0.217708	0.168405	0.33394	48559.9	38009.1	38140.5	32735.4	36867.5	52704.2	49538.6	42365	37570.7	39288.8
ENSG00000096401	CDC5L	0.245687	0.0470849	0.133711	905.664	999.144	958.019	1335.6	1140.98	1134.48	1139.87	1078.17	892.237	964.31
ENSG00000096433	ITPR3	0.0696265	0.921738	0.959076	88.8736	47.8756	59.2324	55.4605	26.7342	57.5654	53.0688	234.543	238.104	160.551
ENSG00000096654	ZNF184	0.303037	0.0924276	0.218401	92.0477	96.7921	87.5609	110.921	106.937	119.559	92.8704	130.908	86.3455	83.2859
ENSG00000096696	DSP	-1.86182	0.000521752	0.00357843	3140.2	2941.23	3480.97	102.738	1397.82	1922.68	2748.52	750.9	2820.62	2039
ENSG00000096717	SIRT1	0.0690932	0.659586	0.797778	544.88	521.428	498.754	512.783	653.079	587.167	679.944	529.085	476.208	460.581
ENSG00000096746	HNRNPH3	-0.129878	0.31095	0.503362	4550.54	4842.73	4028.66	3738.59	4144.76	4740.73	4675.58	3907.23	3627.82	3634.47
ENSG00000096872	IFT74	-0.0331767	0.844976	0.915544	370.307	379.883	475.576	387.315	497.448	466.723	443.346	448.177	588.719	459.577
ENSG00000096968	JAK2	1.35719	3.54059e-06	4.76731e-05	228.532	234.174	330.499	1206.49	538.504	278.971	295.195	567.266	378.089	361.24
ENSG00000096996	IL12RB1	-0.668362	0.181055	0.350978	12.6962	45.7941	26.6116	12.7287	14.3219	15.0556	16.584	20.9088	31.3984	30.1033
ENSG00000097007	ABL1	0.43321	0.00169439	0.00951624	1940.41	1872.35	1647.35	2481.18	2495.83	1883.72	1803.23	2553.61	1512.35	2352.07
ENSG00000097021	ACOT7	-0.782176	0.0281421	0.0905911	2168.94	1824.48	2477.46	2068.41	503.177	2471.77	2883.4	1428.17	1707.29	2516.64
ENSG00000097033	SH3GLB1	-0.250784	0.0768753	0.191898	1605.02	1415.45	1995.01	1416.52	1518.12	1985.56	2107.27	1613.62	1741.3	1776.1
ENSG00000097046	CDC7	0.497202	0.276688	0.467484	142.833	103.037	54.9402	232.752	100.253	184.209	63.0192	121.817	139.984	64.2204
ENSG00000097096	SYDE2	0.879269	0.000209429	0.00166116	121.672	68.6911	73.8259	189.111	165.179	131.072	92.8704	186.361	104.661	93.3203
ENSG00000099139	PCSK5	0.712359	0.184301	0.355206	122.73	125.934	66.0999	397.316	75.4287	104.503	106.138	220.907	160.917	302.037
ENSG00000099194	SCD	2.14744	4.16626e-05	0.000414297	1142.66	2572.8	4149.7	18863.9	2418.49	2702.03	1615.28	10202.6	2557.66	1841.32
ENSG00000099203	TMED1	0.0703688	0.656023	0.795566	986.074	1036.61	789.765	861.911	936.653	764.292	651.198	894.535	922.327	835.869
ENSG00000099204	ABLIM1	-1.53887	8.38076e-21	9.69392e-19	3410	2949.56	3141.89	1280.14	1334.8	3932.16	4831.47	1222.71	3629.13	4125.16
ENSG00000099219	ERMP1	-0.24028	0.195748	0.370237	1059.08	902.352	855.865	739.171	659.763	842.226	673.31	656.356	733.937	597.049
ENSG00000099246	RAB18	0.46587	0.00195654	0.0107359	1902.32	2100.28	2231.09	3308.54	2806.14	2504.54	2594.84	2791.79	1749.15	1961.73
ENSG00000099250	NRP1	-0.811173	0.231707	0.414837	1081.3	597.405	562.278	342.764	143.219	811.23	771.709	1356.35	651.516	3067.53
ENSG00000099251	HSD17B7P2	0.318916	0.493458	0.671472	46.5528	21.8563	29.187	32.7308	64.926	61.1079	58.5968	49.9994	41.8645	17.0585
ENSG00000099256	PRTFDC1	1.56685	0.00446355	0.0211553	122.73	220.644	85.844	456.413	538.504	418.013	85.1312	599.993	62.7967	259.892
ENSG00000099260	PALMD	-0.455812	0.420922	0.611759	176.689	54.1203	144.218	32.7308	84.0219	155.869	134.883	232.725	191.007	261.899
ENSG00000099282	TSPAN15	-0.228596	0.548576	0.715719	169.283	152.994	247.231	180.019	266.388	206.35	225.542	213.634	272.119	530.822
ENSG00000099284	H2AFY2	0.0636989	0.706471	0.829326	1127.85	1235.4	1045.58	1141.03	1216.41	1440.02	1044.79	1083.62	884.387	901.093
ENSG00000099290	WASHC2A	-0.21731	0.185708	0.357279	991.364	1269.75	1048.16	861.002	928.06	1077.8	847.995	764.537	804.583	884.034
ENSG00000099308	MAST3	0.360088	0.133985	0.284829	1181.81	788.907	1149.45	1641.09	948.111	1174.33	1257.07	1658.16	820.282	1348.63
ENSG00000099326	MZF1	0.205464	0.195508	0.370024	2739.21	2559.27	2013.04	3345.82	2468.14	2266.31	2134.91	2197.25	2218.82	2280.83
ENSG00000099330	OCEL1	0.579143	0.0353338	0.107867	112.15	220.644	234.354	216.387	344.681	238.232	223.331	366.359	176.616	241.83
ENSG00000099331	MYO9B	-4.23723e-05	0.999842	0.999944	1265.39	862.802	1040.43	1366.51	903.235	1014.04	992.829	1129.99	1170.9	1587.45
ENSG00000099337	KCNK6	-0.0379748	0.945868	0.971583	71.9453	96.7921	73.8259	37.2768	52.5137	24.7974	39.8016	135.453	136.06	97.3341
ENSG00000099338	CATSPERG	0.31883	0.250085	0.437069	43.3788	49.9572	39.4882	59.0973	45.8301	26.5687	38.696	41.8177	44.481	33.1137
ENSG00000099341	PSMD8	0.109141	0.205994	0.383638	2146.72	2474.96	2550.43	2303.89	2583.67	2300.85	2178.03	2599.06	2220.13	2319.96
ENSG00000099364	FBXL19	0.221468	0.22253	0.403991	892.968	841.987	674.734	1100.12	812.53	674.844	646.776	673.629	693.38	751.58
ENSG00000099365	STX1B	-1.60411	1.14696e-06	1.77543e-05	843.241	1092.81	734.825	186.384	177.592	751.007	500.837	328.178	409.487	576.98
ENSG00000099377	HSD3B7	1.52521	0.00710299	0.0308998	19.0443	67.6504	36.9129	44.5503	67.7904	35.4249	23.2176	154.544	19.624	14.0482
ENSG00000099381	SETD1A	0.310253	0.0361637	0.109778	1781.7	1610.08	1380.37	2042.95	1642.25	1447.11	1603.12	1893.61	1148.66	1526.24
ENSG00000099385	BCL7C	0.409657	0.00288195	0.0147975	541.706	635.913	672.159	684.62	918.512	524.288	570.49	788.173	580.87	673.311
ENSG00000099617	EFNA2	-0.214681	0.752167	0.857968	9.52217	33.3048	8.5844	20.0022	17.1863	16.8268	21.0064	3.63632	14.3909	7.02411
ENSG00000099622	CIRBP	0.415376	0.00128266	0.0075361	30414.9	33060.2	25657.1	39046	38790.4	24033.1	30624	33881.4	24908.1	26763.9
ENSG00000099624	ATP5F1D	0.926577	4.14178e-06	5.45315e-05	1029.45	1891.09	2053.39	2984.87	3146.05	1373.6	1584.32	2850.88	1516.28	1576.41
ENSG00000099625	CBARP	0.613566	0.263889	0.453047	139.659	249.786	266.975	179.11	159.451	292.255	233.282	972.716	397.713	420.443
ENSG00000099715	PCDH11Y	-3.42371	0.0408648	0.120385	236.996	4.1631	510.772	13.6378	8.59315	4.42811	0	8.18172	3.92479	1.00344
ENSG00000099725	PRKY	-7.32068	1.57629e-05	0.000177254	113.208	62.4465	24.0363	0	0	0.885622	1.1056	0.90908	70.6463	98.3375
ENSG00000099769	IGFALS	-0.61336	0.159376	0.321652	22.2184	27.0601	14.5935	14.547	9.54794	23.0262	27.64	19.0907	28.7818	12.0413
ENSG00000099783	HNRNPM	-0.0469505	0.610705	0.763275	7224.16	6554.8	7542.26	6925.3	7324.23	7580.92	7656.28	6463.56	7105.19	6263.5
ENSG00000099785	2022-03-02	0.254839	0.100063	0.230917	572.388	665.055	828.395	692.802	890.823	694.327	770.603	927.262	624.042	752.583
ENSG00000099795	NDUFB7	0.424305	0.0309374	0.0978353	1807.1	2432.29	2310.06	1905.66	3387.61	1835.01	1855.2	2628.15	1766.16	1766.06
ENSG00000099797	TECR	0.664244	1.04776e-07	2.05347e-06	2568.87	2946.43	3377.1	4788.7	4141.9	2938.49	2367.09	4737.22	3045.64	2878.88
ENSG00000099800	TIMM13	-0.13877	0.31486	0.507339	2008.12	1844.25	1712.59	1283.78	1781.65	1651.68	1627.44	1569.07	1560.76	1499.15
ENSG00000099804	CDC34	0.437748	0.000452812	0.00318794	952.217	990.818	1044.72	1309.23	1593.55	1003.41	1051.43	1403.62	1064.93	1310.5
ENSG00000099810	MTAP	-0.399992	0.0870485	0.209419	136.484	209.196	156.236	109.103	111.711	183.324	120.51	162.725	185.774	189.651
ENSG00000099812	MISP	1.77487	2.10485e-11	8.3547e-10	585.085	274.765	560.561	1877.48	1590.69	631.448	562.75	2141.79	733.937	477.639
ENSG00000099814	CEP170B	0.392596	0.0314962	0.0989221	3117.98	2721.63	1940.93	3693.13	2639.05	2075.9	2235.52	2942.69	2139.01	2255.74
ENSG00000099817	POLR2E	-0.0646172	0.485437	0.665245	3515.8	3312.79	4125.66	3155.8	3455.4	3283.89	3437.31	3429.05	3409.34	3411.71
ENSG00000099821	POLRMT	-0.165713	0.359275	0.553322	2238.77	2005.57	1548.63	2212.06	1402.59	1759.73	1750.16	1511.8	2165.18	1952.7
ENSG00000099822	HCN2	0.404269	0.132444	0.28251	524.778	810.764	939.992	943.739	619.661	653.589	899.958	1408.17	698.613	711.442
ENSG00000099834	CDHR5	1.21371	0.031921	0.0998901	19.0443	11.4485	6.86752	50.9146	9.54794	11.5131	12.1616	30.9087	19.624	12.0413
ENSG00000099840	IZUMO4	1.42683	NA	NA	356.552	278.928	211.176	1283.78	295.986	165.611	183.53	334.542	269.503	196.675
ENSG00000099849	RASSF7	1.0796	0.00484399	0.0225837	715.221	613.016	375.138	1608.36	739.011	372.847	329.469	598.175	561.246	285.982
ENSG00000099860	GADD45B	-0.260107	0.568982	0.731759	325.87	380.924	469.567	150.925	136.536	167.383	161.418	430.904	206.706	295.013
ENSG00000099864	PALM	-0.256613	0.0723463	0.183558	2512.8	3112.96	2279.16	2072.04	1763.5	2432.8	2224.47	2280.88	2184.8	2302.9
ENSG00000099866	MADCAM1	0.496082	0.365531	0.559666	159.761	194.625	74.6843	342.764	161.36	77.0491	129.355	48.1813	83.729	194.668
ENSG00000099875	MKNK2	1.85718	2.15705e-21	2.62628e-19	1657.92	1025.16	1300.54	4253.19	6329.33	1253.15	1388.63	3941.77	1236.31	1492.12
ENSG00000099889	ARVCF	0.270381	0.284422	0.476031	1726.69	1211.46	927.974	1944.76	1195.4	1192.05	850.206	1148.17	1163.05	1225.21
ENSG00000099899	TRMT2A	0.229331	0.293963	0.486088	1968.97	1835.93	1111.68	2313.89	1677.57	1350.57	1318.98	1479.07	1592.16	1711.88
ENSG00000099901	RANBP1	0.0993325	0.371187	0.564931	1418.8	1588.22	1682.54	1722	1673.75	1703.94	1674.98	1571.8	1316.11	1429.91
ENSG00000099904	ZDHHC8	-0.65402	2.55818e-06	3.60209e-05	2645.05	2631.08	2084.29	1663.82	1340.53	2014.79	2249.9	1430.89	2060.52	2599.92
ENSG00000099910	KLHL22	0.0904319	0.392312	0.584438	965.972	947.105	887.627	875.549	1015.9	871.452	903.275	959.08	740.478	927.182
ENSG00000099917	MED15	0.160692	0.142142	0.296127	1867.4	1675.65	1676.53	2140.23	1881.9	1680.02	1782.23	1858.16	1541.14	2050.04
ENSG00000099940	SNAP29	-0.211107	0.269833	0.459679	626.347	579.712	897.07	566.425	707.502	810.344	747.385	523.63	561.246	629.159
ENSG00000099942	CRKL	0.086425	0.649418	0.791221	979.726	739.991	1140.87	940.102	1229.77	1169.02	1076.85	993.625	757.485	1084.72
ENSG00000099949	LZTR1	-0.444769	0.123808	0.269236	4293.44	2761.18	2105.75	2983.05	1880.94	3164.33	2003.35	1475.44	2521.03	3284.27
ENSG00000099953	MMP11	-1.57406	0.092777	0.218918	119.556	16.6524	35.196	30.0032	6.68356	18.5981	51.9632	59.9993	75.8794	354.216
ENSG00000099954	CECR2	3.58089	2.00515e-16	1.54939e-14	41.2627	40.5902	12.0182	454.595	207.19	39.853	21.0064	389.086	15.6992	34.1171
ENSG00000099956	SMARCB1	0.175271	0.159679	0.322057	2772.01	2820.5	3178.8	3206.71	3728.47	3135.99	3099	2947.24	2366.65	3042.44
ENSG00000099957	P2RX6	0.69054	0.0641858	0.168288	833.719	603.649	307.322	756.446	937.608	531.373	296.301	656.356	255.112	569.956
ENSG00000099958	DERL3	0.242463	0.698514	0.823626	56.075	69.7319	59.2324	151.835	22.9151	56.6798	32.0624	99.9988	74.5711	193.665
ENSG00000099960	SLC7A4	1.02422	7.78998e-09	1.9124e-07	223.242	205.033	217.185	460.959	463.075	156.755	183.53	344.541	228.946	241.83
ENSG00000099968	BCL2L13	0.457282	0.00850588	0.0358208	989.248	911.719	1249.03	1167.4	1564.91	1216.84	1259.28	1856.34	1038.76	1131.88
ENSG00000099974	DDTL	-0.219662	0.459303	0.645716	58.1911	57.2426	38.6298	53.6422	50.6041	86.7909	46.4352	42.7268	62.7967	49.1688
ENSG00000099977	DDT	0.127112	0.604111	0.758216	305.768	417.351	268.692	232.752	352.319	254.173	297.406	354.541	196.24	266.916
ENSG00000099984	GSTT2	-2.20058	0.112394	0.251225	4.23208	70.7727	29.187	14.547	1.90959	6.19935	0	9.99988	170.074	4.01378
ENSG00000099985	OSM	-1.69465	0.110208	0.247925	12.6962	10.4077	57.5155	4.54595	3.81918	11.5131	1.1056	6.36356	1.30826	16.0551
ENSG00000099991	CABIN1	-0.518655	0.0105784	0.0425619	3483	3053.63	2553	2525.73	1540.08	2806.54	2548.41	1760.89	2057.9	2974.21
ENSG00000099992	TBC1D10A	-0.551379	0.00225348	0.0120565	507.849	432.962	527.082	322.762	285.483	342.736	383.643	317.269	416.028	553.901
ENSG00000099994	SUSD2	-1.0144	0.256953	0.444426	108.976	74.9358	49.7895	40.9135	19.0959	40.7386	119.405	154.544	40.5562	576.98
ENSG00000099995	SF3A1	-0.0244247	0.857266	0.922118	3407.88	3033.86	3550.51	3243.08	3229.11	3734.67	3370.97	3034.51	2476.55	2981.23
ENSG00000099998	GGT5	-0.42245	0.665405	0.801479	907.78	779.54	379.431	98.1924	64.926	153.213	413.494	1738.16	317.908	2994.28
ENSG00000099999	RNF215	-0.764854	4.63154e-06	5.99334e-05	366.075	399.658	361.403	266.392	182.366	323.252	318.413	209.998	426.494	419.44
ENSG00000100003	SEC14L2	0.0243528	0.945252	0.971131	314.232	216.481	286.719	412.772	141.31	300.226	185.741	280.906	410.795	202.696
ENSG00000100012	SEC14L3	-1.21474	0.590645	0.748741	2.11604	4.1631	0	0.909189	0	3.54249	0	0.90908	643.666	0
ENSG00000100014	SPECC1L	-0.0617635	0.565756	0.729002	1630.41	1390.48	1600.13	1630.18	1551.54	1479.87	1721.42	1289.98	1490.11	1577.41
ENSG00000100023	PPIL2	0.416312	0.00598692	0.0268245	1155.36	1217.71	967.462	1789.28	1370.13	1008.72	1002.78	1155.44	1126.42	1067.66
ENSG00000100024	UPB1	-0.759711	0.322864	0.51526	30.6826	17.6932	7.72596	11.8195	2.86438	7.08497	11.056	19.0907	14.3909	45.155
ENSG00000100027	YPEL1	0.585684	0.081869	0.200697	167.167	338.252	148.51	365.494	307.444	261.258	212.275	227.27	136.06	135.465
ENSG00000100028	SNRPD3	0.465354	0.000285367	0.00218179	1361.67	1364.46	1598.42	1765.65	2302.01	1638.4	1597.59	2105.43	1586.93	1284.41
ENSG00000100029	PES1	-0.121688	0.117298	0.259164	1575.39	1391.52	1586.4	1450.16	1302.34	1450.65	1556.68	1416.35	1444.32	1577.41
ENSG00000100030	MAPK1	-0.344238	0.0594036	0.159041	3888.22	3594.84	3753.96	3806.78	2739.3	4769.96	3908.3	2358.15	3169.93	3288.29
ENSG00000100031	GGT1	0.021323	0.952141	0.975019	130.136	93.6697	53.2233	138.197	69.7	69.0785	81.8144	83.6354	116.436	127.437
ENSG00000100034	PPM1F	-0.291007	0.221674	0.402994	1047.44	1035.57	749.418	786.449	590.063	613.736	684.366	797.263	871.304	1205.14
ENSG00000100036	SLC35E4	-1.04463	2.23119e-05	0.000240933	358.669	490.205	297.02	121.831	196.688	348.935	309.568	167.271	283.893	248.854
ENSG00000100038	TOP3B	0.00683308	0.986604	0.991918	35.9727	42.6718	17.1688	40.0043	17.1863	27.4543	26.5344	27.2724	24.857	22.0758
ENSG00000100055	CYTH4	0.113954	0.816644	0.899043	117.44	151.953	158.811	74.5535	143.219	80.5916	103.926	301.815	208.014	300.03
ENSG00000100056	ESS2	0.0548434	0.705189	0.828633	683.48	742.072	523.648	665.527	605.34	581.854	591.496	601.811	503.682	579.991
ENSG00000100058	CRYBB2P1	0.630848	0.0165742	0.0601934	307.884	274.765	536.525	435.502	529.911	301.997	242.126	521.812	240.721	334.147
ENSG00000100060	MFNG	-0.358376	0.459361	0.64575	141.775	126.975	139.067	51.8238	51.5589	69.9641	92.8704	205.452	184.465	169.582
ENSG00000100065	CARD10	-1.1951	0.0271821	0.0881477	347.03	268.52	167.396	52.733	33.4178	109.817	163.629	208.179	264.269	252.868
ENSG00000100068	LRP5L	-1.07289	0.0136634	0.0518123	40.2047	73.895	31.7623	31.8216	10.5027	41.6242	38.696	22.727	61.4884	33.1137
ENSG00000100075	SLC25A1	0.573288	0.00125195	0.00739948	2525.49	3181.65	2386.46	3523.11	3728.47	2194.57	2001.14	3091.78	1868.2	2061.07
ENSG00000100077	GRK3	0.488173	0.11749	0.25938	662.32	391.331	469.567	1131.94	485.99	570.34	490.886	443.631	443.502	401.378
ENSG00000100079	LGALS2	-2.94601	3.24916e-06	4.42628e-05	45.4948	150.912	75.5427	9.09189	5.72877	168.268	59.7024	17.2725	34.0149	43.1481
ENSG00000100083	GGA1	0.0178778	0.854523	0.920901	2497.98	2464.55	2180.44	2689.38	2232.31	2264.53	2269.8	2311.79	2347.03	2648.09
ENSG00000100084	HIRA	0.512222	0.00239554	0.0126884	543.822	514.143	549.402	830.09	828.761	530.487	535.11	545.448	401.637	528.815
ENSG00000100092	SH3BP1	-0.718633	0.0295508	0.0942884	153.413	164.442	205.167	106.375	73.5192	143.471	164.734	176.362	255.112	282.971
ENSG00000100095	SEZ6L	-2.59446	0.000236159	0.00184294	4499.76	17020.8	9357.86	4776.88	513.679	15303.5	8426.88	246.361	13281.5	10139.8
ENSG00000100097	LGALS1	0.398239	0.577165	0.738442	783.992	614.057	1155.46	250.027	778.157	540.229	672.205	3568.14	1300.42	3071.54
[truncated: 17,116 more rows]
