# Supplementary material for: The diverging role of O-GlcNAc Transferase in corticotroph and somatotroph adenomas
Source: Research Square preprint supplement (doi:10.21203/rs.3.rs-4350199/v1), 2024-05-10
Supplement: Supplementary file 6 [file 58d7fbb943944176c67f9b6d.xlsx]

## Sheet: Correlation OGTwGene GO gona No
ID	Term	Nr. Genes	% Associated Genes	Term PValue	Term PValue Corrected with Bonferroni step down	Associated Genes Found
GO:0015278	calcium-release channel activity	3	6	0.00395009	0.00395009	[AKAP6, HTT, TRDN]
GO:0051281	positive regulation of release of sequestered calcium ion into cytosol	4	8.88889	0.000189044	0.000378087	[AKAP6, CX3CL1, HTT, TRDN]
GO:1904427	positive regulation of calcium ion transmembrane transport	6	6	4.25083e-05	0.000127525	[AKAP6, CACNA2D1, CX3CL1, HSPA2, HTT, TRDN]
