# Supplementary material for: The diverging role of O-GlcNAc Transferase in corticotroph and somatotroph adenomas
Source: Research Square preprint supplement (doi:10.21203/rs.3.rs-4350199/v1), 2024-05-10
Supplement: Supplementary file 7 [file 82bc474c388cbeea921ee0cf.xlsx]

## Sheet: Sheet1
ID	Term	Nr. Genes	% Associated Genes	Term PValue	Associated Genes Found
GO:0099537	trans-synaptic signaling	79	10.0254	1.44551e-10	[ADORA1, AGT, AKAP12, APBA2, ASIC2, CACNA1B, CACNG4, CACNG5, CADPS2, CALB2, CAMK2A, CASK, CBLN1, CDH1, CHRNA5, CHRNE, CNR1, CPLX2, CRHR2, CUX2, DBH, DCC, FABP5, GHSR, GJD2, GLRB, GRIA3, GRIN1, GRIN2B, GRM2, HAP1, HCRTR1, HRH2, HRH3, HTR1E, HTR5A, JPH3, KCNC4, KCND2, KCNQ3, LAMA2, LRFN2, LRRTM2, LYPD1, LYPD6, MB, MCTP1, MYLK2, NAPSA, NPTX1, NPTX2, NRG3, NRXN2, NTNG1, NTNG2, NTRK2, OPRK1, PCDHA6, P…
GO:0098660	inorganic ion transmembrane transport	89	8.67446	1.89058e-08	[ADAMTS8, ADCYAP1R1, ANO9, ASIC2, ASPG, ATP2B3, ATP4A, ATP6V1C2, CABP1, CACNA1B, CACNA2D2, CACNA2D3, CACNA2D4, CACNG4, CACNG5, CACNG6, CAV1, CLCNKA, CLIC6, CLU, CNR1, CRISP1, DHRS7C, DPP10, DPP6, FGF2, FXYD1, FXYD3, G6PD, GAL, GLRB, GRIN1, GRIN2B, GRM2, HAP1, HPCAL4, JPH2, JPH3, KCNA2, KCNA3, KCNC4, KCND1, KCND2, KCNF1, KCNG3, KCNIP1, KCNJ12, KCNJ4, KCNJ6, KCNJ9, KCNK1, KCNK10, KCNK12, KCNQ3, KCN…
GO:0098655	cation transmembrane transport	99	9.25234	7.12119e-11	[ADCYAP1R1, AGT, ASIC2, ASPG, ATP2B3, ATP4A, ATP6V1C2, CABP1, CACNA1B, CACNA2D2, CACNA2D3, CACNA2D4, CACNG4, CACNG5, CACNG6, CAV1, CHRNA5, CHRNE, CLU, CNGA1, CNGA4, CNR1, CRISP1, DAPK1, DHRS7C, DPP10, DPP6, FGF2, FXYD1, G6PD, GAL, GRIA3, GRIN1, GRIN2B, GRM2, HAP1, HPCAL4, JPH2, JPH3, KCNA2, KCNA3, KCNC4, KCND1, KCND2, KCNF1, KCNG3, KCNIP1, KCNJ12, KCNJ4, KCNJ6, KCNJ9, KCNK1, KCNK10, KCNK12, KCNQ3…
GO:0051049	regulation of transport	150	8.05585	2.6721e-11	[ABCA12, ADCY5, ADCYAP1R1, ADORA1, ADRA2B, AGT, ANO9, APBA2, ASIC2, BAG3, BMP2, BMP6, CABP1, CACNA1B, CACNA2D2, CACNA2D3, CACNA2D4, CACNG4, CACNG5, CACNG6, CADPS2, CAMK2A, CASK, CAV1, CDH1, CETP, CHRNA5, CLCNKA, CLIC6, CLU, CNR1, CPLX2, CXCR4, CYP8B1, DAPK1, DBI, DHRS7C, DISP3, DPP10, DPP6, EHD4, ERBB3, EXPH5, FABP5, FERMT1, FFAR4, FRMD4A, FXYD1, FXYD3, FXYD7, FZD9, G6PD, GAL, GAS1, GH1, GHRHR, G…
GO:0043269	regulation of ion transport	84	11.3055	5.56741e-14	[ADCYAP1R1, ADORA1, AGT, ANO9, ASIC2, CABP1, CACNA1B, CACNA2D2, CACNA2D3, CACNA2D4, CACNG4, CACNG5, CACNG6, CAMK2A, CASK, CAV1, CLCNKA, CLIC6, CNR1, CXCR4, DAPK1, DHRS7C, DPP10, DPP6, FXYD1, FXYD3, FXYD7, G6PD, GAL, GRIN1, GRIN2B, GRM2, HAP1, HRH3, JPH2, JPH3, KCNA2, KCNA3, KCNC4, KCND1, KCND2, KCNF1, KCNG3, KCNIP1, KCNJ12, KCNJ4, KCNJ6, KCNJ9, KCNK10, KCNK12, KCNQ3, KCNQ5, KCNV1, LOC102724428, L…
GO:0034765	regulation of ion transmembrane transport	61	11.5094	9.02785e-11	[ADCYAP1R1, AGT, ANO9, ASIC2, CABP1, CACNA1B, CACNA2D2, CACNA2D3, CACNA2D4, CACNG4, CACNG5, CACNG6, CAV1, CLCNKA, CLIC6, DAPK1, DHRS7C, DPP10, DPP6, FXYD1, G6PD, GAL, GRIN1, GRIN2B, HAP1, JPH2, JPH3, KCNA2, KCNA3, KCNC4, KCND1, KCND2, KCNF1, KCNG3, KCNIP1, KCNJ12, KCNJ4, KCNJ6, KCNJ9, KCNK10, KCNK12, KCNQ3, KCNQ5, KCNV1, LRRC52, OPRK1, PDE4B, PIRT, RASGRF1, RGS2, SCN7A, SHANK1, SHISA7, SHISA9, SL…
GO:0034762	regulation of transmembrane transport	70	11.254	1.10856e-11	[ADCYAP1R1, AGT, ANO9, ASIC2, CABP1, CACNA1B, CACNA2D2, CACNA2D3, CACNA2D4, CACNG4, CACNG5, CACNG6, CAV1, CLCNKA, CLIC6, DAPK1, DHRS7C, DPP10, DPP6, FABP5, FFAR4, FXYD1, G6PD, GAL, GH1, GRIN1, GRIN2B, HAP1, INSR, JPH2, JPH3, KCNA2, KCNA3, KCNC4, KCND1, KCND2, KCNF1, KCNG3, KCNIP1, KCNJ12, KCNJ4, KCNJ6, KCNJ9, KCNK10, KCNK12, KCNQ3, KCNQ5, KCNV1, KLF15, LRRC52, OCLN, OPRK1, PDE4B, PIRT, PTH, RASGR…
GO:0034220	ion transmembrane transport	117	8.87709	1.73195e-11	[ADAMTS8, ADCYAP1R1, AGT, ANO9, ASIC2, ASPG, ATP2B3, ATP4A, ATP6V1C2, CABP1, CACNA1B, CACNA2D2, CACNA2D3, CACNA2D4, CACNG4, CACNG5, CACNG6, CAV1, CHRNA5, CHRNE, CLCNKA, CLIC6, CLU, CNGA1, CNGA4, CNR1, CRISP1, DAPK1, DHRS7C, DPP10, DPP6, FGF2, FOLR2, FXYD1, FXYD3, FXYD7, G6PD, GAL, GLRB, GRIA3, GRIN1, GRIN2B, GRM2, HAP1, HPCAL4, JPH2, JPH3, KCNA2, KCNA3, KCNC4, KCND1, KCND2, KCNF1, KCNG3, KCNIP1, …
GO:0023061	signal release	51	10	3.51453e-07	[ABCA12, ADCY5, ADM, ADORA1, ADRA2B, AGT, APBA2, BMP6, CADPS2, CAMK2A, CASK, CHRNA5, CLU, CNR1, CPLX2, FAM3B, FFAR4, GAL, GHRHR, GHSR, GPR68, GRM2, HRH3, INHBB, ISL1, KCNA2, MAFA, MC4R, MCTP1, MYRIP, NAPSA, NEUROD1, NMB, NRXN2, OPRK1, POMC, PRRT2, RASL10B, RBP4, RPH3A, SMPD3, SREBF1, SSTR5, STX11, SYK, SYT10, SYT17, SYT7, TUNAR, UCN3, VAMP8]
GO:0022857	transmembrane transporter activity	120	8.3682	3.99159e-10	[ABCA12, ADAMTS8, ANO9, ASIC2, ASPG, ATP2B3, ATP4A, ATP6V1C2, AZGP1, CABP1, CACNA1B, CACNA2D2, CACNA2D3, CACNA2D4, CACNG4, CACNG5, CACNG6, CAV1, CHRNA5, CHRNE, CLCNKA, CLIC6, CLU, CNGA1, CNGA4, CNNM1, CNR1, CRISP1, CYB561D2, DAPK1, DPP10, DPP6, FLVCR2, FXYD1, FXYD3, FXYD7, GAL, GJB2, GJD2, GLRB, GRIA3, GRIN1, GRIN2B, GRM2, HAP1, HPCAL4, JPH2, JPH3, KCNA2, KCNA3, KCNC4, KCND1, KCND2, KCNF1, KCNG3,…
GO:0022803	passive transmembrane transporter activity	84	11.1702	1.01919e-13	[ANO9, ASIC2, ASPG, CABP1, CACNA1B, CACNA2D2, CACNA2D3, CACNA2D4, CACNG4, CACNG5, CACNG6, CAV1, CHRNA5, CHRNE, CLCNKA, CLIC6, CLU, CNGA1, CNGA4, CNR1, CRISP1, DAPK1, DPP10, DPP6, FXYD1, FXYD3, FXYD7, GAL, GJB2, GJD2, GLRB, GRIA3, GRIN1, GRIN2B, GRM2, HAP1, HPCAL4, JPH2, JPH3, KCNA2, KCNA3, KCNC4, KCND1, KCND2, KCNF1, KCNG3, KCNIP1, KCNJ12, KCNJ4, KCNJ6, KCNJ9, KCNK1, KCNK10, KCNK12, KCNQ3, KCNQ5,…
GO:0015318	inorganic molecular entity transmembrane transporter activity	96	9.35672	8.10862e-11	[ADAMTS8, ANO9, ASIC2, ASPG, ATP2B3, ATP4A, ATP6V1C2, CABP1, CACNA1B, CACNA2D2, CACNA2D3, CACNA2D4, CACNG4, CACNG5, CACNG6, CAV1, CHRNA5, CHRNE, CLCNKA, CLIC6, CLU, CNGA1, CNGA4, CNR1, CRISP1, DAPK1, DPP10, DPP6, FXYD1, FXYD3, FXYD7, GAL, GLRB, GRIA3, GRIN1, GRIN2B, GRM2, HAP1, HPCAL4, JPH2, JPH3, KCNA2, KCNA3, KCNC4, KCND1, KCND2, KCNF1, KCNG3, KCNIP1, KCNJ12, KCNJ4, KCNJ6, KCNJ9, KCNK1, KCNK10,…
GO:0015075	ion transmembrane transporter activity	107	9.37774	4.51177e-12	[ADAMTS8, ANO9, ASIC2, ASPG, ATP2B3, ATP4A, ATP6V1C2, CABP1, CACNA1B, CACNA2D2, CACNA2D3, CACNA2D4, CACNG4, CACNG5, CACNG6, CAV1, CHRNA5, CHRNE, CLCNKA, CLIC6, CLU, CNGA1, CNGA4, CNR1, CRISP1, DAPK1, DPP10, DPP6, FXYD1, FXYD3, FXYD7, GAL, GLRB, GRIA3, GRIN1, GRIN2B, GRM2, HAP1, HPCAL4, JPH2, JPH3, KCNA2, KCNA3, KCNC4, KCND1, KCND2, KCNF1, KCNG3, KCNIP1, KCNJ12, KCNJ4, KCNJ6, KCNJ9, KCNK1, KCNK10,…
GO:0007267	cell-cell signaling	155	8.72257	1.1666e-14	[ABCA12, ADCY5, ADM, ADORA1, ADRA2B, AGT, AKAP12, ALPK2, APBA2, AREG, ASIC2, ATP6V1C2, BMP2, BMP6, CACNA1B, CACNG4, CACNG5, CADPS2, CALB2, CAMK2A, CASK, CAV1, CBLN1, CDH1, CELSR1, CHRNA5, CHRNE, CITED1, CLU, CNR1, CPLX2, CRB1, CRHR2, CTF1, CUX2, DBH, DCC, DRAXIN, ECE2, FABP5, FAM3B, FERMT1, FFAR4, FGF2, FGF9, FOLR2, FZD9, GAL, GDF15, GHRHR, GHSR, GJB2, GJD2, GLRB, GPR68, GRIA3, GRIN1, GRIN2B, GRM…
GO:0006811	ion transport	141	8.39286	4.66281e-12	[ADAMTS8, ADCYAP1R1, ADORA1, AGT, ANO9, ASIC2, ASPG, ATP2B3, ATP4A, ATP6V1C2, CABP1, CACNA1B, CACNA2D2, CACNA2D3, CACNA2D4, CACNG4, CACNG5, CACNG6, CAMK2A, CASK, CAV1, CHRNA5, CHRNE, CLCNKA, CLIC6, CLU, CNGA1, CNGA4, CNNM1, CNR1, CRISP1, CXCR4, DAPK1, DHRS7C, DPP10, DPP6, FGF2, FLVCR2, FOLR2, FXYD1, FXYD3, FXYD7, G6PD, GAL, GLRB, GRIA3, GRIN1, GRIN2B, GRM2, HAP1, HPCAL4, HRH3, JPH2, JPH3, KCNA2, …
