# Supplementary material for: The diverging role of O-GlcNAc Transferase in corticotroph and somatotroph adenomas
Source: Research Square preprint supplement (doi:10.21203/rs.3.rs-4350199/v1), 2024-05-10
Supplement: Supplementary file 8 [file 8def401d03b583419f0285aa.xlsx]

## Sheet: Sheet1
Lab ID	Type	OGT replicate 1	OGT replicate 2	OGT replicate 3	Average OGT	Sex	Age		Size (max, mm)	invasion ( Knosp grade)	Progression on Imaging		Pre-op ACTH (pg/mL)	Cortisol (ug/dL)	Pre-op GH (ng/mL)	Pre-op IGF1 (ng/mL)	post-op IGF1	Pre-op LH (mIU/mL)	Pre-op FSH (mIU/mL)	PRL (ng/mL)	TSH (uIU/mL)	T4 (ng/dL)	PA type (clinical diagnosis)		Immuno positivity*	PA type (IHC)		TPIT PCR		RNA sequencing	PIT1 TPM (RNA Seq)	GH1 TPM (RNA Seq)	PRL TPM (RNA Seq)	TPM (RNA Seq)	SF1 TPM(RNA Seq)	GATA3 TPM(RNA Seq)	Lhbeta TPM(RNA Seq)	FSHbeta TPM(RNA Seq)	TPIT TPM(RNA Seq)	POMC TPM(RNA Seq)
TB845	F somatotroph adenoma	1	1.70193	1.10599	1.26931	Male	76		16	0	N/A no f/u after 5 months		34.5		2.56	677	451			27.2	2.43	4.9	Acromegaly		GH, sparse PRL, TSH	Plurihormonal		Not measured		NO
TB636	F somatotroph adenoma	3.04507	3.29863	2.96676	3.10349	Female	52		26	4	No but had GKSRS to residual		30.9		4.2	513	436			Na			Acromegaly		GH	Somatotroph		Not measured		NO
TB786	F somatotroph adenoma	2.83889	1.71851	2.48644	2.34795	Male	19		39	4	No - persistent disease - 50 months		34.9		na	588	510						Acromegaly		GH, CK8	Somatotroph		Not measured		NO
TB837	F somatotroph adenoma	3.18562	4.19479	3.1941	3.52484	Female	29		9	1	Yes - 7 mos		37.5		12.9	623	494						Acromegaly		GH	Somatotroph		Not measured		NO
TB851	F somatotroph adenoma	2.1714	4.1507	2.68704	3.00305	Female	22		22	0	No - 23 months imaging and biochemical		24		na	706	766			6.5			Acromegaly		GH	Somatotroph		Not measured		NO
TB857	F somatotroph adenoma	1.88766	1.96191	1.60984	1.8198	Male	51		14	0	N/A no f/u after 3 months		39.1		3.04	762	579						Acromegaly		GH	Somatotroph		Not measured		NO
TB886	F mammosomatotroph adenoma	3.9199	4.00517	4.88912	4.2714	Female	51		12	0	N/A no f/u after 5 months		44.4		10.3	867	708			28.4			Acromegaly (Gigantism)		GH/PRL	Mammosomatotroph		Not measured		NO
TB512	F corticotroph adenoma	12.4714	6.46351	10.6843	9.87304	Female	38		8.5	0	no - 6mo f/u then LTF		49.2	10.4		213							Cushing		ACTH	Corticotroph		3188.29		YES	130.53	2.67	479.3	1.51	1.47	1.72	11.53	0.35	824.43	233096
TB594	F corticotroph adenoma	11.6647	9.7028	9.86497	10.4108	Female	47		17	1	no at 16 mos then LTF		86.4	24		157							Cushing		ACTH	Corticotroph		2028.06		YES	227.6	0.42	23.75	3.15	1.81	1.03	13.28	0.64	596.9	168903
TB621	F corticotroph adenoma	10.8992	6.96236	11.2643	9.70863	Female	26		3	0	none on imaging, but ? on hormone labs		45.8	15		181							Cushing		ACTH	Corticotroph		Not measured		NO
TB737	F corticotroph adenoma	11.923	10.2924	5.49346	9.23631	Male	61		23	2	N/A no f/u after 3 months		137.9	32.9		172							Cushing		ACTH, CK8	Corticotroph		Not measured		YES	121.39	4.44	6.33	2.51	16.45	1.53	0.43	0.17	725.88	131682
TB738	F corticotroph adenoma	15.1604	15.4667	11.8351	14.1541	Female	33		10	1	N/A no f/u after 4 months		103.8	14.6		na							Cushing		ACTH, CK8	Corticotroph		Not measured		YES	64.32	5.97	11.25	49.92	6.88	2.56	1.16	1.71	335.49	54769.9
TB784	F corticotroph adenoma	3.21276	5.20077	4.04294	4.15216	Female	50		12	0	No -14 months		49.3	35.6		161							Cushing		ACTH, CK8	Corticotroph		Not measured		YES	164.93	10.24	221.25	8.71	1.02	0.41	1.4	0.11	658.3	333003
TB788	F corticotroph adenoma	10.6412	5.80387	7.92568	8.12359	Male	44		22	1	No - 8 mos then LTF		101.6	7.7		197							Cushing		ACTH	Corticotroph		Not measured		YES	181.87	16.73	126.74	5.28	6.07	1.27	5.72	0.35	590.66	244513
TB841	F corticotroph adenoma	5.8939	6.82609	5.28541	6.0018	Female	32		8	0	N/A no f/u after 5 months		27.8	8.6		na							Cushing		ACTH (diffuse )	Corticotroph		Not measured		YES	277.68	9.8	272.09	3.72	0.87	1.27	1.46	0.39	737.9	115620
TB842	F corticotroph adenoma	19.219	13.7415	19.7462	17.5689	Female	30		8	1	N/A no f/u after 5 months		127	24.6		na							Cushing		ACTH	Corticotroph		Not measured		YES	232.27	6.55	301.65	3.74	10.8	0.83	1.31	0.35	634.28	158041
TB846	F corticotroph / NF somatotroph	8.58883	6.50233	6.77649	7.28922	Female	44		11	0	N/A no f/u after 4 months		90.1	20.1	na	na							Cushing		ACTH (diffuse)	Corticotroph		Not measured		YES	310.88	2840.4	70849.6	9.64	2.56	1.41	33.3	2.5	1010.11	84525.3
TB865	F corticotroph adenoma	3.59637	3.65746	2.36266	3.2055	Male	23		15	0	No- 23 mos (per labs)		41.5	14		477							Cushing		ACTH	Corticotroph		Not measured		NO
TB872	F corticotroph adenoma	4.19203	4.43443	5.9059	4.84412	Female	37		7	0	No -21 mos per labs		52.5	20.6		346							Cushing		ACTH	Corticotroph		Not measured		NO
TB858	F corticotroph adenoma	5.20222	3.89022	2.9055	3.99931	Female	40		4	0	N/A no f/u after 3 months		39.1	10.9		na							Cushing		ACTH	Corticotroph Crooke Cell adenoma		Not measured		NO
TB576	F corticotroph adenoma	11.4897	12.5741	13.4508	12.5048	Female	32		5.5	0	no - 61mos (persistent disease prior to index surgery)		129.2	17.1		na				Na			Cushing		sparse PRL, mild background ACTH	Plurihormonal		Not measured		NO
TB599	NF corticotroph/ NF somatotroph	28.9221		27.2175	28.0698	Male	22		43	3A	no - 32 mos		151.9	12	?	130							Cushing		ACTH	Corticotroph		Not measured		YES	1565.08	3.12	7.89	1.3	15.11	0.91	2.14	0.17	668.41	254933
TB566	F lactotroph adenoma	9.69271	13.0214	9.27823	10.6641	Male	32		74.9	1 - but 3rd ventricular extension	no at 58 months		8.7			96							Hyperprolactinemia		negative	Hormone Neg		Not measured		NO
TB754	F lactotroph adenoma	11.9256	14.5759	12.1338	12.8784	Female	28		10	3A	No -59 mos		22			269							Hyperprolactinemia		negative	Hormone Neg		42.0844		NO
TB539	F mammosomatotroph adenoma	23.8246	17.7299	16.3298	19.2948	Female	21		8	1	Yes - 59 mos		15.8		19.7	603	579			65.9			Hyperprolactinemia, Acromegaly		strongly positive for GH, focally positive for Prolactin	Mammosomatotroph		3.14978		NO
TB587	F mammosomatotroph adenoma	14.4214	10.0684	15.4209	13.3036	Female	45		22		Yes at 12 mos (per labs)		21		2.1	535	394			176.6			Hyperprolactinemia, Acromegaly		moderate density GH, prolactin strongly positive diffusely	Mammosomatotroph		25.0916		NO
TB600	F mammosomatotroph adenoma	6.60238	9.29706	6.29498	7.39814	Female	37		2	0	No, GK at 27 months for persistent dz - 58 mos		18.5		6.35	807	496			155.6			Hyperprolactinemia, Acromegaly		GH, CK WSS, diffuse PRL	Mammosomatotroph		Not measured		NO
TB830	F somatotroph adenoma	4.22453	5.59457	5.8645	5.22787	Female	59		17	2	No -17 mos		24.3		na	704	701	n/a		105.9			Hyperprolactinemia, Acromegaly		PRL/GH	Mammosomatotroph		32.8585		NO
TB570	F thyrotroph/ NF somatotroph/ NF gonadotroph adenomas	18.6543	13.2728	12.0858	14.671	Female	63		34	4	No - 56 mos		38.2		0.25	123	77			Na	1.95	0.99	Hyperthyrotropinemia		TSH, sparse GH, PRL	Plurihormonal		Not measured		NO
TB542	NF gonadotroph/ NF lactotroph adenoma	5.53655	4.65942	6.50751	5.56783	Male	44		14	0	no -37 mos		n/a	n/a		n/a		Na	Na	Na			NFPA		LH, FSH, scattered PRL	Plurihormonal		Not measured		NO
TB644	NF corticotroph adenoma	4.00023	7.69611	4.80901	5.50178	Female	65		19	0	no at 43 mos		33.8	8.8	na	48	na						NFPA		CK18	Hormone Neg		215.349		YES	502.42	21.92	55.12	6.73	3.48	2.97	1.39	1.65	185.87	3672.83
TB779	NF corticotroph adenoma	5.10811	3.99962	4.36154	4.48976	Female	73		5	4	No - 40 mos		10.7	6.1		120							NFPA		negative	Hormone Neg		613.416		YES	485.49	59.14	64	9.03	2.33	2.86	10.59	2.11	146.64	3581.58
TB596	NF corticotroph/ NF somatotroph	3.66018	4.80699	6.59319	5.02012	Female	58		4	1	Yes at 50 mos		n/a	n/a	na	n/a							NFPA		negative	Hormone Neg		412.916		YES	1072	29.07	34.75	6.59	4.46	3.61	2.68	1.48	348.18	4682.32
TB521	NF gonadotroph adenoma	9.63788	9.52656	10.3884	9.85093	Female	48		26	1	yes at 47 mos		14.3			77		5.9	2.4		1.16	0.86	NFPA		LH, FSH, few TSH	Gonadotroph		Not measured		NO
TB559	NF gonadotroph adenoma	11.1719	9.35574	7.35379	9.2938	Male	87		32	0	no - 45 mos then LTF (deceased		18.1			56		5.7	9.8				NFPA		LH	Gonadotroph		Not measured		NO
TB560	NF gonadotroph adenoma	8.82035	4.14087	7.39049	6.7839	Male	62		29	2	yes at 4 years then at 33 mos		16.8			45		3.5	4.2				NFPA		Rare LH	Gonadotroph		Not measured		NO
TB625	NF gonadotroph adenoma	6.38764	6.18557	6.15372	6.24231	Male	42		18	1	no - 41 mos		33.4			183		18.8	3.9				NFPA		FSH	Gonadotroph		Not measured		NO
TB696	NF gonadotroph adenoma	8.107	6.53547	6.64908	7.09719	Female	63		29	0	N/A no f/u after 4 months		8			145		7.9	13.1				NFPA		sparse FSH, moderate LH, occasional CK18	Gonadotroph		Not measured		NO
TB703	NF gonadotroph adenoma	5.24315	3.53532	3.66556	4.14801	Male	73		10	1	no -38 mos		19.7			59		3.7	3.5				NFPA		mod FSH, sparse LH	Gonadotroph		Not measured		NO
TB729	NF gonadotroph adenoma	2.93916	2.37905	3.89244	3.07021	Male	75		22	3A	no -41 mos		n/a			n/a		Na	Na				NFPA		multifocal CK8, scattered FSH, rare LH	Gonadotroph		Not measured		NO
TB753	NF gonadotroph adenoma	2.95313	2.15456	2.63415	2.58062	Male	65		27	3A	N/A no f/u after 3 months		37.9			n/a		Na	Na				NFPA		LH	Gonadotroph		Not measured		NO
TB793	NF gonadotroph adenoma	2.43762	3.20346	1.97125	2.53744	Male	76		4	2	Yes - 43 months		9			87		1.2	2				NFPA		CK8, scant LH	Gonadotroph		Not measured		NO
TB840	NF gonadotroph adenoma	6.79798	7.63801	6.49586	6.97728	Male	54		23	1	No - 23 months		58.9			na		0.2	1.1				NFPA		FSH	Gonadotroph		Not measured		NO
TB843	NF gonadotroph adenoma	4.7689	3.72816	4.71355	4.40353	Male	55		21	1	No - 14 mos		12.3			91		4.7	4.2				NFPA		FSH (diffuse)	Gonadotroph		Not measured		NO
TB884	NF gonadotroph adenoma	7.50232	7.73604	6.47993	7.23943	Female	70		30	4	No - 6 months, needs more FU time		18.1			308		12.8	31.9				NFPA		FSH	Gonadotroph		Not measured		NO
TB055	NF gonadotroph adenoma	13.4638	13.304	14.3304	13.6994	Male	46		40	2	no - 150 (but got radiated 6 mos after surgery even though residual was stable)		n/a			156							NFPA		negative	Hormone Neg		2.79714		YES	449.65	37.51	54.45	87.18	275.08	147.14	64.29	30.43	15.41	3491.96
TB101	NF gonadotroph adenoma	8.31826	7.15909	9.55907	8.34547	Male	76		25	3A	no - stable residual 25 mos		n/a			127							NFPA		negative	Hormone Neg		2.55388		YES	562.68	5.31	57.09	80.6	291.57	108.5	50.77	92.54	7.38	1147.51
TB528	NF gonadotroph adenoma	9.78111	8.22583	10.1773	9.39476	Male	79		24	0	no at 15 mos then LTF (deceased)		n/a			n/a							NFPA		CK8	Hormone Neg		12.5486		NO
TB586	NF gonadotroph adenoma	4.99188	5.35715	4.90541	5.08482	Male	44		35	3A	yes at 44 months		27.3			113							NFPA		negative	Hormone Neg		2.12318		YES	785.2	158.52	172.59	201.71	210.47	149.83	39.24	31.43	13.59	2269.42
TB675	NF gonadotroph adenoma	7.35604	9.1669	12.156	9.55964	Female	55		20	4	Yes - 19 mos		22.2			124							NFPA		negative	Hormone Neg		8.9051		YES	644.6	285.9	341.34	181.87	127.98	202.4	38.3	21.14	9.79	2360.07
TB836	NF gonadotroph adenoma	4.89461	3.51865	4.76418	4.39248	Male	68		23	1	ftb539		4.3			85							NFPA		negative	Hormone Neg		3.90151		YES	574.48	7.27	66.86	79.51	64.3	108.07	50.35	94.61	9.12	1670.12
TB862	NF gonadotroph adenoma	7.60303	8.25511	6.4176	7.42525	Female	76		26	2	No 17 mos		16.6			69							NFPA		SF-1	Hormone Neg		Not measured		NO
TB877	NF gonadotroph adenoma	3.60153	3.54383	3.41464	3.52	Female	74		20	1	No -14 mos		19.1			121							NFPA		SF-1	Hormone Neg		Not measured		NO
TB568	NF gonadotroph/ NF lactotroph adenoma	6.65822	5.46377	6.98318	6.36839	Female	71		21	3A	no at 39 months		25.7			216		18.8	42.3	Na			NFPA		sparse PRL, FSH	Plurihormonal		Not measured		NO
TB660	NF gonadotroph/ NF somatotroph adenomas	29.8906	36.5754	29.6336	32.0332	Female	38		26	2	No - 41 mos		21.5		na	165				92.7			NFPA		scattered CK18 no hormone stainign but Hyperprolactinemia	Hormone Neg		2.8061		YES	1029.67	20.4	33.98	127.15	271.18	250.11	249.28	19.09	7.25	1416.11
TB637	NF lactotroph / NF thyrotroph adenoma	10.3563	6.819	11.1351	9.43682	Male	53		27	0	no - 41 mos		26.5			111				Na	2.85	0.84	NFPA		rare PRL, TSH (may be normal tissue interposed); strong multifocal CK18	Plurihormonal		Not measured		NO
TB520	NF lactotroph adenoma	19.6936	17.6684	17.2008	18.1876	Female	60		15	0	no - 47mos		na			na				11			NFPA		PRL	Lactotroph		Not measured		NO
TB835	NF thyrotroph adenoma	6.08665	5.62322	5.66293	5.79093	Female	75		25	3A	N/A no f/u after 6 months		18	7.7		87			24.2	17.3	2.21	1.1	NFPA		negative	Hormone Neg		2.53151		YES	1257.33	811.51	900.79	158.44	2.29	31.52	0.57	1.42	10.91	2041.45
TB755	NF thyrotroph adenoma	3.30294	2.96669	3.13185	3.13383	Male	67		15	2	No - 39 months		na			na					Na	Na	NFPA		TSH	Thyrotroph		Not measured		NO
TB504	NF Thyrotroph/NF Somatotroph/ NF Gonadotroph	11.2073	13.7048	14.6751	13.1957	Male	72		25	1	No - 55 mos		34.6		na	85	154	1.8	13.5		3.71	1.1	NFPA		TSH, GH, FSH	Plurihormonal		Not measured		NO
BB139	Normal	13.9951	12.0113	14.2239	13.4101																		Normal		N/A	Normal		N/A		NO
BB143	Normal	14.1759	14.8503	9.40486	12.8103																		Normal		N/A	Normal		N/A		NO
BB198	Normal	13.6471	17.5691	11.4006	14.2056																		Normal		N/A	Normal		N/A		NO
