# Supplementary material for: The diverging role of O-GlcNAc Transferase in corticotroph and somatotroph adenomas
Source: Research Square preprint supplement (doi:10.21203/rs.3.rs-4350199/v1), 2024-05-10
Supplement: Supplementary file 9 [file a56ae4f05aafc1f599e00ccb.xlsx]

## Sheet: F corticotroph
	R	pvalue	T847	T738	T841	T737	T842	T594	T512	T788	T599	T614	T763	T784
ENSG00000134909	0.797203	0.00190037	7.7819	6.7729	6.8394	8.9844	12.1748	2.0976	5.583	3.7035	18.5587	8.8543	3.1067	5.3483
ENSG00000176087	0.867133	0.000259812	29.7143	41.6991	23.3502	65.273	30.0919	26.8737	14.0523	17.3539	33.4251	28.5972	10.7589	16.1241
ENSG00000198373	0.769231	0.00344645	17.4599	26.4214	17.8374	12.7483	17.0188	11.2766	8.7995	9.0604	17.6802	14.4718	7.9058	11.8783
ENSG00000066629	0.811189	0.00136332	12.9866	11.8454	10.6121	19.7881	16.0325	6.2628	7.5438	7.2612	11.0523	9.7772	4.1285	8.0876
ENSG00000100029	0.825175	0.000951363	32.2796	36.4994	33.6996	30.2927	33.5941	25.6585	31.5643	29.1989	38.5895	35.9873	19.8613	18.8892
ENSG00000100441	0.825175	0.000951363	20.3043	19.7426	13.4635	19.6521	12.3795	10.5154	7.4373	17.8002	30.1852	12.731	8.2725	8.0419
ENSG00000166398	0.79021	0.00222314	15.5271	21.4854	10.6705	20.0641	13.3624	15.9754	7.8083	8.1241	26.166	9.9467	7.1557	9.6076
ENSG00000184990	0.804196	0.00161477	37.6351	38.6122	39.9905	45.7873	34.5861	33.2144	31.7875	38.3717	74.9962	37.8677	19.3632	29.0826
ENSG00000185338	0.811189	0.00136332	5.5733	28.0685	2.6478	32.4161	7.8621	5.4716	5.4895	0.8004	63.5326	12.4277	2.2526	3.278
ENSG00000074755	0.811189	0.00136332	18.4035	15.5632	14.2445	20.5717	13.9439	9.2011	7.8602	11.6161	12.9211	10.0917	8.6993	7.0943
ENSG00000175467	0.86014	0.000331668	69.231	75.2162	60.1392	75.3534	69.4262	47.4047	48.8019	51.5107	63.5568	58.9757	34.7602	49.6362
ENSG00000242802	0.783217	0.00258621	16.0562	22.1229	18.1509	32.1552	15.7726	12.1362	8.0263	16.4494	22.7271	11.8462	10.9088	11.5953
ENSG00000131791	0.776224	0.00299286	16.301	15.5365	9.0936	29.4358	19.8134	5.4333	7.4314	6.3753	34.3988	16.4825	3.9275	11.9182
ENSG00000105127	0.811189	0.00136332	32.8537	26.4759	27.1514	22.5035	23.3049	17.2781	13.9287	18.602	29.2568	18.7056	14.3695	16.7293
ENSG00000173465	0.93007	1.17022e-05	21.3277	23.4633	19.073	32.0599	22.5873	16.752	20.8882	15.6262	23.78	19.8658	12.5248	14.6652
ENSG00000068366	0.818182	0.00114311	12.5391	18.1013	9.6456	20.1912	10.9632	4.3149	6.8937	5.3039	15.3491	5.4823	4.2277	10.6736
ENSG00000198408	0.916084	2.8428e-05	60.7392	54.423	44.4643	66.3642	61.9978	39.4625	28.6868	37.046	102.303	44.2347	25.5981	28.5719
ENSG00000141867	0.867133	0.000259812	21.4844	22.8545	18.8783	24.2939	18.4286	18.0958	14.637	20.6925	39.7945	12.9715	10.1834	11.3411
ENSG00000103549	0.783217	0.00258621	35.6244	30.5145	43.509	37.5433	35.5211	30.0085	31.4165	22.518	48.1624	27.7554	16.6067	24.6874
ENSG00000127511	0.776224	0.00299286	32.1047	30.852	34.6808	30.1074	28.8871	22.2031	22.0889	19.9974	34.8435	15.973	18.1088	18.4883
ENSG00000046651	0.93007	1.17022e-05	19.5609	23.8779	20.1889	25.5571	21.0682	15.5516	11.3271	17.2713	34.1495	18.1641	13.7954	9.2174
ENSG00000071655	0.811189	0.00136332	28.7667	37.232	34.4438	34.2623	38.1575	28.6382	29.2751	32.4097	50.6386	30.8897	22.1695	24.504
ENSG00000130204	0.783217	0.00258621	28.4372	44.5252	38.082	66.2753	41.9725	41.7418	38.6131	27.868	94.6278	32.9631	20.0484	27.8659
ENSG00000125148	0.811189	0.00136332	42.9068	224.487	42.2561	68.6323	52.1579	27.9974	26.9367	15.0214	132.164	126.988	16.2049	41.2966
ENSG00000198763	0.762238	0.00395045	11842.5	18978.3	7742.13	18259.2	8006.65	5626.97	6091.84	7931.37	19973	8391.19	11009.7	6691.58
ENSG00000102393	0.769231	0.00344645	14.8479	15.5561	17.2175	12.4807	10.8464	11.601	14.185	7.8823	18.4989	9.0988	7.1013	8.0277
ENSG00000141905	0.811189	0.00136332	51.7278	46.9308	45.3654	44.5194	40.7961	39.6399	28.5216	34.9751	59.4126	35.9458	22.2171	36.429
ENSG00000078061	0.839161	0.000642826	61.1361	49.4413	49.3712	49.0949	53.6341	35.991	25.9228	29.2637	100.548	45.8464	25.7595	34.7486
ENSG00000115758	0.783217	0.00258621	41.7821	64.8592	54.978	73.1948	56.2962	56.7931	44.4309	38.0918	100.598	38.2753	23.7475	26.9899
ENSG00000105048	0.769231	0.00344645	55.577	2.8497	53.6701	3.4136	14.134	0.8576	0.6825	1.8518	45.6577	1.6865	0.7989	0.0474
ENSG00000104824	0.839161	0.000642826	80.6567	78.8751	68.9141	104.207	76.3283	66.2389	61.4916	71.7473	92.6316	53.6931	44.3957	60.0033
ENSG00000188486	0.867133	0.000259812	60.3747	58.5294	43.207	60.5831	35.5949	41.452	49.5029	33.596	78.7574	51.6991	22.3721	22.647
ENSG00000187837	0.888112	0.000114134	29.0031	28.7246	6.4125	39.1105	21.4558	8.8937	6.0361	5.1929	430.875	2.7015	2.5789	0.8019
ENSG00000108654	0.832168	0.000785442	314.056	372.873	225.435	495.843	235.53	159.214	172.374	236.836	270.1	220.578	125.59	182.786
ENSG00000035403	0.832168	0.000785442	17.7156	46.6757	8.4275	8.9778	6.1195	1.1304	3.9924	1.6977	15.1824	6.8562	5.3733	5.4924
ENSG00000126767	0.755245	0.00450844	23.38	26.7852	20.7797	29.8503	21.6858	26.8487	20.4272	15.8422	89.6449	17.2972	8.7007	17.1506
ENSG00000068323	0.811189	0.00136332	71.7904	44.9179	41.5935	49.4565	47.3788	26.2277	31.774	39.4689	41.8272	38.2671	20.3956	33.1514
ENSG00000147133	0.825175	0.000951363	16.4825	15.9291	13.9455	20.1159	13.0241	9.9552	7.504	8.2073	19.7304	10.2742	6.3159	11.5289
ENSG00000011304	0.881119	0.000152674	105.558	90.5755	84.098	104.248	88.1038	68.2391	62.5274	73.7935	96.7251	64.0585	40.1815	39.8064
ENSG00000105397	0.762238	0.00395045	38.928	45.4436	49.4917	51.1007	37.054	36.2314	30.644	28.2885	60.1445	28.8222	29.4382	31.2252
ENSG00000088256	0.846154	0.000521134	48.1459	54.0364	54.981	45.8078	54.0746	40.1687	31.1327	32.7214	57.2418	41.9406	25.0589	29.3948
ENSG00000169045	0.804196	0.00161477	83.2532	91.1141	65.0734	103.133	74.5291	63.2017	47.0695	95.6131	121.257	52.3746	42.5966	38.6115
ENSG00000106799	0.797203	0.00190037	20.0057	21.5734	12.5225	18.8771	13.5322	13.8562	10.7582	10.4874	27.7795	6.5465	8.4092	8.7559
ENSG00000171189	0.804196	0.00161477	9.8909	23.279	4.7054	10.5345	18.9288	0.4097	0.3762	4.9466	15.8368	1.2266	0.2416	1.2864
ENSG00000134352	0.839161	0.000642826	57.5246	75.9537	46.6408	46.4138	64.5634	39.8211	25.3295	28.1647	66.9587	34.7691	18.1996	31.2039
ENSG00000173812	0.79021	0.00222314	461.277	520.431	382.346	656.681	403.722	354.663	317.549	338.467	408.209	434.403	211.276	357.433
ENSG00000079215	0.832168	0.000785442	0.4359	4.6717	0.4182	1.7302	0.7508	0.1189	1.0916	0.5478	12.1247	0.3999	0.3272	0.2137
ENSG00000120457	0.846154	0.000521134	1.7678	0.9932	0.5922	0.5613	1.4115	0.508	0.5224	0.4013	21.5085	0.4889	0.413	0.4551
ENSG00000105723	0.811189	0.00136332	48.6485	49.6548	55.1797	89.9695	45.0289	47.4119	46.7122	32.962	55.8697	47.7799	22.4901	36.6838
ENSG00000102119	0.818182	0.00114311	102.256	85.1676	64.2284	108.477	70.1869	68.146	70.643	60.6771	201.065	73.8871	54.212	64.3271
ENSG00000155850	0.804196	0.00161477	13.5586	8.2257	6.8276	12.7115	15.147	6.5769	4.6883	4.4549	13.9669	6.2362	3.2155	6.0539
ENSG00000119950	0.79021	0.00222314	23.7112	33.2367	19.2259	27.1068	22.1935	14.9263	16.4025	16.6864	24.232	32.1249	11.6026	17.0303
ENSG00000079805	0.769231	0.00344645	34.5538	29.0823	32.443	32.1724	32.2145	30.0456	28.8693	22.2323	49.5899	26.8856	18.2569	20.5729
ENSG00000067829	0.839161	0.000642826	80.1362	58.4587	69.1482	58.339	65.1653	45.4562	54.1987	54.3502	84.4794	53.585	41.8137	52.3726
ENSG00000099783	0.895105	8.36659e-05	149.451	164.857	145.551	173.661	159.685	121.782	112.779	129.248	201.044	134.868	83.3475	132.162
ENSG00000116489	0.895105	8.36659e-05	25.007	32.5526	18.3955	33.0497	19.7132	17.4617	18.9593	12.607	24.2931	20.7172	12.8663	12.4903
ENSG00000213463	0.846154	0.000521134	9.5867	18.4276	12.1895	34.2802	10.4009	7.0439	5.4954	6.8056	11.1316	9.5107	3.9807	6.5167
ENSG00000158373	0.783217	0.00258621	20.5226	26.2265	9.453	68.9579	12.8575	15.391	1.1777	10.9199	22.055	15.8193	1.4483	3.1918
ENSG00000070831	0.769231	0.00344645	118.13	120.298	89.8363	113.133	99.3206	87.6604	68.1389	69.0303	80.6958	76.5635	44.1747	67.5362
ENSG00000213246	0.776224	0.00299286	88.9653	136.945	91.0283	237.185	75.4132	86.7503	75.6007	71.7366	87.0668	80.0399	34.3193	44.8208
ENSG00000133275	0.951049	2.03842e-06	62.2625	63.4911	57.2269	70.5138	58.5261	42.5498	38.7712	43.3304	64.408	45.3906	31.855	38.2191
ENSG00000102317	0.846154	0.000521134	97.4502	135.621	55.3039	137.531	123.635	73.324	51.0161	62.6537	199.947	78.7152	57.0958	46.9424
ENSG00000130382	0.818182	0.00114311	45.3061	56.802	46.6107	48.3986	69.603	30.1148	29.5281	41.3937	50.3926	30.0242	24.9659	29.7379
ENSG00000173039	0.881119	0.000152674	22.3776	36.6028	18.6305	31.7423	18.0977	12.3807	14.0176	13.4053	17.217	13.596	11.1247	9.7047
ENSG00000092010	0.811189	0.00136332	180.311	150.774	96.8732	167.564	111.234	95.5506	95.2899	113.029	148.046	85.0467	42.1865	79.1453
ENSG00000185800	0.818182	0.00114311	44.932	33.0557	32.632	30.2629	38.3192	28.1684	26.792	25.2674	48.6964	18.9029	13.0981	24.5673
ENSG00000010295	0.832168	0.000785442	25.2418	20.5572	20.0686	16.4122	16.7456	15.1011	12.0483	17.8657	25.5913	15.3707	11.8494	11.181
ENSG00000145907	0.755245	0.00450844	13.2278	16.0731	13.5953	19.8649	16.6277	15.0679	10.4734	12.0295	15.3782	13.25	6.9587	10.2914
ENSG00000070814	0.916084	2.8428e-05	11.579	12.079	11.0947	16.8301	14.865	9.5422	9.5705	11.5373	17.6268	10.3291	7.2492	9.1205
ENSG00000106244	0.769231	0.00344645	161.843	147.781	139.089	191.575	144.165	153.569	115.574	102.177	183.81	113.471	64.8617	106.175
ENSG00000099331	0.797203	0.00190037	10.3569	22.4006	14.133	15.7668	13.5877	9.3081	6.4848	6.3181	18.2841	8.7947	8.4245	8.9737
ENSG00000065883	0.769231	0.00344645	15.3062	14.2968	13.5086	17.3835	16.2441	14.2338	10.221	14.036	14.6057	12.3453	7.1496	10.1568
ENSG00000081791	0.776224	0.00299286	26.3991	25.3809	25.7053	33.0903	30.4464	18.9051	18.3396	25.831	28.9176	21.9891	14.4589	12.498
ENSG00000113657	0.832168	0.000785442	24.9688	95.5258	16.2992	29.5367	30.764	3.1187	17.8824	6.2824	21.5588	7.7201	7.6044	7.2006
ENSG00000126456	0.839161	0.000642826	35.7612	47.0696	29.067	34.2565	33.266	19.6951	26.3763	22.3814	49.1566	33.2946	25.1231	31.4266
ENSG00000108883	0.839161	0.000642826	8.9137	17.4765	10.5332	39.6711	12.1865	6.0418	6.3168	6.9276	8.0093	7.2532	5.3117	6.2225
ENSG00000155463	0.881119	0.000152674	45.3803	43.7063	29.9881	57.1631	37.1054	36.7656	28.057	25.2276	55.8495	26.59	17.0582	24.2471
ENSG00000009335	0.888112	0.000114134	15.4696	19.4206	12.8946	26.2374	16.859	13.0991	9.2961	10.8795	19.9183	11.924	6.55	8.8893
ENSG00000143368	0.79021	0.00222314	55.5144	52.8367	56.8466	77.1575	57.1167	45.1163	46.3522	39.9642	49.9224	46.782	26.1979	38.5714
ENSG00000104825	0.888112	0.000114134	24.5703	34.0954	23.1896	45.2634	23.3229	15.9162	19.4702	16.4549	34.5277	22.6373	16.962	21.4878
ENSG00000185236	0.839161	0.000642826	240.779	183.28	222.684	177.517	204.617	172.067	159.89	149.423	255.894	173.905	125.952	152.404
ENSG00000213088	0.776224	0.00299286	7.4268	32.4838	5.5682	33.8769	2.1802	1.6503	2.8684	3.3057	5.7335	2.3334	2.6205	0.88
ENSG00000184678	0.762238	0.00395045	249.342	76.8948	114.232	206.452	64.8758	82.6558	30.6501	29.4967	168.058	55.1597	14.0862	24.4035
ENSG00000105197	0.818182	0.00114311	22.2905	22.5693	19.1523	32.8907	18.6837	21.7143	19.6915	16.9264	41.8529	14.8902	12.2178	13.6173
ENSG00000171161	0.797203	0.00190037	32.651	26.1104	31.6464	34.9488	30.0552	18.5143	26.3234	21.7811	31.8367	25.3183	18.398	22.7892
ENSG00000151233	0.79021	0.00222314	15.349	9.506	8.5364	15.964	12.3536	8.6591	5.1234	7.0104	17.6728	12.5953	4.1539	7.8009
ENSG00000160741	0.762238	0.00395045	34.6762	34.9153	28.9083	31.6953	29.8574	19.3817	20.7632	26.9024	25.4065	23.9817	18.7713	23.5175
ENSG00000167487	0.79021	0.00222314	14.2066	15.8733	20.2068	28.1084	16.9489	10.3244	10.6445	11.3446	18.215	11.3688	11.2252	10.9682
ENSG00000067334	0.797203	0.00190037	15.7994	15.5701	15.4799	16.8588	14.9537	15.4517	12.8696	11.189	17.4313	11.4692	6.6163	13.3104
ENSG00000158615	0.839161	0.000642826	27.7857	30.091	17.5659	21.204	24.9387	10.5199	12.5381	10.9178	19.2156	15.042	10.0001	13.2177
ENSG00000154511	0.783217	0.00258621	12.57	12.2401	12.6325	10.5566	11.4489	4.9393	8.9234	5.9955	12.9622	7.3255	4.8207	9.6269
ENSG00000132004	0.811189	0.00136332	11.098	13.2257	9.5599	17.1621	9.1117	9.512	7.1707	6.6792	13.7603	10.9845	8.0928	7.4033
ENSG00000132017	0.853147	0.000418118	49.9301	39.9799	37.3706	34.3305	35.8923	28.296	25.9055	30.8634	40.7423	23.5597	23.2445	19.2992
ENSG00000169718	0.846154	0.000521134	36.6048	59.1803	32.9191	91.8787	39.0905	29.1122	25.649	34.0795	51.4361	38.7246	29.0572	26.0028
ENSG00000164329	0.762238	0.00395045	9.736	13.8459	11.5284	14.0173	12.4635	10.5917	5.3802	12.1945	18.6738	9.5164	6.3982	8.5803
ENSG00000105732	0.783217	0.00258621	14.9513	12.6982	16.2022	18.0403	15.3366	14.2321	12.3357	10.7595	25.2195	10.387	7.84	7.7896
ENSG00000168591	0.783217	0.00258621	27.7541	55.7771	34.9986	81.9431	26.1232	21.9544	19.6075	24.1016	31.6087	23.9032	24.7903	20.499
ENSG00000146834	0.867133	0.000259812	62.5023	67.315	43.1888	59.5429	53.3092	45.6215	33.3598	31.9393	105.534	53.5017	24.8275	43.1426
ENSG00000184867	0.811189	0.00136332	81.1415	59.9021	54.7113	128.611	67.5863	49.4564	43.1898	38.5769	119.864	57.5062	44.6589	51.1521
ENSG00000215251	0.839161	0.000642826	15.2035	16.1449	15.5831	31.9828	15.5085	13.0863	10.6283	10.44	20.3576	15.4555	5.7607	13.3273
ENSG00000085872	0.797203	0.00190037	27.7589	24.27	31.2644	38.7767	26.3621	23.9803	19.9688	20.724	41.7498	17.8269	12.6649	18.6289
ENSG00000078804	0.804196	0.00161477	64.8265	33.0081	25.0801	47.2744	28.5799	16.2643	29.0603	10.5754	53.691	13.1723	11.0204	15.9755
ENSG00000160087	0.811189	0.00136332	43.7839	41.0051	44.1078	52.9116	39.0011	31.163	38.7985	35.0431	38.8577	37.8504	23.7757	27.6858
ENSG00000105229	0.755245	0.00450844	32.6506	27.4433	42.7357	45.2339	31.6062	27.3715	21.5074	22.5906	38.0253	26.9029	20.4127	25.9528
ENSG00000197114	0.79021	0.00222314	13.623	12.3435	12.6061	17.2469	11.7193	10.7563	9.706	11.937	12.4747	9.7943	9.5269	9.3239
ENSG00000185163	0.811189	0.00136332	18.9174	19.8137	22.5003	29.1258	16.5916	15.3865	15.6147	17.4849	25.5585	10.6421	10.4541	11.4369
ENSG00000152409	0.79021	0.00222314	10.1179	11.4739	12.362	15.0712	11.5556	9.376	6.5673	10.1503	16.292	8.8767	6.1296	8.5063
ENSG00000129347	0.972028	1.28681e-07	27.5206	30.6152	22.4535	36.8621	25.7729	19.7809	22.3306	20.2221	34.1377	20.3005	16.8137	15.0091
ENSG00000160688	0.811189	0.00136332	16.7097	16.9627	13.9061	28.2104	17.4712	12.4774	11.1736	7.9048	13.7384	12.9942	7.5328	8.5312
ENSG00000125676	0.902098	5.99786e-05	18.0336	14.9226	11.1192	15.2297	12.8912	9.0826	7.1755	8.9496	14.9216	10.632	6.9887	6.7828
ENSG00000182446	0.762238	0.00395045	40.3492	54.6536	35.8852	132.772	41.057	26.3316	27.0953	30.213	30.7963	35.0533	19.2117	30.6075
ENSG00000160410	0.846154	0.000521134	22.9912	29.6229	11.6321	38.5007	27.8549	9.0508	10.1641	9.5663	38.9608	19.8779	9.5945	11.7457
ENSG00000140153	0.818182	0.00114311	11.7053	10.6344	11.372	17.1775	9.5209	9.2654	7.3568	10.3032	11.5643	7.3896	4.7984	5.7468
ENSG00000137965	0.79021	0.00222314	261.606	35.9028	5.0194	5.1561	29.1236	2.9844	1.5659	17.898	38.9422	3.2622	4.5648	1.4651
ENSG00000102181	0.762238	0.00395045	38.2396	50.4644	48.7358	49.3742	52.6514	34.0149	46.9793	37.2681	50.6941	41.3542	21.8649	41.3322
ENSG00000119638	0.853147	0.000418118	38.7464	42.8938	35.9902	78.3421	32.0902	30.6084	22.453	35.242	52.5499	28.4765	17.3729	26.7266
ENSG00000123064	0.755245	0.00450844	22.699	40.2223	26.187	51.418	26.3828	17.3295	19.0411	27.5342	27.7028	28.9404	14.6657	18.1366
ENSG00000144136	0.86014	0.000331668	17.4949	22.8906	16.8885	19.4568	17.7913	15.5574	9.3805	8.2986	18.6396	11.5583	8.7223	10.2281
ENSG00000105298	0.762238	0.00395045	14.4947	20.8287	16.8305	31.2397	14.9017	10.6357	11.3747	10.8729	18.2029	11.17	11.5239	12.4207
ENSG00000126870	0.811189	0.00136332	17.1109	15.4006	15.3811	15.6121	20.5601	13.349	12.3772	10.2805	30.2129	17.0682	9.5785	11.5829
ENSG00000105618	0.874126	0.000200713	75.2788	75.7116	69.493	107.219	61.2523	51.359	48.4817	49.1188	97.3275	56.3416	38.7561	56.0467
ENSG00000154265	0.776224	0.00299286	26.9814	10.7962	12.1073	16.6364	9.2856	6.094	7.1983	10.3435	19.5048	8.6556	6.2374	8.7408
ENSG00000140948	0.755245	0.00450844	29.6308	21.0582	25.4398	15.2223	23.4434	14.6296	15.1146	15.1792	19.8003	18.3581	9.2068	14.0862
ENSG00000163930	0.839161	0.000642826	43.9562	51.6855	47.0378	66.7393	51.486	22.0503	30.1908	29.0186	42.4316	31.8892	23.5349	28.7607
ENSG00000168490	-0.755245	0.00450844	34.8883	7.4181	48.2851	7.3741	17.9934	206.25	54.2277	154.394	3.817	15.1809	78.7072	34.3214
ENSG00000130202	0.811189	0.00136332	59.2011	55.6298	40.5517	46.4352	70.5944	14.6751	44.5625	37.0811	66.1788	32.4265	31.5821	33.6344
ENSG00000005007	0.776224	0.00299286	44.4282	52.8057	54.1653	71.2934	41.2014	36.1262	27.3544	32.0956	38.675	37.4099	25.0086	28.0398
ENSG00000108604	0.762238	0.00395045	77.492	83.0661	31.9396	138.221	49.906	30.6158	19.047	41.8844	43.5966	51.8669	26.0335	29.1465
ENSG00000133193	0.846154	0.000521134	18.6082	22.4255	18.7403	49.639	21.746	15.1133	11.787	12.0009	38.7426	18.9234	7.3304	14.3603
ENSG00000169895	0.888112	0.000114134	18.8579	18.649	16.0944	17.5277	17.2921	13.9249	11.5433	7.9446	19.3783	15.7637	6.1052	15.2409
ENSG00000172081	0.86014	0.000331668	11.07	16.6319	11.6062	18.6086	11.4715	8.7058	9.6423	7.1372	11.5618	9.0803	8.6839	7.3705
ENSG00000138785	0.867133	0.000259812	12.391	11.4182	9.3796	11.8929	10.8626	8.2495	9.6516	7.4981	10.1123	9.0988	4.0259	7.1602
ENSG00000161914	0.846154	0.000521134	11.8455	9.8035	10.544	10.9573	10.5509	8.7237	8.7701	9.3569	23.4106	8.5816	8.622	8.0475
ENSG00000181222	0.755245	0.00450844	62.9507	60.4632	52.0208	71.8217	66.59	30.1288	32.7674	35.5248	58.0845	35.3586	23.5717	45.351
ENSG00000007080	0.783217	0.00258621	101.625	125.211	117.462	120.274	104.635	106.404	118.989	76.494	121.343	80.0433	51.6257	74.3699
ENSG00000198841	0.811189	0.00136332	13.4707	15.5487	16.3036	22.2644	17.0531	13.7595	13.898	11.842	23.504	12.3675	6.3016	9.9119
ENSG00000071626	0.818182	0.00114311	22.9217	31.2535	24.2968	29.1768	26.4483	17.7804	17.7264	23.8821	30.1956	20.0645	16.2203	20.5011
ENSG00000184863	0.797203	0.00190037	12.7707	13.3272	11.1243	16.2818	10.4638	7.0607	6.414	8.318	10.4655	7.873	7.1803	7.7309
ENSG00000119650	0.762238	0.00395045	24.309	19.6201	19.4961	33.4594	21.3133	17.8512	16.6649	20.5885	25.7851	20.5549	12.888	17.8435
ENSG00000166166	0.797203	0.00190037	13.8011	29.4399	13.329	46.0398	12.3468	17.7212	11.3306	10.9928	22.6748	9.3996	8.9607	7.4297
ENSG00000068308	0.776224	0.00299286	111.692	93.405	96.5156	135.032	95.6206	80.1354	79.4219	73.1038	139.077	79.6153	50.2624	80.4622
ENSG00000179562	0.818182	0.00114311	18.4694	15.865	15.2593	21.6699	16.1909	15.7801	8.662	7.5698	19.7882	10.7618	5.0273	9.1877
ENSG00000139410	0.755245	0.00450844	27.0001	28.2406	19.422	67.1859	27.8455	11.3707	16.7673	37.0358	38.6872	28.0017	9.4992	16.4947
ENSG00000165915	0.853147	0.000418118	37.5325	41.8127	25.2279	42.6136	27.4353	20.8229	19.9907	18.6953	27.2511	25.9802	21.8425	17.6773
ENSG00000147144	0.839161	0.000642826	11.3676	10.2241	9.8056	17.7628	8.6971	6.9322	7.0083	9.3481	22.4371	7.0662	6.5082	7.4542
ENSG00000119231	0.874126	0.000200713	18.4039	14.7303	16.5981	20.8017	18.6091	10.604	11.746	9.5057	19.4732	14.2579	7.4637	9.8793
ENSG00000164758	0.79021	0.00222314	17.1545	24.7039	13.688	20.663	20.4535	13.5331	10.6062	24.1731	25.9943	15.3229	9.0337	12.2985
ENSG00000108465	0.755245	0.00450844	118.305	126.169	77.8926	162.602	78.7795	45.8466	46.0601	67.4587	103.821	70.7176	85.7883	62.9659
ENSG00000139990	0.804196	0.00161477	34.2246	33.6057	29.5523	54.2859	27.42	23.0593	15.2656	25.1785	29.3119	20.5485	14.4468	20.2949
ENSG00000146676	0.825175	0.000951363	12.4284	18.5239	15.2002	20.1368	17.2385	11.579	8.81	11.8824	14.8878	8.8715	5.2334	8.3221
ENSG00000169180	0.762238	0.00395045	34.8417	28.3419	31.5896	37.7788	34.0008	28.9713	22.4081	20.5546	38.983	30.0313	14.6185	26.947
ENSG00000142700	0.762238	0.00395045	45.0344	2.9144	0.8897	5.2819	1.007	0.3849	2.7566	0.6993	5.6162	0.3884	0.929	0.4789
ENSG00000072506	0.755245	0.00450844	181.246	161.55	173.981	261.6	193.444	126.574	168.869	102.363	260.89	185.881	96.4459	147.751
ENSG00000105447	0.867133	0.000259812	16.9087	17.7338	12.3604	24.9899	15.4681	15.6799	10.5413	10.3958	20.1522	12.2887	7.7841	7.897
ENSG00000132768	0.783217	0.00258621	12.0744	22.4957	11.8365	34.8069	12.4602	14.6578	10.4641	9.5712	16.5967	10.2931	9.4177	9.8396
ENSG00000092330	0.888112	0.000114134	39.8216	53.653	44.8958	68.8878	42.0783	37.9424	30.1752	36.0472	45.2116	41.5686	24.0123	26.0827
ENSG00000171612	0.797203	0.00190037	12.5937	11.2369	6.4739	25.7444	10.2574	3.7682	7.5708	5.4192	38.6789	25.701	4.48	6.5455
ENSG00000157326	0.839161	0.000642826	37.0515	33.2409	25.1668	30.1364	23.3694	23.5326	20.2735	25.7791	39.9079	27.2132	8.4141	18.0466
ENSG00000102390	0.818182	0.00114311	41.9635	34.6723	34.0703	33.3402	33.0091	31.9356	32.8359	24.9013	37.0167	19.4152	17.8554	25.3767
ENSG00000105677	0.762238	0.00395045	87.0604	101.794	74.3859	152.807	117.901	102.153	67.7843	59.8374	168.633	98.1492	50.6826	56.3851
ENSG00000146828	0.776224	0.00299286	11.2075	12.8553	10.0009	10.3349	12.1256	7.5084	7.7915	7.3866	12.7247	6.9443	7.9602	7.6754
ENSG00000087087	0.853147	0.000418118	90.9897	84.8491	76.4877	94.9895	83.5033	65.4173	65.8074	86.0645	128.217	68.3171	61.7416	64.6331
ENSG00000147099	0.846154	0.000521134	13.9849	10.4842	11.7353	17.4791	12.1378	7.1766	9.8106	6.763	26.5703	11.733	5.2179	7.6567
ENSG00000125826	0.769231	0.00344645	104.761	67.8846	76.9776	59.6767	63.8424	62.3094	47.5847	52.9746	84.1557	52.2714	38.1463	45.4434
ENSG00000013306	0.853147	0.000418118	95.4412	117.896	79.4644	156.601	79.1479	68.7863	66.0392	62.9871	101.49	104.47	57.2403	58.2568
ENSG00000041802	0.86014	0.000331668	14.3251	27.6325	17.8401	51.4491	16.1544	12.5207	13.1766	11.5394	23.8998	16.9789	8.3127	12.7797
ENSG00000060237	0.818182	0.00114311	30.1134	26.3534	30.2546	40.4808	35.8254	22.4065	19.6465	23.9506	55.2443	28.8123	12.114	21.51
ENSG00000151748	0.776224	0.00299286	14.508	45.4769	10.4366	22.9279	11.7558	13.2944	7.9763	11.5296	13.7067	9.7894	6.8197	8.9065
ENSG00000114978	0.825175	0.000951363	11.6616	22.9268	9.4532	8.2959	9.7208	9.001	6.4245	6.6994	11.1987	7.81	5.5212	6.3633
ENSG00000101442	0.762238	0.00395045	13.3086	13.405	8.8518	14.3602	8.6884	6.1458	6.3543	7.6838	6.7617	7.2876	5.4404	4.7769
ENSG00000143319	0.86014	0.000331668	13.942	17.1838	13.9166	19.8438	13.4293	9.8366	10.397	8.106	10.5765	10.1444	5.6635	7.553
ENSG00000171861	0.797203	0.00190037	17.012	23.1037	23.1379	40.9238	17.788	15.7486	16.7239	14.1977	18.3394	18.1042	9.8884	16.6039
ENSG00000174744	0.853147	0.000418118	34.7613	36.0618	21.04	48.7943	26.0594	32.241	23.5751	17.9805	40.389	20.7732	14.3943	13.8842
ENSG00000187531	0.776224	0.00299286	15.1131	23.9614	13.0997	39.0163	12.961	9.4224	8.1332	10.2166	11.3304	12.7334	11.0468	7.6989
ENSG00000090372	0.909091	4.19104e-05	35.773	36.7468	33.6001	43.1389	33.4896	32.538	29.9373	31.8634	46.7039	22.1812	16.7254	17.7334
ENSG00000184677	0.804196	0.00161477	15.3372	14.2236	13.4574	13.765	11.3583	6.6811	6.8193	9.3125	10.6816	8.3152	7.3211	6.7444
ENSG00000186222	0.818182	0.00114311	12.1293	28.0332	17.1273	24.7629	16.968	10.9003	15.8595	12.2492	17.1071	13.8244	8.1424	10.4429
ENSG00000083838	0.769231	0.00344645	11.725	10.0052	12.9997	13.9754	10.6461	8.5977	8.1495	10.9945	14.7164	9.6687	9.1283	8.115
ENSG00000273559	0.86014	0.000331668	22.904	35.1546	19.2898	43.6642	18.917	13.2577	11.759	21.736	22.9925	14.9739	13.2355	11.6932
ENSG00000127452	0.776224	0.00299286	20.2415	23.0354	20.4279	19.1378	21.8364	19.9845	13.577	15.0128	37.4192	13.6609	13.9383	13.5023
ENSG00000120709	0.93007	1.17022e-05	24.4006	21.9862	19.4974	34.8418	17.598	12.3403	11.1374	12.6966	34.4522	12.859	8.7997	10.8937
ENSG00000168256	0.762238	0.00395045	12.4892	22.7862	13.5375	43.3426	15.0297	9.4778	10.8325	9.1606	10.5905	11.8062	6.3174	8.9534
ENSG00000139433	0.846154	0.000521134	23.2059	33.8038	18.4628	33.6842	19.7309	21.547	16.9105	12.7296	24.0632	20.0856	8.8607	10.3117
ENSG00000099785	0.804196	0.00161477	30.7533	30.2271	22.7998	21.7131	27.7445	18.3723	19.8533	11.6373	27.3436	25.4798	14.3377	17.7028
ENSG00000102096	0.776224	0.00299286	18.2086	13.9185	17.1245	16.4256	11.9655	11.9585	12.0128	7.1028	14.7501	12.8076	6.1107	11.8217
ENSG00000055483	0.755245	0.00450844	19.4097	23.0092	18.8174	36.0043	15.2916	15.9407	12.9342	14.2808	15.7732	14.3044	9.9371	12.6545
ENSG00000169188	0.755245	0.00450844	16.2578	17.5255	18.4917	25.497	29.0239	15.0327	13.2417	8.0075	52.2299	20.5476	8.3091	14.2785
ENSG00000119559	0.818182	0.00114311	17.6084	21.9282	17.5741	30.645	11.613	17.3644	13.6701	13.9666	24.1405	14.7802	10.0111	11.4427
ENSG00000033050	0.811189	0.00136332	30.838	29.0217	20.6704	58.3897	29.684	22.0177	13.9908	16.7539	32.3537	20.3625	13.3999	18.6576
ENSG00000183258	0.755245	0.00450844	38.1486	39.0552	43.509	41.4552	44.6868	36.9694	29.9264	34.1763	41.7206	31.2045	19.3623	23.1306
ENSG00000167565	0.79021	0.00222314	71.1333	52.7826	16.536	23.7382	24.1851	23.6722	15.3648	16.7108	25.7847	9.7744	14.0404	6.5919
ENSG00000163660	0.79021	0.00222314	57.0254	40.2218	22.2234	22.5811	22.1822	14.9735	14.376	24.2748	25.5532	16.8335	15.9594	13.8599
ENSG00000009830	0.776224	0.00299286	12.7755	12.9936	11.792	26.6362	14.0098	8.4214	7.3798	11.5709	23.2089	14.2971	9.8077	10.566
ENSG00000167202	0.839161	0.000642826	12.2697	20.5706	8.4335	10.7746	8.0295	6.8909	4.2611	8.4666	14.4255	5.6551	4.0942	4.6615
ENSG00000182606	0.776224	0.00299286	18.8933	19.0283	15.435	21.0718	10.5753	10.7503	7.8183	8.2069	14.5202	14.148	4.533	10.229
ENSG00000132970	0.769231	0.00344645	11.8314	29.4097	7.8302	13.5426	8.8081	9.8107	8.832	9.3837	20.8824	5.6558	3.635	5.1662
ENSG00000102309	0.79021	0.00222314	16.3716	19.5771	14.587	29.2042	24.2907	16.68	17.2769	9.4363	30.1315	14.2213	8.0982	13.2459
ENSG00000064932	0.804196	0.00161477	23.6427	37.4559	21.3881	28.7298	28.2422	22.8169	12.6775	19.6967	32.2221	18.5698	18.3951	18.6007
ENSG00000105321	0.895105	8.36659e-05	21.3144	29.8923	16.5139	23.2133	16.7638	13.225	9.6347	15.8579	38.0186	15.2718	10.5521	13.5996
ENSG00000001497	0.797203	0.00190037	20.6778	20.2869	23.1468	24.6398	23.7042	18.9219	17.2525	17.5968	45.232	14.585	10.6784	14.775
ENSG00000136636	0.79021	0.00222314	84.317	29.8826	28.3468	34.8734	29.5592	27.4994	21.9444	31.9884	47.28	26.097	12.748	17.8814
ENSG00000184281	0.916084	2.8428e-05	38.9813	49.6663	36.3135	50.335	44.4332	31.043	38.9638	34.4056	46.5669	40.694	22.6823	25.983
ENSG00000158195	0.783217	0.00258621	41.3122	75.0828	30.3966	42.9119	30.5621	18.8506	15.1607	16.3078	27.1719	21.7967	18.0431	17.2151
ENSG00000186594	0.783217	0.00258621	48.5974	70.3652	17.0875	34.9691	18.3772	15.3806	12.4054	7.29	26.395	18.5544	17.9805	13.9998
ENSG00000213753	0.916084	2.8428e-05	12.216	14.1746	12.5028	15.9385	13.7704	8.9428	11.1476	7.9919	15.044	8.2606	5.5691	7.2732
ENSG00000226403	-0.776224	0.00299286	39.9985	67.4194	242.572	75.2162	138.119	339.276	710.708	325.758	24.3935	219.258	77.9636	356.713
ENSG00000228343	0.881119	0.000152674	8.8273	20.8868	8.8712	20.6476	11.9455	4.6892	6.8386	7.4085	16.0997	10.2777	7.5336	3.2033
ENSG00000235349	-0.853147	0.000418118	11.8222	6.4209	24.5542	2.8092	3.9107	16.55	7.2366	38.5991	0.3485	7.0354	67.5768	44.7812
ENSG00000255108	-0.881119	0.000152674	10.6579	4.8071	16.224	3.3519	11.1706	72.8765	27.199	39.494	5.8212	31.1447	20.1081	45.7618
ENSG00000261716	0.825175	0.000951363	8.8569	9.8292	10.8575	20.3045	6.9019	7.9515	4.0535	4.3969	18.9862	4.0227	3.2393	2.7293
ENSG00000269044	0.818182	0.00114311	12.6409	12.8426	9.9937	10.2127	13.0767	8.848	6.6544	11.7159	19.1521	11.3165	6.0481	4.6834
ENSG00000272053	-0.783217	0.00258621	5.3028	8.6633	22.8913	13.4238	30.3348	19.0406	27.9962	62.926	4.4761	11.787	37.0469	50.0825
ENSG00000278238	-0.825175	0.000951363	9.583	9.1848	37.403	11.3194	13.2697	50.8089	34.1725	49.4672	11.8245	24.5642	23.0715	58.7838
