# Supplementary material for: The diverging role of O-GlcNAc Transferase in corticotroph and somatotroph adenomas
Source: Research Square preprint supplement (doi:10.21203/rs.3.rs-4350199/v1), 2024-05-10
Supplement: Supplementary file 10 [file e598fc49bf57f96440f7a934.xlsx]

## Sheet: Sheet1
ID	Term	Nr. Genes	% Associated Genes	Term PValue	Associated Genes Found
GO:1905114	cell surface receptor signaling pathway involved in cell-cell signaling	68	10.241	3.68348e-06	[ADORA1, ALPK2, APCDD1L, BEGAIN, BICC1, BMP4, C3, CDH3, CHRM4, CHRNA3, DCDC2, DRD1, DRD2, EGF, FERMT1, FOLR1, GABRA3, GABRA4, GABRB1, GABRD, GABRG3, GABRR2, GATA3, GLI2, GLRA2, GLRA3, GPC3, GPC4, GPC5, GPRC5B, GRIA1, GRIA3, GRID2, GRIK1, GRIK4, GRIN2A, GRIN2B, GRM1, GRM5, HECW1, HRH3, LGR5, LY6H, MESP1, NOG, OPRM1, P2RX2, PDZD2, PKD1, PTPRO, RGS4, RSPO3, SFRP1, SHH, SLC8A3, SMAD3, SMO, SOX13, SOX…
GO:1903530	regulation of secretion by cell	65	10.7794	1.13428e-06	[ABCA12, ACHE, ADORA1, ADRA2A, ADRA2C, AGT, AVPR1B, BMP6, CACNA1H, CACNA1I, CADPS2, CAMK2A, CARTPT, CFTR, CHGA, CHRNA3, CPLX2, DRD1, DRD2, EDN3, EPHA5, F2R, F2RL1, FAM3D, FFAR4, GATA2, GHRHR, GRM2, GRP, HAP1, HRH3, HTR1A, HTR1B, IL13RA2, INHA, KCNA2, KCNA5, KCNJ11, NEUROD1, NNAT, NOS2, OPRK1, OPRM1, PLA2G1B, PRKCG, RAB26, RAB27B, RASL10B, RBP4, RHBDF2, SDC4, SFRP1, SLC16A1, SOX11, SRCIN1, STXBP2,…
GO:0099536	synaptic signaling	117	14.4623	9.8905e-21	[ACHE, ADGRB1, ADORA1, ADRA2A, AGT, AKAP12, ASIC2, ATP1A2, BDNF, BEGAIN, CACNA1A, CACNA1E, CACNG7, CACNG8, CADPS2, CALB1, CALB2, CAMK2A, CARTPT, CDH8, CHRM4, CHRNA3, CLSTN2, CNTN4, CNTNAP4, COLQ, CPLX2, CRHR2, DGKB, DRD1, DRD2, DRP2, ELAVL4, EPHA4, F2R, FABP5, GABRA3, GABRA4, GABRB1, GABRD, GABRG3, GABRR2, GAD1, GJD2, GLRA2, GLRA3, GRIA1, GRIA3, GRID2, GRID2IP, GRIK1, GRIK4, GRIN2A, GRIN2B, GRM1,…
GO:0099177	regulation of trans-synaptic signaling	68	14.561	1.97574e-12	[ACHE, ADGRB1, ADORA1, ADRA2A, AGT, AKAP12, ATP1A2, BDNF, BEGAIN, CACNA1A, CACNG7, CACNG8, CALB1, CALB2, CAMK2A, CHRNA3, CLSTN2, CNTN4, CNTNAP4, CPLX2, CRHR2, DGKB, DRD1, DRD2, ELAVL4, EPHA4, FABP5, GRIA1, GRID2, GRID2IP, GRIK1, GRIK4, GRIN2A, GRIN2B, GRM1, GRM2, GRM5, GRM8, HAP1, HCN1, HTR1B, JPH3, LAMA2, LGI1, LRFN2, LRRC4, LRRC4C, LZTS1, NLGN4Y, NOG, NTNG1, NTNG2, NTRK1, PCDH17, PRKCG, PTGS2, …
GO:0098660	inorganic ion transmembrane transport	142	13.8402	3.13853e-23	[ADCYAP1R1, ADRA2A, ANO10, ANO4, ANO9, ASIC2, ASIC4, ATP12A, ATP1A2, ATP1A3, ATP1A4, ATP2B3, ATP2C2, BEST3, BEST4, CABP1, CACNA1A, CACNA1E, CACNA1H, CACNA1I, CACNA2D3, CACNG6, CACNG7, CACNG8, CCL19, CFTR, CLCNKA, CLCNKB, CLDN16, CNGA3, CNKSR3, DPP6, DRD1, DRD2, EDN3, EHD3, F2R, F2RL3, GABRA3, GABRA4, GABRB1, GABRD, GABRG3, GABRR2, GLRA2, GLRA3, GRIK1, GRIK4, GRIN2A, GRIN2B, GRM2, GRM5, GRP, HAP1,…
GO:0098655	cation transmembrane transport	137	12.8037	3.05526e-19	[ADCYAP1R1, ADRA2A, AGT, ANO10, ASIC2, ASIC4, ATP12A, ATP1A2, ATP1A3, ATP1A4, ATP2B3, ATP2C2, CABP1, CACNA1A, CACNA1E, CACNA1H, CACNA1I, CACNA2D3, CACNG6, CACNG7, CACNG8, CCL19, CHRNA3, CLDN16, CNGA3, CNKSR3, DAPK1, DPP6, DRD1, DRD2, EDN3, EHD3, F2R, F2RL3, GRIA1, GRIA3, GRIK1, GRIK4, GRIN2A, GRIN2B, GRM2, GRP, GSG1L, HAP1, HCN1, HECW1, HPCA, HPCAL4, HSPA2, HTR1B, JPH1, JPH3, KCNA2, KCNA3, KCNA5,…
GO:0055085	transmembrane transport	179	10.3588	2.51473e-15	[ABCA12, ABCC6, ADCYAP1R1, ADRA2A, AGT, ANO10, ANO4, ANO9, AQP5, ASIC2, ASIC4, ATP12A, ATP1A2, ATP1A3, ATP1A4, ATP2B3, ATP2C2, BEST3, BEST4, C3, CABP1, CACNA1A, CACNA1E, CACNA1H, CACNA1I, CACNA2D3, CACNG6, CACNG7, CACNG8, CCL19, CFTR, CHRNA3, CLCNKA, CLCNKB, CLDN16, CNGA3, CNKSR3, CNNM1, DAPK1, DPP6, DRD1, DRD2, EDN3, EHD3, F2R, F2RL3, FABP5, FFAR4, FOLR1, GABRA3, GABRA4, GABRB1, GABRD, GABRG3, G…
GO:0051046	regulation of secretion	67	10.1669	5.31877e-06	[ABCA12, ACHE, ADORA1, ADRA2A, ADRA2C, AGT, AVPR1B, BMP6, CACNA1H, CACNA1I, CADPS2, CAMK2A, CARTPT, CFTR, CHGA, CHRNA3, CPLX2, DRD1, DRD2, EDN3, EGF, EPHA5, F2R, F2RL1, FAM3D, FFAR4, GATA2, GHRHR, GRM2, GRP, HAP1, HRH3, HTR1A, HTR1B, IL13RA2, INHA, KCNA2, KCNA5, KCNJ11, NEUROD1, NNAT, NOS2, OPRK1, OPRM1, PLA2G1B, PRKCG, RAB26, RAB27B, RASL10B, RBP4, RHBDF2, SDC4, SFRP1, SLC16A1, SOX11, SPX, SRCIN…
GO:0048858	cell projection morphogenesis	78	11.223	1.5728e-08	[ADAMTSL1, ADGRB1, ALCAM, ANOS1, BDNF, CACNG7, CCDC141, CCK, CHODL, CHRNA3, CNTN4, CNTN5, CNTN6, CPNE5, CPNE6, CRABP2, DCDC2, DRD2, DSCAM, DSCAML1, EDN3, EFNB2, ELAVL4, ENPP2, EPHA1, EPHA4, EPHA5, EPHA8, EPHB6, FLRT3, FSTL4, GAP43, GATA3, GDF7, GFRA3, GLI2, HECW1, IGF1R, IGSF9, ISL2, LAMA1, LAMA2, LGI1, LHX2, LHX3, LPAR3, LRRC4C, LZTS1, MNX1, MT3, NEFH, NEFL, NELL1, NGEF, NOG, NPPC, NTNG1, NTNG2,…
GO:0048729	tissue morphogenesis	71	10.503	8.24201e-07	[AGT, AJAP1, AR, ASTN2, BMP4, CA9, CECR2, COL11A1, CRB2, CSMD1, CYP27B1, DNAAF1, EFNB2, EGF, EPHA4, EYA1, FAT4, FERMT1, FLRT3, FOLR1, FOXQ1, FRAS1, GATA3, GDF7, GLI2, GPC3, GPC4, GRHL2, HEYL, ID4, IRX1, KDR, LAMA1, LGR5, LHX2, MESP1, MET, MICAL2, MSGN1, MTHFD1L, MYL11, NELL1, NOG, PCDH8, PKD1, ROBO2, RSPO3, SALL4, SAPCD2, SDC4, SFRP1, SHH, SHOX2, SHROOM3, SMAD3, SMO, SOX11, SPEF1, SRC, TACSTD2, T…
GO:0048666	neuron development	128	10.7113	5.09724e-12	[ADAMTSL1, ADGRB1, AGT, ALCAM, ANOS1, BDNF, C3, CACNG7, CAMK2A, CCDC141, CCK, CECR2, CHODL, CHRNA3, CLRN1, CNTF, CNTN4, CNTN5, CNTN6, CPNE5, CPNE6, CRABP2, CRB2, CRTAC1, CSMD3, DCDC2, DRD1, DRD2, DSCAM, DSCAML1, EDN3, EFHC2, EFNB2, ELAVL4, ENC1, EPHA1, EPHA4, EPHA5, EPHA8, EPHB6, FAT4, FEV, FLRT3, FOLR1, FSTL4, GABRB1, GAP43, GATA2, GATA3, GDF7, GFI1, GFRA3, GLI2, GPRIN2, GPRIN3, GRID2, HCN1, HEC…
GO:0048608	reproductive structure development	55	11.3402	1.48233e-06	[ADAM19, ADAM21, ADAM29, ADGRG1, AFP, ALOX15B, AMHR2, AR, BMP4, BMP6, C3, CHGA, CSMD1, CYP27B1, DHCR24, EPOR, ETNK2, FSHB, GAS2, GATA2, GATA3, GATA6, GDF7, GLI2, GPR149, GRHL2, ID4, IDH1, INHA, KDR, KRT19, LHB, LHX3, NOG, NR2F2, NR5A1, NTRK1, PKD1, PLCD3, PRLR, PTGS2, RBP4, ROBO2, RSPO3, SERPINE2, SFRP1, SFTPA1, SHH, SLIT1, SRC, STRA6, TESC, TFEB, VDR, ZFY]
GO:0043269	regulation of ion transport	109	14.6703	1.02949e-19	[ADCYAP1R1, ADORA1, ADRA2A, AGT, ANO9, ASIC2, ATP1A2, ATP1A3, ATP1A4, ATP2C2, AVPR1B, BEST3, CABP1, CACNA1A, CACNA1E, CACNA1H, CACNA1I, CACNA2D3, CACNG6, CACNG7, CACNG8, CAMK2A, CFTR, CHRNA3, CLCNKA, CLCNKB, CNKSR3, DAPK1, DPP6, DRD1, DRD2, EDN3, EGF, EHD3, F2R, F2RL3, GRIN2A, GRIN2B, GRM2, GRM5, GRP, GSG1L, HAP1, HCN1, HECW1, HPCA, HRH3, HSPA2, HTR1A, HTR1B, JPH1, JPH3, KCNA2, KCNA3, KCNA5, KCNB…
GO:0034765	regulation of ion transmembrane transport	86	16.2264	1.41945e-18	[ADCYAP1R1, ADRA2A, AGT, ANO9, ASIC2, ATP1A2, CABP1, CACNA1A, CACNA1E, CACNA1H, CACNA1I, CACNA2D3, CACNG6, CACNG7, CACNG8, CFTR, CLCNKA, CLCNKB, CNKSR3, DAPK1, DPP6, DRD1, DRD2, EDN3, EHD3, F2R, F2RL3, GRIN2A, GRIN2B, GRM5, GRP, GSG1L, HAP1, HCN1, HECW1, HPCA, HSPA2, JPH1, JPH3, KCNA2, KCNA3, KCNA5, KCNB2, KCNC1, KCNC4, KCND1, KCNE3, KCNE4, KCNG3, KCNG4, KCNH5, KCNH6, KCNIP1, KCNIP2, KCNIP3, KCNJ…
GO:0034762	regulation of transmembrane transport	92	14.791	4.19347e-17	[ADCYAP1R1, ADRA2A, AGT, ANO9, ASIC2, ATP1A2, C3, CABP1, CACNA1A, CACNA1E, CACNA1H, CACNA1I, CACNA2D3, CACNG6, CACNG7, CACNG8, CFTR, CLCNKA, CLCNKB, CNKSR3, DAPK1, DPP6, DRD1, DRD2, EDN3, EHD3, F2R, F2RL3, FABP5, FFAR4, GPC3, GRIN2A, GRIN2B, GRM5, GRP, GSG1L, HAP1, HCN1, HECW1, HPCA, HSPA2, JPH1, JPH3, KCNA2, KCNA3, KCNA5, KCNB2, KCNC1, KCNC4, KCND1, KCNE3, KCNE4, KCNG3, KCNG4, KCNH5, KCNH6, KCNI…
GO:0034220	ion transmembrane transport	162	12.2914	7.09619e-21	[ABCC6, ADCYAP1R1, ADRA2A, AGT, ANO10, ANO4, ANO9, ASIC2, ASIC4, ATP12A, ATP1A2, ATP1A3, ATP1A4, ATP2B3, ATP2C2, BEST3, BEST4, CABP1, CACNA1A, CACNA1E, CACNA1H, CACNA1I, CACNA2D3, CACNG6, CACNG7, CACNG8, CCL19, CFTR, CHRNA3, CLCNKA, CLCNKB, CLDN16, CNGA3, CNKSR3, DAPK1, DPP6, DRD1, DRD2, EDN3, EHD3, F2R, F2RL3, FOLR1, GABRA3, GABRA4, GABRB1, GABRD, GABRG3, GABRR2, GLRA2, GLRA3, GRIA1, GRIA3, GRID…
GO:0032989	cellular component morphogenesis	85	10.3659	1.30938e-07	[ADAMTSL1, ADGRB1, ADPRHL1, ALCAM, ANOS1, BDNF, CACNG7, CCDC141, CCK, CHODL, CHRNA3, CNTN4, CNTN5, CNTN6, CPNE5, CPNE6, CRABP2, DCDC2, DRD2, DSCAM, DSCAML1, EDN3, EFNB2, ELAVL4, ENPP2, EPHA1, EPHA4, EPHA5, EPHA8, EPHB6, FHOD3, FLRT3, FSTL4, GAP43, GATA3, GDF7, GFRA3, GLI2, HECW1, IGF1R, IGSF9, ISL2, KRT19, LAMA1, LAMA2, LGI1, LHX2, LHX3, LPAR3, LRRC4C, LZTS1, MNX1, MT3, MYOM2, NEB, NEFH, NEFL, NE…
GO:0030182	neuron differentiation	164	11.1413	6.10347e-17	[ADAMTSL1, ADGRB1, ADRA2C, AGT, ALCAM, ANOS1, ATOH8, BDNF, BHLHE22, BMP4, BMP6, BRINP1, BRINP2, BRINP3, C3, CACNG7, CAMK2A, CASZ1, CCDC141, CCK, CECR2, CHODL, CHRNA3, CLRN1, CNTF, CNTN4, CNTN5, CNTN6, CPNE5, CPNE6, CRABP2, CRB2, CRTAC1, CSMD3, DBX1, DCDC2, DMRTA2, DRD1, DRD2, DSCAM, DSCAML1, EDN3, EFHC2, EFNB2, ELAVL4, ENC1, EPHA1, EPHA4, EPHA5, EPHA8, EPHB6, EYA1, FAIM2, FAT4, FEV, FGFR1, FLRT3,…
GO:0023061	signal release	54	10.5882	1.72008e-05	[ABCA12, ADORA1, ADRA2A, ADRA2C, AGT, BMP6, CADPS2, CAMK2A, CARTPT, CFTR, CHGA, CHRNA3, CPLX2, DRD1, DRD2, EDN3, EPHA5, F2R, F2RL1, FAM3D, FFAR4, GATA3, GHRHR, GRM2, GRP, HRH3, HTR1A, HTR1B, ILDR2, INHA, KCNA2, KCNA5, KCNJ11, MC4R, NEUROD1, NNAT, NOS2, OPRK1, OPRM1, PRKCG, PTGS2, RASL10B, RBP4, SFRP1, SLC16A1, SOX11, STXBP2, SYT10, SYT7, TFR2, TRPV6, TUNAR, UNC13C, WLS]
GO:0022857	transmembrane transporter activity	157	10.9484	1.55317e-15	[ABCA12, ABCC6, ADRA2A, ANO10, ANO4, ANO9, AQP5, ASIC2, ASIC4, ATP12A, ATP1A2, ATP1A3, ATP1A4, ATP2B3, ATP2C2, BEST3, BEST4, CABP1, CACNA1A, CACNA1E, CACNA1H, CACNA1I, CACNA2D3, CACNG6, CACNG7, CACNG8, CFTR, CHRNA3, CLCNKA, CLCNKB, CLDN16, CNGA3, CNKSR3, CNNM1, DAPK1, DPP6, DRD2, EHD3, GABRA3, GABRA4, GABRB1, GABRD, GABRG3, GABRR2, GJB7, GJD2, GLRA2, GLRA3, GRIA1, GRIA3, GRID2, GRIK1, GRIK4, GRIN…
GO:0022803	passive transmembrane transporter activity	111	14.7606	2.06803e-20	[ANO10, ANO4, ANO9, AQP5, ASIC2, ASIC4, BEST3, BEST4, CABP1, CACNA1A, CACNA1E, CACNA1H, CACNA1I, CACNA2D3, CACNG6, CACNG7, CACNG8, CFTR, CHRNA3, CLCNKA, CLCNKB, CNGA3, DAPK1, DPP6, DRD2, EHD3, GABRA3, GABRA4, GABRB1, GABRD, GABRG3, GABRR2, GJB7, GJD2, GLRA2, GLRA3, GRIA1, GRIA3, GRID2, GRIK1, GRIK4, GRIN2A, GRIN2B, GRM2, GRM5, GRP, GSG1L, HAP1, HCN1, HPCA, HPCAL4, HTR1B, JPH1, JPH3, KCNA2, KCNA3,…
GO:0022008	neurogenesis	182	10.2767	3.24276e-15	[ADAMTSL1, ADGRB1, ADGRG1, ADRA2C, AGT, ALCAM, ANOS1, ASTN1, ASTN2, ATOH8, BDNF, BHLHE22, BMP4, BMP6, BRINP1, BRINP2, BRINP3, C3, CACNG7, CAMK2A, CASZ1, CCDC141, CCK, CDK6, CECR2, CHODL, CHRNA3, CLRN1, CNTF, CNTN4, CNTN5, CNTN6, CPNE5, CPNE6, CRABP2, CRB2, CRTAC1, CSMD3, DBX1, DCDC2, DMRTA2, DRD1, DRD2, DSCAM, DSCAML1, EDN3, EFHC2, EFNB2, ELAVL4, ENC1, EPHA1, EPHA4, EPHA5, EPHA8, EPHB6, EYA1, FAI…
GO:0015318	inorganic molecular entity transmembrane transporter activity	137	13.3528	6.03369e-21	[ABCC6, ADRA2A, ANO10, ANO4, ANO9, AQP5, ASIC2, ASIC4, ATP12A, ATP1A2, ATP1A3, ATP1A4, ATP2B3, ATP2C2, BEST3, BEST4, CABP1, CACNA1A, CACNA1E, CACNA1H, CACNA1I, CACNA2D3, CACNG6, CACNG7, CACNG8, CFTR, CHRNA3, CLCNKA, CLCNKB, CLDN16, CNGA3, CNKSR3, DAPK1, DPP6, DRD2, EHD3, GABRA3, GABRA4, GABRB1, GABRD, GABRG3, GABRR2, GLRA2, GLRA3, GRIA1, GRIA3, GRID2, GRIK1, GRIK4, GRIN2A, GRIN2B, GRM2, GRM5, GRP…
GO:0015075	ion transmembrane transporter activity	145	12.7082	4.76595e-20	[ABCC6, ADRA2A, ANO10, ANO4, ANO9, ASIC2, ASIC4, ATP12A, ATP1A2, ATP1A3, ATP1A4, ATP2B3, ATP2C2, BEST3, BEST4, CABP1, CACNA1A, CACNA1E, CACNA1H, CACNA1I, CACNA2D3, CACNG6, CACNG7, CACNG8, CFTR, CHRNA3, CLCNKA, CLCNKB, CLDN16, CNGA3, CNKSR3, DAPK1, DPP6, DRD2, EHD3, GABRA3, GABRA4, GABRB1, GABRD, GABRG3, GABRR2, GLRA2, GLRA3, GRIA1, GRIA3, GRID2, GRIK1, GRIK4, GRIN2A, GRIN2B, GRM2, GRM5, GRP, GSG1…
GO:0008015	blood circulation	66	11.9782	1.42619e-08	[ADORA1, ADRA2A, ADRA2C, AGT, AKAP12, AR, ASIC2, ATP1A2, ATP1A3, ATP1A4, ATP2B3, AVPR1B, BMP6, BVES, C2CD4A, C2CD4B, CACNA1H, CARTPT, CHGA, CPS1, DRD1, DRD2, EDN3, EHD3, EMILIN2, ERAP2, F2R, F2RL1, GATA6, HCN1, HRH2, HTR1A, HTR1B, HTR1D, KCNA5, KCNE3, KCNE4, KCNH6, KCNIP2, KCNJ2, KCNN2, NOS1, NOS2, NR2F2, P2RX2, PTGS2, PTPRO, RASL10B, RGS2, RGS4, SCN10A, SCN1B, SCN2B, SCNN1A, SGCZ, SHOX2, SLC4A4,…
GO:0007399	nervous system development	267	10.1098	7.04969e-22	[ACHE, ADAM23, ADAMTSL1, ADGRB1, ADGRB2, ADGRG1, ADORA1, ADRA2C, AGT, ALCAM, AMIGO2, ANOS1, APOB, ASIC2, ASTN1, ASTN2, ATOH8, ATP1A2, ATP1A3, BAG3, BDNF, BHLHE22, BMP4, BMP6, BRINP1, BRINP2, BRINP3, C3, CACNA1A, CACNG7, CAMK2A, CASZ1, CCDC141, CCK, CDK6, CECR2, CHODL, CHRNA3, CKB, CLDN1, CLRN1, CLSTN2, CNTF, CNTN4, CNTN5, CNTN6, COLQ, CPLX2, CPNE5, CPNE6, CRABP2, CRB2, CRTAC1, CSMD3, CTTNBP2, DBX…
GO:0007267	cell-cell signaling	203	11.4237	2.2629e-22	[ABCA12, ACHE, ADGRB1, ADGRG1, ADORA1, ADRA2A, ADRA2C, AGT, AKAP12, ALPK2, APCDD1L, AR, ASIC2, ATP1A2, BDNF, BEGAIN, BICC1, BMP4, BMP6, C3, CACNA1A, CACNA1E, CACNG7, CACNG8, CADPS2, CALB1, CALB2, CAMK2A, CARTPT, CCL24, CCN5, CDH3, CDH8, CFTR, CHGA, CHRM4, CHRNA3, CLSTN2, CNTN4, CNTNAP4, COLQ, CPLX2, CRHR2, CXCL13, DCDC2, DGKB, DRD1, DRD2, DRP2, ECE2, EDN3, EFNB2, EGF, ELAVL4, EPHA4, EPHA5, F2R, F…
GO:0006935	chemotaxis	69	10.3448	2.44737e-06	[ADAMTSL1, ALCAM, ANGPT2, ANOS1, BDNF, BMP4, BST1, CCDC141, CCL19, CCL24, CCL28, CDH13, CHGA, CNTN4, CNTN5, CNTN6, CXCL13, CXCL17, DSCAM, DSCAML1, EDN3, EFNB2, ENC1, ENPP2, EPHA1, EPHA4, EPHA5, EPHA8, EPHB6, F2RL1, FGFR1, FLRT3, GAP43, GATA3, GDF7, GFRA3, GLI2, IGSF9, ISL2, KDR, LAMA1, LAMA2, LGI1, LHX2, LHX3, LZTS1, MET, NELL1, NOG, NTRK1, PDGFD, PIK3C2G, PLA2G1B, PLA2G7, PLD1, PTPRO, ROBO2, SCN…
GO:0006811	ion transport	194	11.5476	5.7344e-22	[ABCC6, ADCYAP1R1, ADORA1, ADRA2A, AGT, ANO10, ANO4, ANO9, ASIC2, ASIC4, ATP12A, ATP1A2, ATP1A3, ATP1A4, ATP2B3, ATP2C2, AVPR1B, BEST3, BEST4, BSPRY, CABP1, CACNA1A, CACNA1E, CACNA1H, CACNA1I, CACNA2D3, CACNG6, CACNG7, CACNG8, CAMK2A, CCL19, CFTR, CHRNA3, CLCNKA, CLCNKB, CLDN16, CNGA3, CNKSR3, CNNM1, CYP27B1, DAPK1, DPP6, DRD1, DRD2, EDN3, EGF, EHD3, F2R, F2RL3, FOLR1, GABRA3, GABRA4, GABRB1, GAB…
GO:0003013	circulatory system process	68	10.675	8.99622e-07	[ADORA1, ADRA2A, ADRA2C, AGT, AKAP12, AR, ASIC2, ATP1A2, ATP1A3, ATP1A4, ATP2B3, AVPR1B, BMP6, BVES, C2CD4A, C2CD4B, CACNA1H, CARTPT, CHGA, CPS1, DRD1, DRD2, EDN3, EHD3, EMILIN2, ERAP2, F2R, F2RL1, FABP5, GATA6, HCN1, HRH2, HTR1A, HTR1B, HTR1D, KCNA5, KCNE3, KCNE4, KCNH6, KCNIP2, KCNJ2, KCNN2, NOS1, NOS2, NR2F2, P2RX2, PTGS2, PTPRO, RASL10B, RGS2, RGS4, SCN10A, SCN1B, SCN2B, SCNN1A, SGCZ, SHOX2, …
GO:0002009	morphogenesis of an epithelium	60	10.6383	5.12266e-06	[AGT, AJAP1, AR, ASTN2, BMP4, CA9, CECR2, CSMD1, CYP27B1, DNAAF1, EFNB2, EGF, EPHA4, EYA1, FAT4, FERMT1, FLRT3, FOLR1, FOXQ1, FRAS1, GATA3, GDF7, GLI2, GPC3, GPC4, GRHL2, ID4, IRX1, KDR, LAMA1, LGR5, LHX2, MESP1, MET, MICAL2, MTHFD1L, NELL1, NOG, PCDH8, PKD1, RSPO3, SALL4, SAPCD2, SDC4, SFRP1, SHH, SHROOM3, SMAD3, SMO, SOX11, SPEF1, SRC, TACSTD2, TCAP, TMEFF2, TRIM71, VDR, WNT10A, WNT11, WNT6]
